# Supplementary material for: AgNTf2 catalyzed cycloaddition of N-acyliminium ions with alkynes for the synthesis of the 3,4-dihydro-1,3-oxazin-2-one skeleton
Source: Royal Society of Chemistry journal article supplement (doi:10.1039/d2ob00900e), 2022-01-01

# Supporting Information

## AgNTf<sub>2</sub> Catalyzed Cycloaddition of *N*-Acyliminium ions with Alkynes for the Synthesis of 3,4-Dihydro-1,3-oxazin-2-one Skeleton

Wen-Ke Xu, Jia-Ming Guo, Chang-Hong Liu, Jian-Ting Sun, Min Lv and Bang-Guo Wei\*

*School of Pharmacy and Institutes of Biomedical Sciences, Fudan University, 826  
Zhangheng Road, Shanghai 201203, China*

Email: : [bgwei1974@fudan.edu.cn](mailto:bgwei1974@fudan.edu.cn)

### Table of Contents

|                                                                                             |         |
|---------------------------------------------------------------------------------------------|---------|
| I.The synthetic details data for the substrates <b>1a-1s</b> .....                          | S2-S5   |
| II.X-Ray Structure for compound <b>3ae</b> .....                                            | S5-S8   |
| III.Copies of <sup>1</sup> H NMR, <sup>13</sup> C NMR and <sup>19</sup> F NMR Spectrum..... | S9-S109 |

## I. The synthetic details data for the substrates 1a-1s.

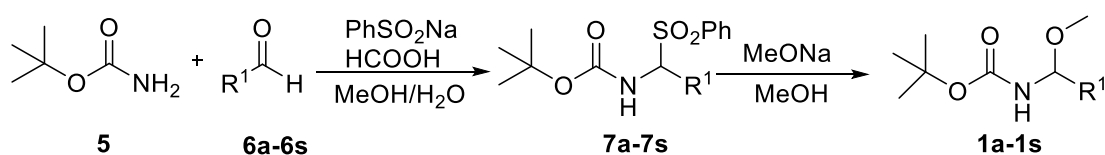

**General Procedure for the Synthesis of 1a-1s.** First, a mixture of an aldehyde **6a-6s** (20 mmol), *tert*-butyl carbamate **5** (10 mmol), sodium benzenesulfinate (25 mmol) and formic acid (20 mmol) in methanol/water 1/2 (30 mL) under nitrogen was stirred at room temperature for 24 h. After cooling at 0°C, the resulting solid was separated by filtration, solubilized in dichloromethane (30 mL) and the organic layer was dried (MgSO<sub>4</sub>). After concentration in vacuo, sulfones **7a-7s** was obtained without further purification.

Next, **7a-7s** (10 mmol), was added to a solution of sodium methoxide (30 mmol) in methanol (60 mL), and the mixture was stirred at room temperature for 2 hours. After dilution with water, the resulting mixture was extracted with dichloromethane and dried over anhydrous Na<sub>2</sub>SO<sub>4</sub>. After the solvents were evaporated, The crude product was purified by flash chromatography on silica gel with PE/EtOAc to obtain **1a-1s**.

Among the following compounds, **1a**, **1b**, **1d**, **1e**, **1f**, **1g**, **1k**, **1o**, **1p** are known compounds, so this paper only tests their <sup>1</sup>H NMR spectra, and their <sup>1</sup>H NMR spectra data are consistent with the literature.<sup>23</sup>

***tert*-Butyl (methoxy(phenyl)methyl)carbamate (1a).** White solid (2.73 g, 64%, PE:EA = 9:1, R<sub>f</sub> = 0.25); mp 67-68 °C; <sup>1</sup>H NMR (400 MHz, CDCl<sub>3</sub>) δ 7.44-7.40 (m, 2H), 7.38-7.29 (m, 3H), 5.82 (d, *J* = 10.0 Hz, 1H), 5.15 (d, *J* = 7.2 Hz, 1H), 3.44 (s, 3H), 1.48 (s, 9H) ppm.

***tert*-Butyl (methoxy(*p*-tolyl)methyl)carbamate (1b).** White solid (3.29 g, 77%, PE:EA = 9:1, R<sub>f</sub> = 0.25); mp 134-135 °C; <sup>1</sup>H NMR (400 MHz, CDCl<sub>3</sub>) δ 7.33-7.26 (m, 2H), 7.20-7.12 (m, 2H), 5.78 (d, *J* = 9.2 Hz, 1H), 5.13 (d, *J* = 7.6 Hz, 1H), 3.43 (s, 3H), 2.34 (s, 3H), 1.47 (s, 9H) ppm.

***tert*-Butyl ((4-(*tert*-butyl)phenyl)(methoxy)methyl)carbamate (1c).** White solid (4.03 g, 81%, PE:EA = 9:1, R<sub>f</sub> = 0.25); IR (film): ν<sub>max</sub> 2963, 2904, 1716, 1512, 1363, 1169, 1080, 892 cm<sup>-1</sup>; mp 83-84 °C; <sup>1</sup>H NMR (400 MHz, CDCl<sub>3</sub>) δ 7.40-7.33 (m, 4H), 5.79 (d, *J* = 9.6 Hz, 1H), 5.10 (d, *J* = 7.6 Hz, 1H), 3.44 (s, 3H), 1.47 (s, 9H), 1.31 (s, 9H) ppm; <sup>13</sup>C{<sup>1</sup>H} NMR (100 MHz, CDCl<sub>3</sub>) δ 155.4, 151.6, 136.6, 125.7, 125.6, 83.5, 80.1, 55.6,

34.7, 31.4, 28.4 ppm; HRMS (ESI)  $m/z$ :  $[M + Na]^+$  Calcd for  $C_{17}H_{27}NO_3Na^+$ , 316.1883, found 316.1885.

***tert*-Butyl (methoxy(4-methoxyphenyl)methyl)carbamate (1d)**. White solid (3.04 g, 67%, PE:EA = 9:1,  $R_f$  = 0.25); mp 135-136 °C;  $^1H$  NMR (400 MHz,  $CDCl_3$ )  $\delta$  7.36-7.34 (m, 2H), 6.91-6.89 (m, 2H), 5.78 (d,  $J$  = 9.6 Hz, 1H), 5.16 (d,  $J$  = 8.0 Hz, 1H), 3.81 (s, 3H), 3.44 (s, 3H), 1.49 (s, 9H) ppm.

***tert*-Butyl ((4-bromophenyl)(methoxy)methyl)carbamate (1e)**. White solid (3.05 g, 57%, PE:EA = 9:1,  $R_f$  = 0.25); mp 89-90 °C;  $^1H$  NMR (400 MHz,  $CDCl_3$ )  $\delta$  7.50-7.45 (m, 2H), 7.32-7.28 (m, 2H), 5.79 (d,  $J$  = 9.6 Hz, 1H), 5.10 (d,  $J$  = 8.4 Hz, 1H), 3.42 (s, 3H), 1.48 (s, 9H) ppm.

***tert*-Butyl (methoxy(4-(trifluoromethyl)phenyl)methyl)carbamate (1f)**. White solid (2.64 g, 51%, PE:EA = 9:1,  $R_f$  = 0.25); mp 161-162 °C;  $^1H$  NMR (400 MHz,  $CDCl_3$ )  $\delta$  7.65-7.59 (m, 2H), 7.58-7.52 (m, 2H), 5.89 (d,  $J$  = 10.0 Hz, 1H), 5.09 (d,  $J$  = 7.6 Hz, 1H), 3.48 (s, 3H), 1.49 (s, 9H) ppm.

***tert*-Butyl ((4-cyanophenyl)(methoxy)methyl)carbamate (1g)**. White solid (2.41 g, 54%, PE:EA = 9:1,  $R_f$  = 0.25); mp 111-112 °C;  $^1H$  NMR (400 MHz,  $CDCl_3$ )  $\delta$  7.68-7.62 (m, 2H), 7.58-7.53 (m, 2H), 5.87 (d,  $J$  = 9.6 Hz, 1H), 5.18-4.94 (d,  $J$  = 8.8 Hz, 1H), 3.48 (s, 3H), 1.49 (s, 9H) ppm.

***tert*-Butyl (methoxy(*m*-tolyl)methyl)carbamate (1h)**. Colorless oil (2.99 g, 70%, PE:EA = 9:1,  $R_f$  = 0.25); IR (film):  $\nu_{max}$  2978, 2930, 1713, 1514, 1367, 1248, 1165, 965  $cm^{-1}$ ;  $^1H$  NMR (400 MHz,  $CDCl_3$ )  $\delta$  7.28-7.16 (m, 3H), 7.16-7.09 (m, 1H), 5.77 (d,  $J$  = 9.6 Hz, 1H), 5.11 (s, 1H), 3.44 (s, 3H), 2.35 (s, 3H), 1.48 (s, 9H) ppm;  $^{13}C\{^1H\}$  NMR (100 MHz,  $CDCl_3$ )  $\delta$  155.4, 139.5, 133.4, 129.3, 128.6, 126.6, 123.0, 83.7, 80.2, 55.6, 28.4, 21.5 ppm; HRMS (ESI)  $m/z$ :  $[M + Na]^+$  Calcd for  $C_{14}H_{21}NO_3Na^+$ , 274.1414, found 274.1418.

***tert*-Butyl ((3-chlorophenyl)(methoxy)methyl)carbamate (1i)**. White solid (2.17 g, 47%, PE:EA = 9:1,  $R_f$  = 0.25); mp 87-88 °C; IR (film):  $\nu_{max}$  2980, 2933, 1712, 1518, 1363, 1242, 1171, 769  $cm^{-1}$ ;  $^1H$  NMR (400 MHz,  $CDCl_3$ )  $\delta$  7.43-7.38 (m, 1H), 7.31-7.25 (m, 3H), 5.79 (d,  $J$  = 9.6 Hz, 1H), 5.13 (d,  $J$  = 8.4 Hz, 1H), 3.45 (s, 3H), 1.48 (s, 9H) ppm;  $^{13}C\{^1H\}$  NMR (100 MHz,  $CDCl_3$ )  $\delta$  155.4, 141.7, 134.6, 129.9, 128.6, 126.4, 124.3, 82.9, 80.4, 55.7, 28.4 ppm; HRMS (ESI)  $m/z$ :  $[M + Na]^+$  Calcd for  $C_{13}H_{18}ClNO_3Na^+$ , 294.0867, found 294.0871.

***tert*-Butyl ((3-bromophenyl)(methoxy)methyl)carbamate (1j)**. White solid (2.51 g, 47%, PE:EA = 9:1,  $R_f$  = 0.25); mp 84-85 °C; IR (film):  $\nu_{max}$  2980, 2932, 1700, 1514, 1365,

1245, 1165, 782  $\text{cm}^{-1}$ ;  $^1\text{H}$  NMR (400 MHz,  $\text{CDCl}_3$ )  $\delta$  7.63-7.56 (m, 1H), 7.48-7.40 (m, 1H), 7.37-7.31 (m, 1H), 7.25-7.19 (m, 1H), 5.80 (d,  $J = 10.0$  Hz, 1H), 5.11 (d,  $J = 5.6$  Hz, 1H), 3.45 (s, 3H), 1.49 (s, 9H) ppm;  $^{13}\text{C}\{^1\text{H}\}$  NMR (100 MHz,  $\text{CDCl}_3$ )  $\delta$  156.3, 141.9, 131.6, 130.2, 129.3, 124.8, 122.8, 82.8, 80.5, 55.8, 28.4 ppm; HRMS (ESI)  $m/z$ :  $[\text{M} + \text{Na}]^+$  Calcd for  $\text{C}_{13}\text{H}_{18}\text{BrNO}_3\text{Na}^+$ , 338.0362, found 338.0365.

***tert*-Butyl (methoxy(*o*-tolyl)methyl)carbamate (1k).** White solid (2.90 g, 72%, PE:EA = 9:1,  $R_f = 0.25$ ); mp 131-132  $^\circ\text{C}$ ;  $^1\text{H}$  NMR (400 MHz,  $\text{CDCl}_3$ )  $\delta$  7.51-7.44 (m, 1H), 7.23-7.14 (m, 3H), 5.91 (d,  $J = 10.0$  Hz, 1H), 5.05 (d,  $J = 8.4$  Hz, 1H), 3.44 (s, 3H), 2.33 (s, 3H), 1.46 (s, 9H) ppm.

***tert*-Butyl (cyclopropyl(methoxy)methyl)carbamate (1l).** Colorless oil (2.39 g, 70%, PE:EA = 9:1,  $R_f = 0.25$ ); IR (film):  $\nu_{\text{max}}$  2978, 2932, 1710, 1516, 1365, 1244, 1171, 782  $\text{cm}^{-1}$ ;  $^1\text{H}$  NMR (400 MHz,  $\text{CDCl}_3$ )  $\delta$  5.06-4.91 (m, 1H), 4.58-4.43 (m, 1H), 3.34 (s, 3H), 1.46 (s, 9H), 1.08-0.99 (m, 1H), 0.55-0.36 (m, 4H) ppm;  $^{13}\text{C}\{^1\text{H}\}$  NMR (100 MHz,  $\text{CDCl}_3$ )  $\delta$  155.5, 84.8, 79.8, 55.6, 28.4, 15.6, 2.1, 1.3 ppm; HRMS (ESI)  $m/z$ :  $[\text{M} + \text{Na}]^+$  Calcd for  $\text{C}_{15}\text{H}_{23}\text{NO}_3\text{Na}^+$ , 288.1570, found 288.1571.

***tert*-Butyl (cyclohexyl(methoxy)methyl)carbamate (1m).** White solid (1.33 g, 79%, PE:EA = 9:1,  $R_f = 0.25$ ); IR (film):  $\nu_{\text{max}}$  2929, 2853, 1700, 1516, 1365, 1173, 1078, 957  $\text{cm}^{-1}$ ; mp 74-75  $^\circ\text{C}$ ;  $^1\text{H}$  NMR (400 MHz,  $\text{CDCl}_3$ )  $\delta$  4.82 (d,  $J = 10.0$  Hz, 1H), 4.63-4.48 (m, 1H), 3.33 (s, 3H), 1.83-1.61 (m, 5H), 1.49-1.42 (m, 1H), 1.46 (s, 9H), 1.28-1.00 (m, 5H) ppm;  $^{13}\text{C}\{^1\text{H}\}$  NMR (100 MHz,  $\text{CDCl}_3$ )  $\delta$  155.9, 86.7, 79.6, 55.6, 42.9, 28.4, 27.9, 26.4, 25.9, 25.8 ppm; HRMS (ESI)  $m/z$ :  $[\text{M} + \text{Na}]^+$  Calcd for  $\text{C}_{13}\text{H}_{25}\text{NO}_3\text{Na}^+$ , 266.1727, found 266.1728.

***tert*-Butyl (1-methoxybutyl)carbamate (1n).** Colorless oil (2.42 g, 70%, PE:EA = 9:1,  $R_f = 0.25$ ); IR (film):  $\nu_{\text{max}}$  2963, 2871, 1710, 1514, 1365, 1175, 942, 767  $\text{cm}^{-1}$ ;  $^1\text{H}$  NMR (400 MHz,  $\text{CDCl}_3$ )  $\delta$  4.96-4.72 (m, 2H), 3.34 (s, 3H), 1.69-1.57 (m, 1H), 1.54-1.49 (m, 1H), 1.46 (s, 9H), 1.43-1.34 (m, 2H), 0.93 (t, 3H) ppm;  $^{13}\text{C}\{^1\text{H}\}$  NMR (100 MHz,  $\text{CDCl}_3$ )  $\delta$  155.7, 82.9, 79.7, 55.4, 37.8, 28.4, 18.3, 13.8 ppm; HRMS (ESI)  $m/z$ :  $[\text{M} + \text{Na}]^+$  Calcd for  $\text{C}_{10}\text{H}_{21}\text{NO}_3\text{Na}^+$ , 226.1414, found 226.1411.

***tert*-Butyl (1-methoxy-2-methylpropyl)carbamate (1o).** Colorless oil (1.98 g, 57%, PE:EA = 9:1,  $R_f = 0.25$ );  $^1\text{H}$  NMR (400 MHz,  $\text{CDCl}_3$ )  $\delta$  4.79 (d,  $J = 9.6$  Hz, 1H), 4.56 (dd,  $J = 10.0$  Hz, 5.6 Hz, 1H), 3.34 (s, 3H), 1.84-1.72 (m, 1H), 1.46 (s, 9H), 0.96-0.89 (m, 6H) ppm.

***tert*-Butyl (1-methoxy-3-methylbutyl)carbamate (1p).** Colorless oil (2.32 g, 63%, PE:EA = 9:1,  $R_f = 0.25$ );  $^1\text{H}$  NMR (400 MHz,  $\text{CDCl}_3$ )  $\delta$  4.92-4.84 (m, 1H), 4.83-4.67 (m,

1H), 3.34 (s, 3H), 1.77-1.66 (m, 1H), 1.60-1.51 (m, 1H), 1.46 (s, 9H), 1.42-1.32 (m, 1H), 0.96-0.88 (m, 6H) ppm.

**tert-Butyl (1-methoxy-3-phenylpropyl)carbamate (1q).** White solid (3.56 g, 79%, PE:EA = 9:1, Rf = 0.25); mp 78-79 °C; IR (film):  $\nu_{\max}$  2976, 2933, 1712, 1514, 1363, 1167, 1045, 698  $\text{cm}^{-1}$ ;  $^1\text{H}$  NMR (400 MHz,  $\text{CDCl}_3$ )  $\delta$  7.31-7.24 (m, 2H), 7.23-7.11 (m, 3H), 4.83 (s, 1H), 3.35 (s, 3H), 2.77-2.60 (m, 2H), 2.02-1.89 (m, 1H), 1.88-1.76 (m, 1H), 1.46 (s, 9H) ppm;  $^{13}\text{C}\{^1\text{H}\}$  NMR (100 MHz,  $\text{CDCl}_3$ )  $\delta$  155.6, 141.4, 128.6, 128.5, 126.1, 82.6, 79.5, 55.4, 37.5, 31.4, 28.3 ppm; HRMS (ESI) m/z:  $[\text{M} + \text{Na}]^+$  Calcd for  $\text{C}_{15}\text{H}_{23}\text{NO}_3\text{Na}^+$ , 288.1570, found 288.1571.

**tert-Butyl (2-(benzyloxy)-1-methoxyethyl)carbamate (1r).** Colorless oil (3.15 g, 66%, PE:EA = 9:1, Rf = 0.25); IR (film):  $\nu_{\max}$  2976, 2931, 1712, 1500, 1365, 1169, 739, 694  $\text{cm}^{-1}$ ;  $^1\text{H}$  NMR (400 MHz,  $\text{CDCl}_3$ )  $\delta$  7.37-7.27 (m, 5H), 5.28 (d,  $J = 9.2$  Hz, 1H), 4.98 (d,  $J = 9.6$  Hz, 1H), 4.61-4.53 (m, 2H), 3.60-3.48 (m, 2H), 3.38 (s, 3H), 1.46 (s, 9H) ppm;  $^{13}\text{C}\{^1\text{H}\}$  NMR (100 MHz,  $\text{CDCl}_3$ )  $\delta$  155.5, 137.8, 128.5, 127.9, 81.3, 80.0, 73.7, 71.4, 55.7, 28.4 ppm; HRMS (ESI) m/z:  $[\text{M} + \text{Na}]^+$  Calcd for  $\text{C}_{15}\text{H}_{23}\text{NO}_4\text{Na}^+$ , 304.1519, found 304.1512.

**tert-Butyl (methoxy(thiophen-2-yl)methyl)carbamate (1s).** White solid (1.74 g, 42%, PE:EA = 9:1, Rf = 0.25); mp 78-79 °C; IR (film):  $\nu_{\max}$  2980, 2929, 1710, 1504, 1242, 1165, 1076, 698  $\text{cm}^{-1}$ ;  $^1\text{H}$  NMR (400 MHz,  $\text{CDCl}_3$ )  $\delta$  7.30-7.21 (m, 1H), 7.06-7.02 (m, 1H), 6.99-6.94 (m, 1H), 6.05 (d,  $J = 9.6$  Hz, 1H), 5.26 (d,  $J = 4.8$  Hz, 1H), 3.47 (s, 3H), 1.49 (s, 9H) ppm;  $^{13}\text{C}\{^1\text{H}\}$  NMR (100 MHz,  $\text{CDCl}_3$ )  $\delta$  156.1, 143.2, 126.9, 125.6, 124.7, 80.8, 80.5, 55.8, 28.4 ppm; HRMS (ESI) m/z:  $[\text{M} + \text{Na}]^+$  Calcd for  $\text{C}_{11}\text{H}_{17}\text{NO}_3\text{SNa}^+$ , 266.0821, found 266.0823.

## II.X-Ray Structure for compound 3ae

ORTEP drawing of the X-ray crystallographic structure of 3ae

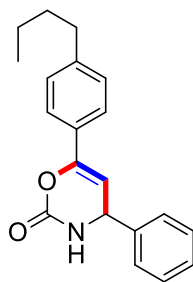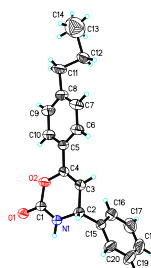

CCDC 2168786. For detailed crystallographic data, please refer to the Cambridge Crystallographic Data Centre at <http://ccdc.cam.ac.uk>.

Table 1. Crystal data and structure refinement for **3ae**.

|                                 |                                          |                               |
|---------------------------------|------------------------------------------|-------------------------------|
| Identification code             | <b>3ae</b>                               |                               |
| Empirical formula               | $C_{20}H_{21}NO_2$                       |                               |
| Formula weight                  | 307.38                                   |                               |
| Temperature                     | 293(2)K                                  |                               |
| Wavelength                      | 0.71073 Å                                |                               |
| Crystal system                  | Triclinic                                |                               |
| Space group                     | P -1                                     |                               |
| Unit cell dimensions            | $a = 9.6668(6)$ Å                        | $\alpha = 91.153(2)^\circ$ .  |
|                                 | $b = 13.1481(7)$ Å                       | $\beta = 94.071(2)^\circ$ .   |
|                                 | $c = 13.9023(9)$ Å                       | $\gamma = 104.497(2)^\circ$ . |
| Volume                          | $1705.09(18)$ Å <sup>3</sup>             |                               |
| Z                               | 4                                        |                               |
| Density (calculated)            | 1.197 Mg/m <sup>3</sup>                  |                               |
| Absorption coefficient          | 0.077 mm <sup>-1</sup>                   |                               |
| F(000)                          | 656                                      |                               |
| Crystal size                    | 0.190 x 0.150 x 0.110 mm <sup>3</sup>    |                               |
| Theta range for data collection | 2.722 to 25.998°.                        |                               |
| Index ranges                    | -11 ≤ h ≤ 11, -16 ≤ k ≤ 16, -17 ≤ l ≤ 17 |                               |

|                                   |                                             |
|-----------------------------------|---------------------------------------------|
| Reflections collected             | 33470                                       |
| Independent reflections           | 6677 [R(int) = 0.0549]                      |
| Completeness to theta = 25.242°   | 99.7%                                       |
| Absorption correction             | Semi-empirical from equivalents             |
| Max. and min. transmission        | 0.7456 and 0.7006                           |
| Refinement method                 | Full-matrix least-squares on F <sup>2</sup> |
| Data / restraints / parameters    | 6677 / 112 / 492                            |
| Goodness-of-fit on F <sup>2</sup> | 1.036                                       |
| Final R indices [I>2sigma(I)]     | R1 = 0.0639, wR2 = 0.1495                   |
| R indices (all data)              | R1 = 0.1155, wR2 = 0.1848                   |
| Extinction coefficient            | 0.028(5)                                    |
| Largest diff. peak and hole       | 0.173 and -0.160 e.Å <sup>-3</sup>          |

Table 1. Atomic coordinates ( $\times 10^4$ ) and equivalent isotropic displacement parameters ( $\text{\AA}^2 \times 10^3$ ) for **3ae**. U(eq) is defined as one third of the trace of the orthogonalized  $U^{ij}$  tensor.

|        | x        | y        | z         | U(eq)  |
|--------|----------|----------|-----------|--------|
| O(1)   | 3009(2)  | 3956(1)  | 3893(1)   | 85(1)  |
| O(2)   | 3600(2)  | 5291(1)  | 2956(1)   | 73(1)  |
| N(1)   | 5354(2)  | 4724(2)  | 3833(1)   | 66(1)  |
| C(1)   | 3982(3)  | 4622(2)  | 3596(2)   | 65(1)  |
| C(2)   | 6569(2)  | 5523(2)  | 3519(2)   | 62(1)  |
| C(3)   | 6002(3)  | 6232(2)  | 2866(2)   | 66(1)  |
| C(4)   | 4636(3)  | 6114(2)  | 2620(2)   | 60(1)  |
| C(5)   | 3961(3)  | 6773(2)  | 1987(2)   | 65(1)  |
| C(6)   | 4715(3)  | 7760(2)  | 1756(2)   | 88(1)  |
| C(7)   | 4074(4)  | 8377(2)  | 1169(2)   | 102(1) |
| C(8)   | 2672(4)  | 8042(3)  | 801(2)    | 94(1)  |
| C(9)   | 1934(3)  | 7060(3)  | 1034(2)   | 98(1)  |
| C(10)  | 2559(3)  | 6434(2)  | 1618(2)   | 85(1)  |
| C(11)  | 1838(11) | 8631(8)  | 134(7)    | 101(3) |
| C(12)  | 2709(7)  | 9071(5)  | -716(5)   | 98(2)  |
| C(13)  | 1629(16) | 9899(11) | -1198(11) | 239(8) |
| C(14)  | 717(10)  | 9125(7)  | -1947(7)  | 141(3) |
| C(11') | 2221(19) | 8976(11) | 285(11)   | 110(6) |

|        |          |          |           |        |
|--------|----------|----------|-----------|--------|
| C(12') | 1942(16) | 8637(10) | -760(10)  | 149(5) |
| C(13') | 2038(10) | 9688(7)  | -1426(6)  | 78(2)  |
| C(14') | 508(16)  | 9485(17) | -1442(17) | 195(8) |
| C(15)  | 7617(2)  | 5013(2)  | 3062(2)   | 63(1)  |
| C(16)  | 7448(3)  | 4709(2)  | 2108(2)   | 87(1)  |
| C(17)  | 8414(5)  | 4232(3)  | 1708(3)   | 121(1) |
| C(18)  | 9553(5)  | 4073(3)  | 2277(5)   | 137(2) |
| C(19)  | 9723(4)  | 4375(3)  | 3214(4)   | 131(2) |
| C(20)  | 8769(3)  | 4848(2)  | 3616(2)   | 92(1)  |
| O(3)   | 4202(2)  | -3102(1) | 4833(1)   | 69(1)  |
| O(4)   | 4850(2)  | -1532(1) | 4225(1)   | 66(1)  |
| N(2)   | 6506(2)  | -2192(2) | 5110(1)   | 67(1)  |
| C(21)  | 5171(2)  | -2322(2) | 4748(2)   | 59(1)  |
| C(22)  | 7727(2)  | -1294(2) | 5022(2)   | 67(1)  |
| C(23)  | 7215(3)  | -478(2)  | 4480(2)   | 71(1)  |
| C(24)  | 5889(2)  | -601(2)  | 4117(2)   | 60(1)  |
| C(25)  | 5293(3)  | 151(2)   | 3561(2)   | 61(1)  |
| C(26)  | 6120(3)  | 1151(2)  | 3414(2)   | 78(1)  |
| C(27)  | 5580(3)  | 1857(2)  | 2886(2)   | 86(1)  |
| C(28)  | 4197(4)  | 1603(2)  | 2487(2)   | 84(1)  |
| C(29)  | 3369(3)  | 611(2)   | 2639(2)   | 89(1)  |
| C(30)  | 3895(3)  | -106(2)  | 3167(2)   | 81(1)  |
| C(31)  | 3687(15) | 2452(11) | 1957(8)   | 88(3)  |
| C(32)  | 3466(9)  | 2214(7)  | 878(7)    | 121(3) |
| C(33)  | 3693(11) | 3422(10) | 302(8)    | 159(3) |
| C(34)  | 2226(10) | 3184(10) | -20(9)    | 206(5) |
| C(31') | 3430(20) | 2271(18) | 1825(13)  | 121(9) |
| C(32') | 4208(10) | 2559(8)  | 892(8)    | 85(3)  |
| C(33') | 2740(15) | 2903(8)  | 320(9)    | 129(4) |
| C(34') | 3310(20) | 4016(9)  | 406(12)   | 182(6) |
| C(35)  | 8917(2)  | -1661(2) | 4568(2)   | 66(1)  |
| C(36)  | 9794(3)  | -2136(2) | 5128(2)   | 80(1)  |
| C(37)  | 10837(3) | -2528(2) | 4724(3)   | 96(1)  |
| C(38)  | 11007(3) | -2447(2) | 3761(3)   | 105(1) |
| C(39)  | 10149(4) | -1980(3) | 3200(3)   | 111(1) |
| C(40)  | 9105(3)  | -1583(2) | 3595(2)   | 90(1)  |

---

III. Copies of  $^1\text{H}$  NMR,  $^{13}\text{C}$  NMR and  $^{19}\text{F}$  NMR Spectrum



NMR spectra of compound 1a

7.428  
7.425  
7.407  
7.377  
7.373  
7.368  
7.356  
7.352  
7.337  
7.329  
7.325  
7.321  
7.315  
7.308  
7.299  
7.293  
7.290  
7.286

5.834  
5.809

5.168  
5.150

3.444

1.478

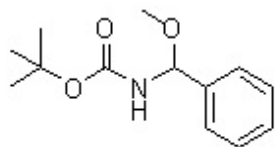

(<sup>1</sup>H NMR, 400 MHz, CDCl<sub>3</sub>)

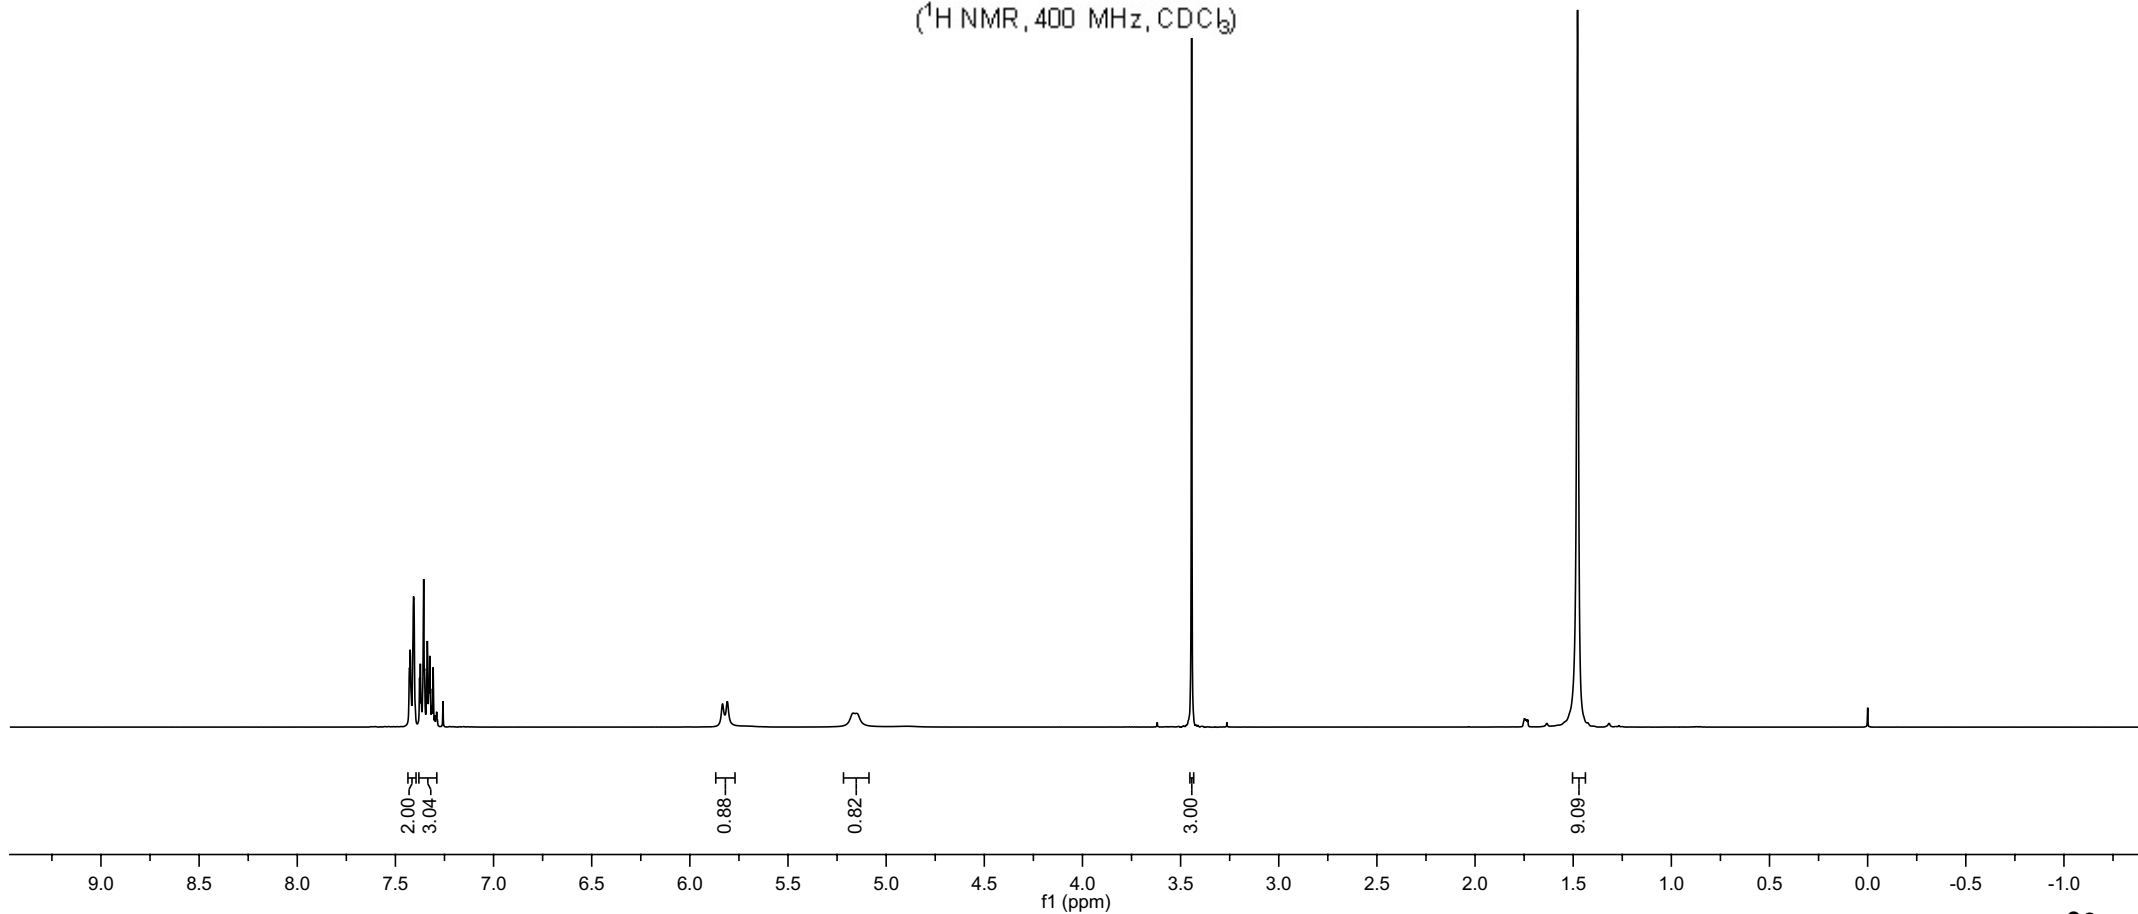

NMR spectra of compound **1b**

7.306  
7.286  
7.170  
7.150

5.791  
5.768

5.136  
5.117

3.426

2.339

1.473

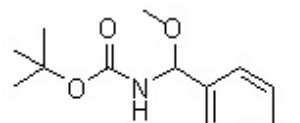

(<sup>1</sup>H NMR, 400 MHz, CDCl<sub>3</sub>)

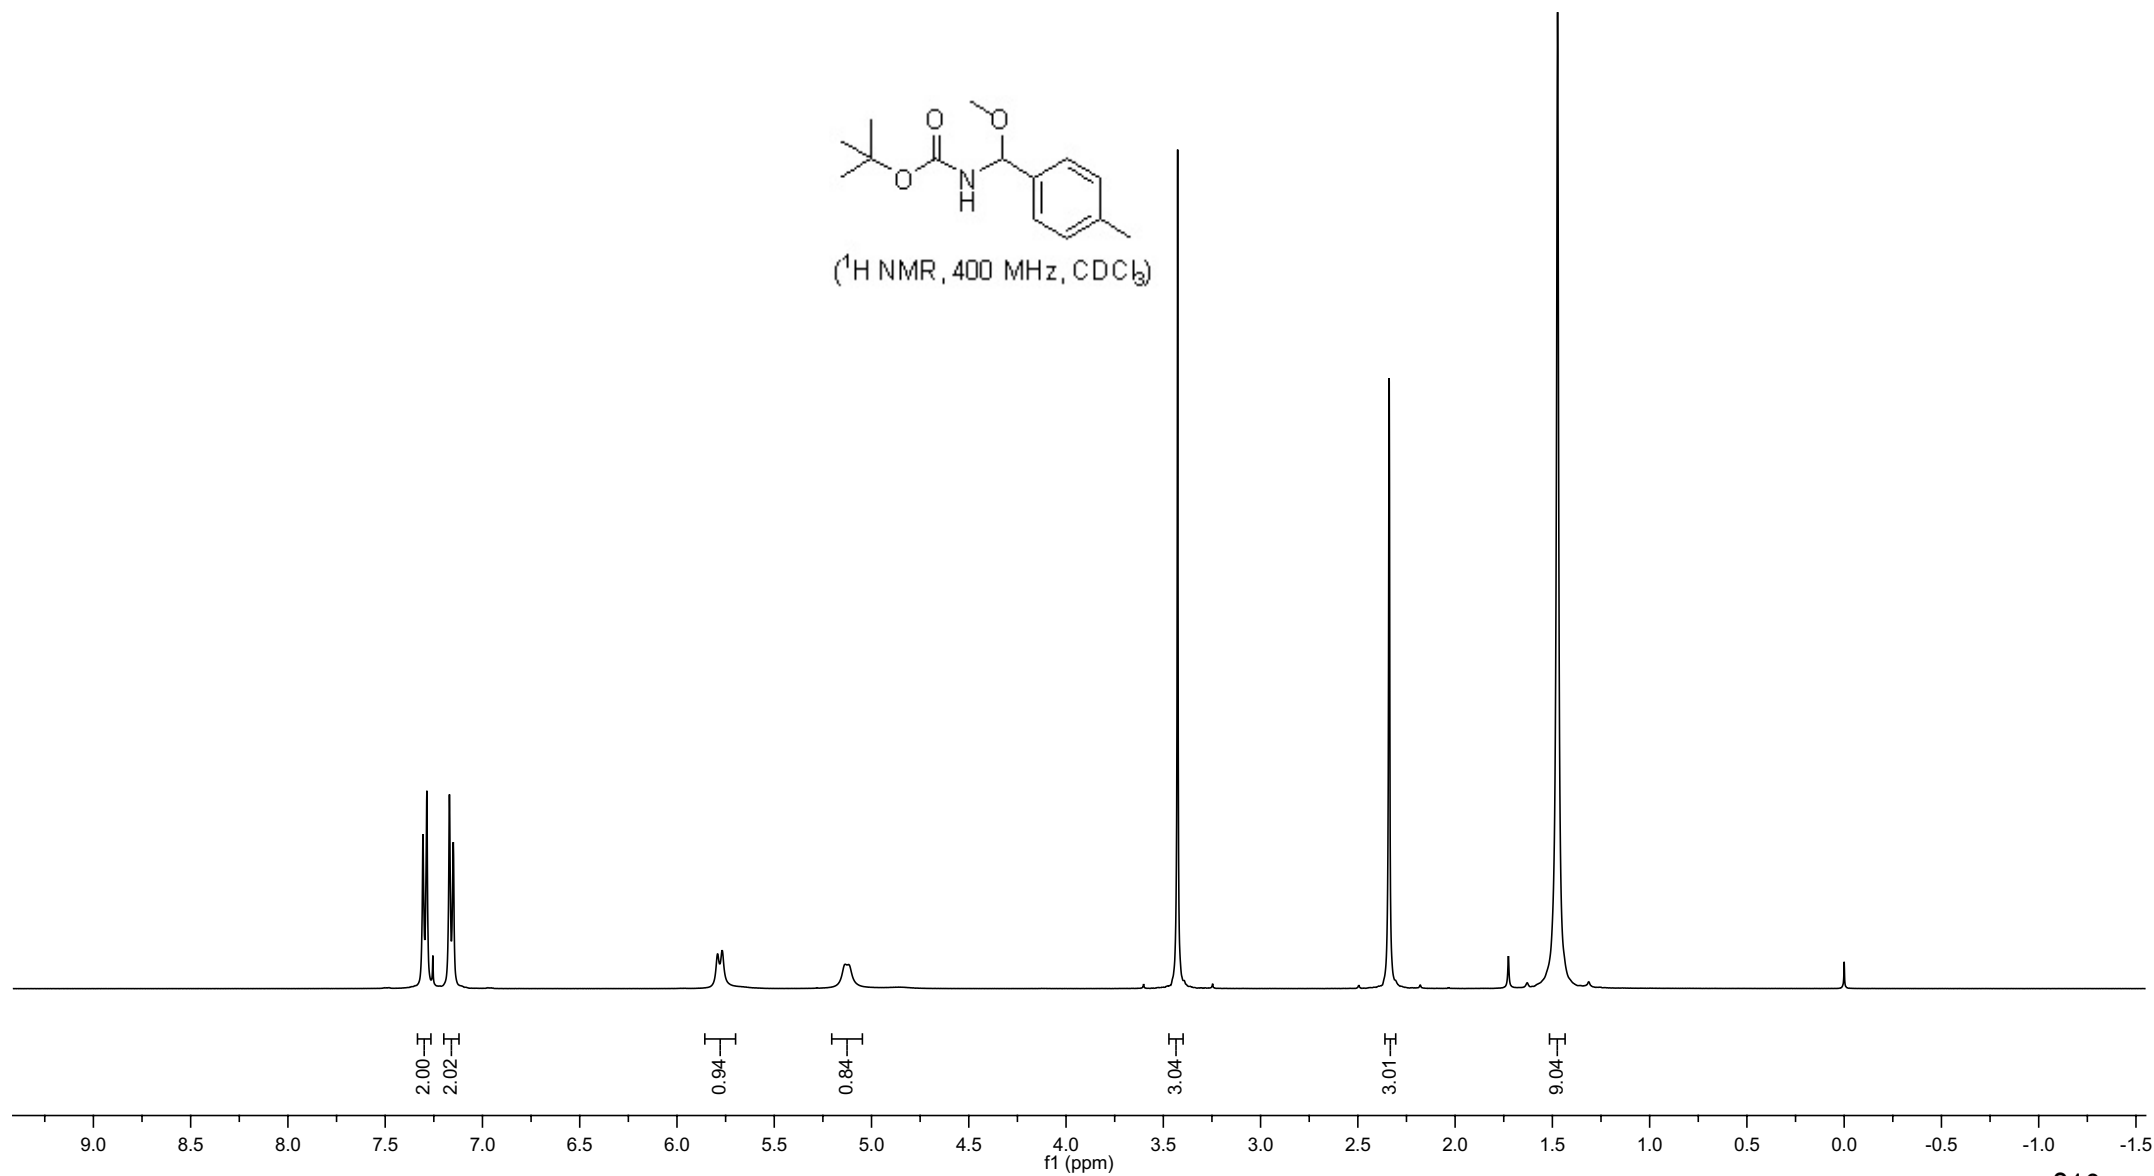

NMR spectra of compound 1c

7.398  
7.393  
7.382  
7.376  
7.352  
7.331

5.802  
5.778

5.119  
5.100

3.441

1.587  
1.473  
1.311

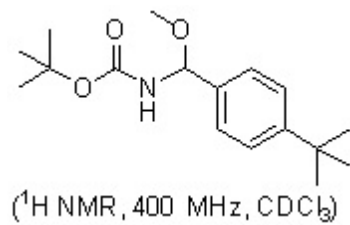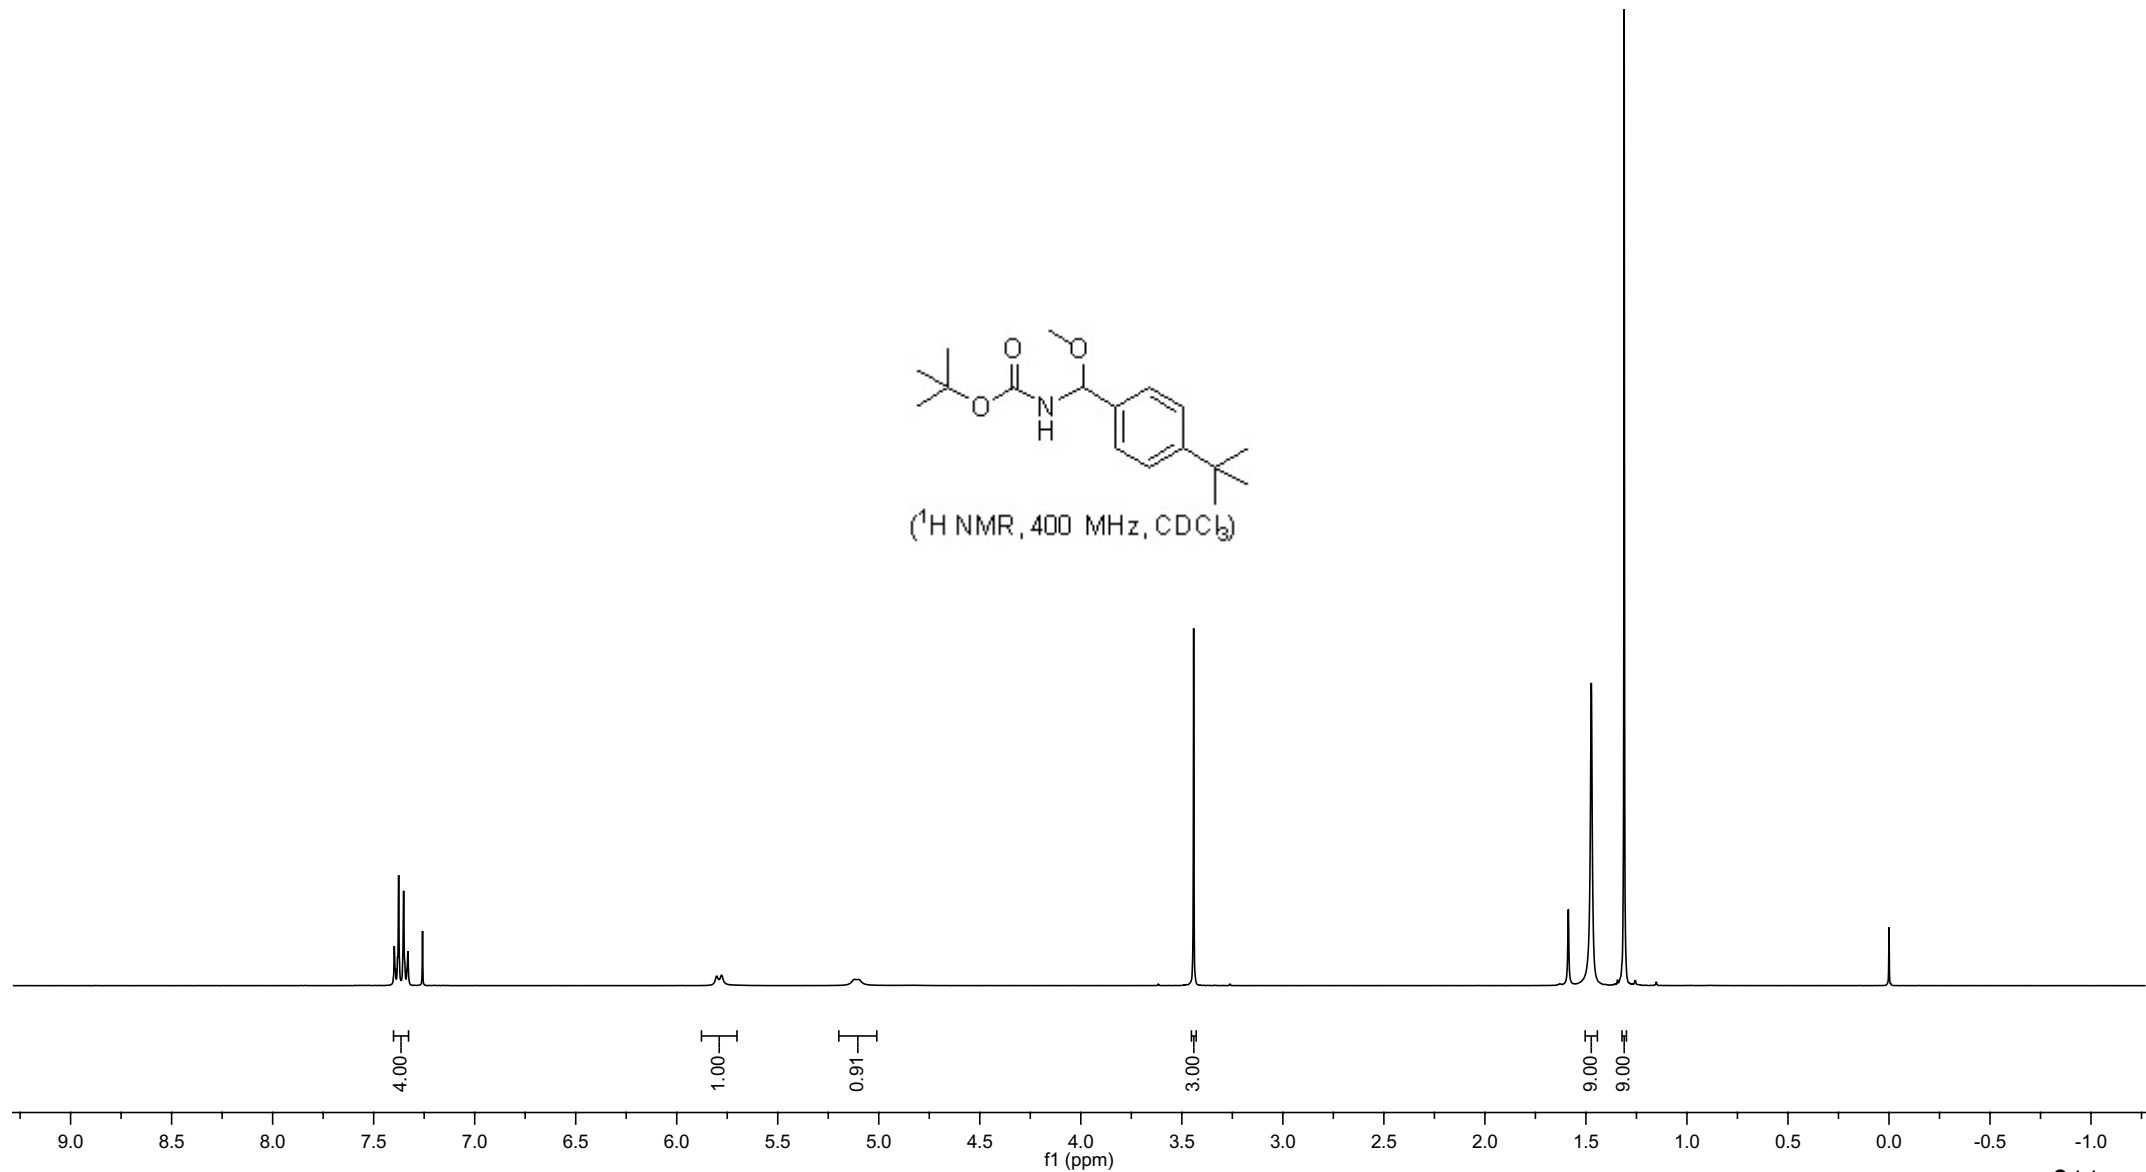

NMR spectra of compound 1c

- 155.382
- 151.585
- 136.663
- 125.709
- 125.604
- 83.612
- 80.119
- 55.669
- 34.703
- 31.433
- 28.457

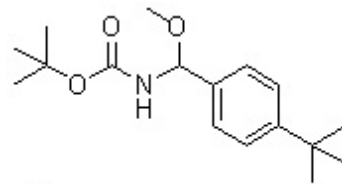

(<sup>13</sup>C NMR, 100 MHz, CDCl<sub>3</sub>)

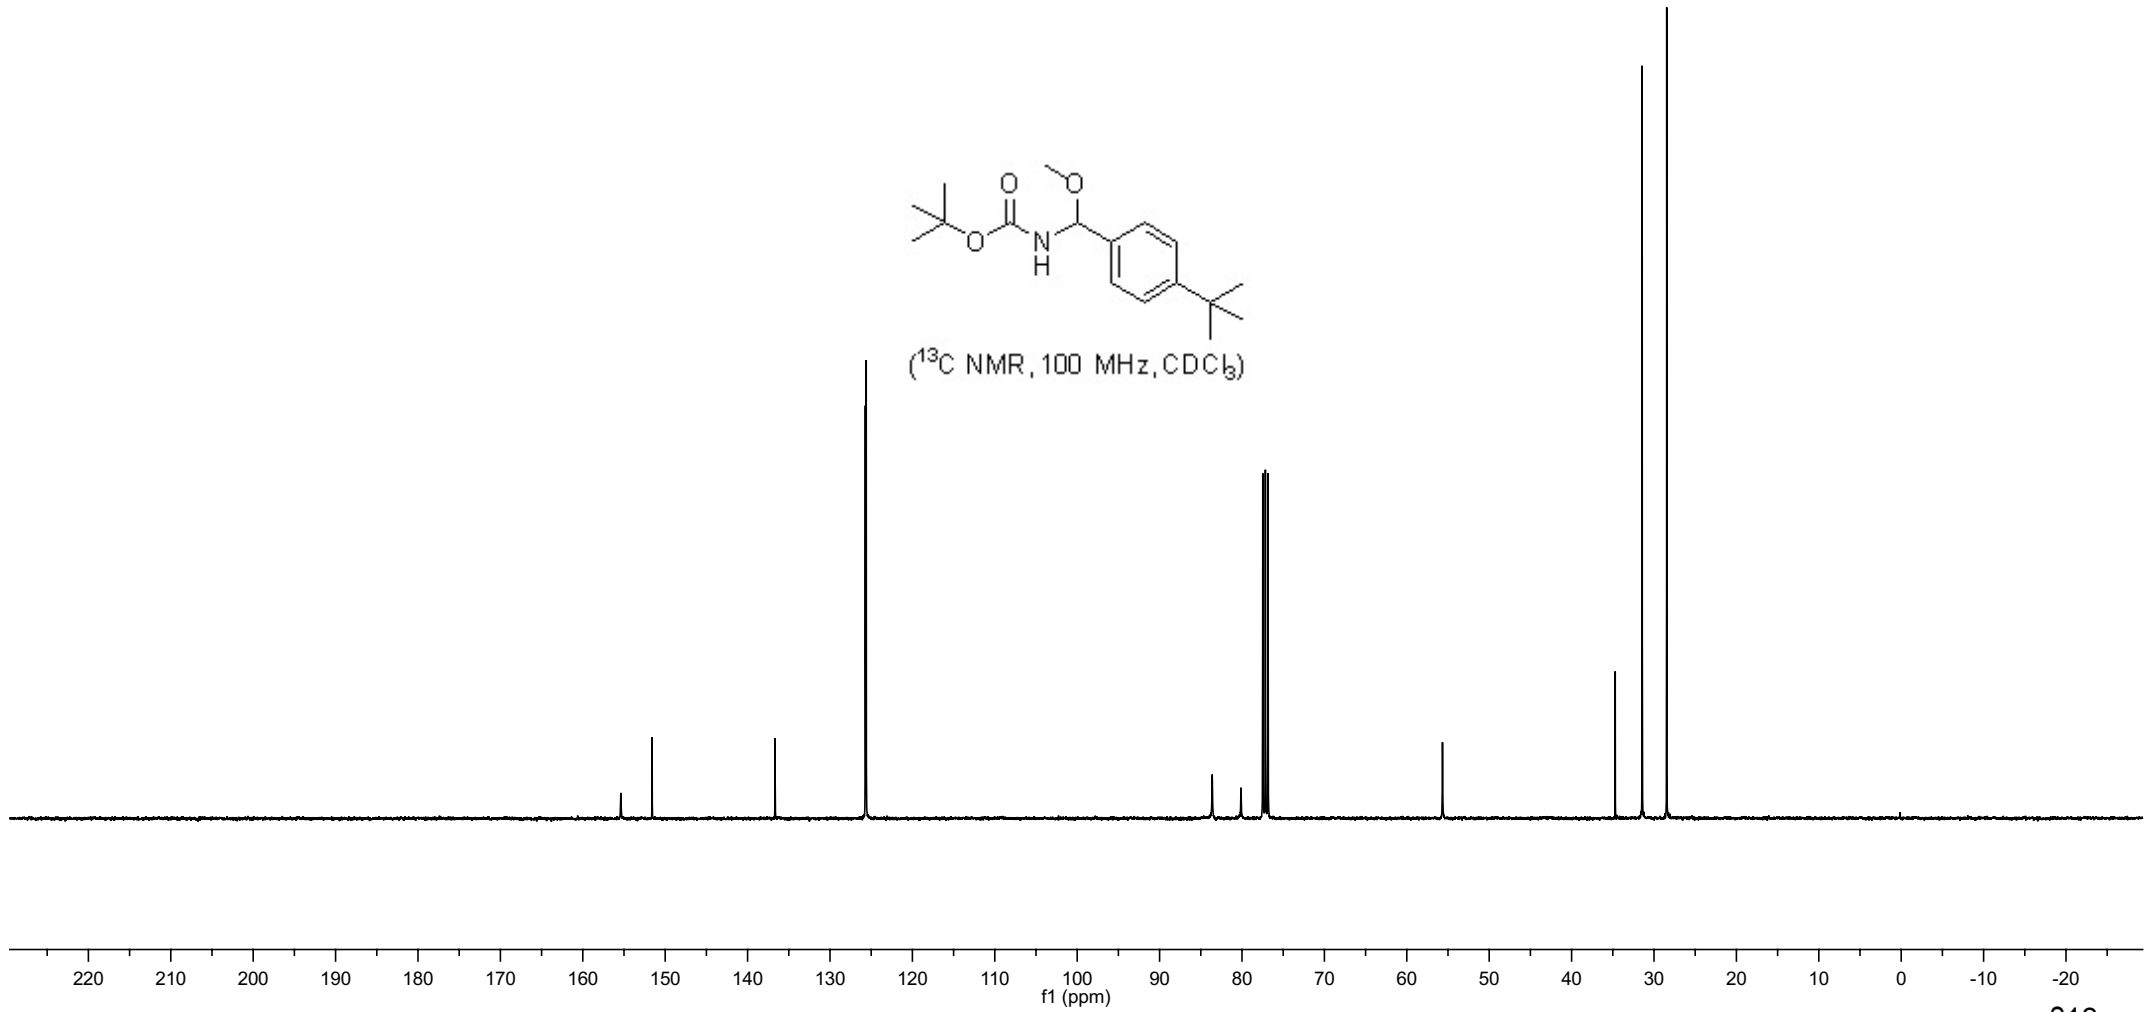

NMR spectra of compound 1d

7.344  
7.323

6.888  
6.866

5.782  
5.758

5.167  
5.147

3.794

3.421

1.474

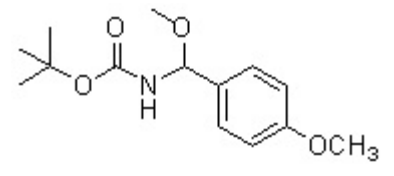

(<sup>1</sup>H NMR, 400 MHz, CDCl<sub>3</sub>)

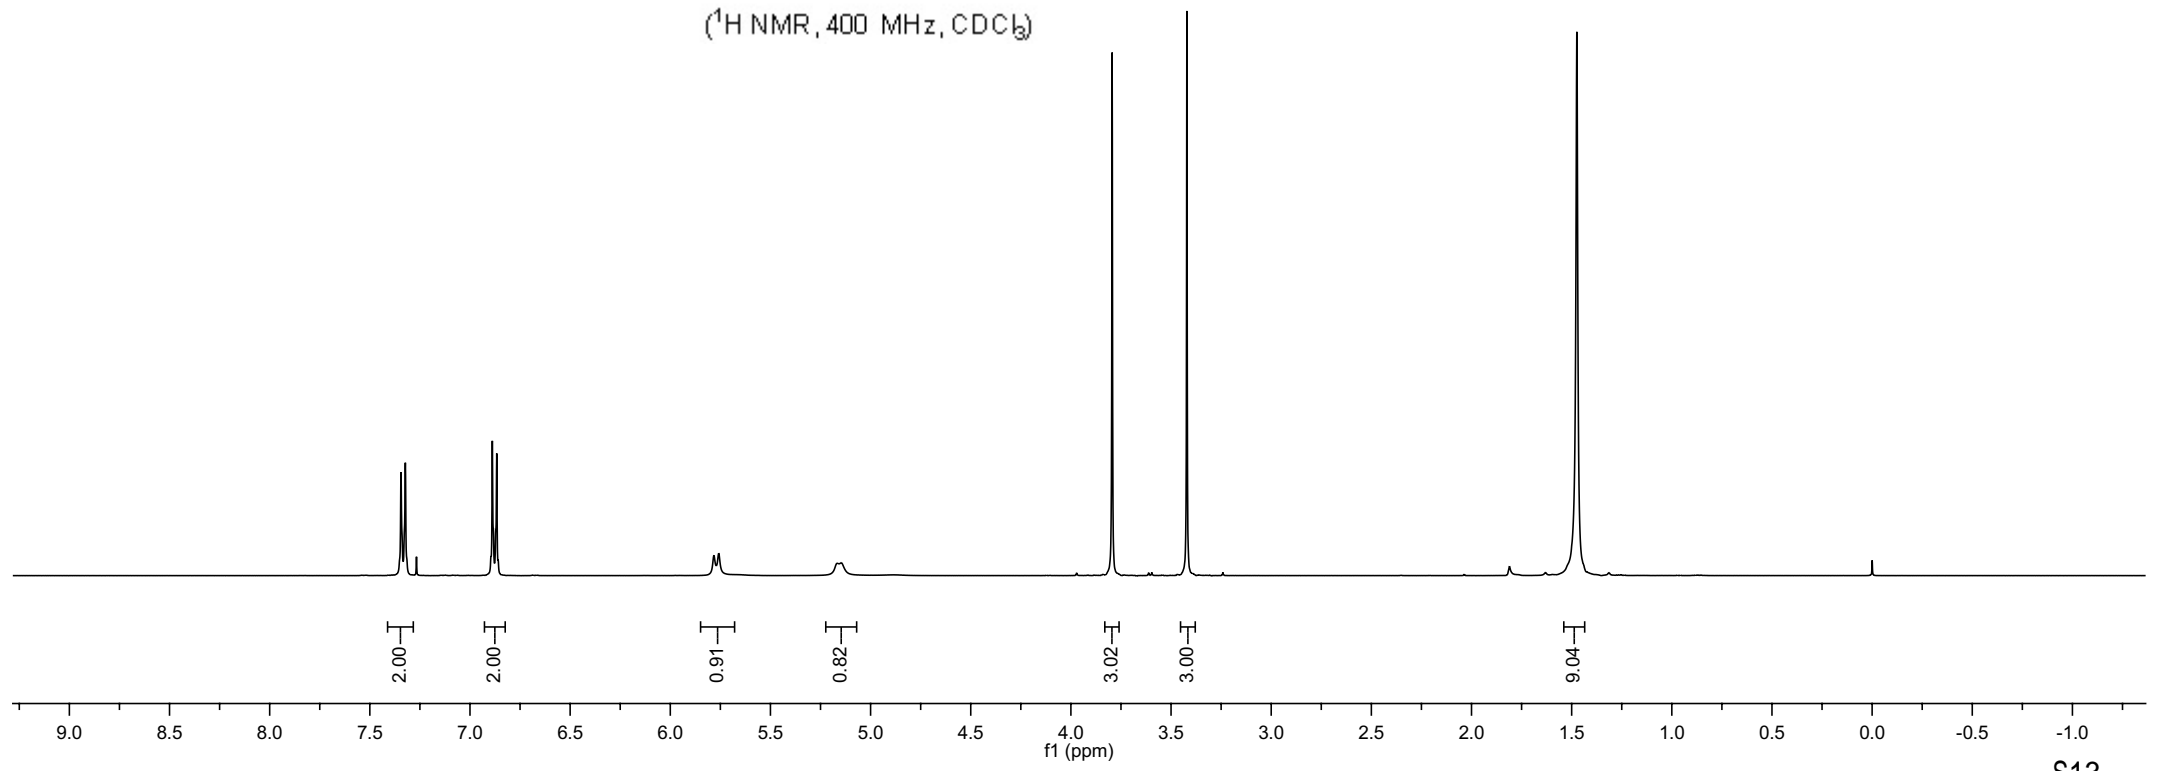

NMR spectra of compound 1e

7.487  
7.470  
7.465  
7.306  
7.284

5.802  
5.778

5.113  
5.092

3.441

1.479

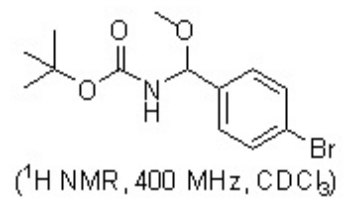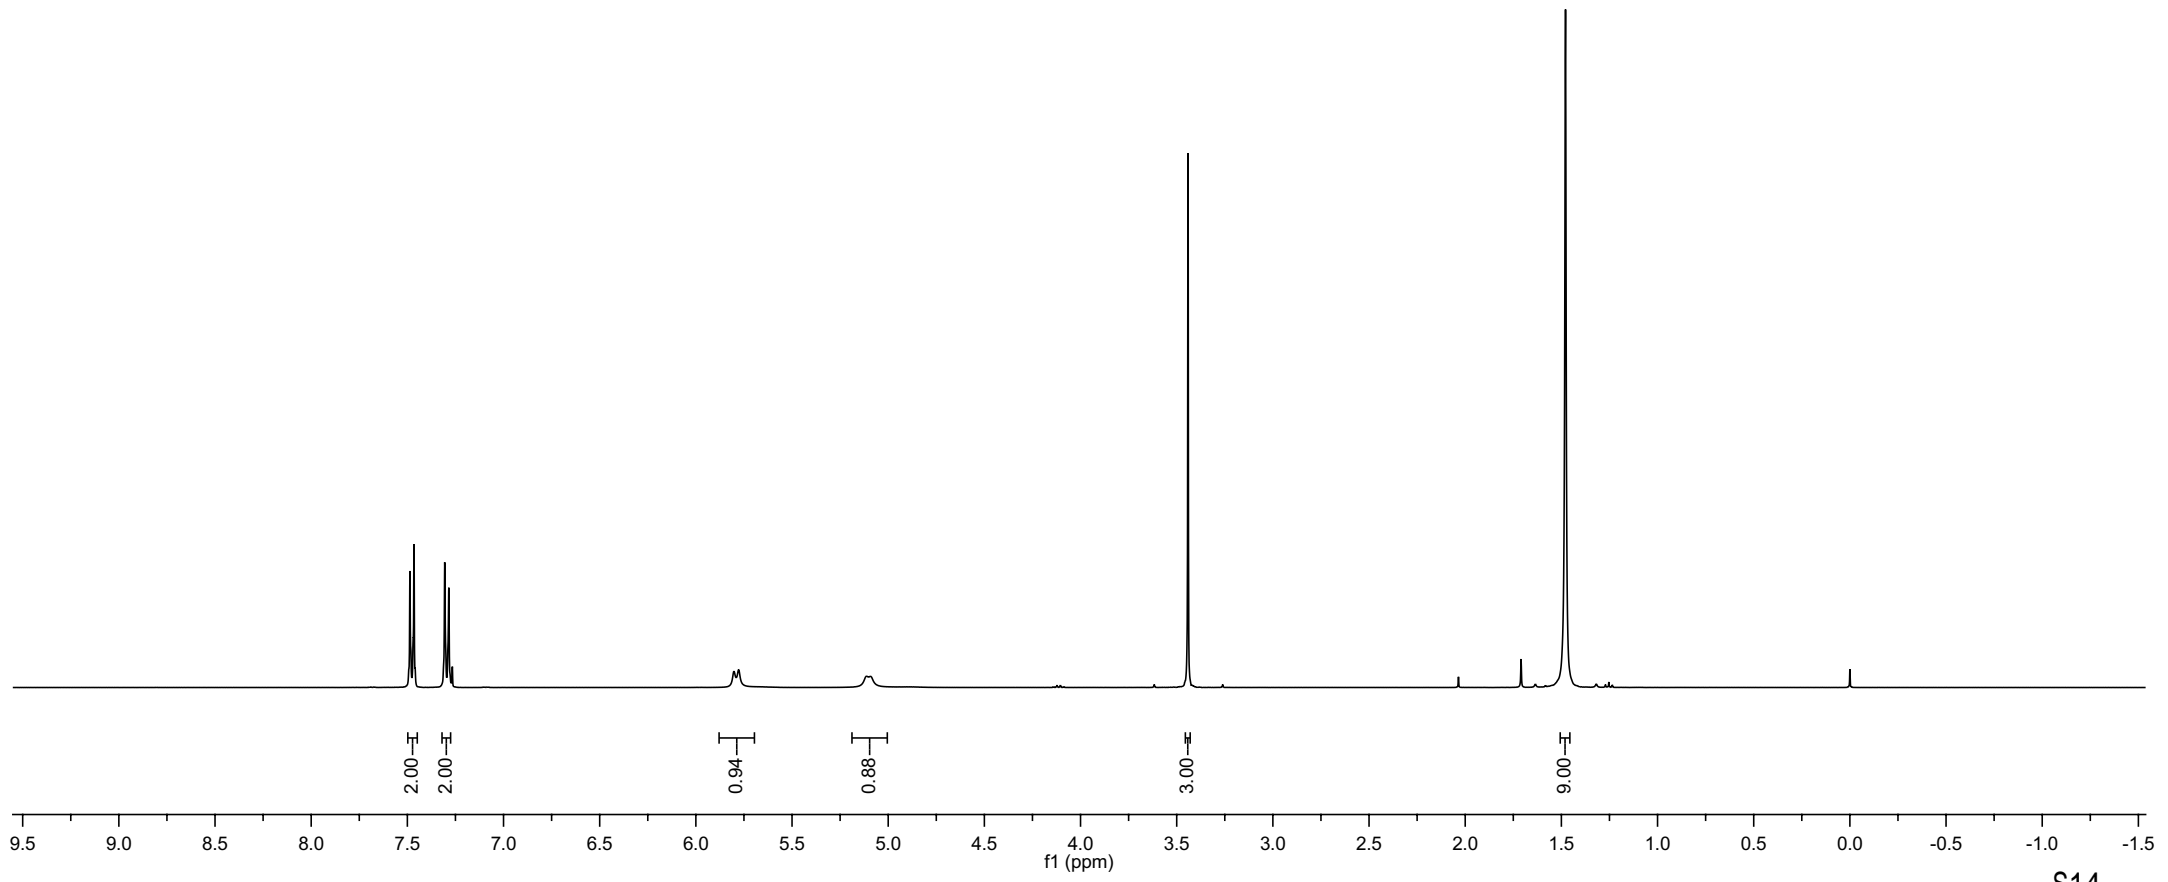

NMR spectra of compound 1f

7.629  
7.608  
7.563  
7.543

5.906  
5.881

5.115  
5.094

3.478

1.488

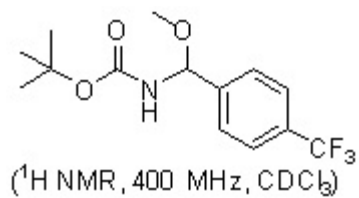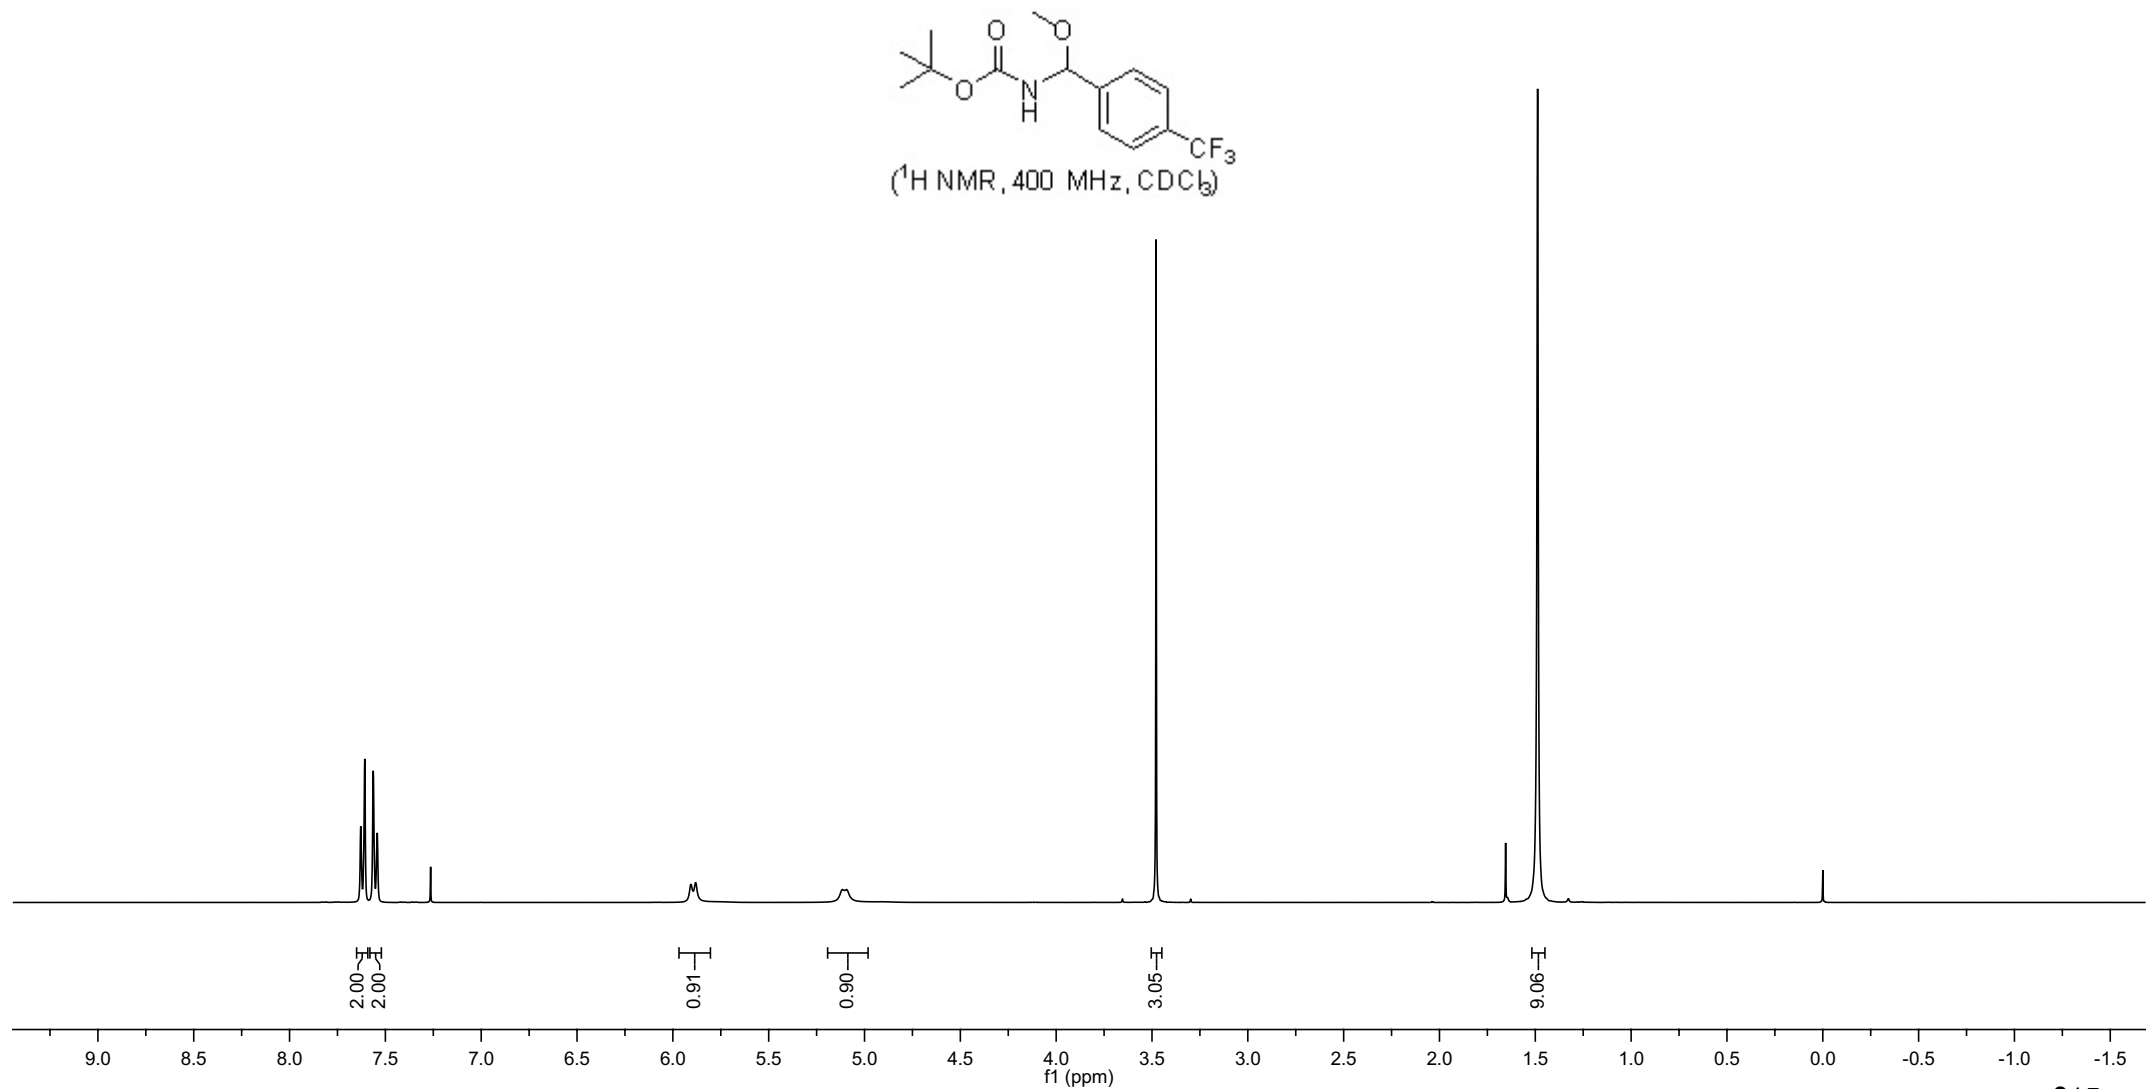

NMR spectra of compound 1g

7.664  
7.643  
7.567  
7.546

5.904  
5.880

5.091  
5.069

3.484

1.489

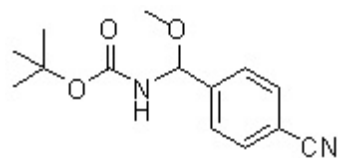

(<sup>1</sup>H NMR, 400 MHz, CDCl<sub>3</sub>)

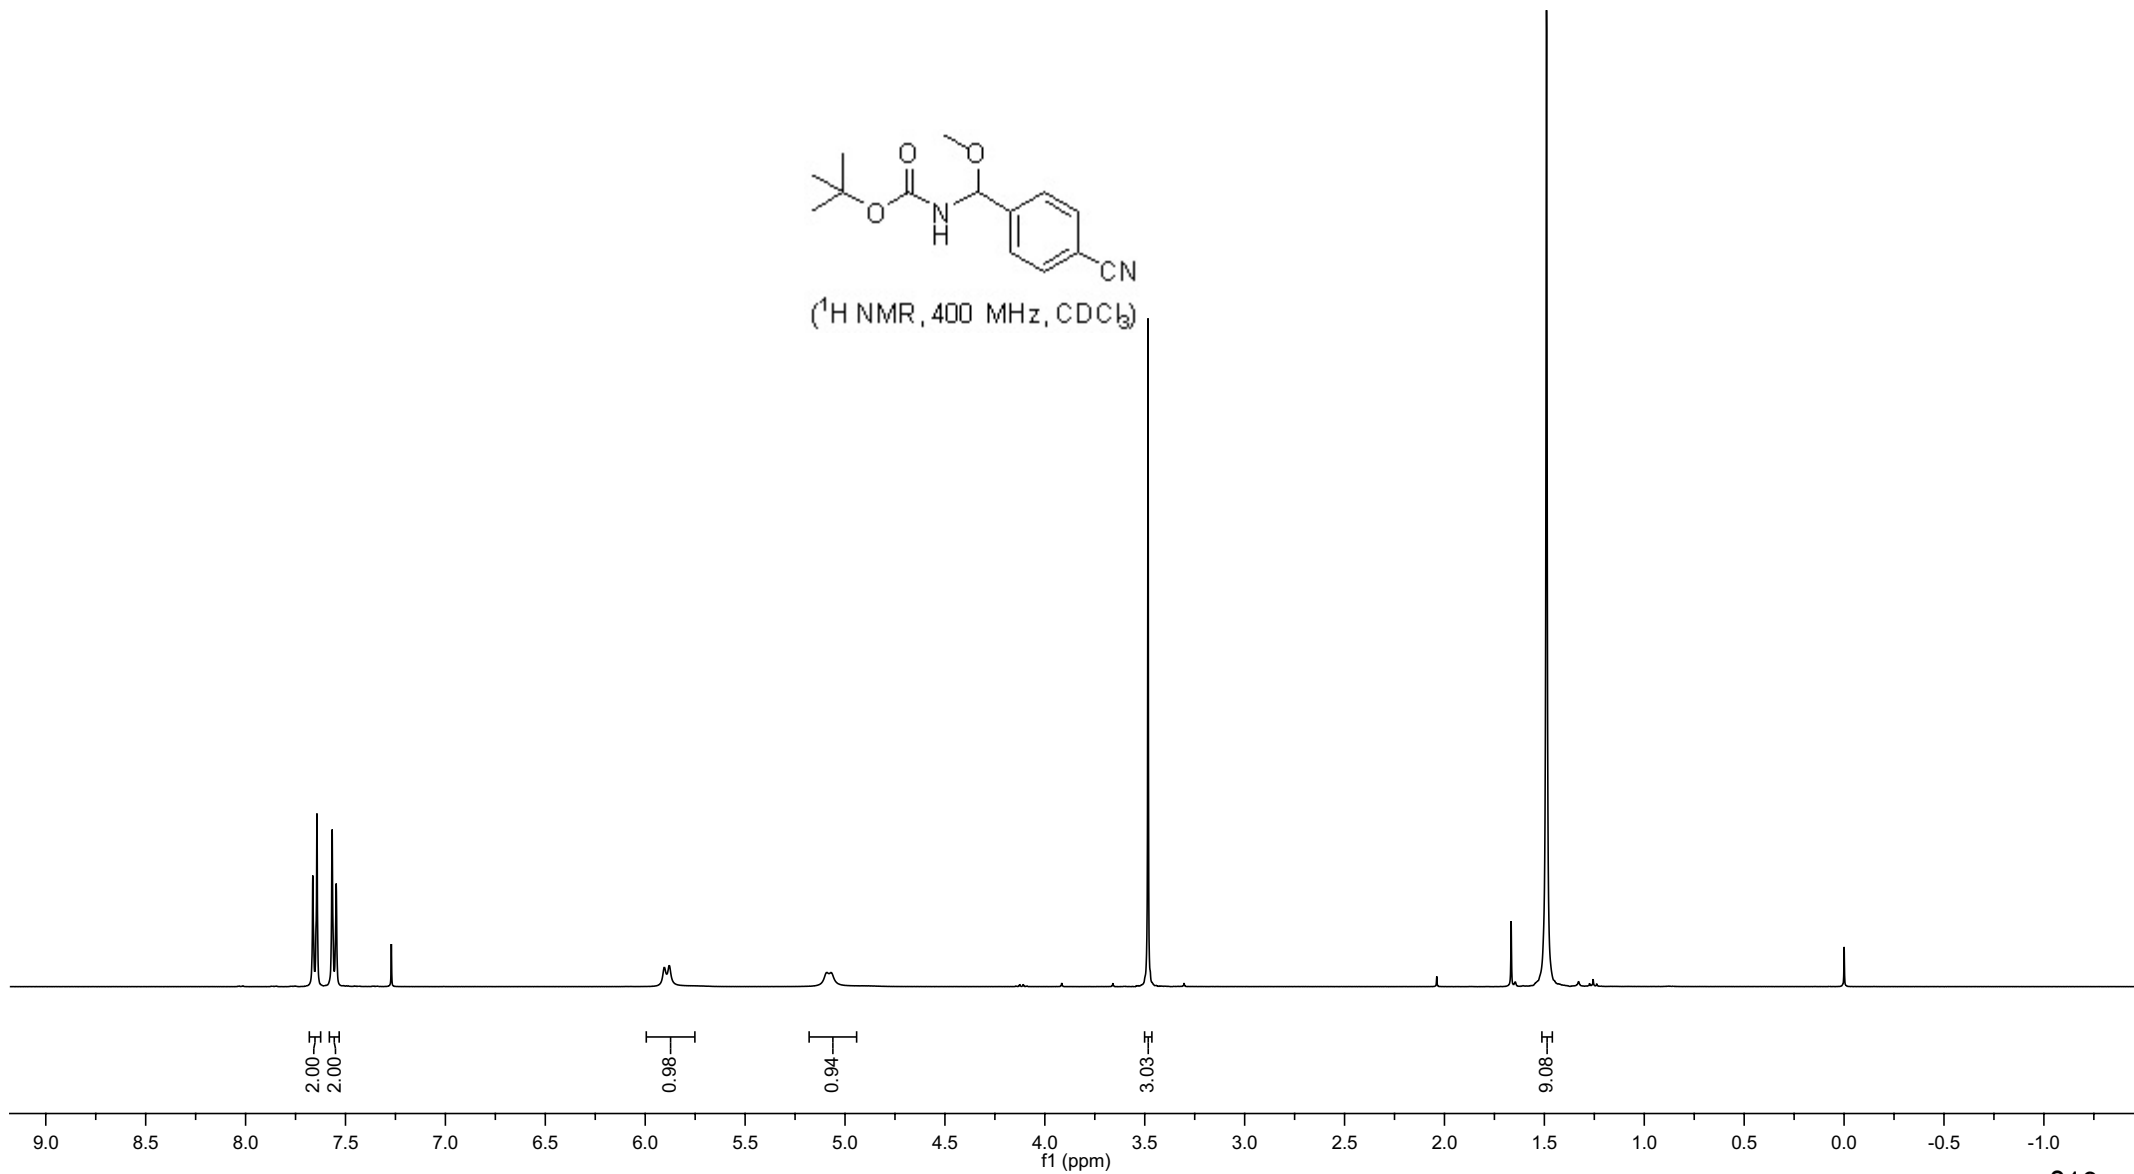



NMR spectra of compound 1h

7.263  
7.255  
7.244  
7.226  
7.210  
7.191  
7.131  
7.114

5.788  
5.764

5.135

3.438

2.351

1.477

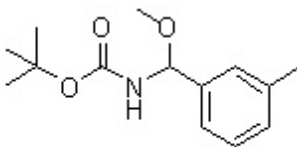

(<sup>1</sup>H NMR, 400 MHz, CDCl<sub>3</sub>)

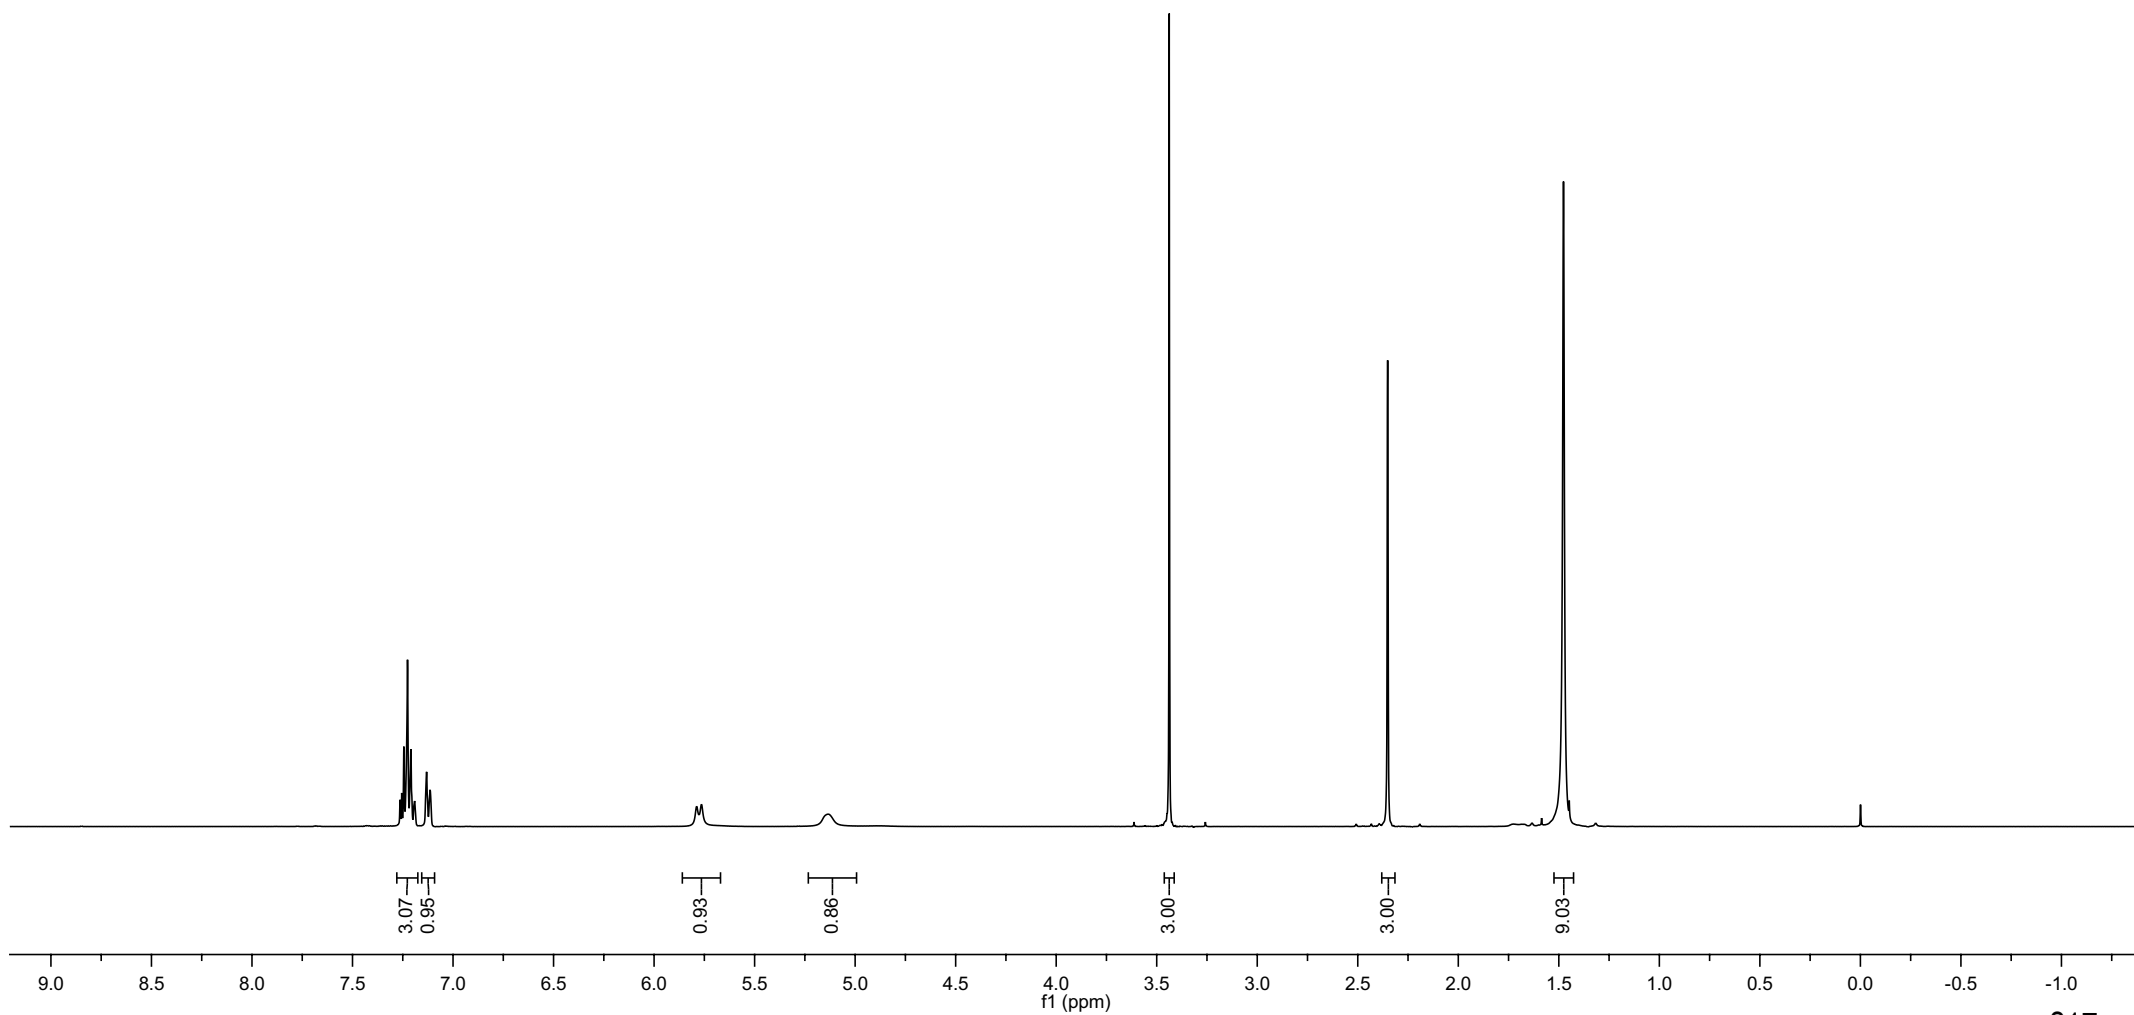

NMR spectra of compound **1h**

— 155.387

— 139.535  
— 138.426

— 129.274  
— 128.611  
— 126.637  
— 123.040

— 83.763  
— 80.180

— 55.644

— 28.449

— 21.522

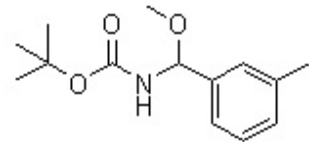

(<sup>13</sup>C NMR, 100 MHz, CDCl<sub>3</sub>)

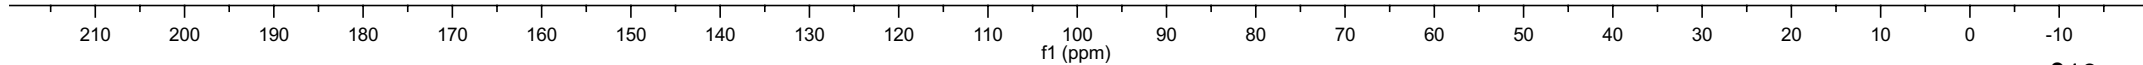

NMR spectra of compound 1i

7.432  
7.299  
7.285  
7.283  
7.271  
7.267

5.818  
5.794

5.161  
5.140

3.448

1.483

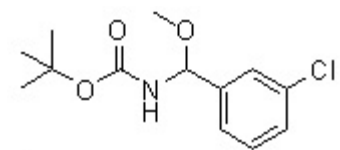

(<sup>1</sup>H NMR, 400MHz, CDCl<sub>3</sub>)

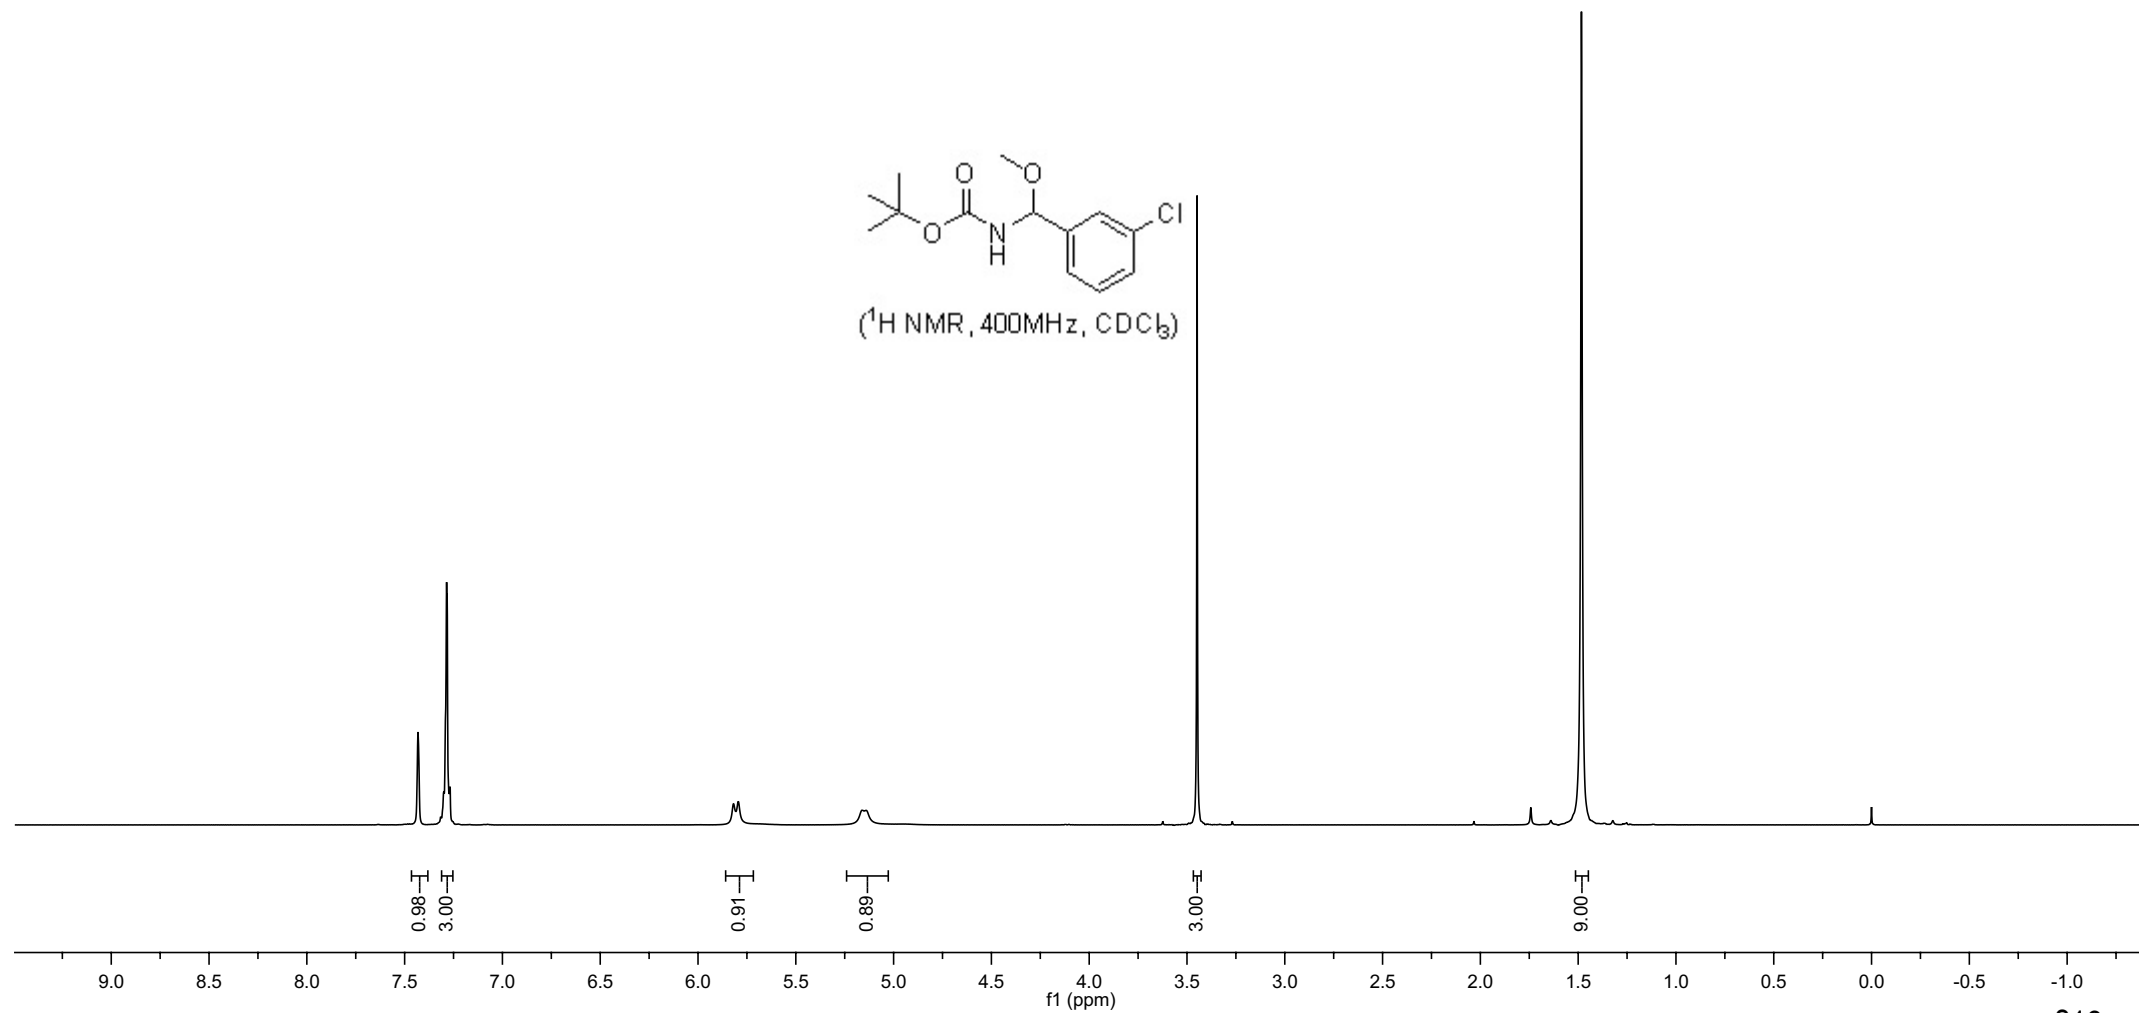

NMR spectra of compound 1i

— 155.365  
— 141.681  
— 134.582  
— 129.904  
— 128.617  
— 126.367  
— 124.327  
  
— 82.888  
— 80.458  
  
— 55.745  
  
— 28.409

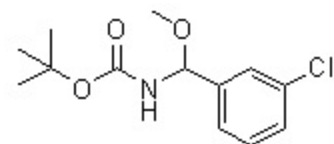

(<sup>13</sup>C NMR, 100MHz, CDCl<sub>3</sub>)

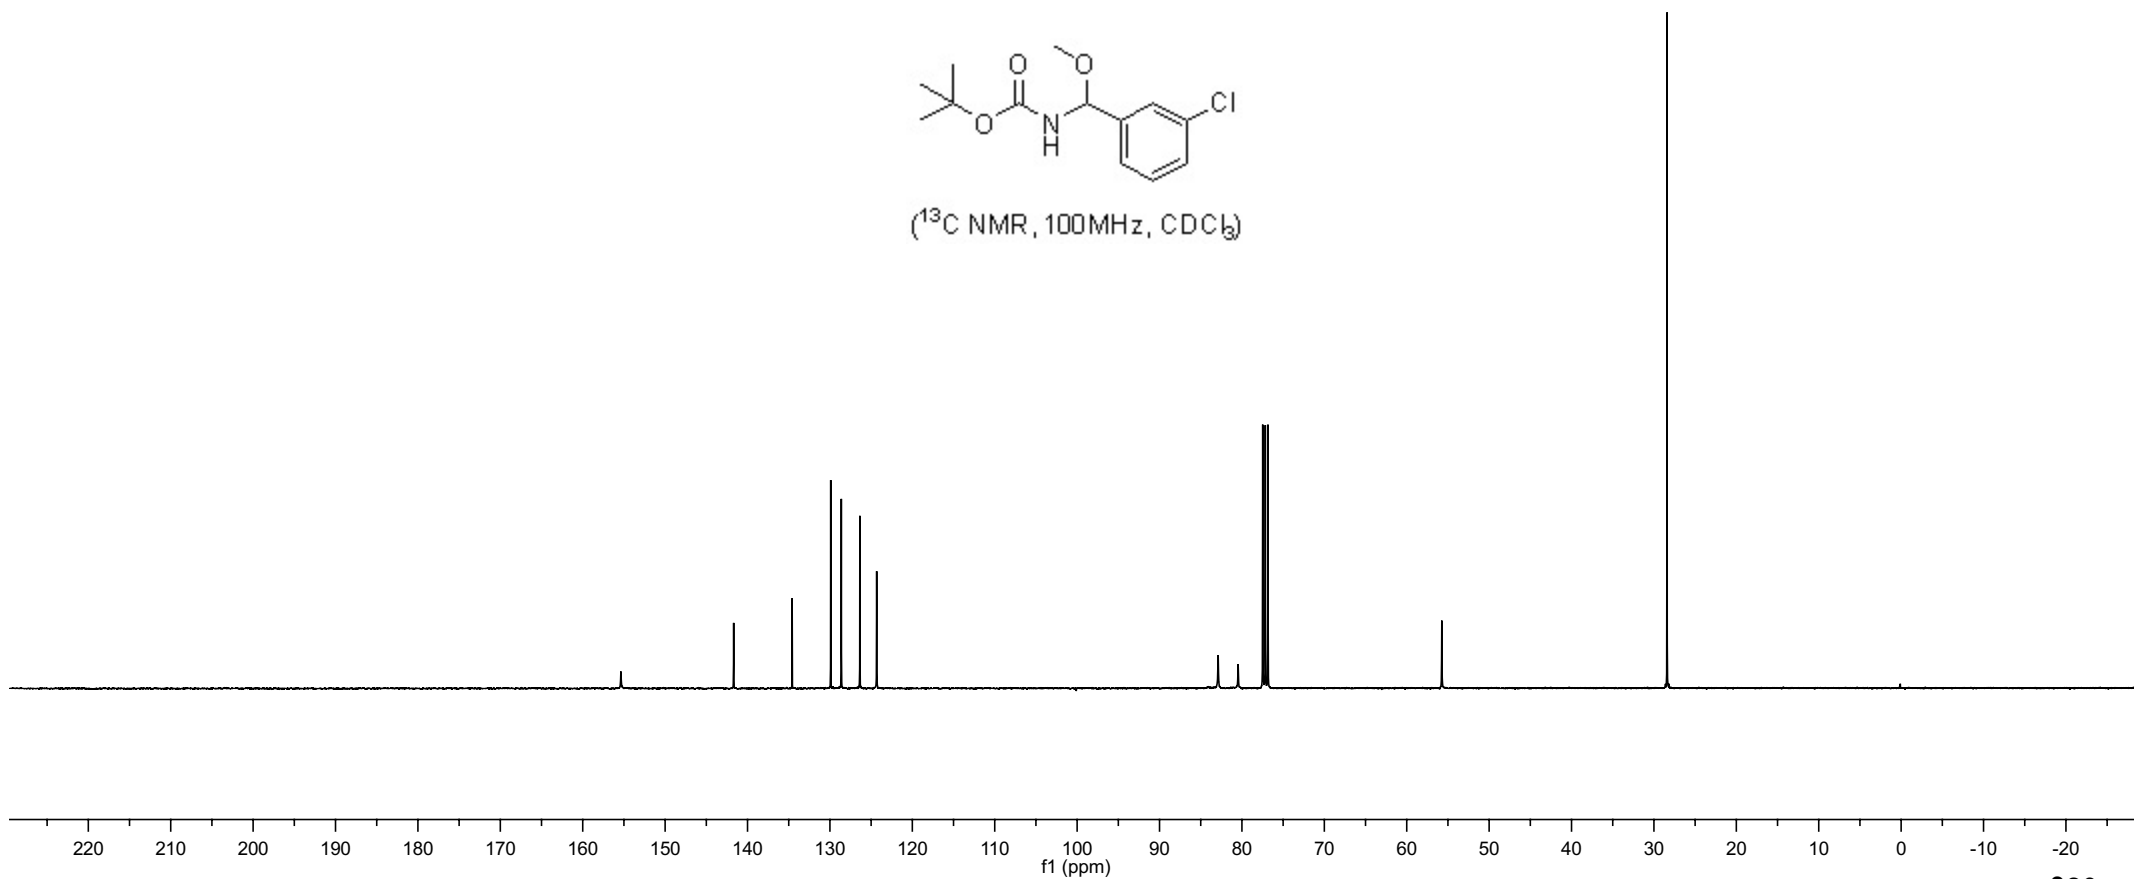

NMR spectra of compound 1j

7.591  
7.452  
7.432  
7.356  
7.337  
7.241  
7.222  
7.202

5.815  
5.790

5.120  
5.106

3.451

1.485

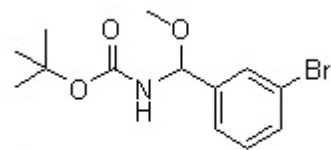

(<sup>1</sup>H NMR, 400MHz, CDCl<sub>3</sub>)

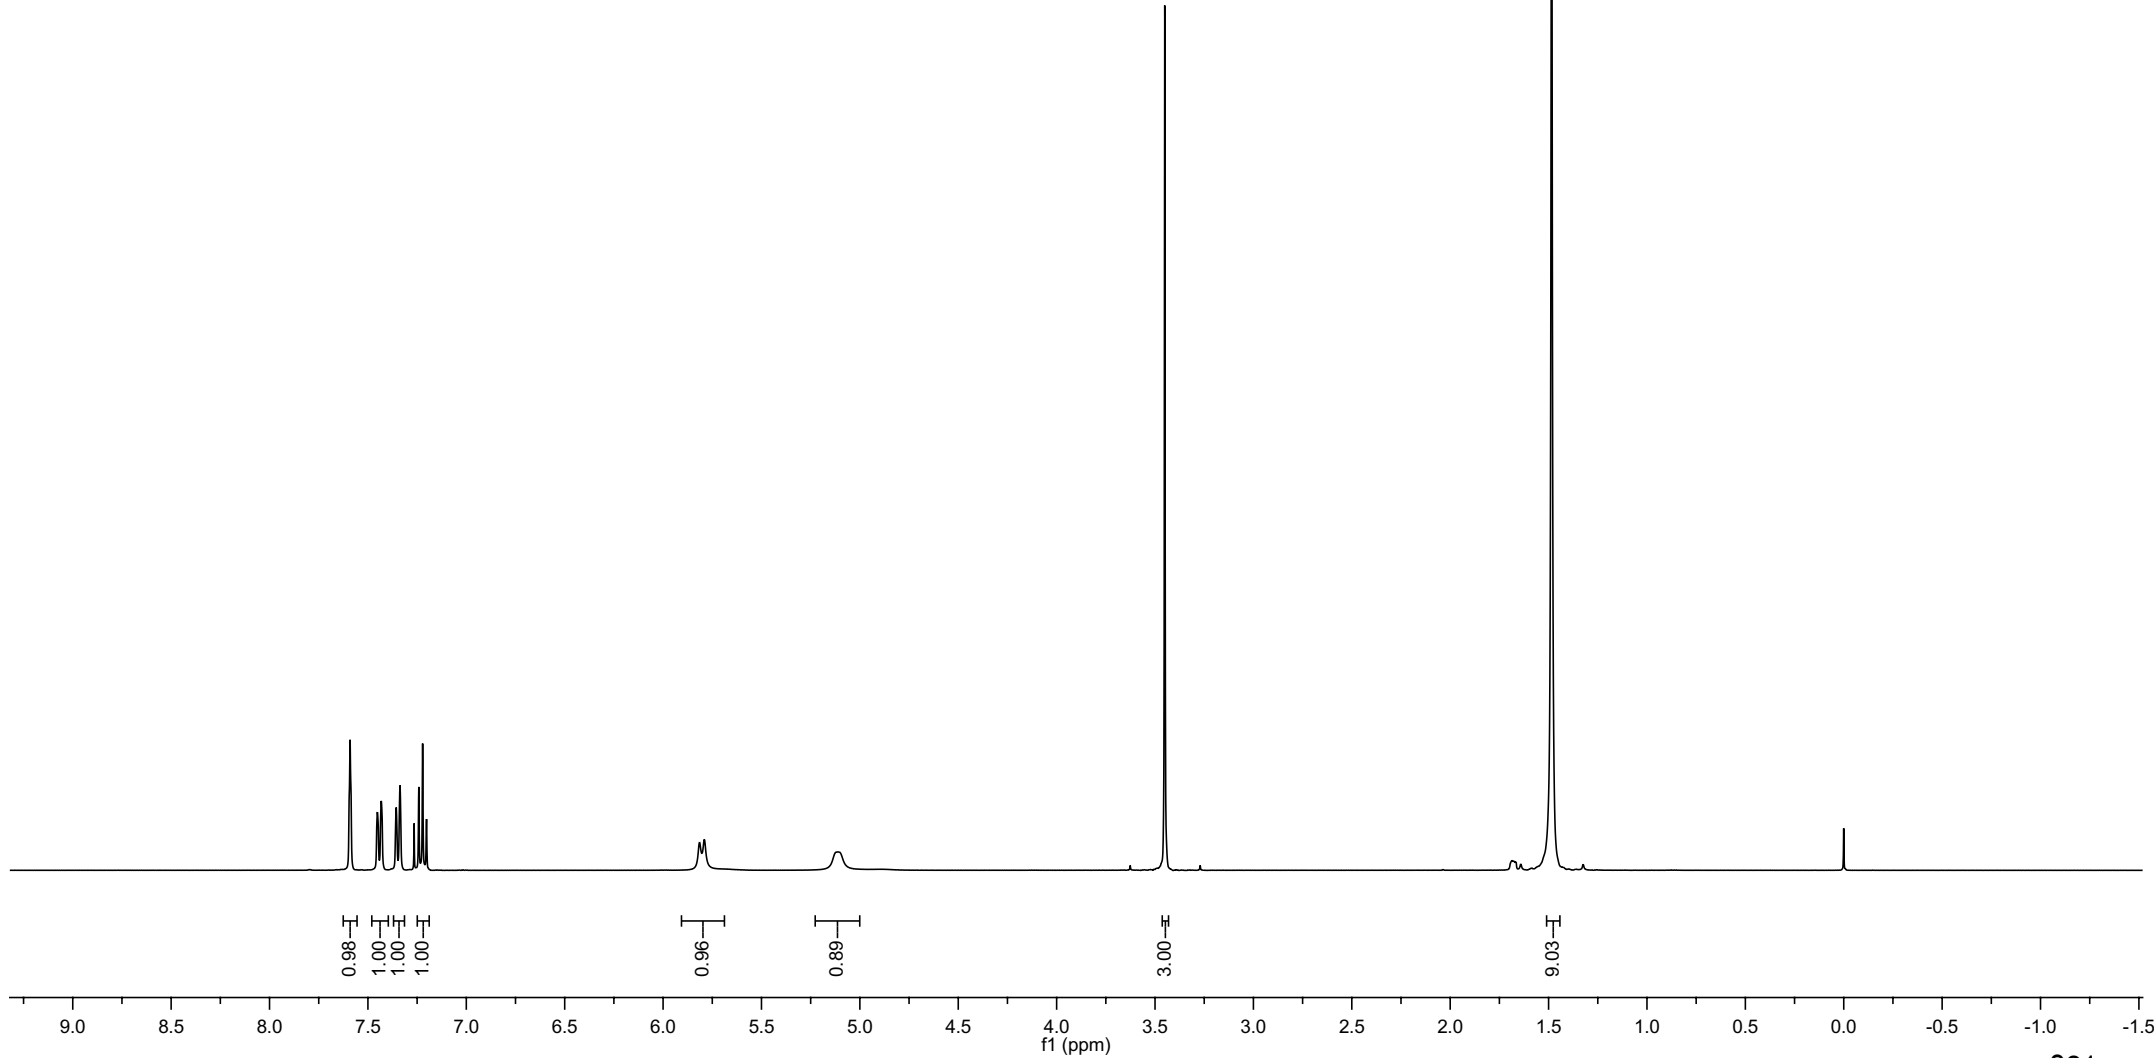

NMR spectra of compound **1j**

— 155.348  
— 141.926  
— 131.591  
— 130.211  
— 129.282  
— 124.813  
— 122.754  
  
— 82.838  
— 80.496  
  
— 55.781  
  
— 28.429

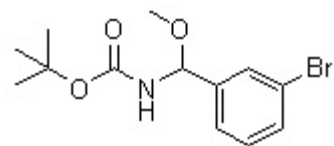

(<sup>13</sup>C NMR, 100MHz, CDCl<sub>3</sub>)

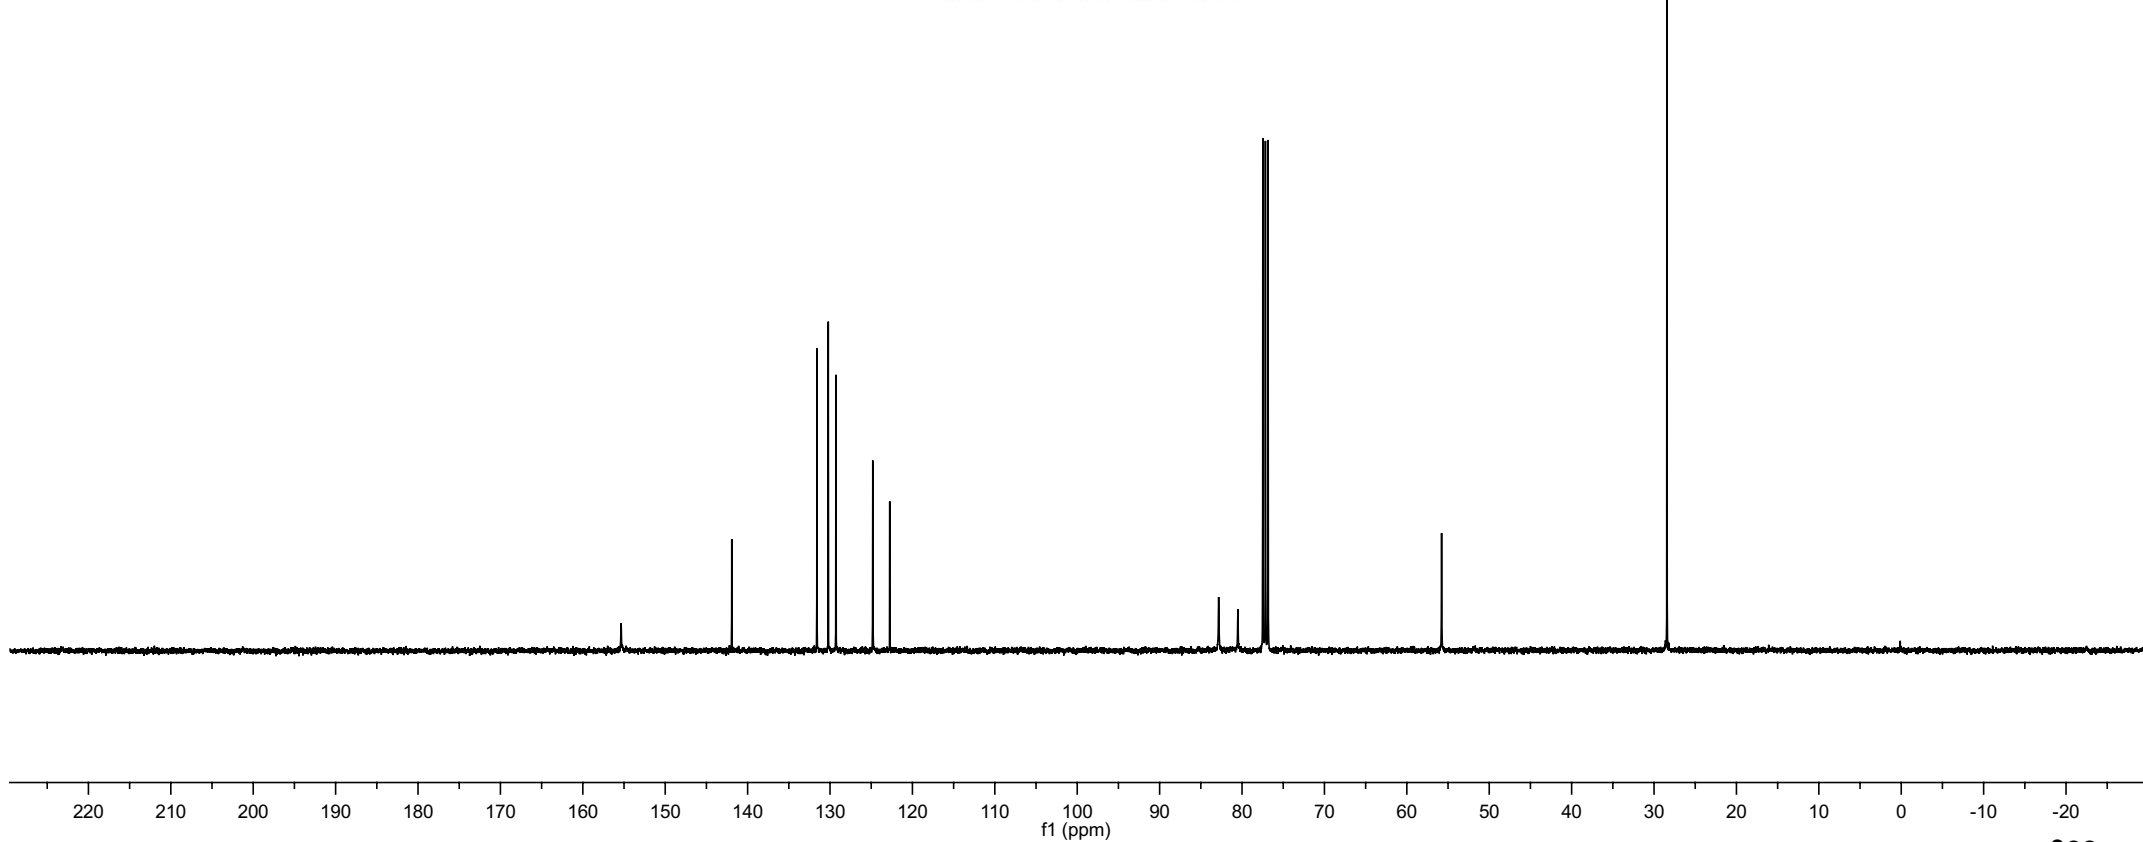

NMR spectra of compound 1k

7.492  
7.478  
7.469  
7.217  
7.206  
7.197  
7.194  
7.181  
7.168  
7.158  
7.145

5.930  
5.906

5.073  
5.052

3.440

2.333

1.464

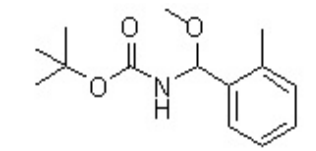

(<sup>1</sup>H NMR, 400 MHz, CDCl<sub>3</sub>)

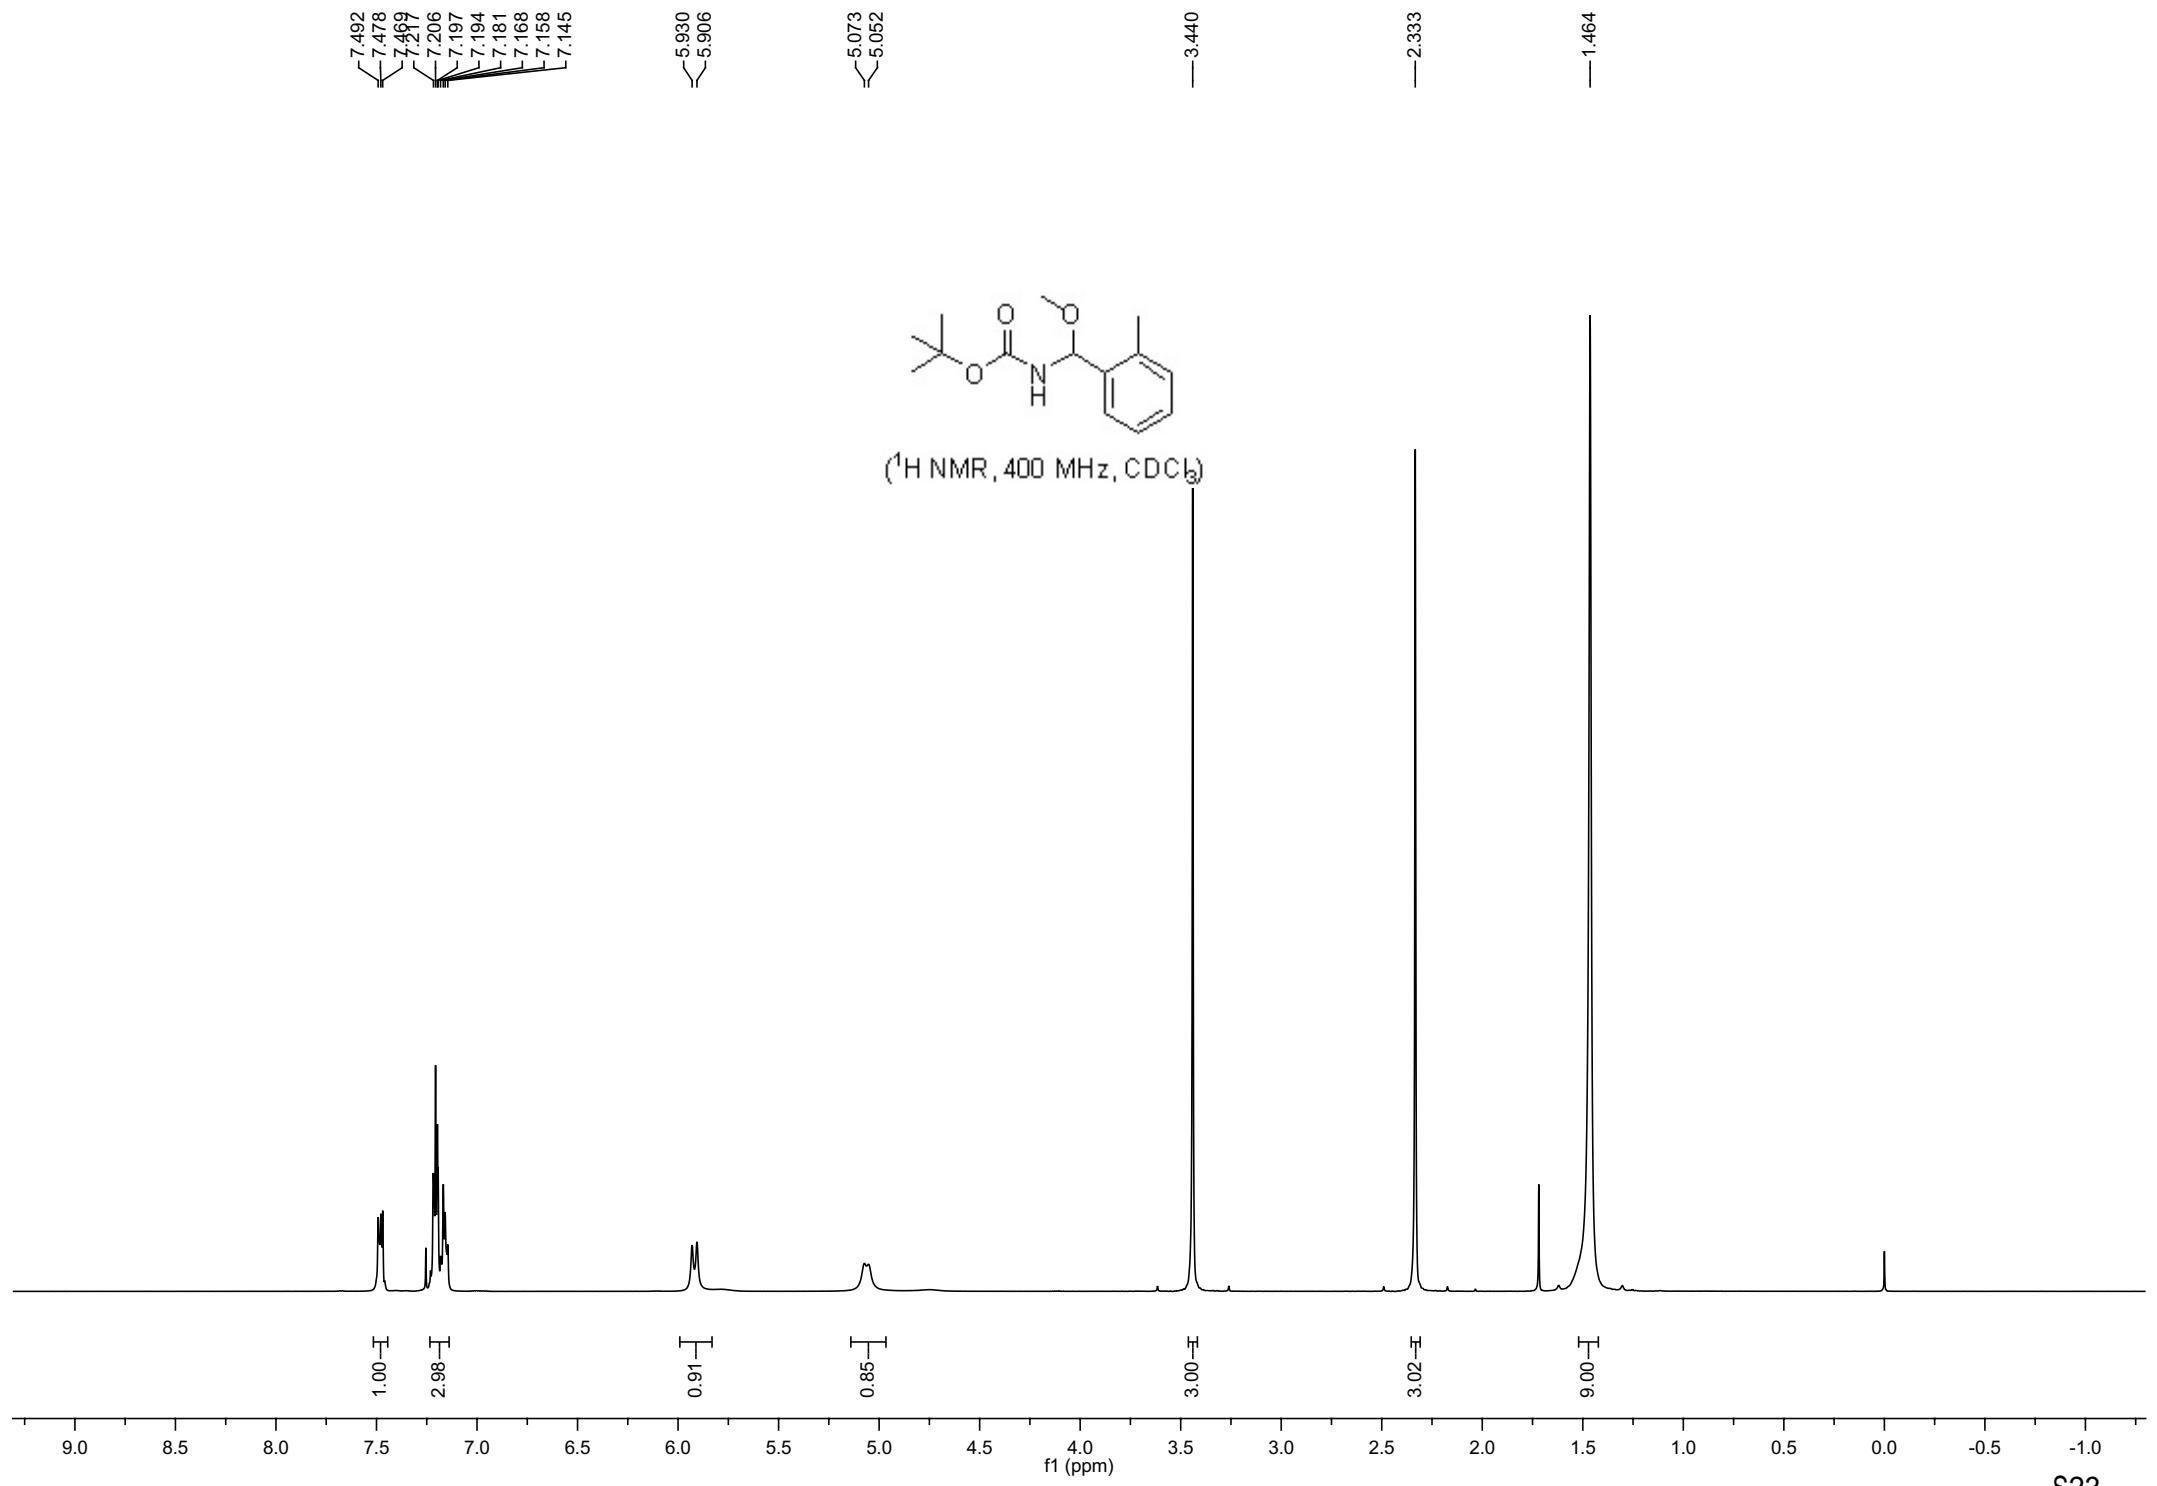

NMR spectra of compound 11

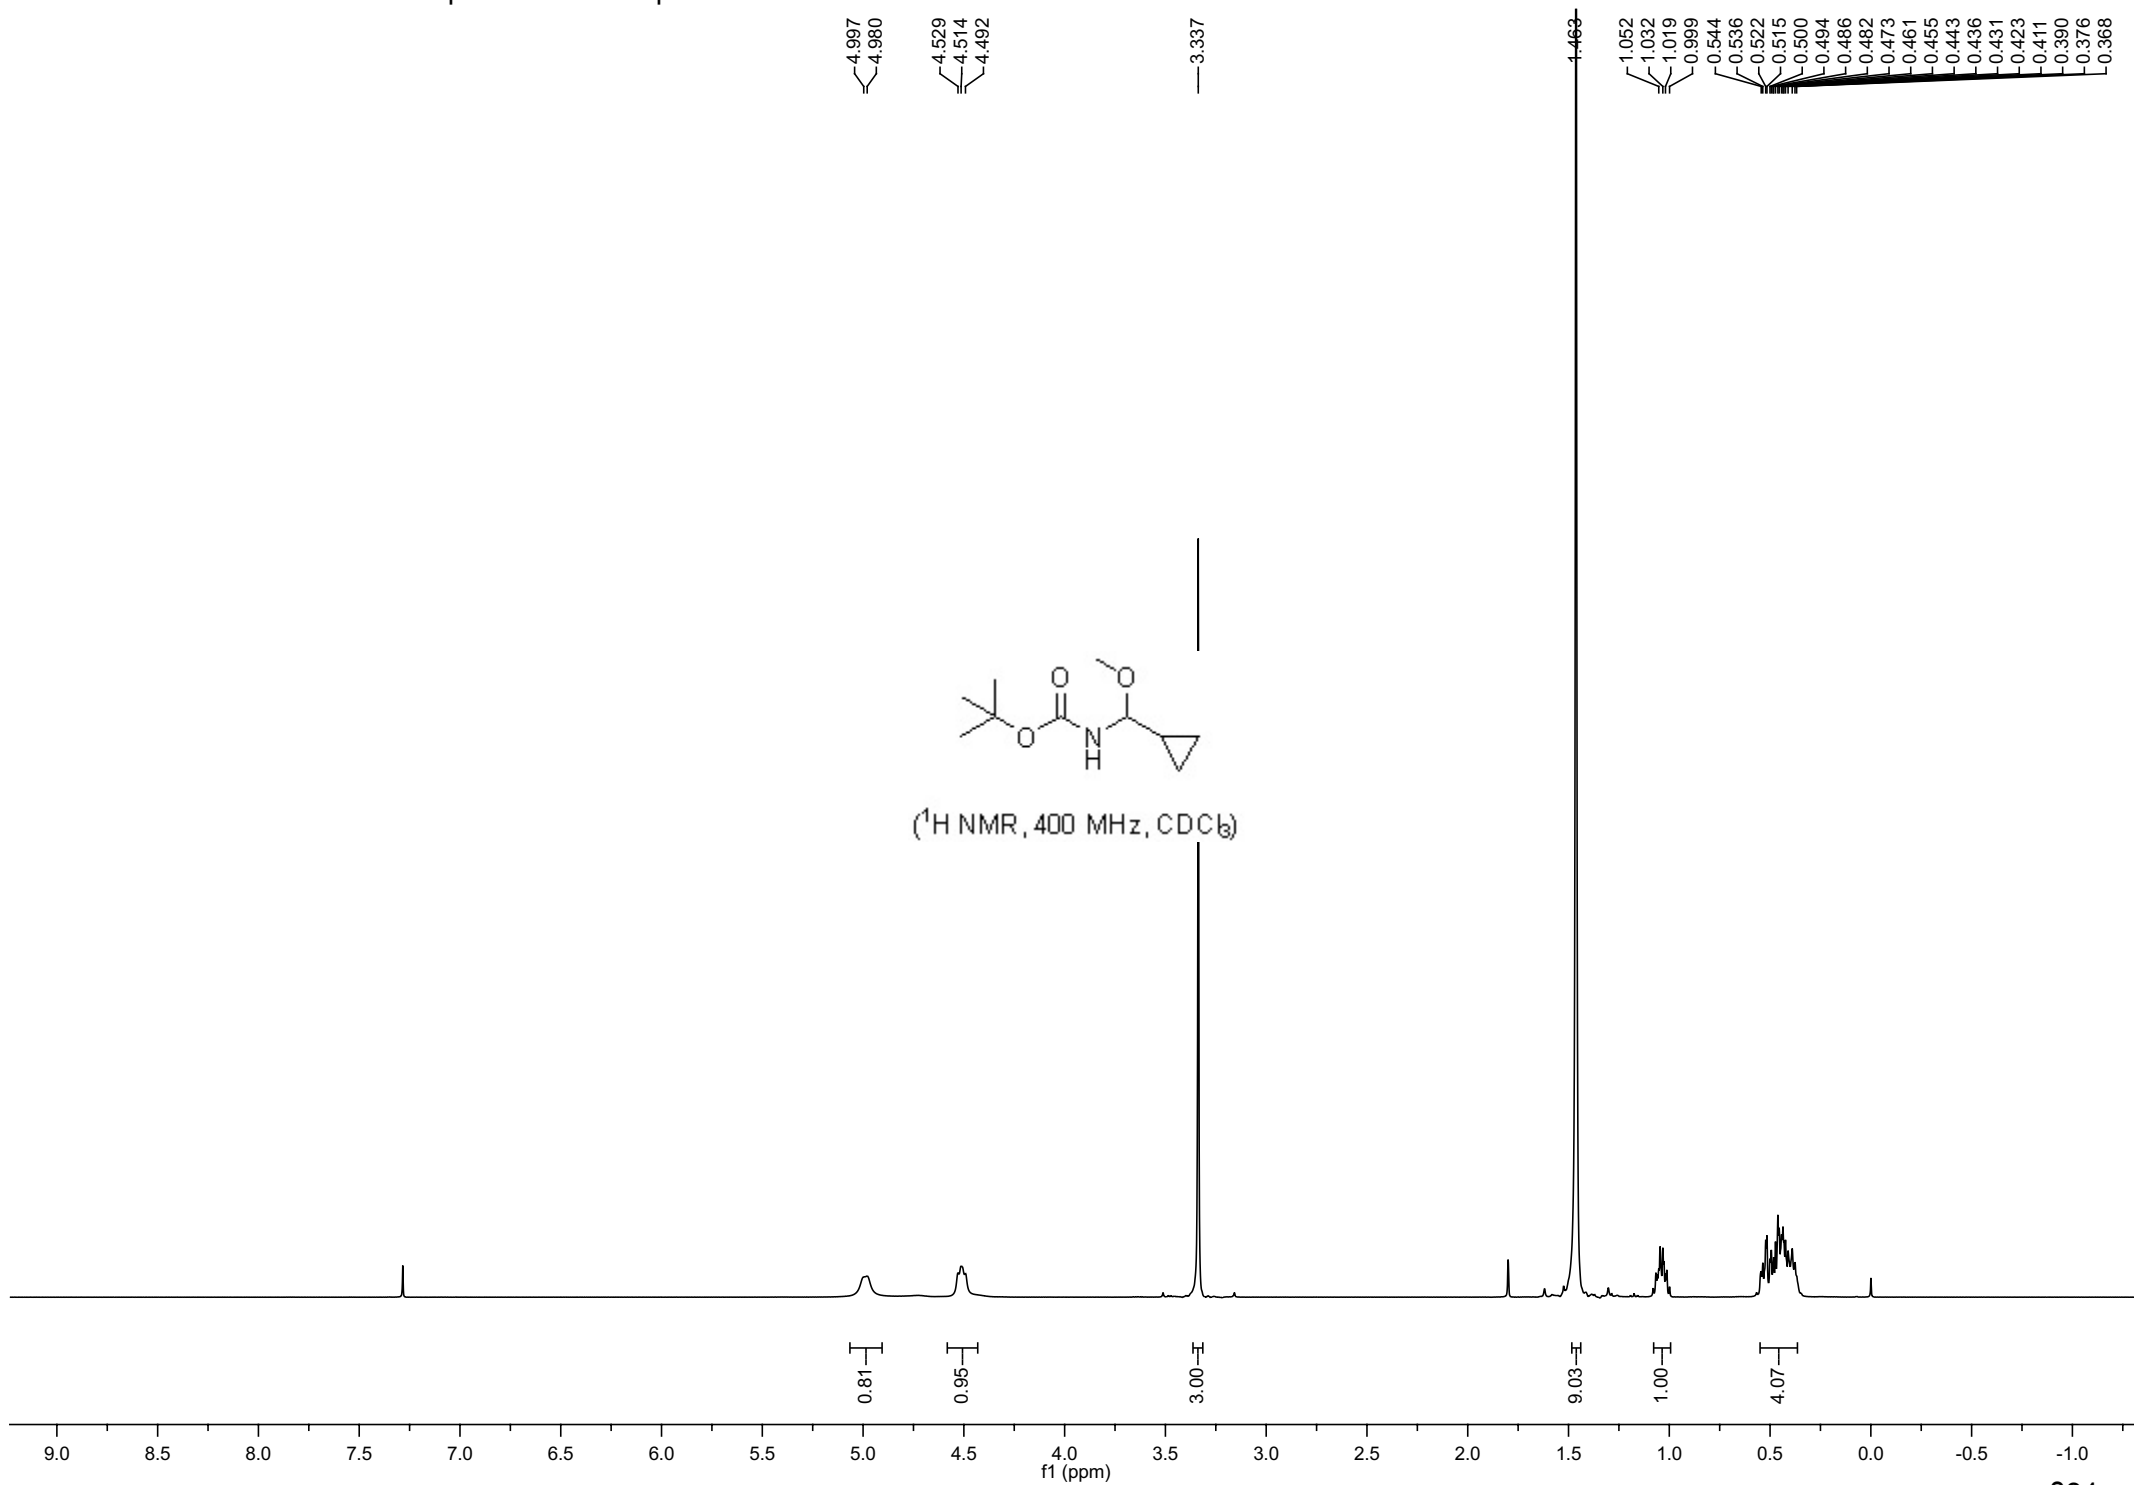



# NMR spectra of compound 11

— 155.537

— 84.772

— 79.805

— 55.585

— 28.421

— 15.610

— 2.077  
— 1.271

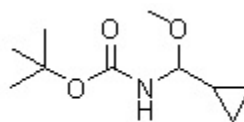

(<sup>13</sup>C NMR, 100 MHz, CDCl<sub>3</sub>)

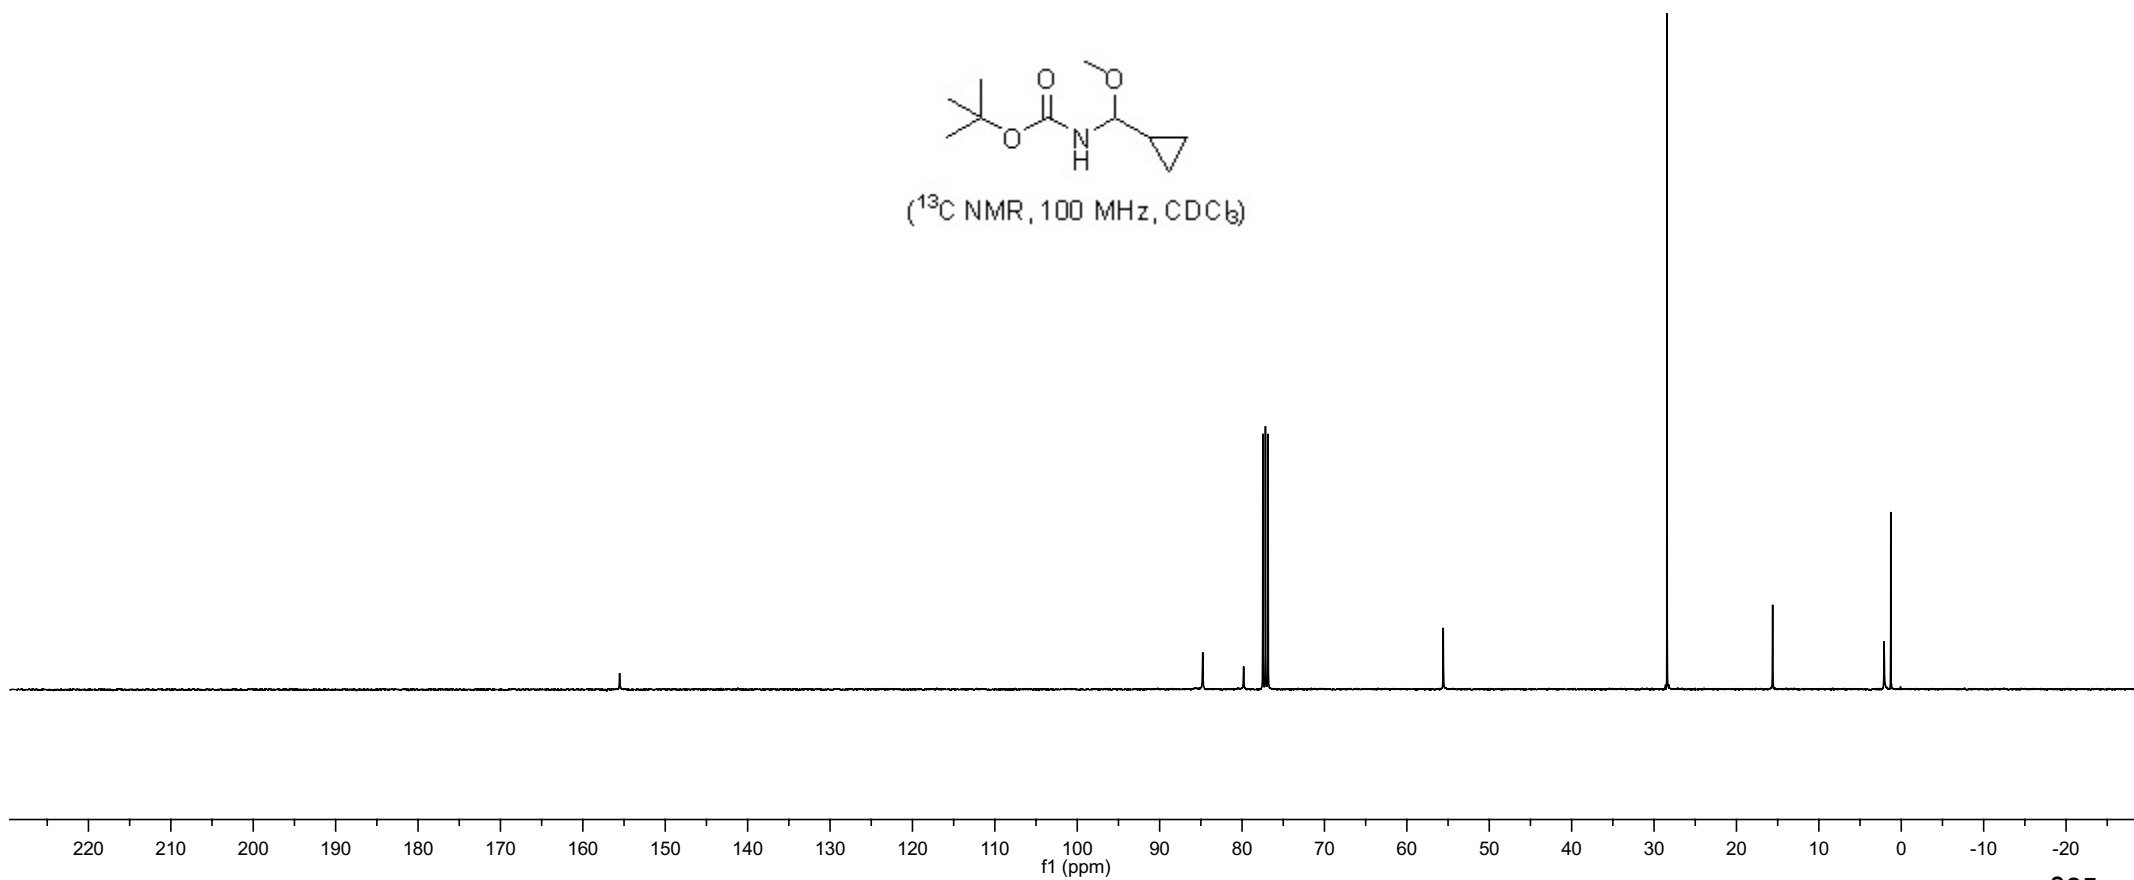

NMR spectra of compound **1m**

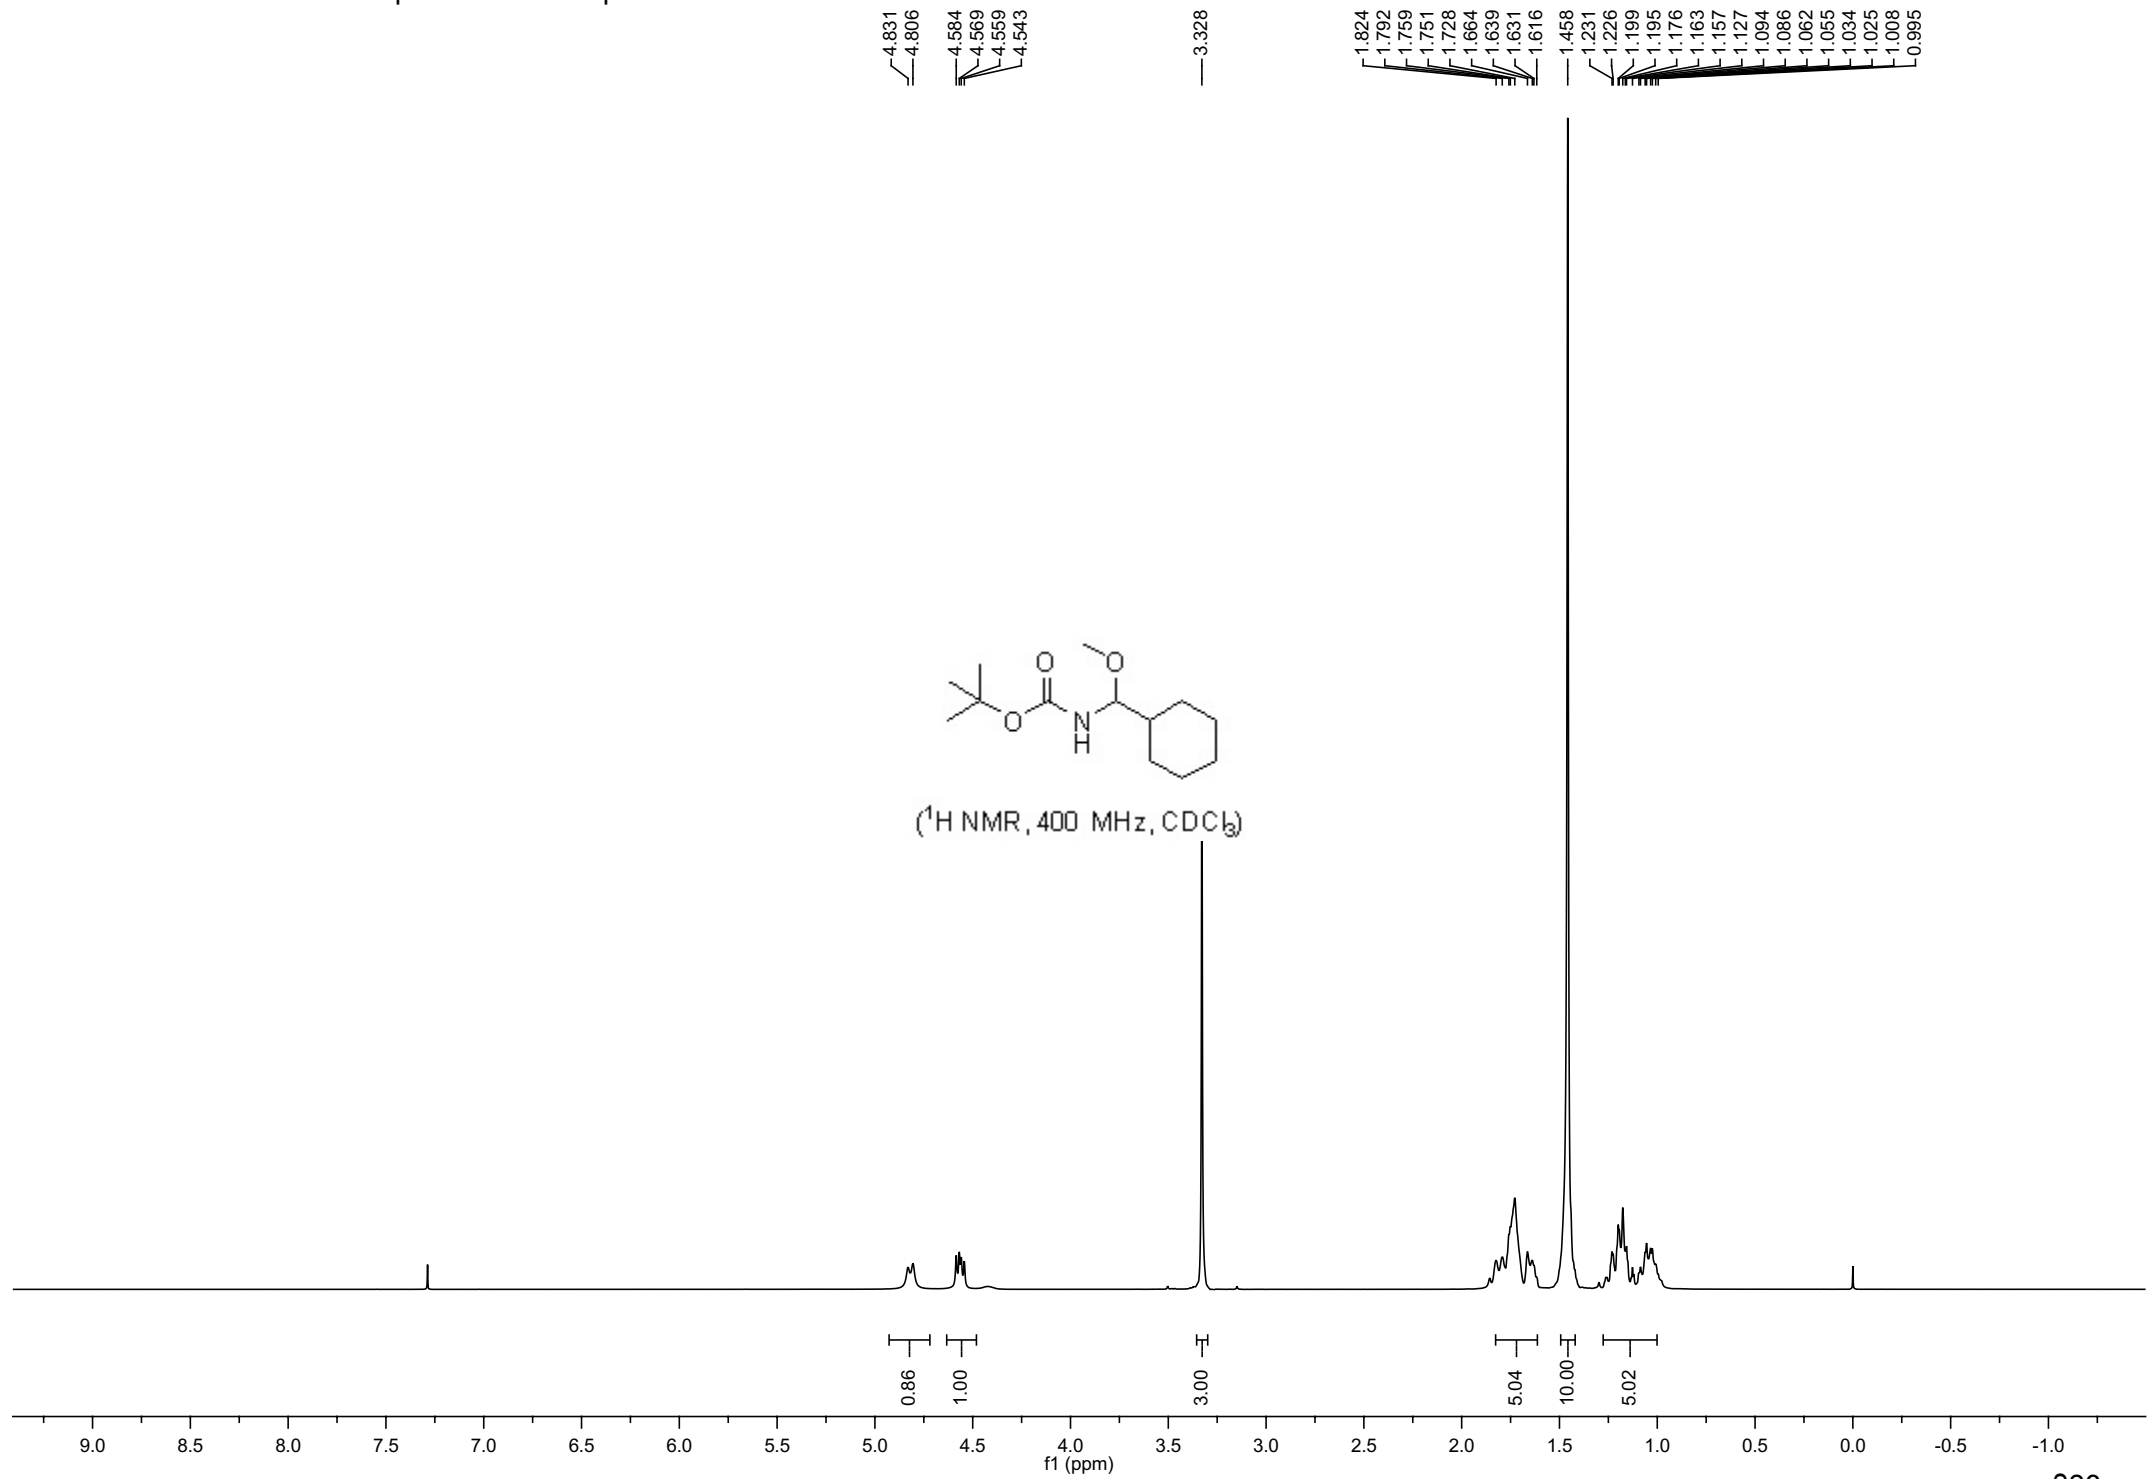

NMR spectra of compound 1m

— 155.940

— 86.743

— 79.601

— 55.673

— 42.940

— 28.431

— 27.986

— 26.451

— 25.950

— 25.875

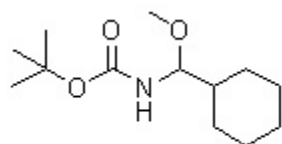

(<sup>13</sup>C NMR, 100 MHz, CDCl<sub>3</sub>)

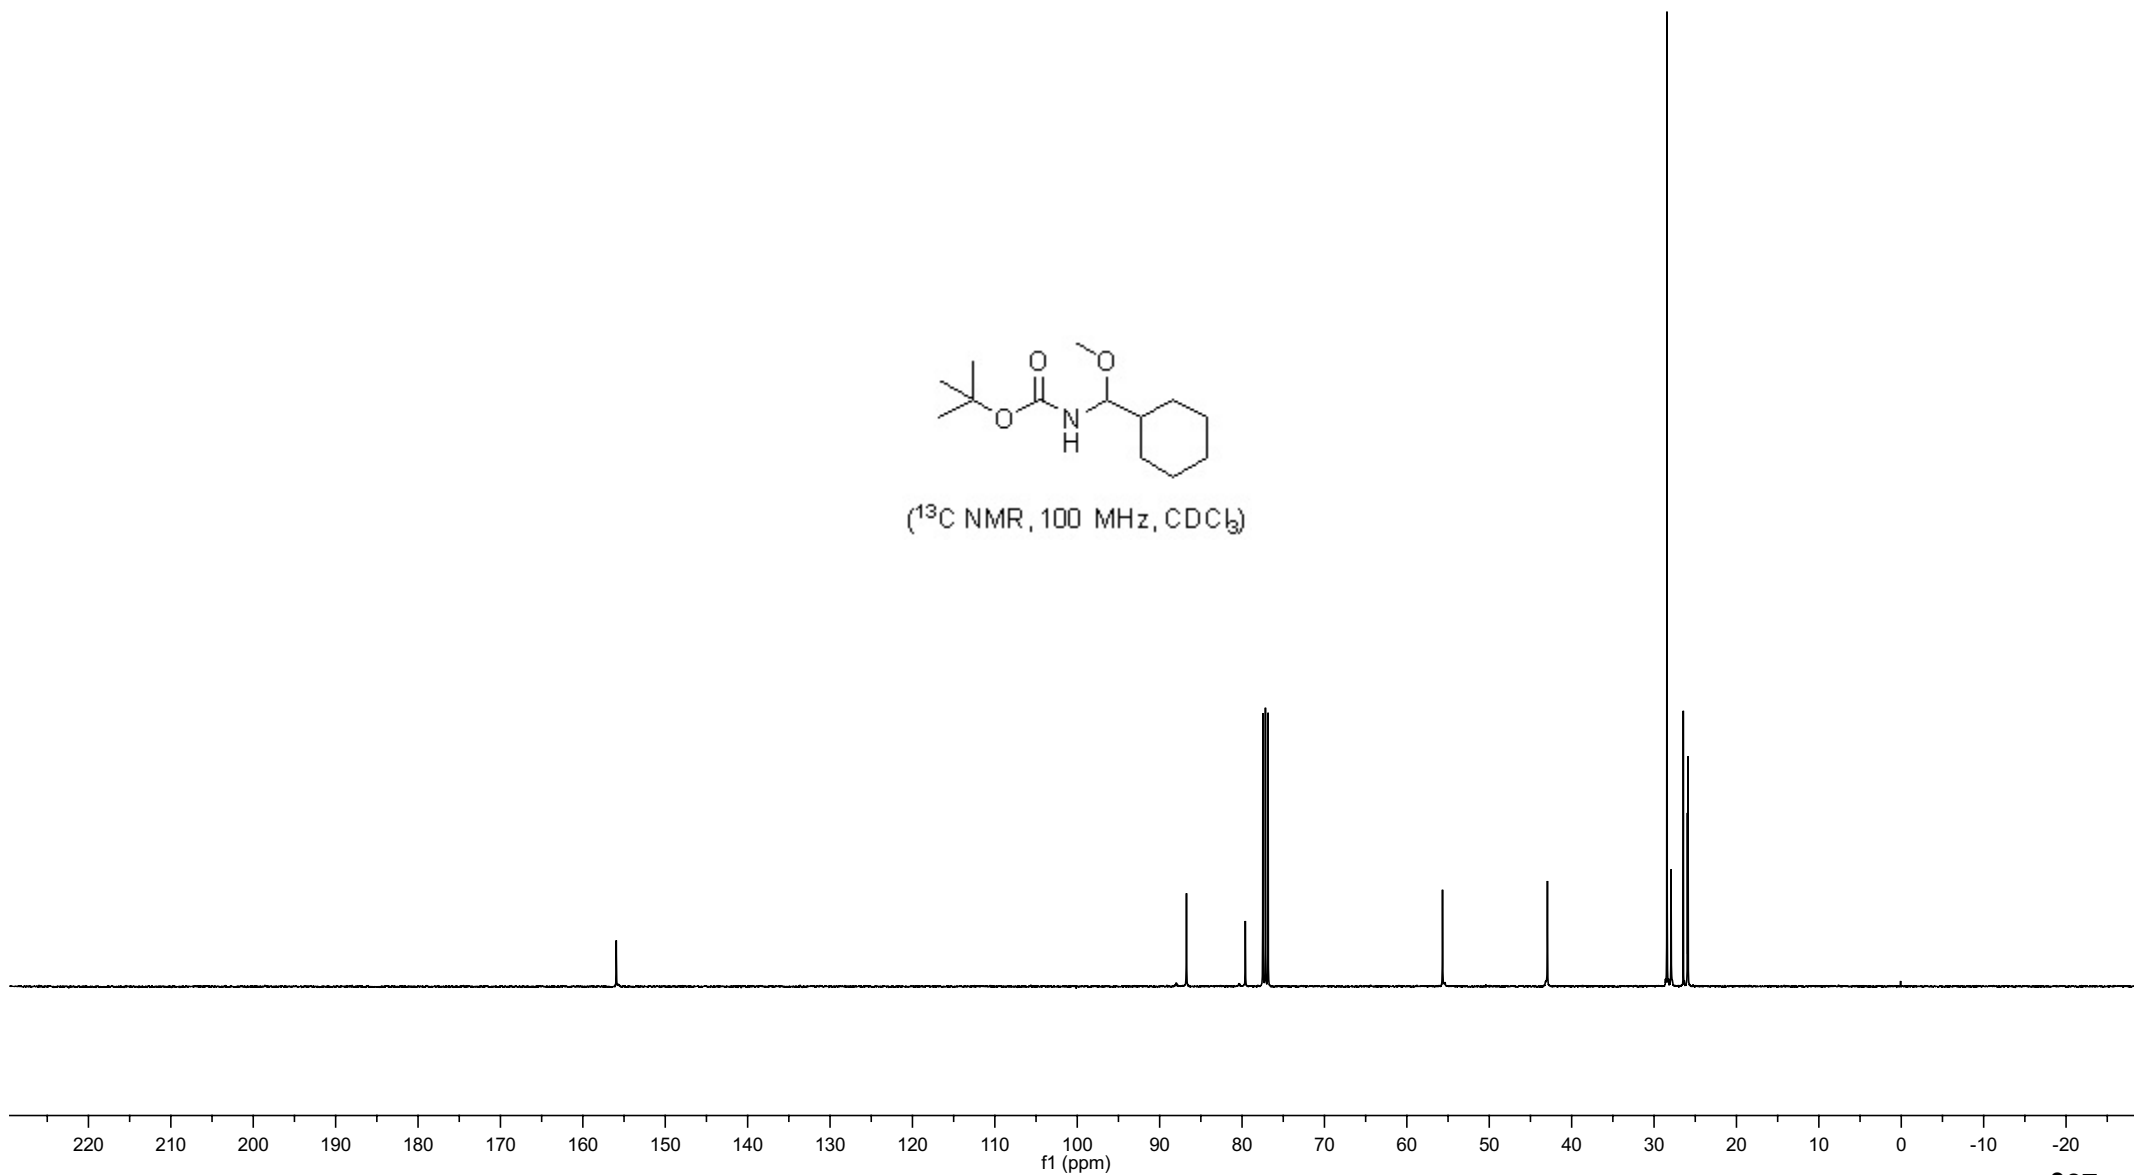

NMR spectra of compound 1n

4.870  
4.841  
4.827  
4.812  
4.803  
4.787

3.339

1.654  
1.639  
1.619  
1.604  
1.535  
1.515  
1.498  
1.460  
1.426  
1.408  
1.390  
1.371  
0.942  
0.924  
0.906

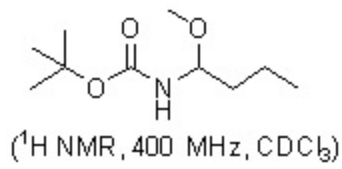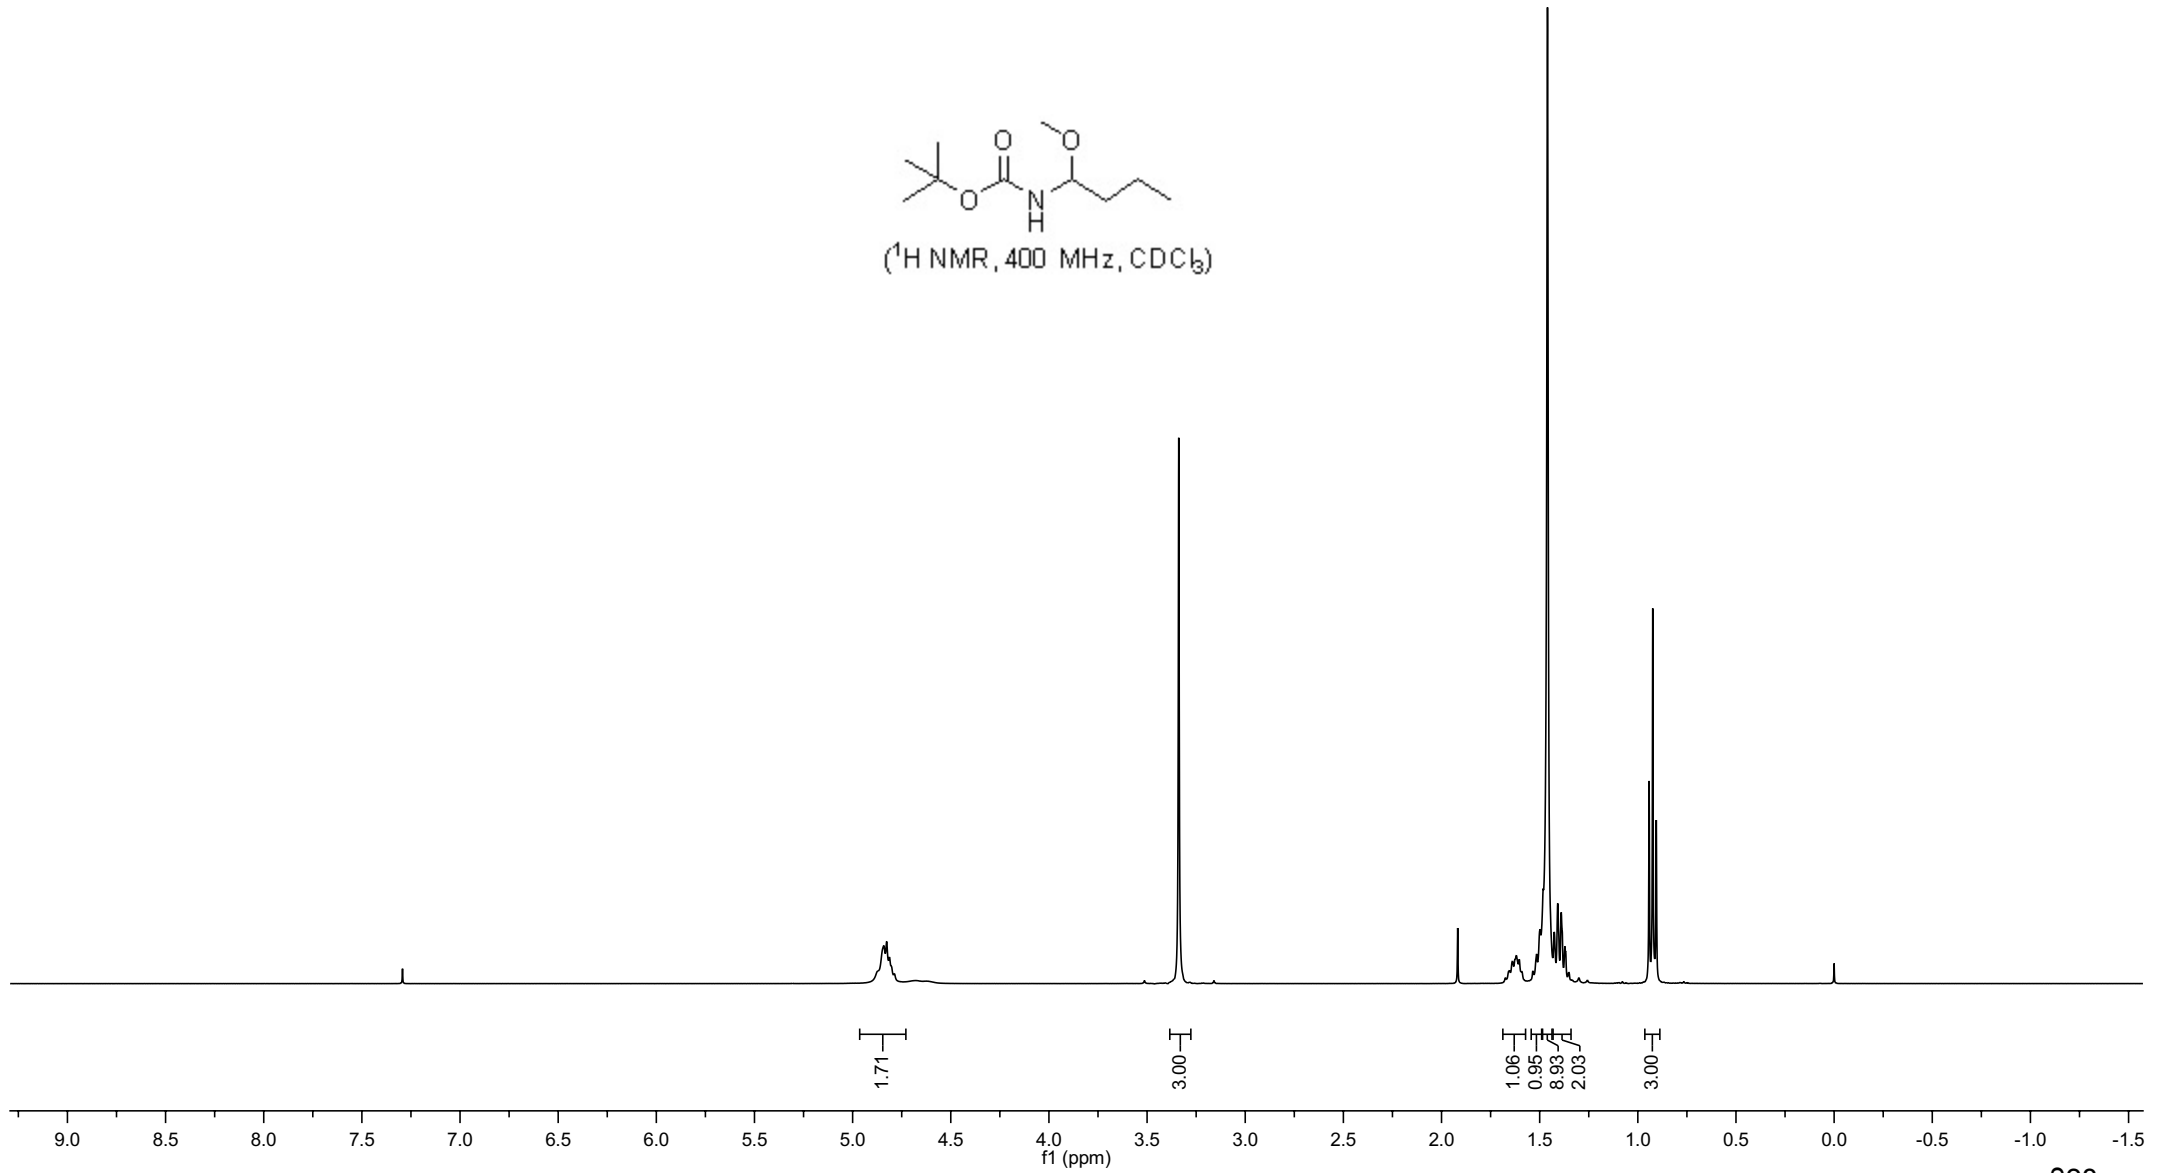

# NMR spectra of compound 1n

— 155.680

— 82.878  
— 79.701

— 55.387

— 37.786

— 28.408

— 18.303  
— 13.826

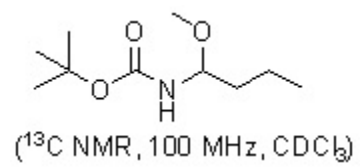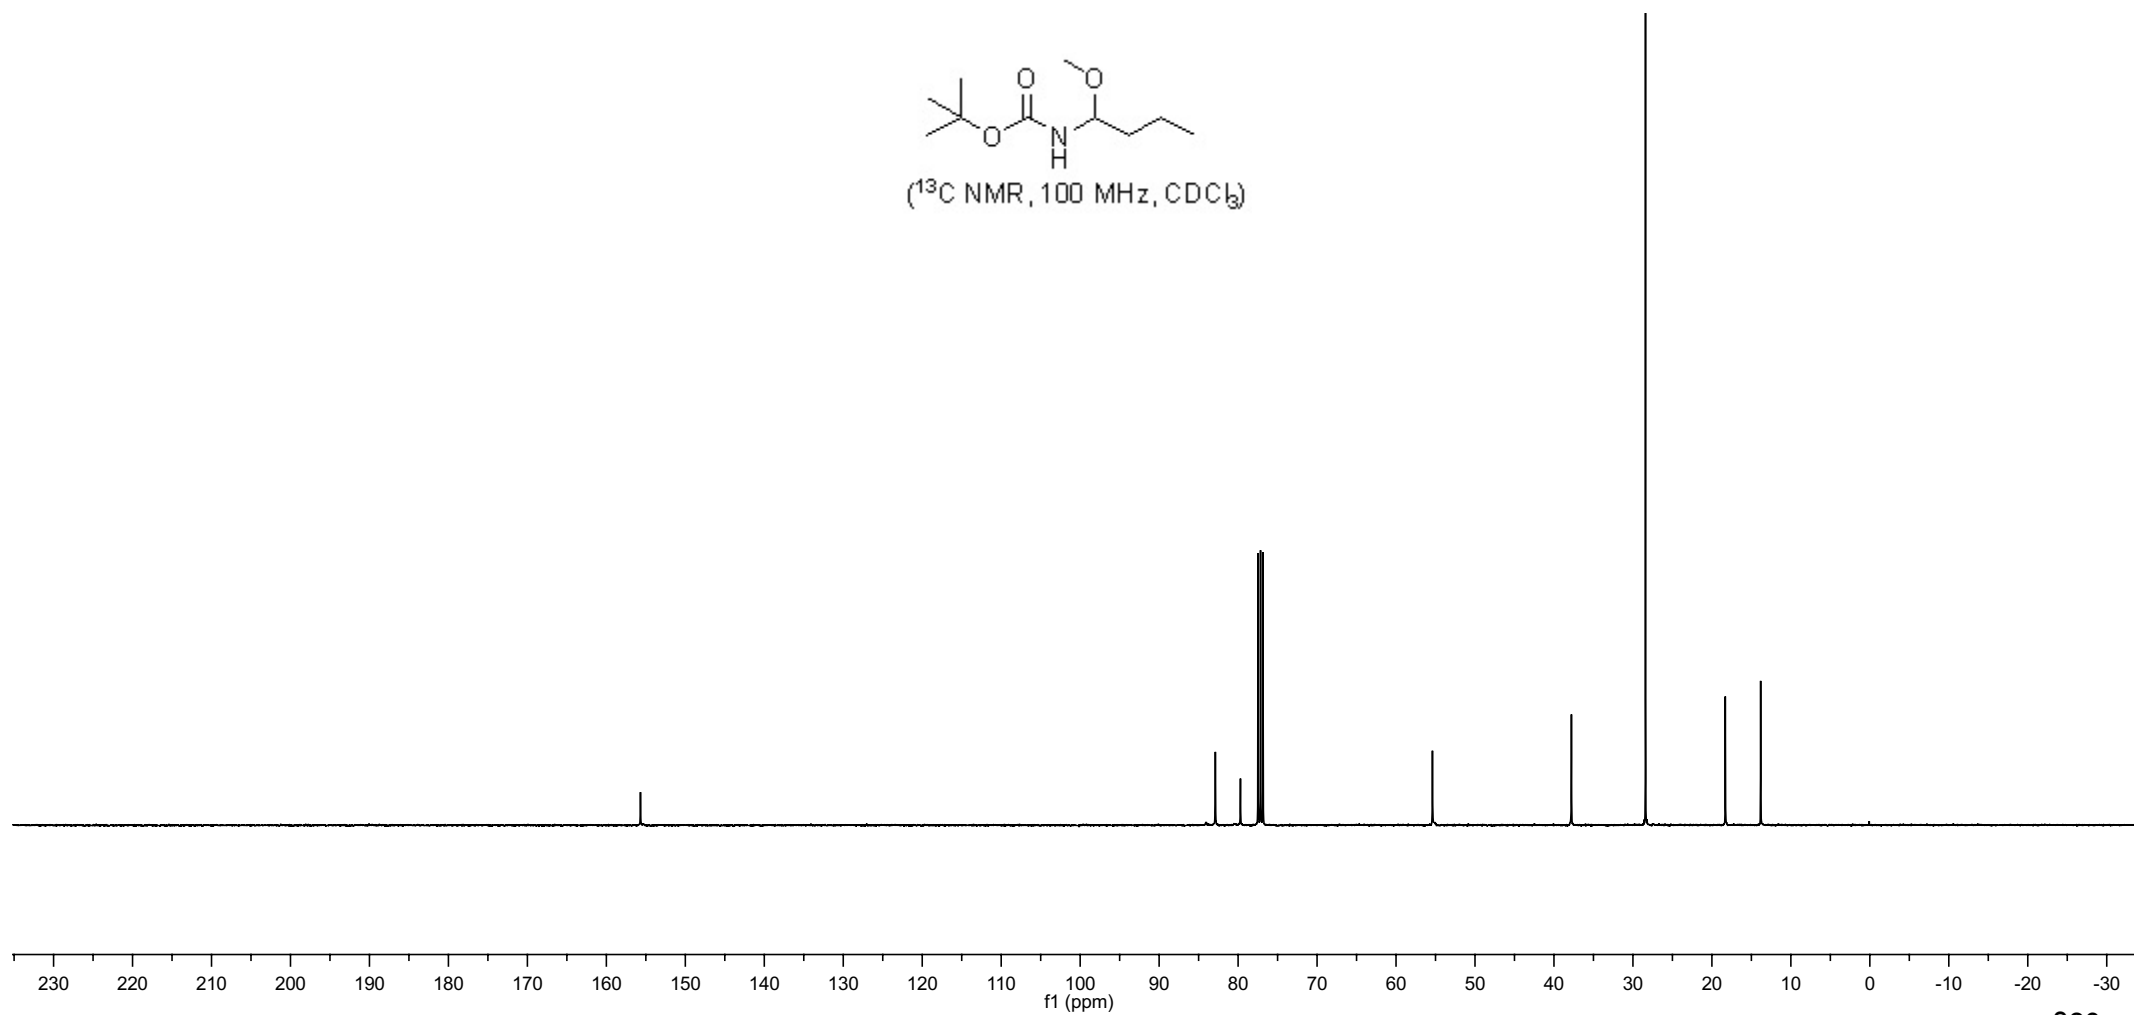

NMR spectra of compound 10

4.810  
4.786

4.589  
4.575  
4.564  
4.549

3.335

1.840  
1.807  
1.791  
1.774  
1.758  
1.462

0.948  
0.931  
0.925  
0.908

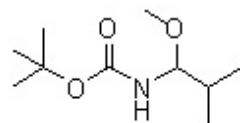

(<sup>1</sup>H NMR, 400 MHz, CDCl<sub>3</sub>)

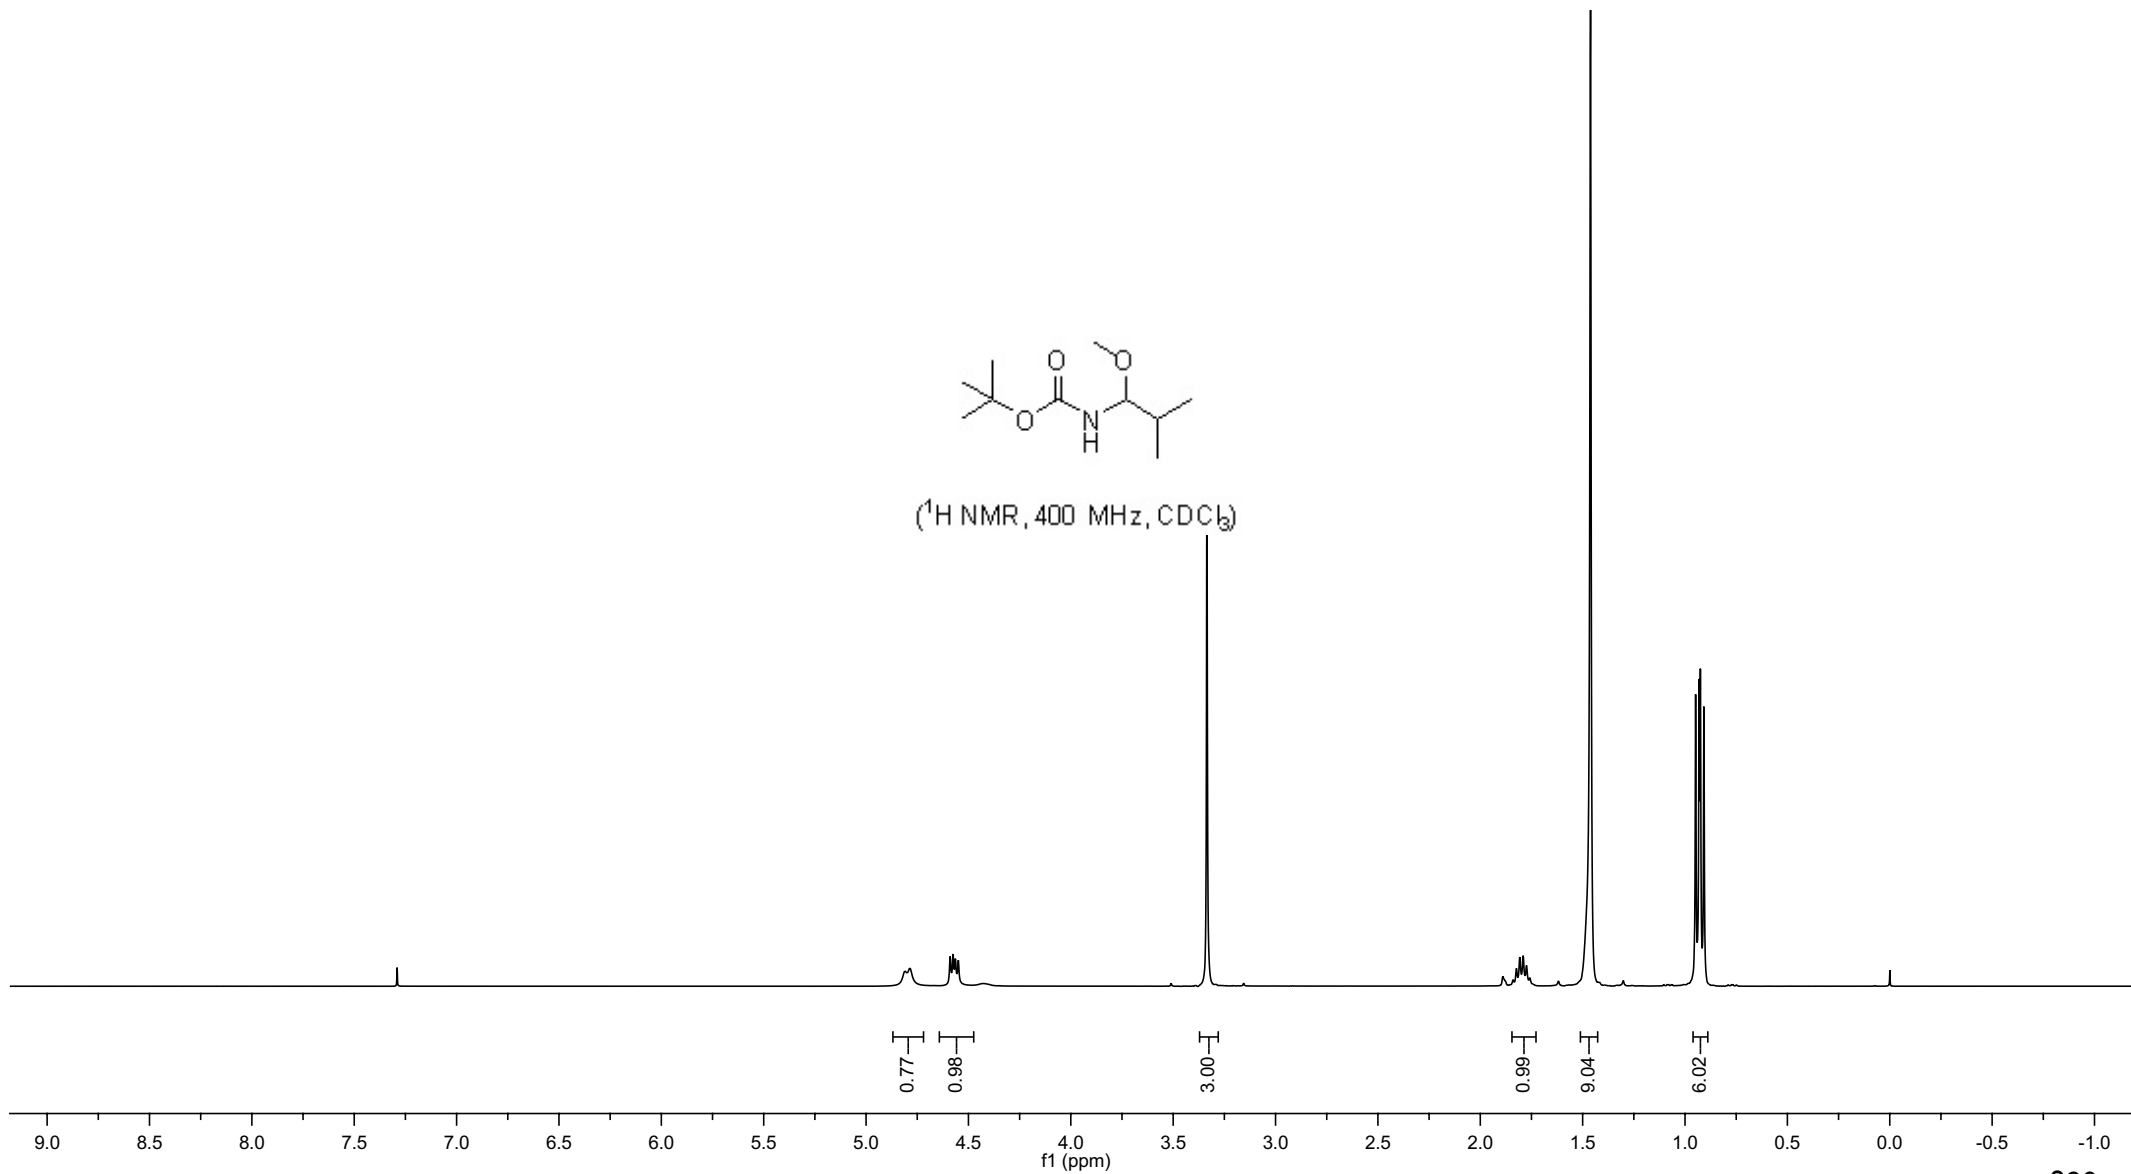

NMR spectra of compound **1p**

4.904  
4.887  
4.879  
4.863  
4.847  
4.796  
4.775

3.338

1.760  
1.743  
1.726  
1.709  
1.692  
1.524  
1.400  
1.366  
1.332  
0.933  
0.926  
0.917  
0.909

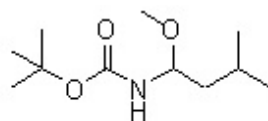

(<sup>1</sup>H NMR, 400 MHz, CDCl<sub>3</sub>)

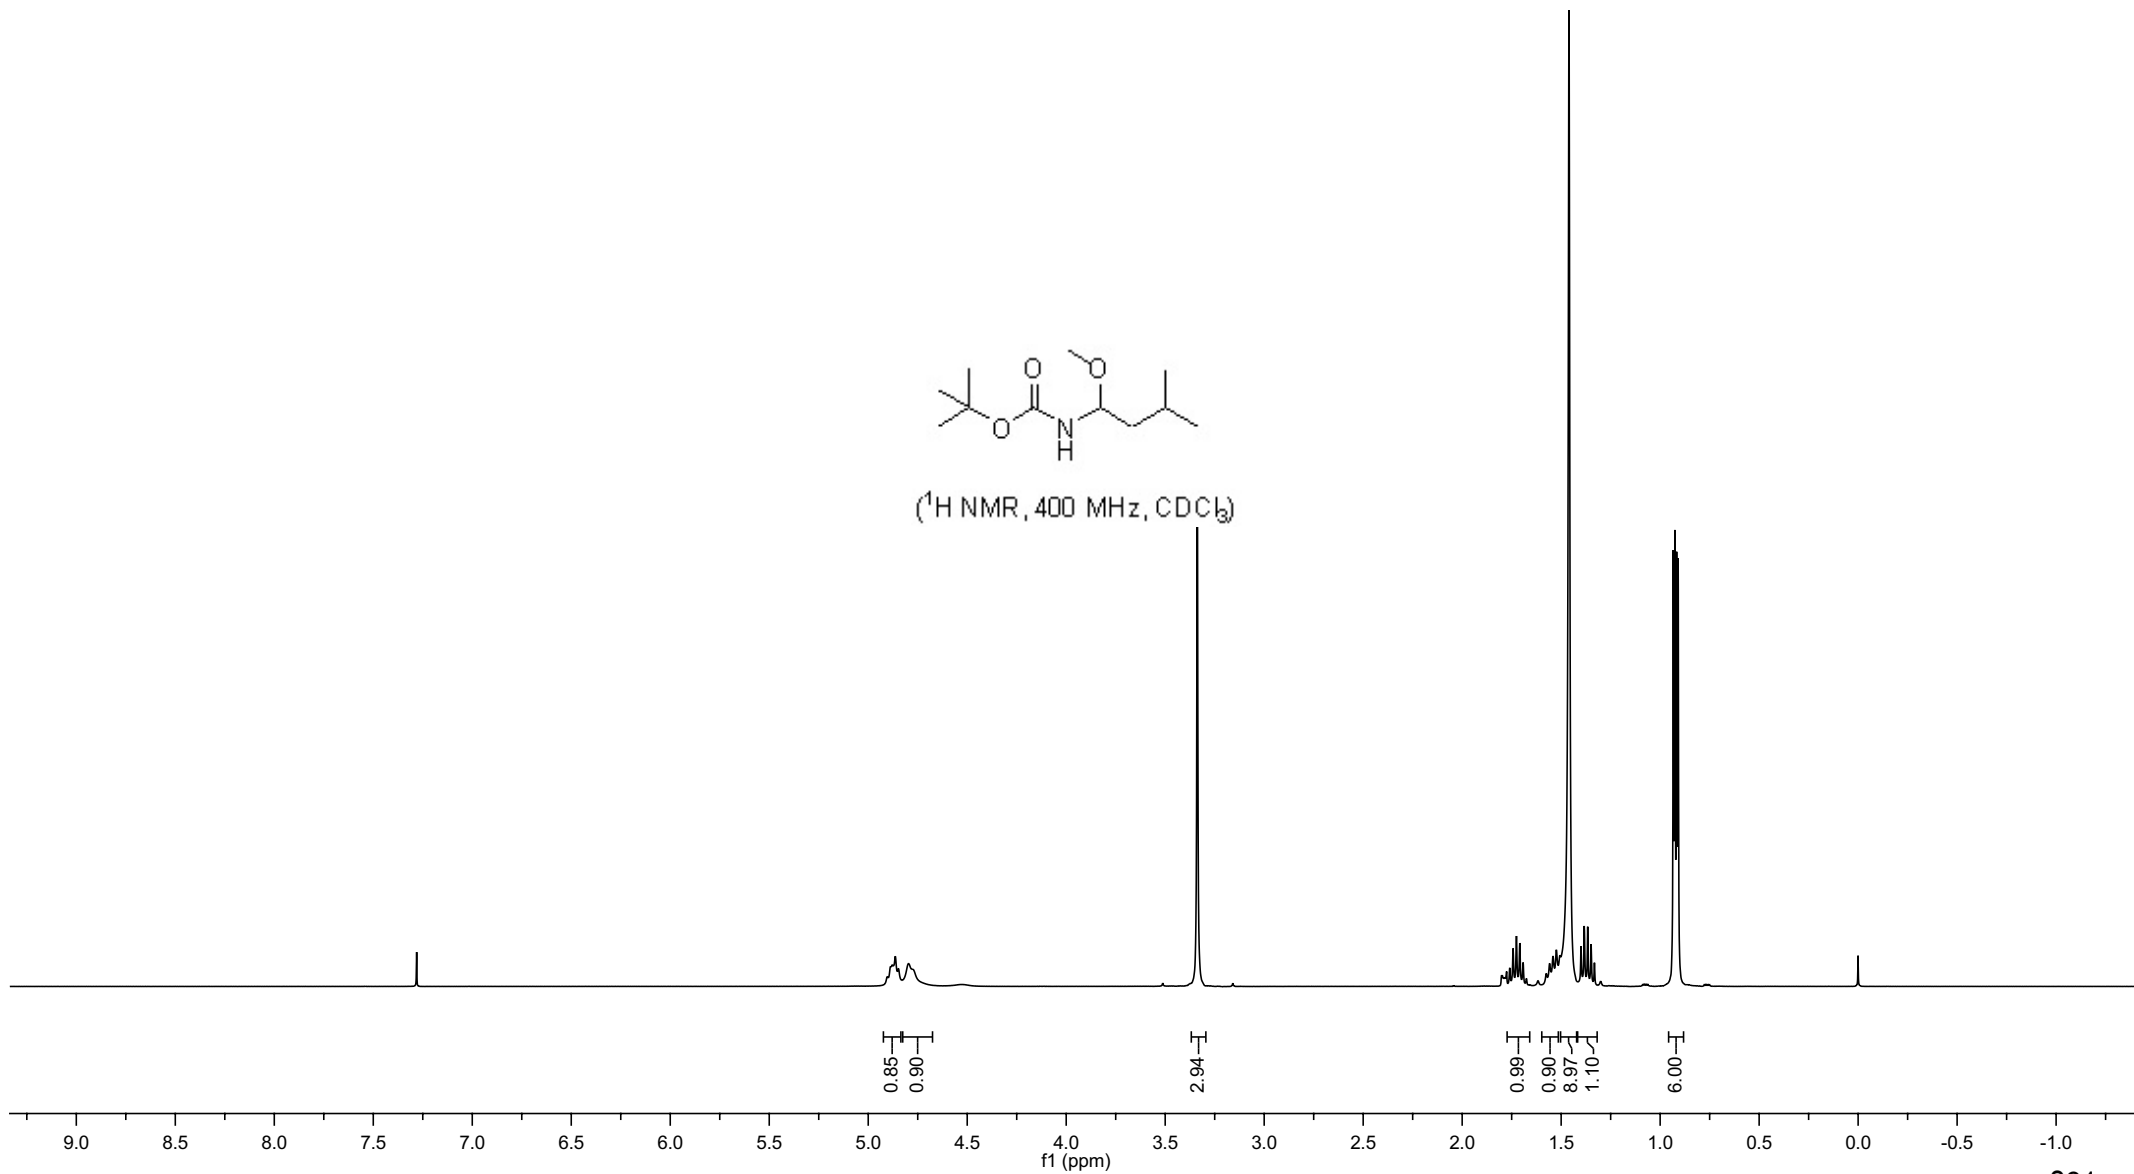

NMR spectra of compound 1q

7.292  
7.272  
7.254  
7.195  
7.181  
7.162

4.831

3.345

2.708  
2.701  
2.690  
2.685  
2.669  
2.651  
2.634  
1.921  
1.905  
1.863  
1.848  
1.830  
1.808  
1.457

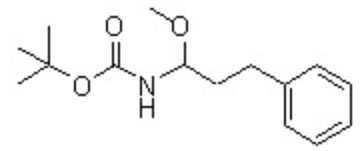

(<sup>1</sup>H NMR, 400 MHz, CDCl<sub>3</sub>)

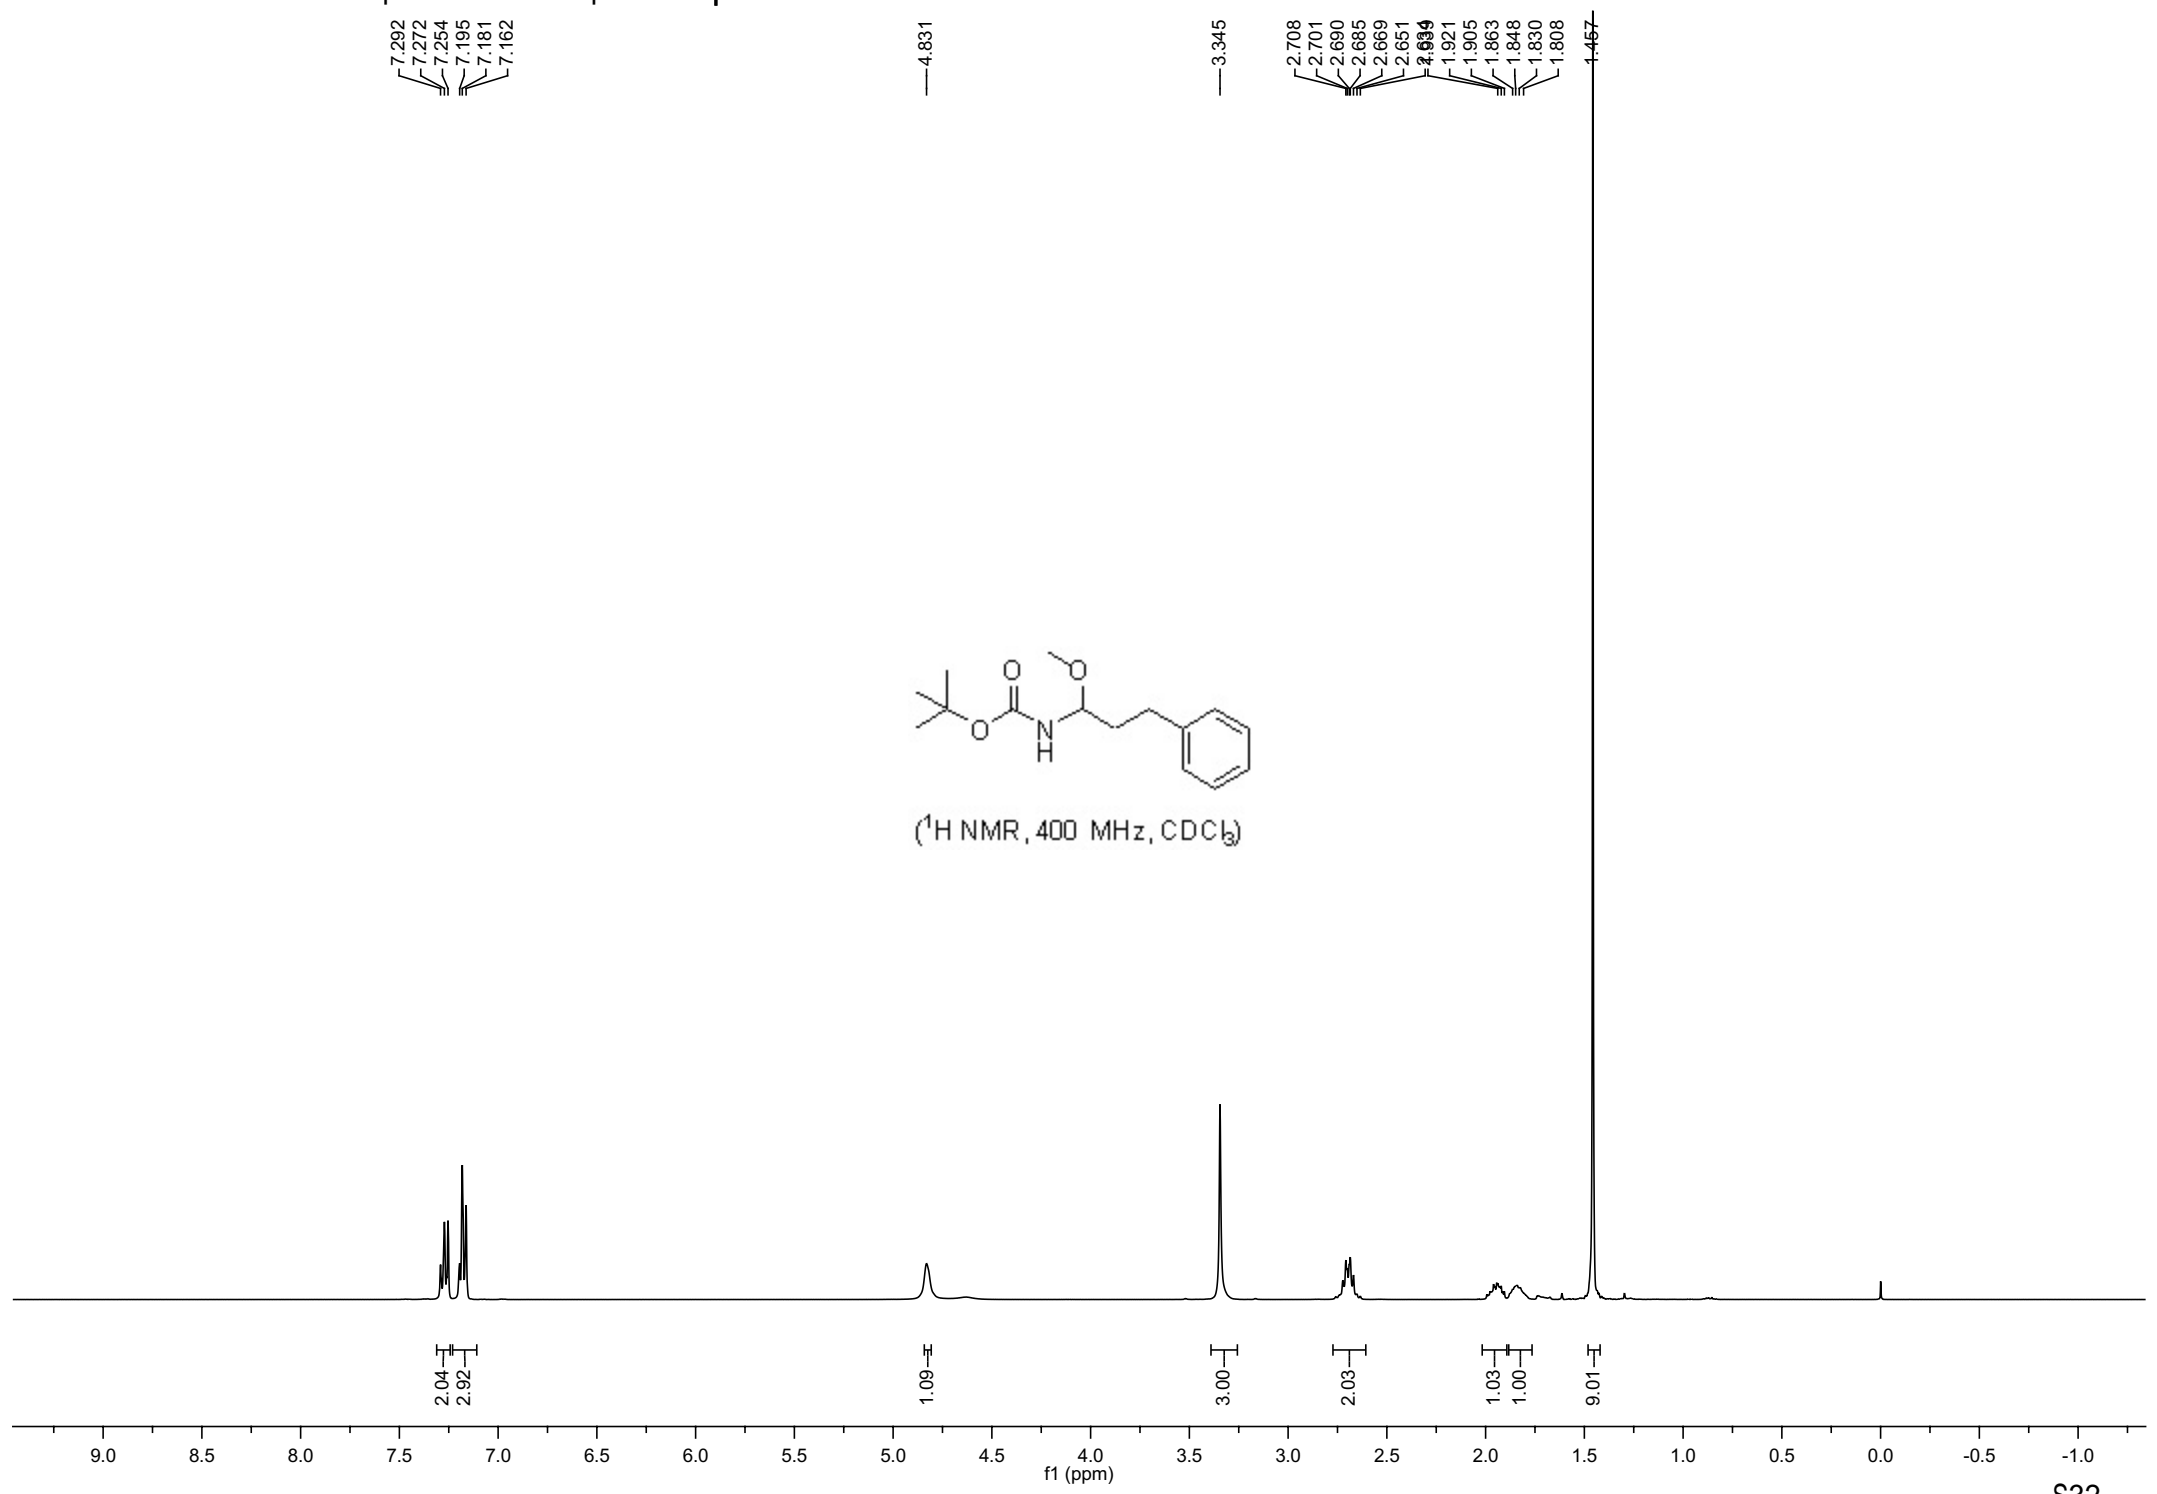



NMR spectra of compound 1q

—155.577

—141.372

—128.564

—126.101

—82.596

—79.859

—55.457

—37.467

—31.446

—28.425

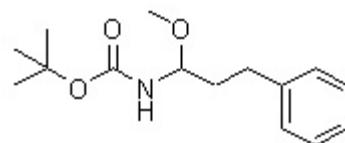

(<sup>13</sup>C NMR, 100 MHz, CDCl<sub>3</sub>)

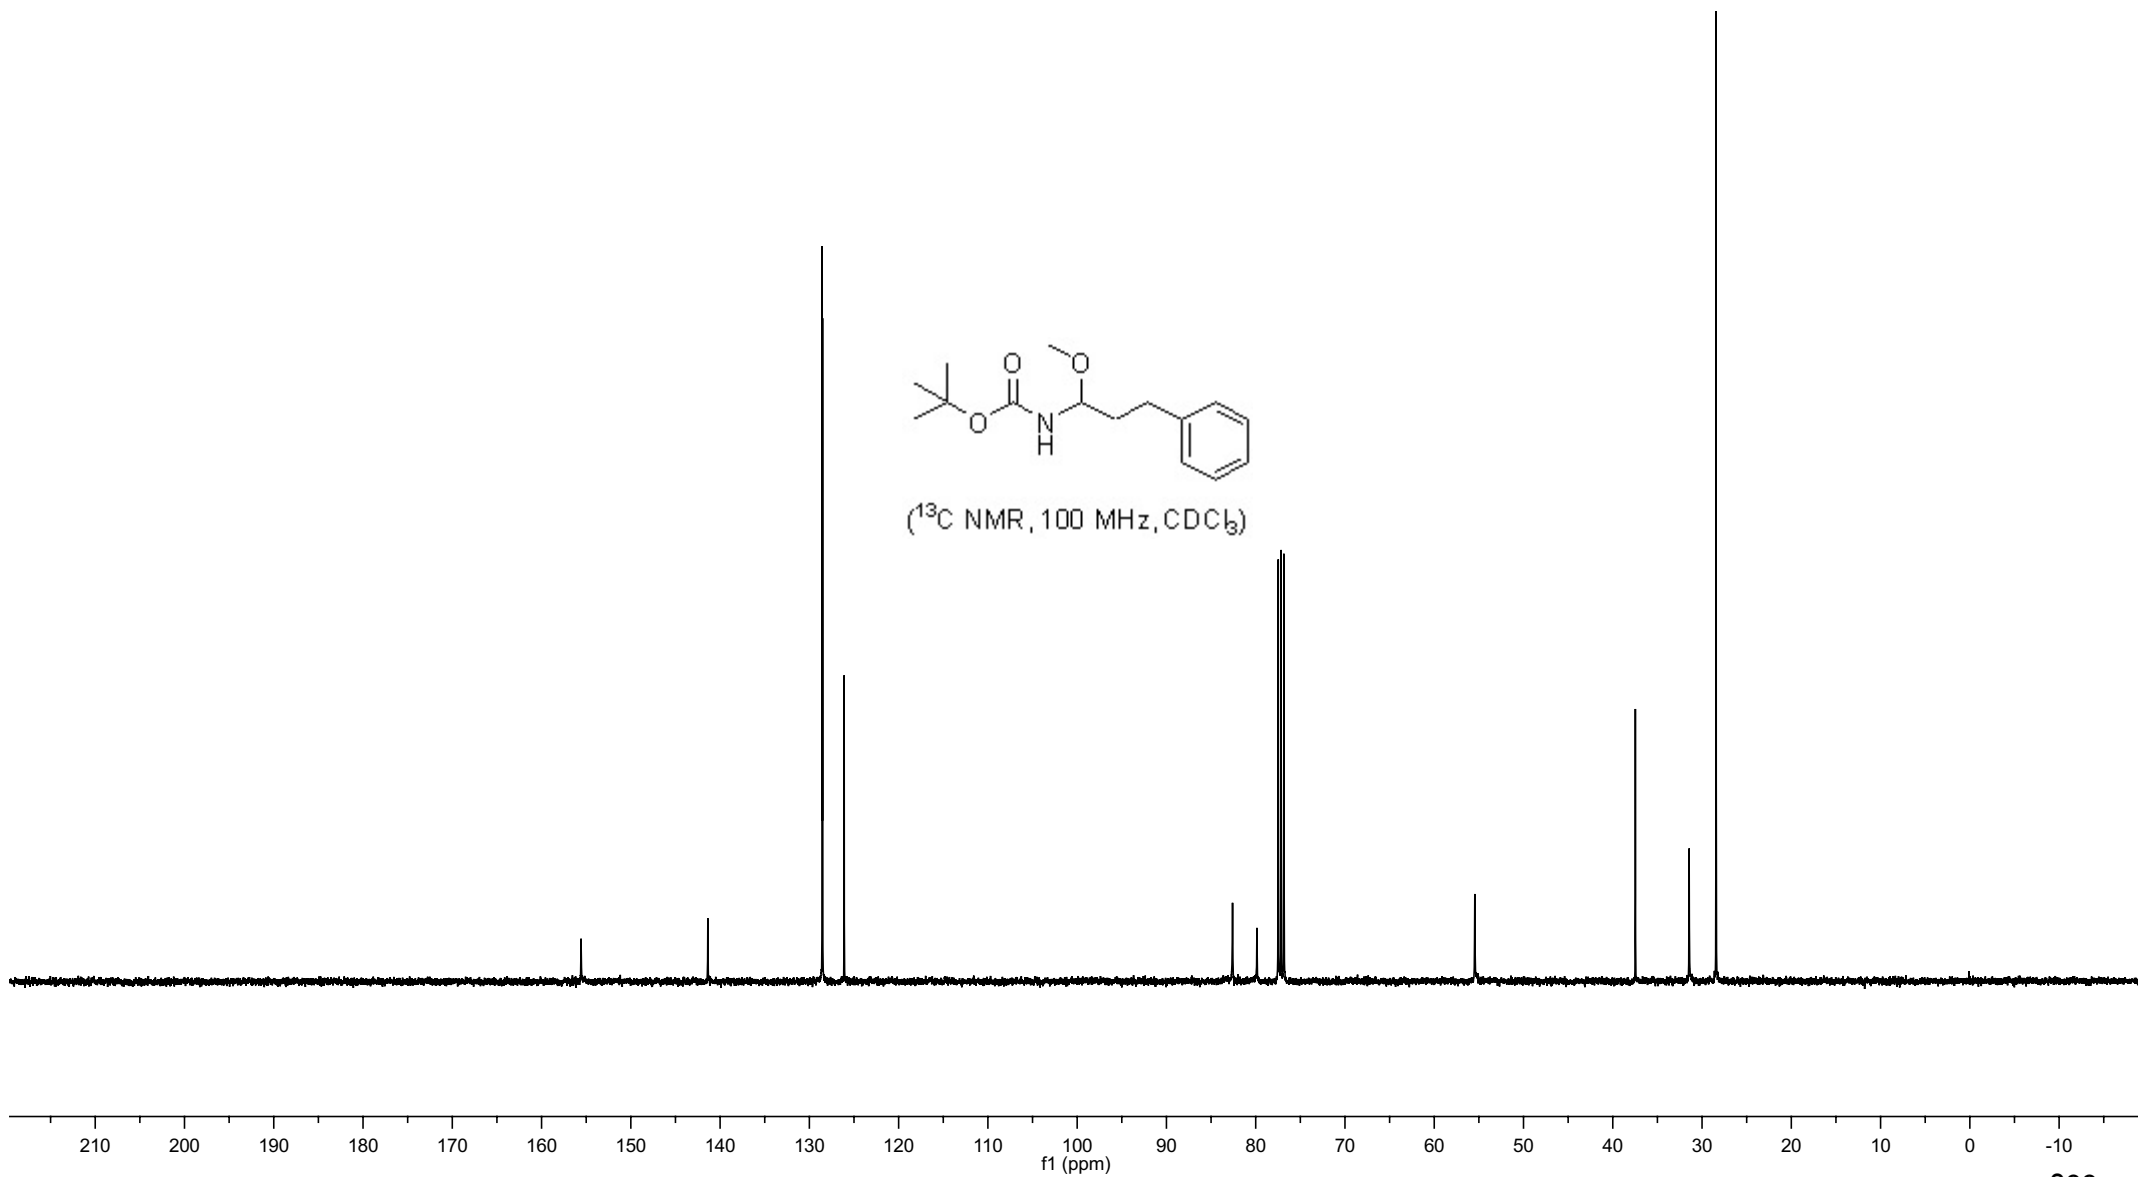

NMR spectra of compound 1r

7.367  
7.360  
7.351  
7.346  
7.339  
7.331  
7.323  
7.318  
7.305  
7.299  
7.292  
7.287  
7.283  
7.273  
7.269

5.312  
5.289  
5.009  
4.985  
4.615  
4.585  
4.568  
4.538

3.566  
3.554  
3.526  
3.516  
3.501  
3.491  
3.378

1.457

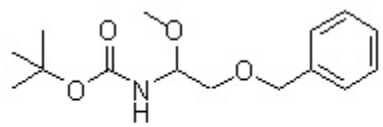

(<sup>1</sup>H NMR, 400 MHz, CDCl<sub>3</sub>)

5.00

0.82

0.96

2.00

2.00

3.00

9.02

9.0 8.5 8.0 7.5 7.0 6.5 6.0 5.5 5.0 4.5 4.0 3.5 3.0 2.5 2.0 1.5 1.0 0.5 0.0 -0.5 -1.0

f1 (ppm)

NMR spectra of compound 1r

—155.603

—137.823

—128.605  
—128.525

—81.281  
—79.976

—73.728  
—71.387

—55.658

—28.388

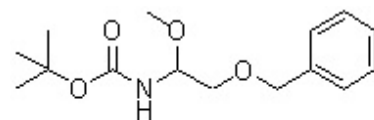

(<sup>13</sup>C NMR, 100 MHz, CDCl<sub>3</sub>)

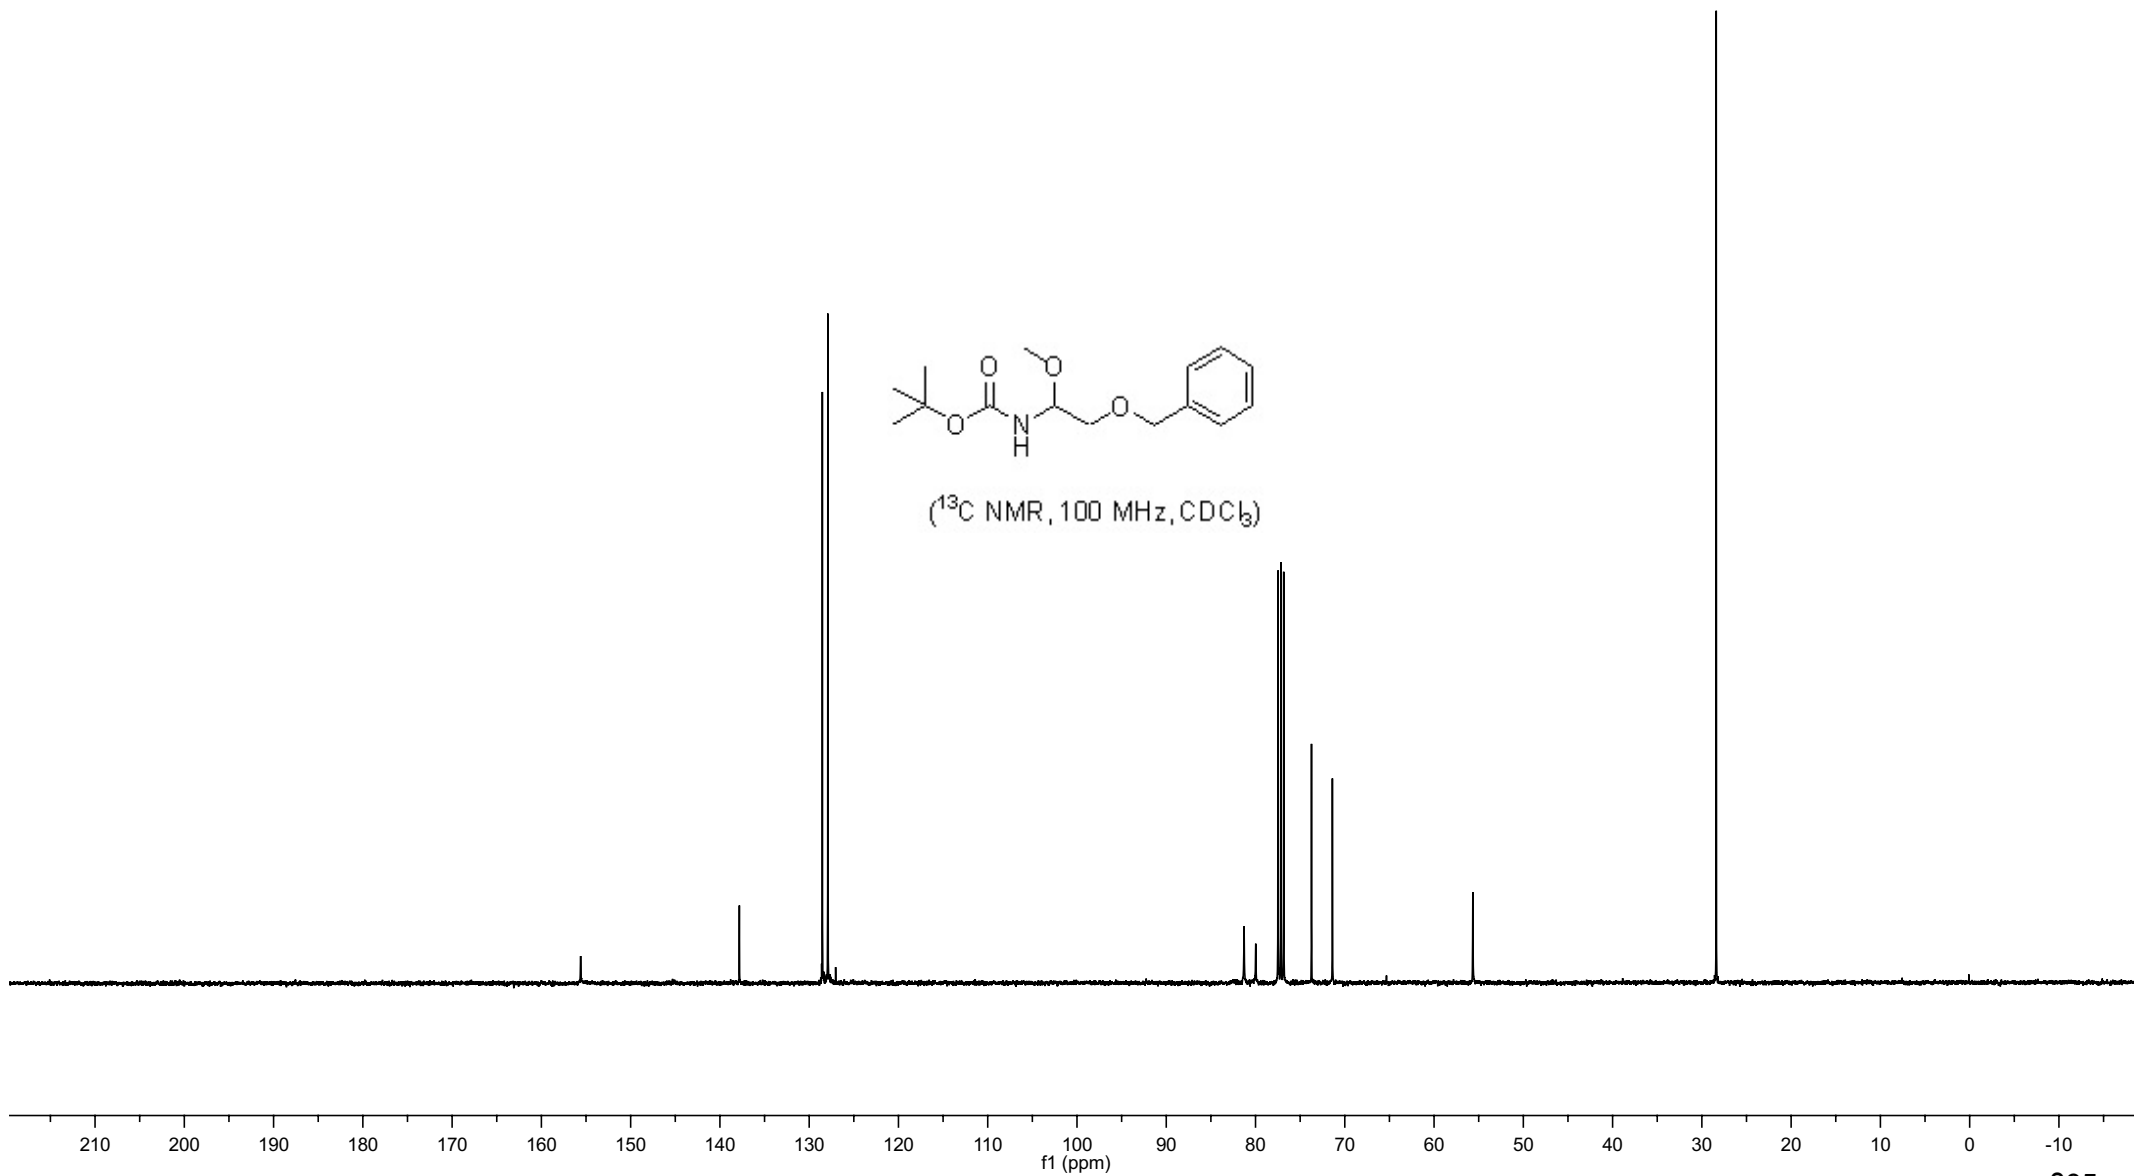

NMR spectra of compound 1s

7.270  
7.268  
7.263  
7.258  
7.255

7.039  
6.982  
6.973  
6.970  
6.961

6.074  
6.050

5.268  
5.256

3.466

1.489

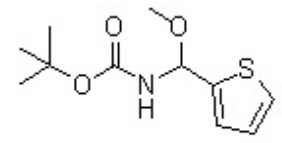

(<sup>1</sup>H NMR, 400 MHz, CDCl<sub>3</sub>)

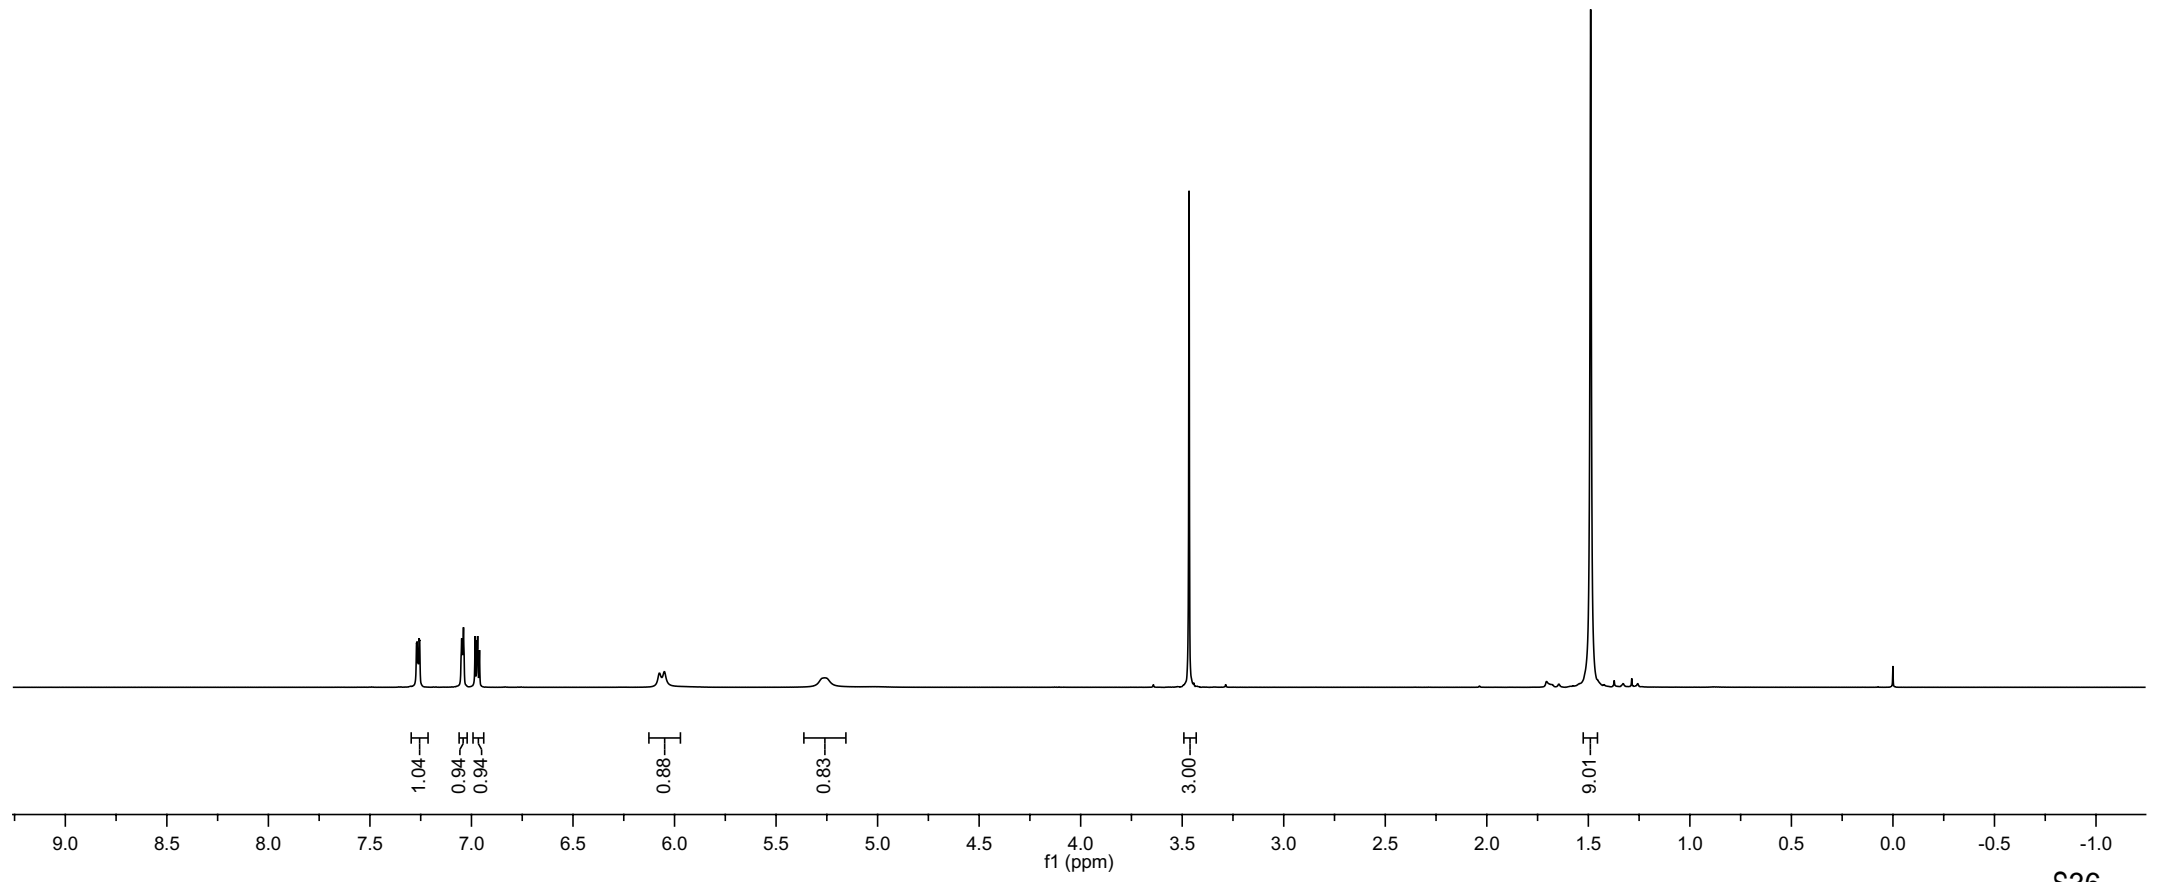

NMR spectra of compound 1s

—155.113

—143.199

—126.893

—125.627

—124.741

—80.767

—80.497

—55.764

—28.414

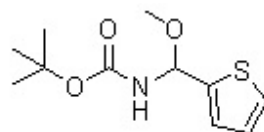

(<sup>13</sup>C NMR, 100 MHz, CDCl<sub>3</sub>)

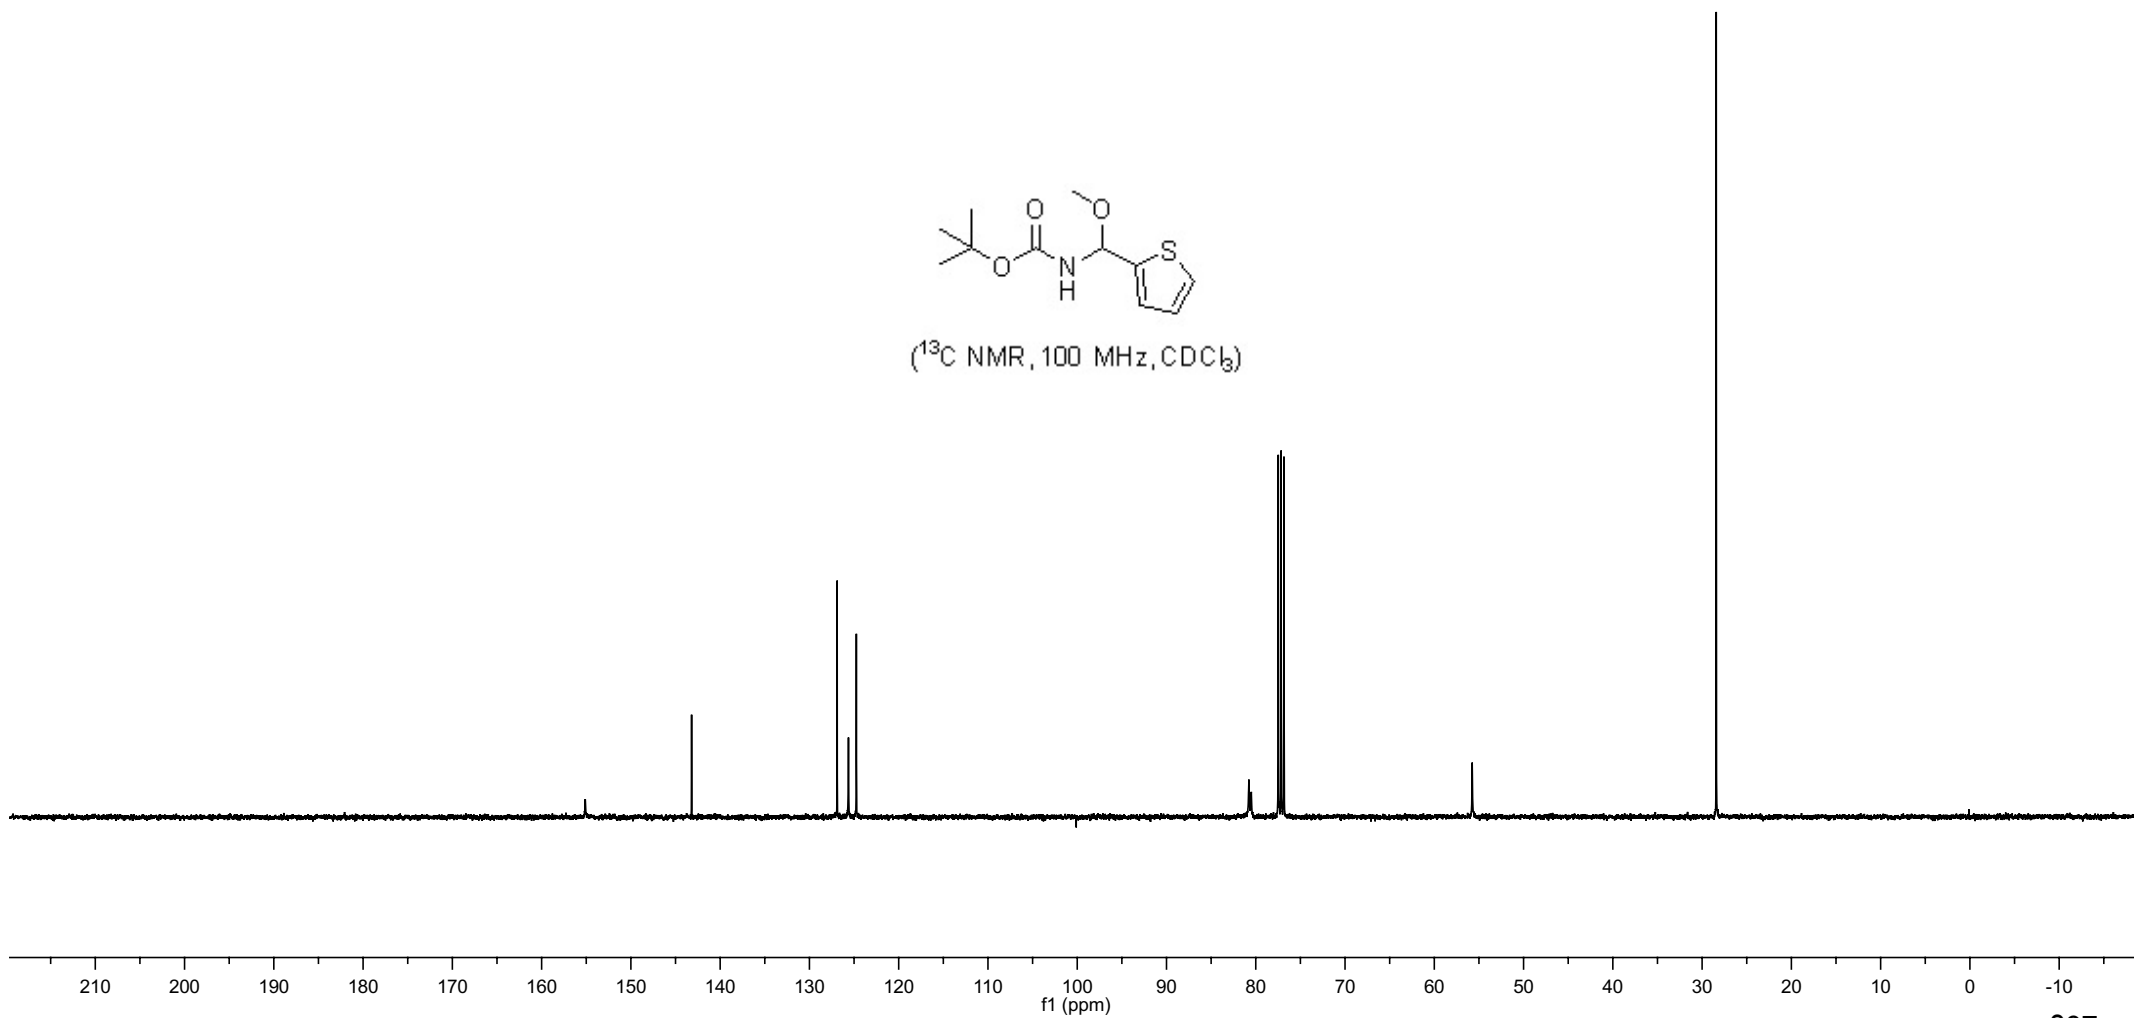

NMR spectra of compound 3aa

8.433

7.669  
7.653  
7.425  
7.407  
7.395  
7.378  
7.361  
7.345  
7.327

6.028  
6.020

5.230  
5.226

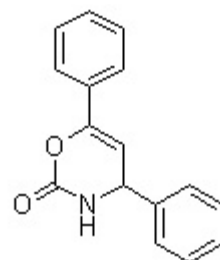

(<sup>1</sup>H NMR, 400 MHz, DMSO-*d*<sub>6</sub>)

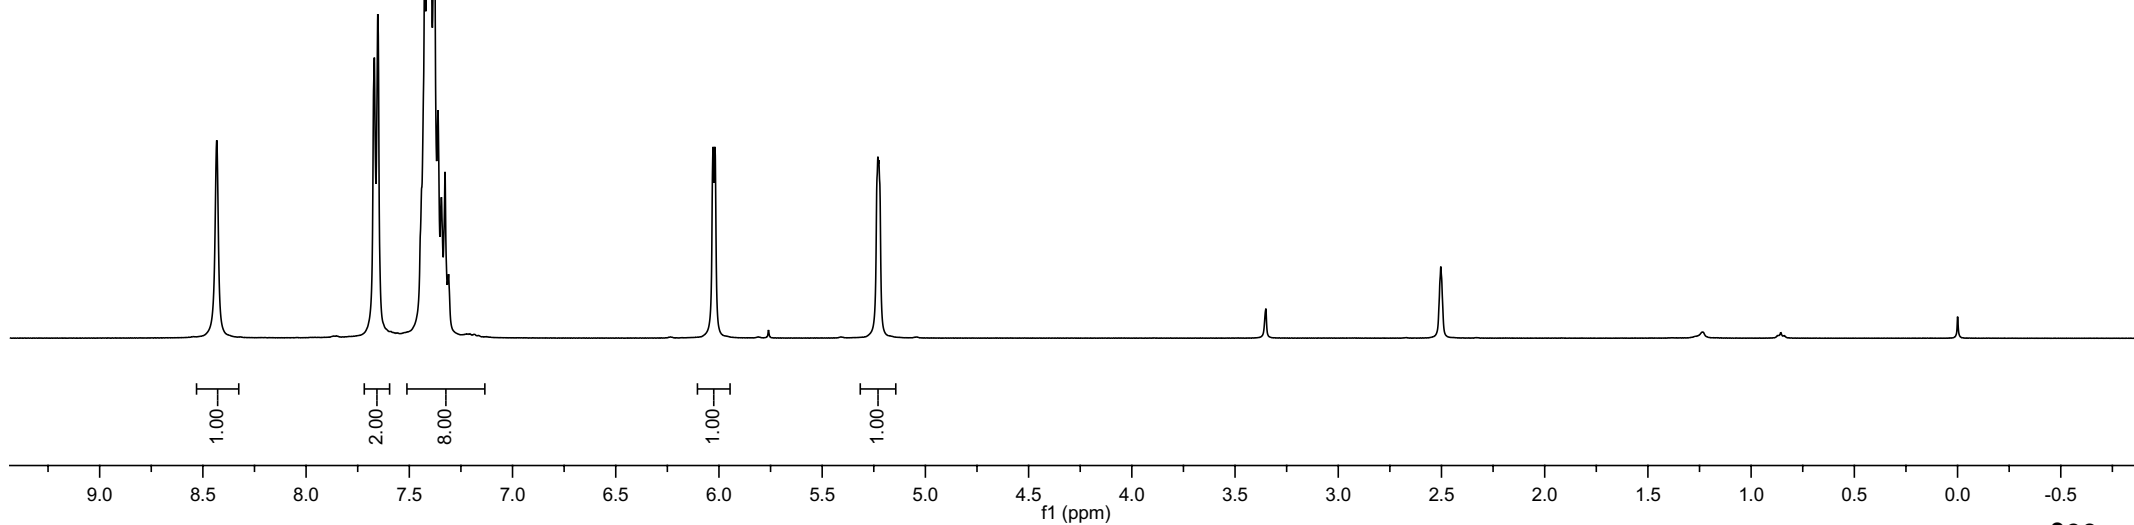

NMR spectra of compound 3aa

—149.137  
—146.106  
—142.679

—131.627  
—129.162  
—128.768  
—128.611  
—127.852  
—126.537  
—124.236

—99.985

—54.084

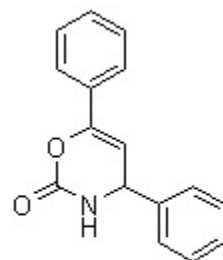

(<sup>13</sup>C NMR, 100 MHz, DMSO-d<sub>6</sub>)

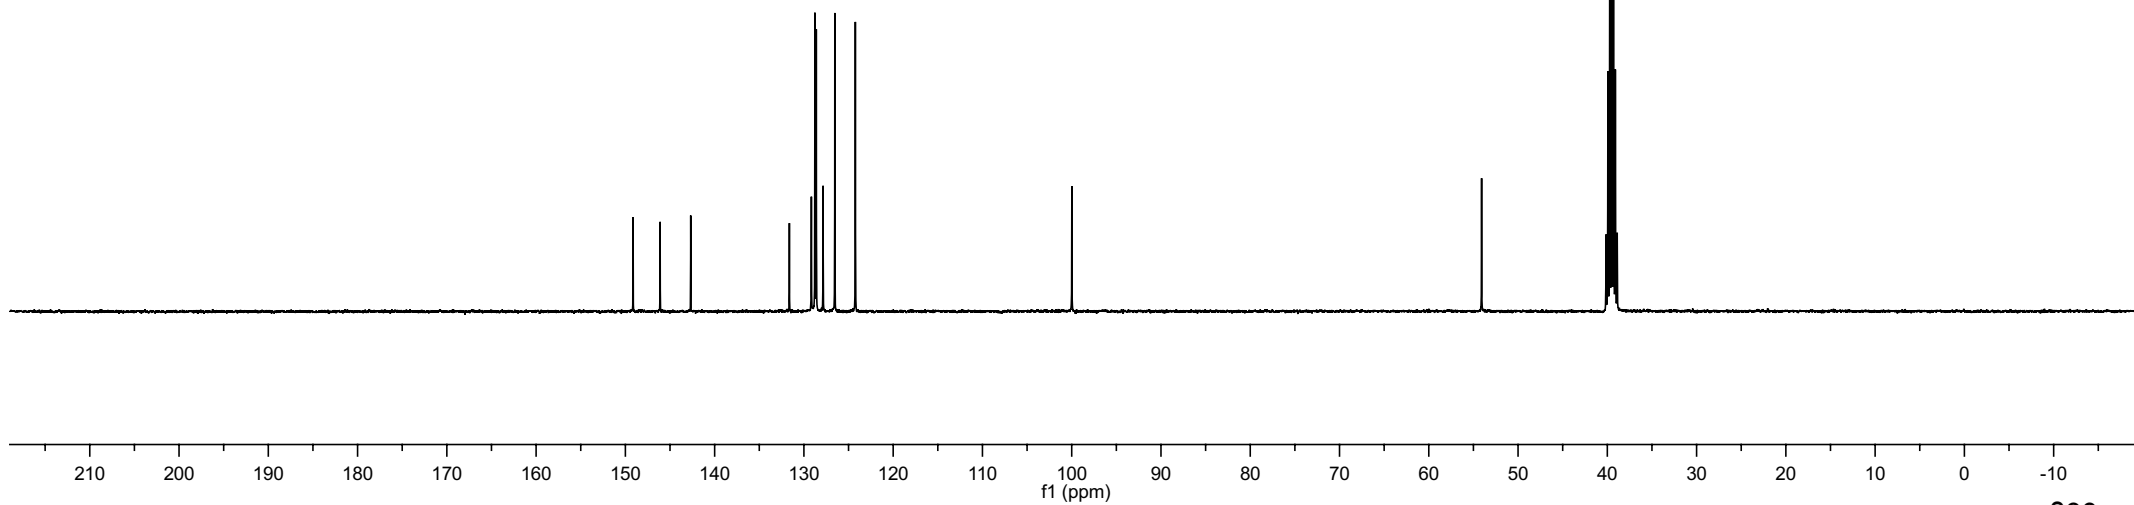

NMR spectra of compound 3ab

8.354

7.599  
7.577  
7.570

7.367  
7.334  
7.299

6.982  
6.960

5.852  
5.849  
5.842  
5.838

5.194  
5.189  
5.184  
5.179

3.778

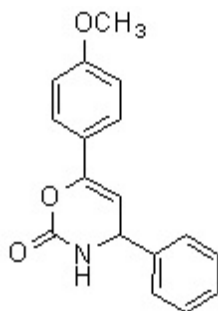

(<sup>1</sup>H NMR, 400Hz, DMSO-d<sub>6</sub>)

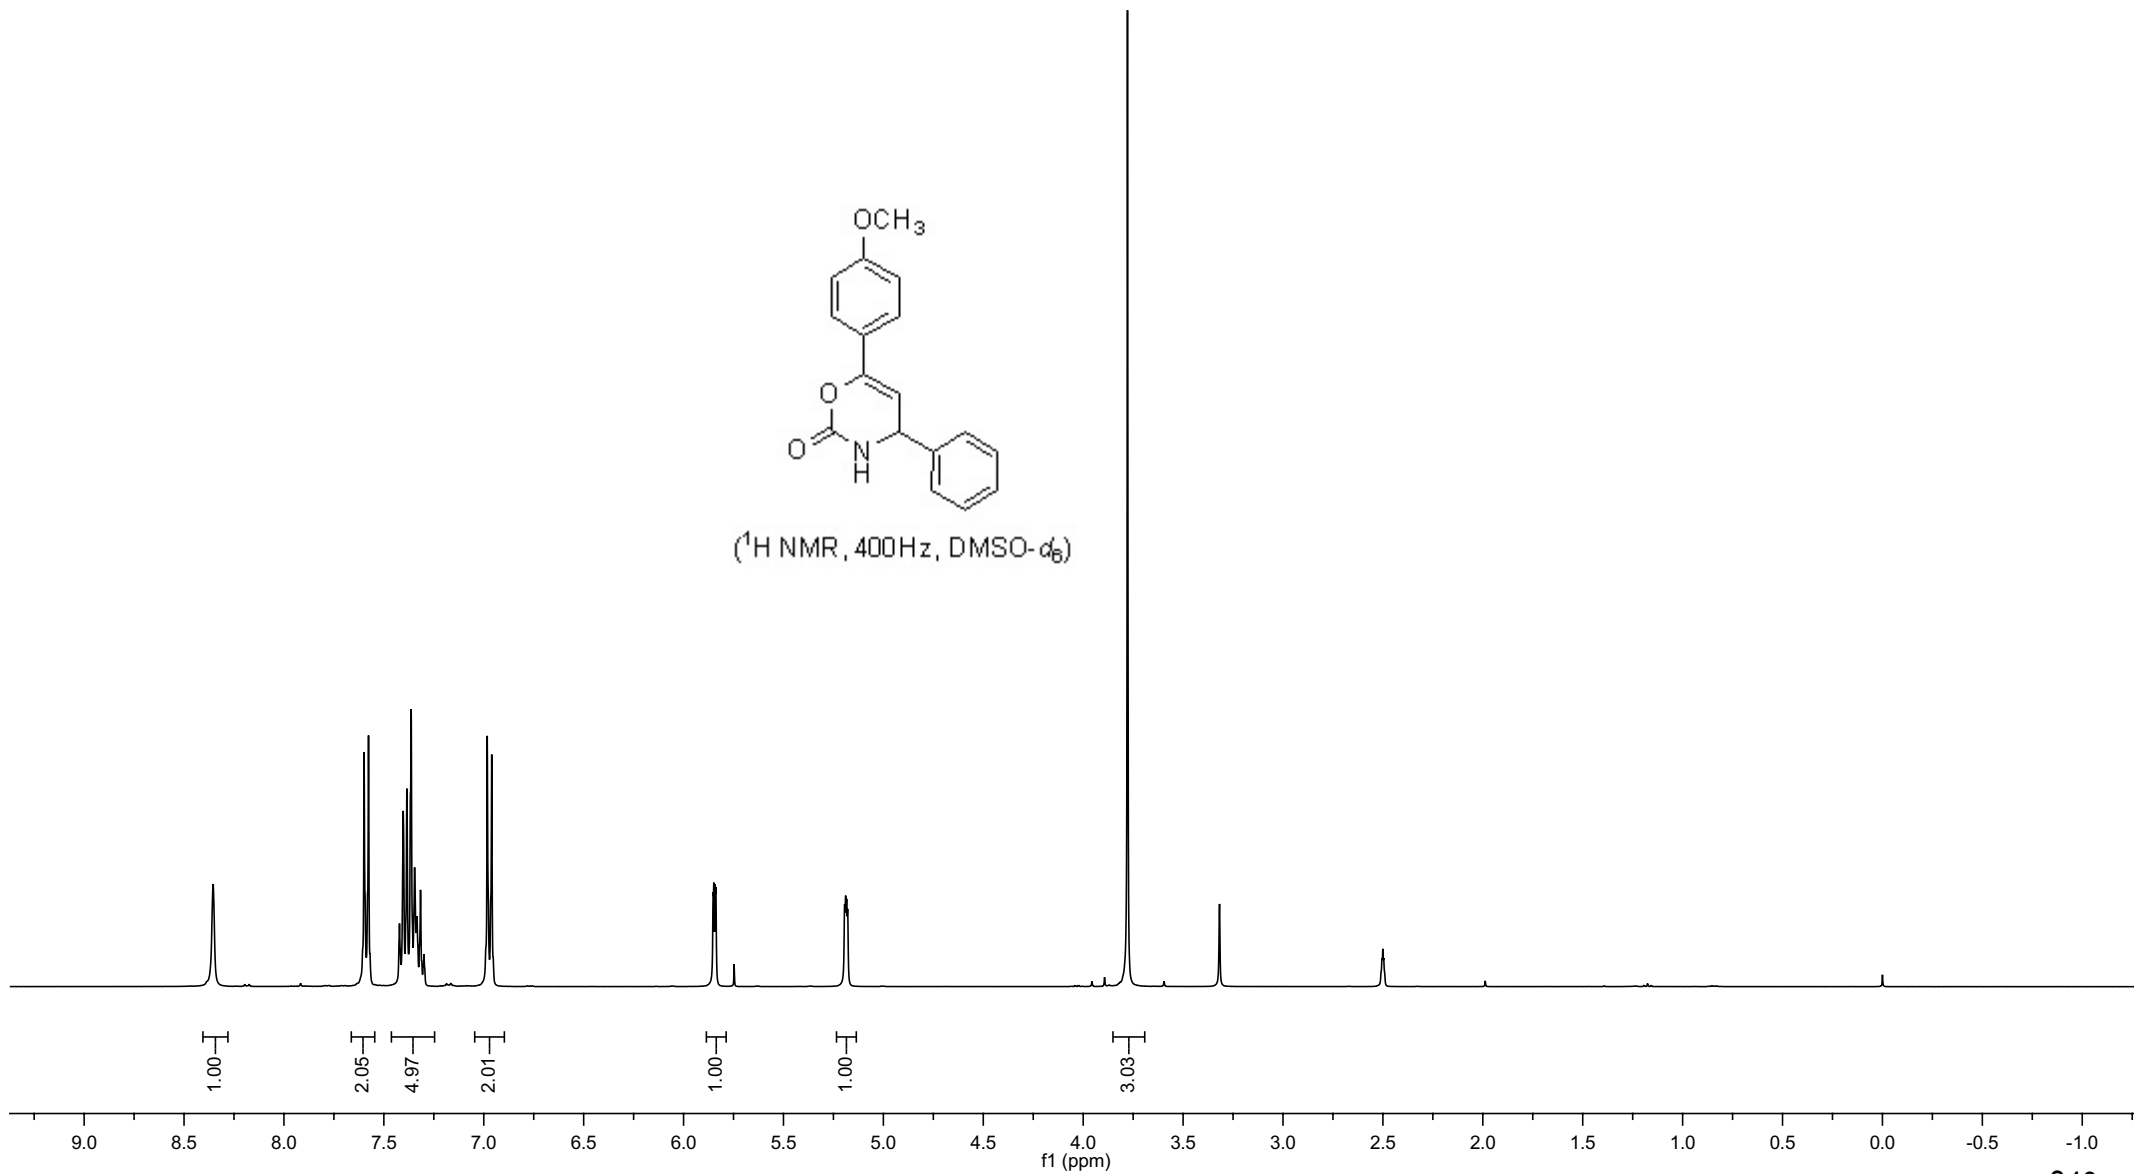



# NMR spectra of compound **3ab**

— 159.962  
— 149.248  
— 146.080  
— 142.916  
  
— 128.725  
— 127.769  
— 126.486  
— 125.785  
— 124.105  
  
— 114.000  
  
— 97.975  
  
— 55.212  
— 54.083

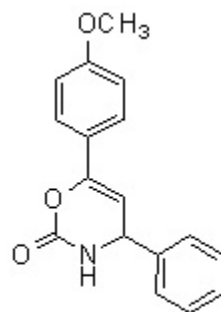

(<sup>13</sup>C NMR, 100Hz, DMSO-*d*<sub>6</sub>)

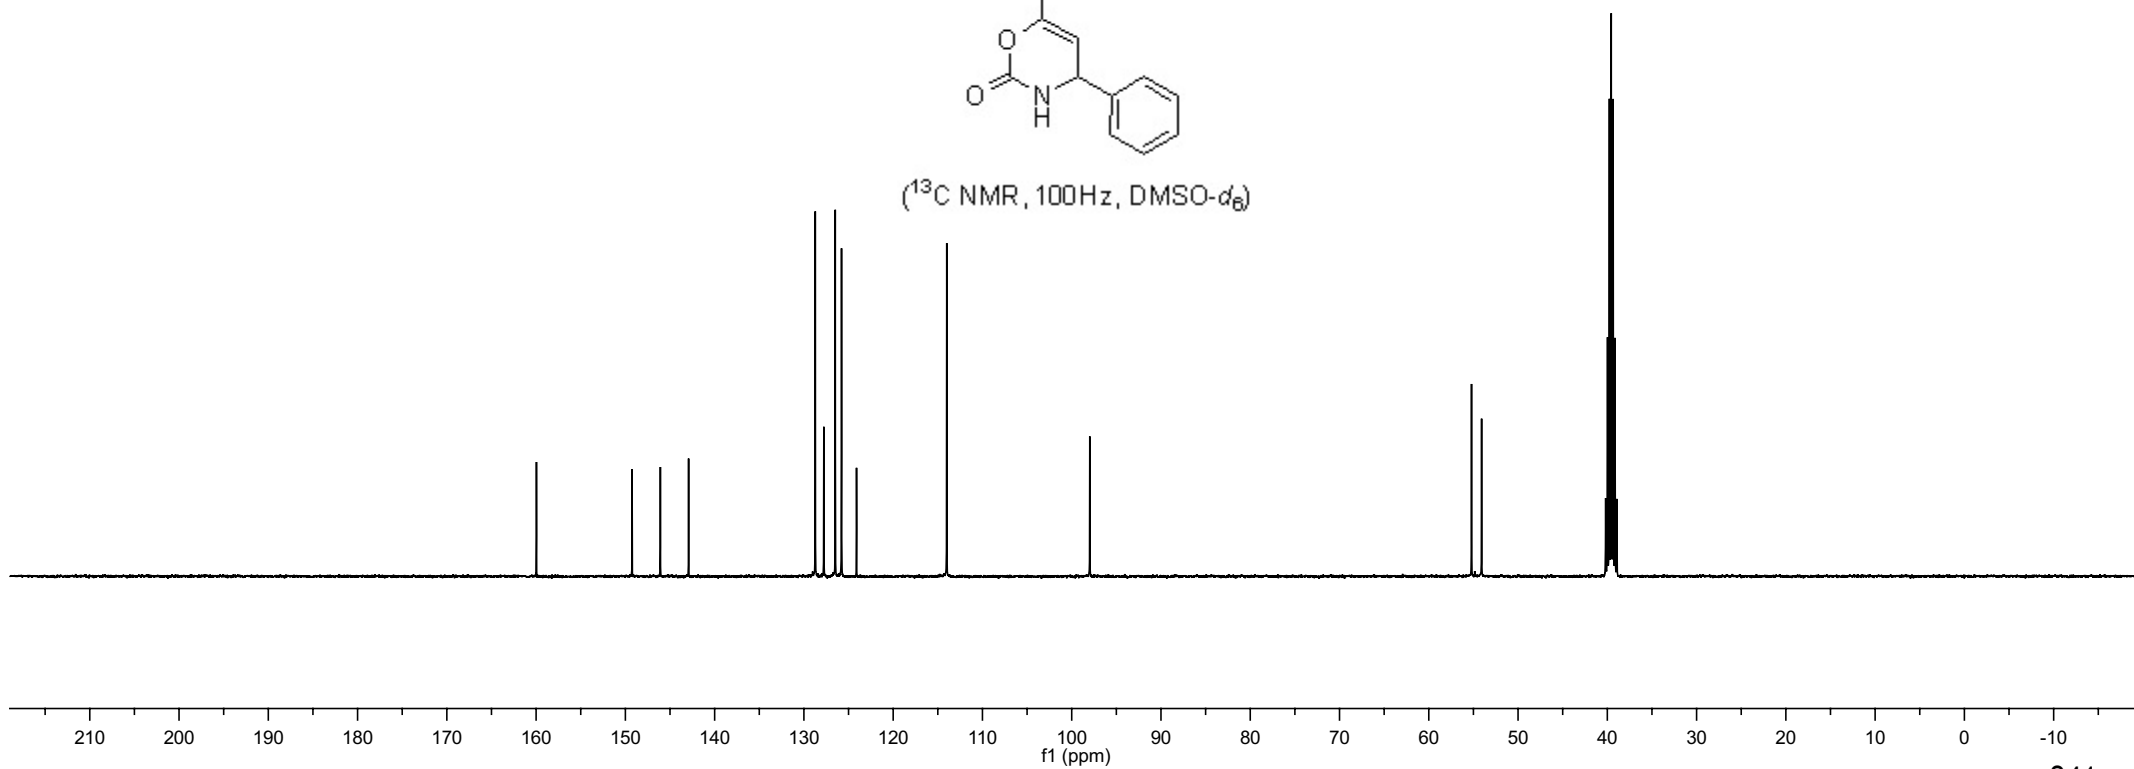

NMR spectra of compound 3ac

8.340

7.579  
7.557

7.359  
7.333  
7.297

6.959  
6.937

5.838  
5.828

5.187  
5.183  
5.178  
5.173

4.071  
4.054  
4.037  
4.019

1.338  
1.321  
1.304

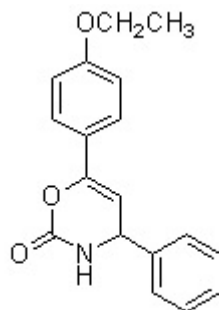

(<sup>1</sup>H NMR, 400 MHz, DMSO-*d*<sub>6</sub>)

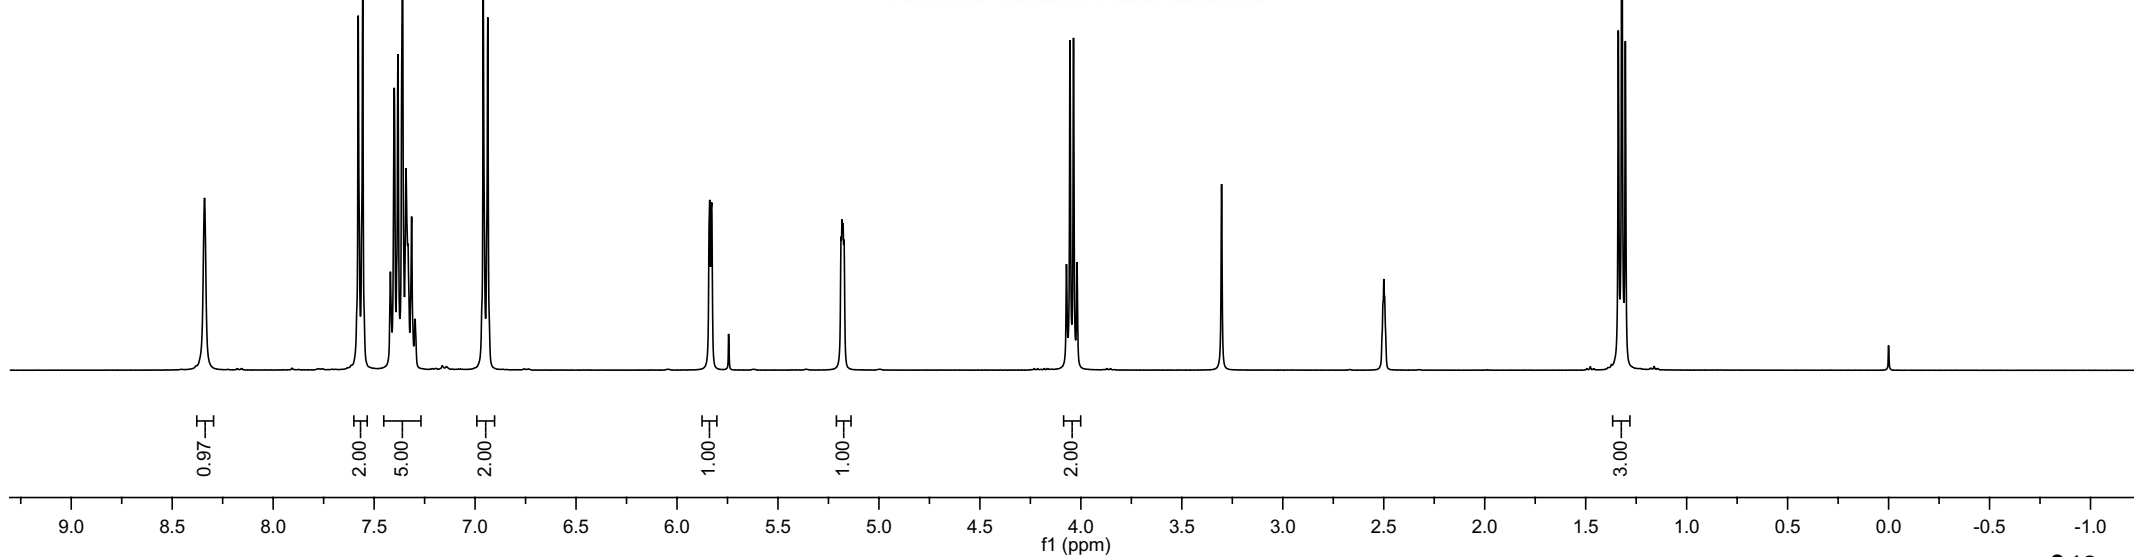

# NMR spectra of compound 3ac

— 159.236  
— 149.249  
— 146.127  
— 142.928  
  
— 128.717  
— 127.758  
— 126.476  
— 125.784  
— 123.964  
  
— 114.448  
  
— 97.905  
  
— 63.175  
— 54.076  
  
— 14.522

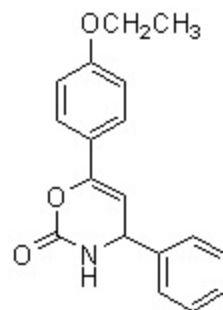

(<sup>13</sup>C NMR, 100 MHz, DMSO-*d*<sub>6</sub>)

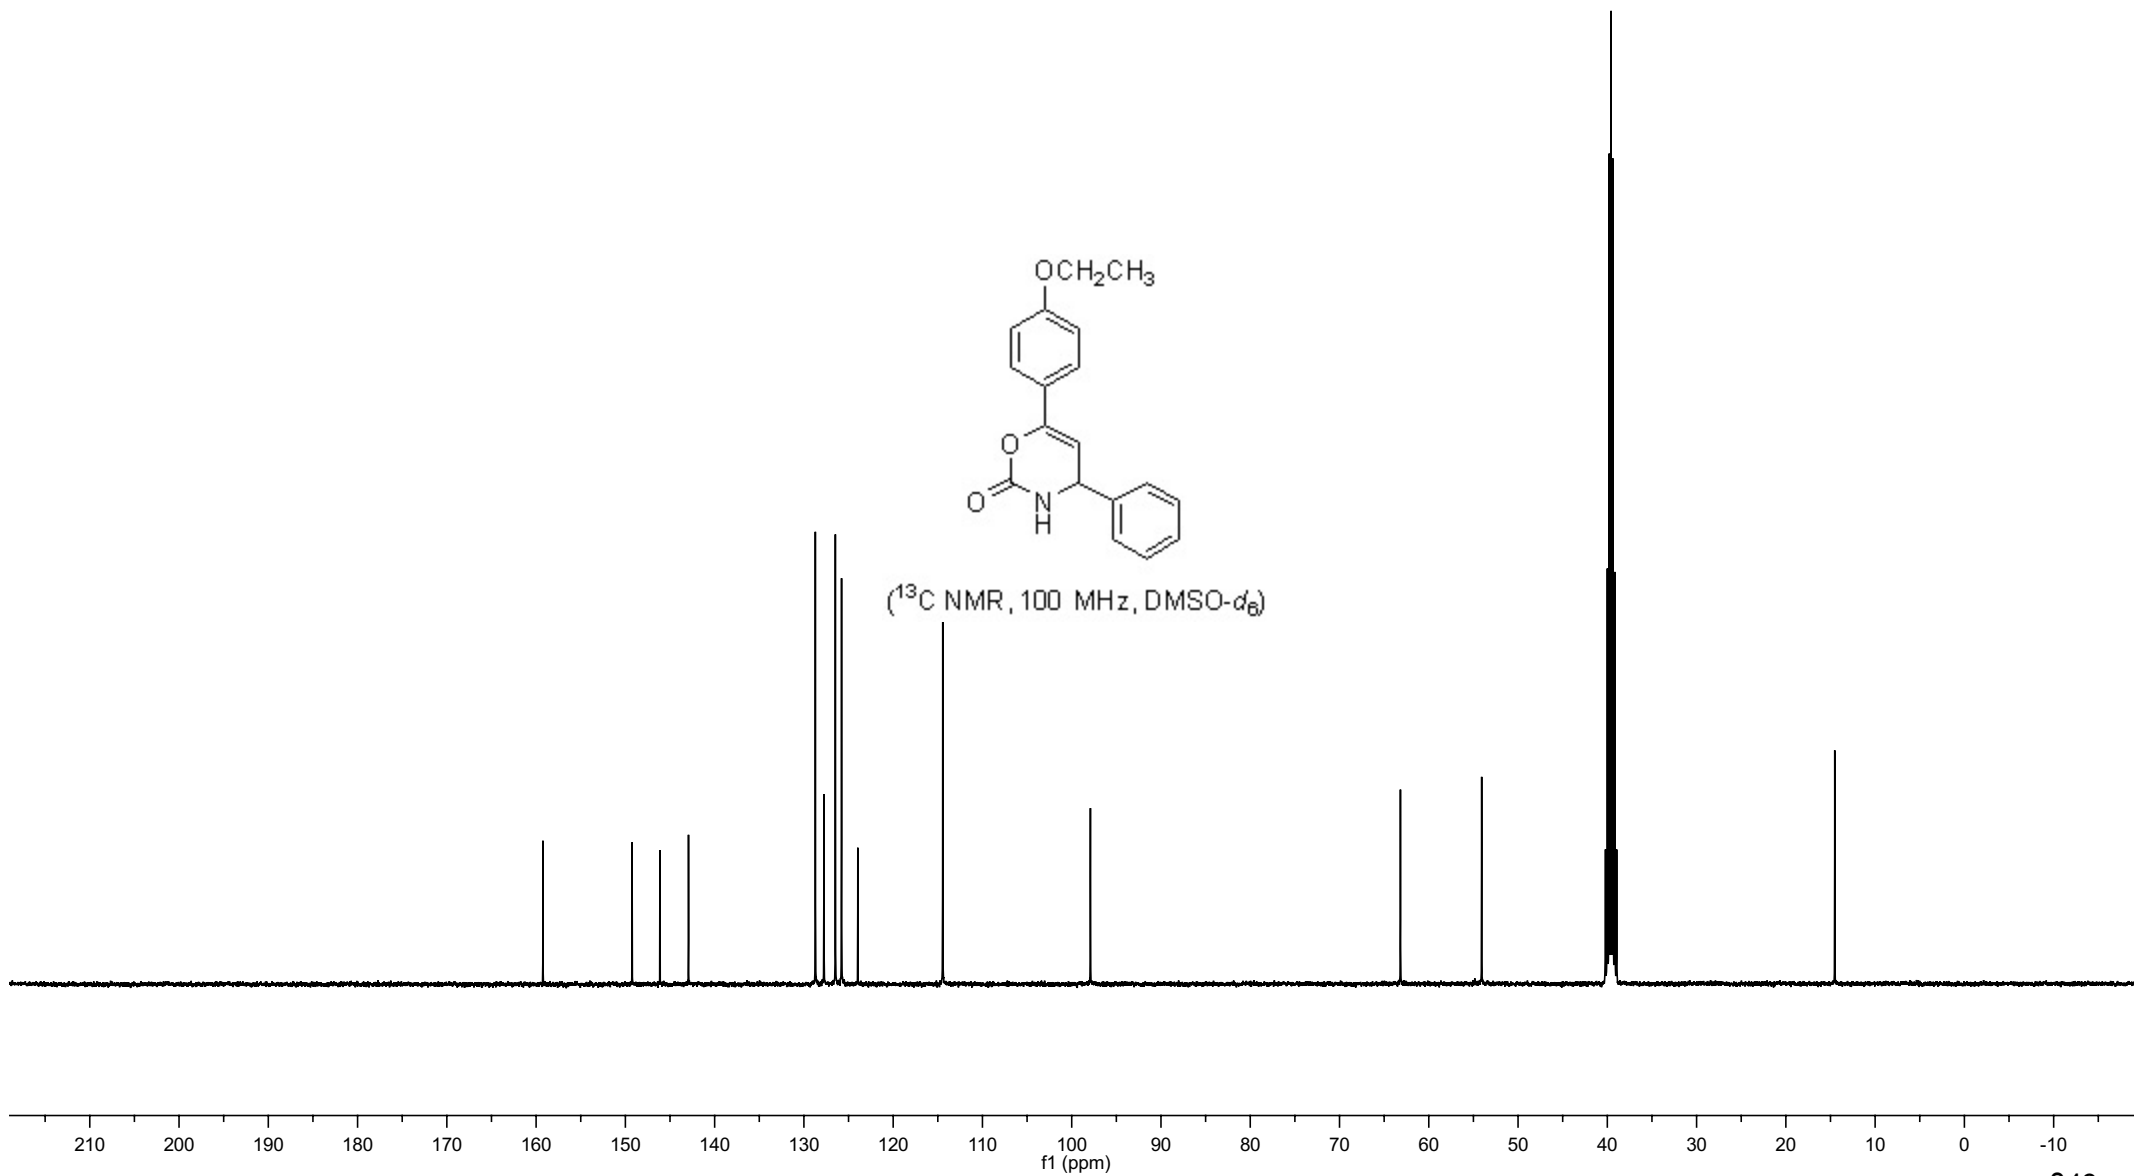

NMR spectra of compound 3ad

8.395

7.566  
7.546  
7.440  
7.421  
7.403  
7.377  
7.358  
7.336  
7.252  
7.232

5.962  
5.954

5.218

2.333

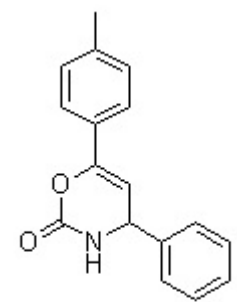

(<sup>1</sup>H NMR, 400 MHz, DMSO-d<sub>6</sub>)

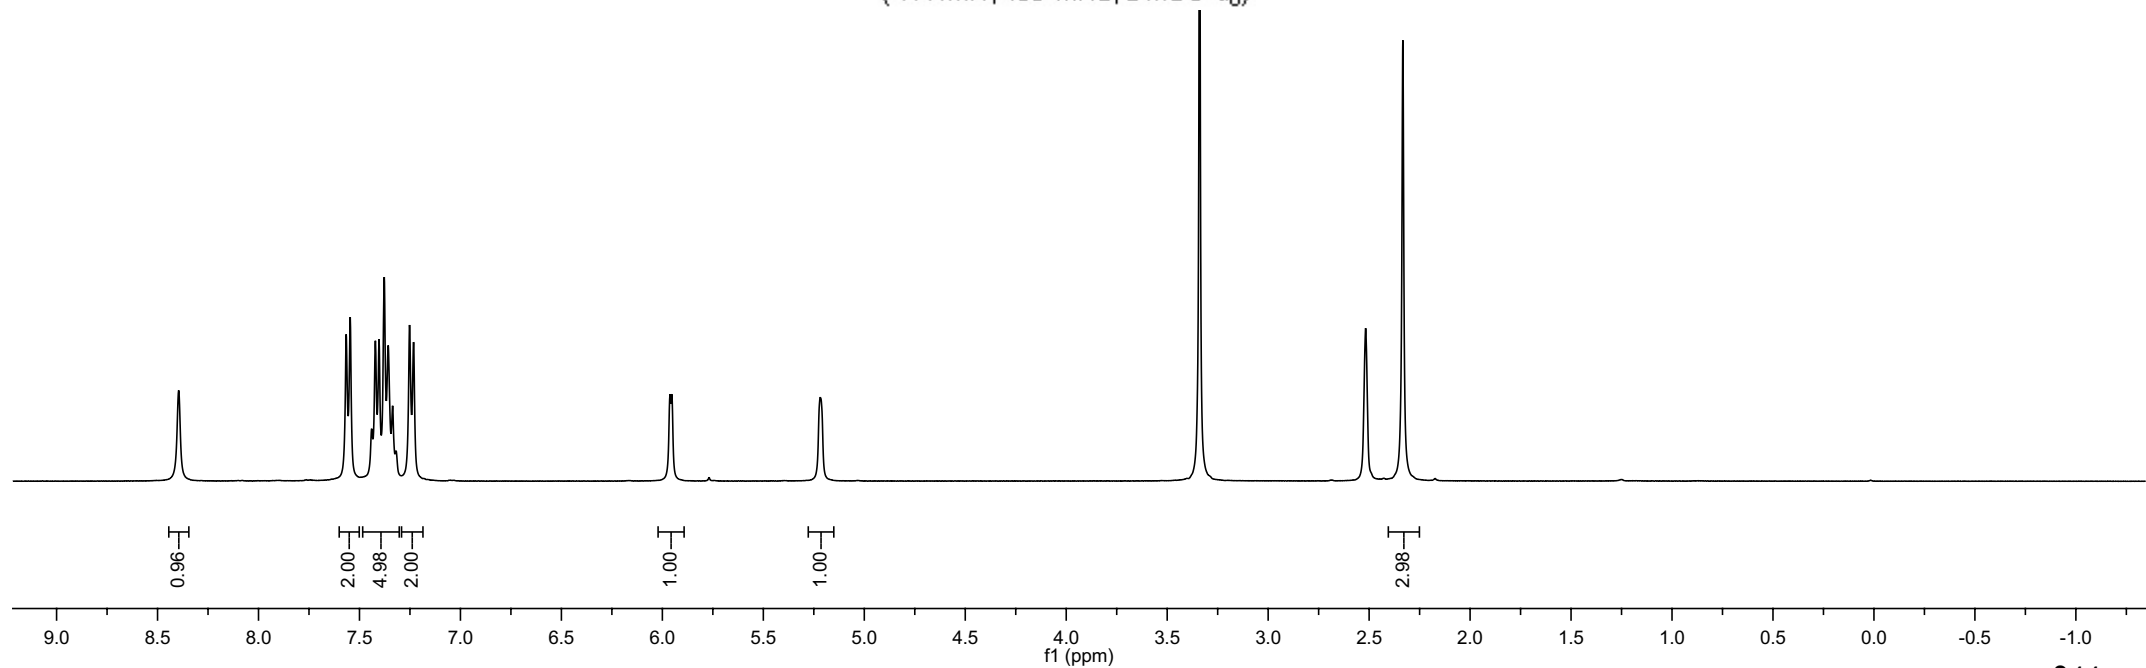

NMR spectra of compound **3ad**

— 149.198  
— 146.175  
— 142.786  
— 138.737  
— 129.165  
— 128.881  
— 128.749  
— 127.804  
— 126.485  
— 124.173

— 99.085

— 54.045

— 20.769

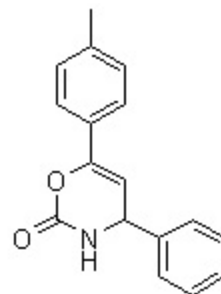

(<sup>13</sup>C NMR, 100 MHz, DMSO-*d*<sub>6</sub>)

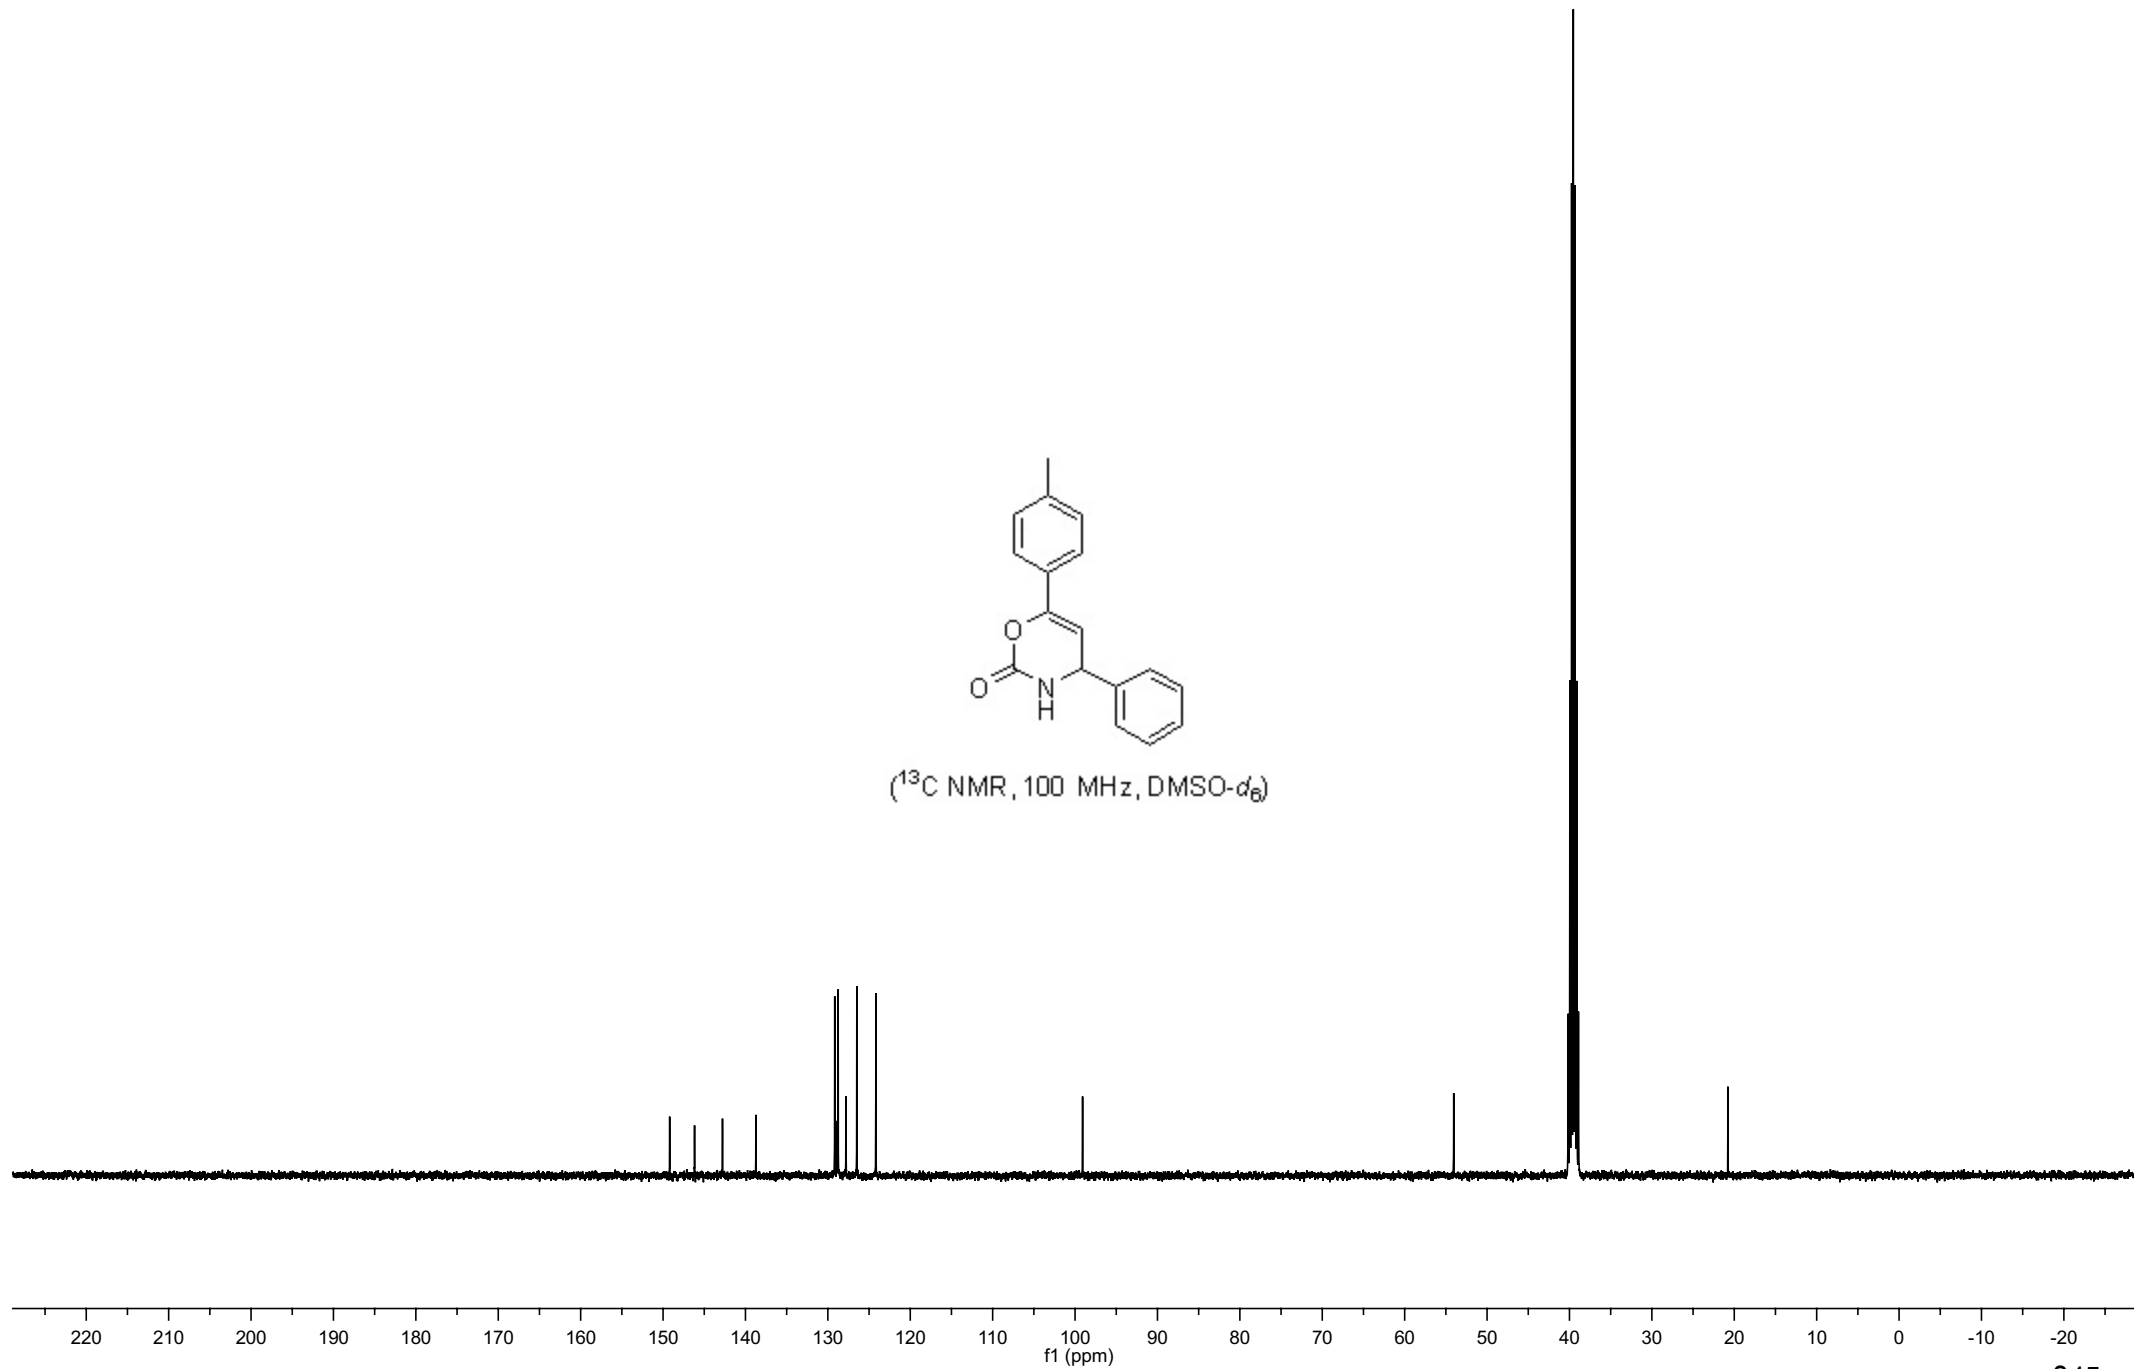

NMR spectra of compound 3ae

7.547  
7.526  
7.317  
7.183  
7.162

6.252

5.560  
5.556  
5.551  
5.547  
5.216  
5.210

2.627  
2.608  
2.589

1.623  
1.605  
1.585  
1.567  
1.547  
1.349  
1.312  
0.934  
0.915  
0.897

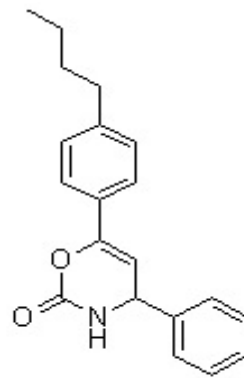

(<sup>1</sup>H NMR, 400 MHz, CDCl<sub>3</sub>)

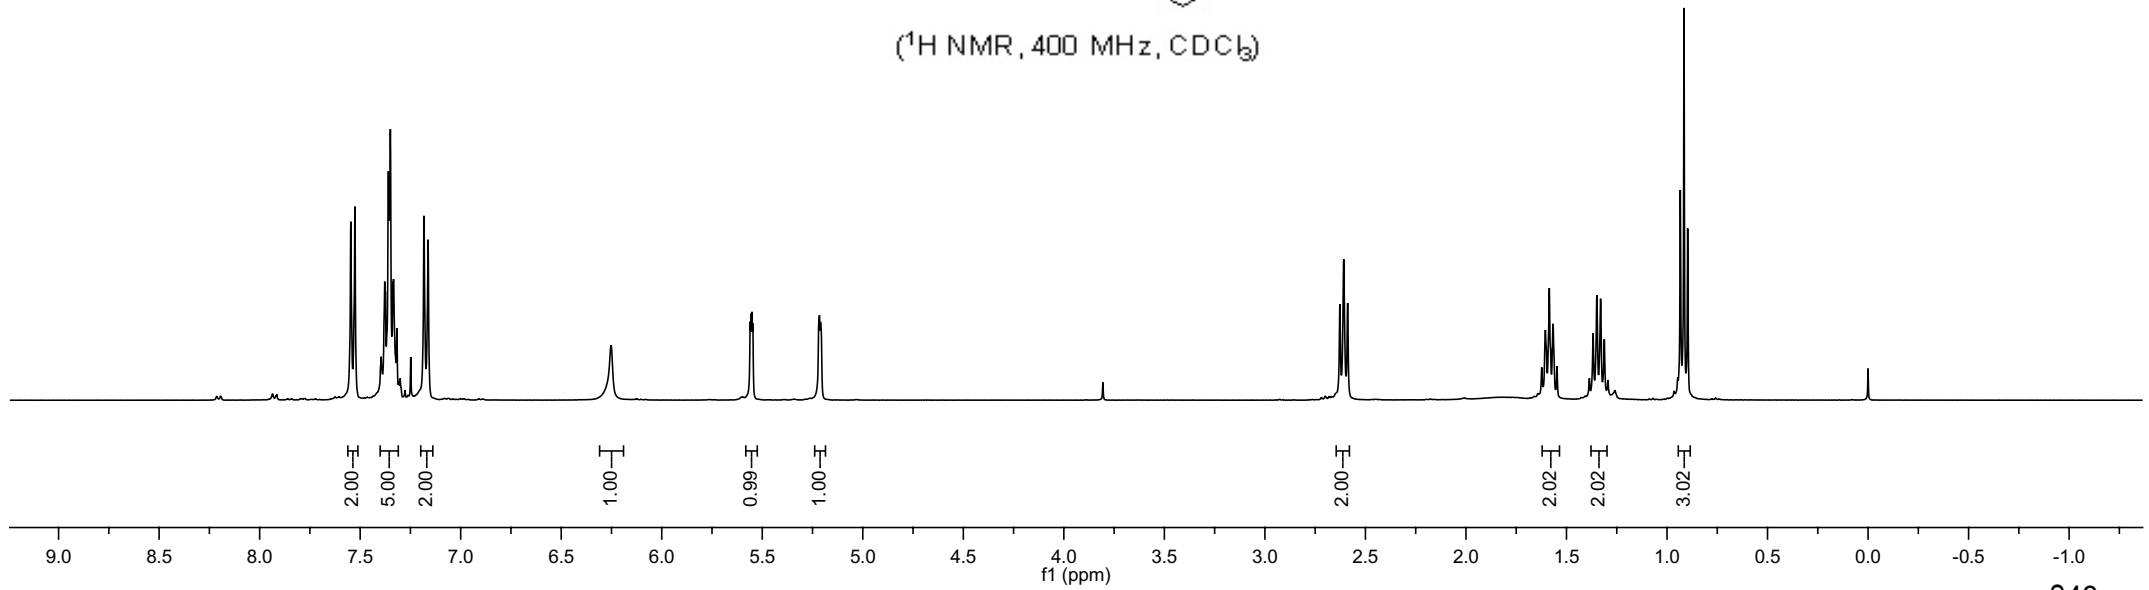

NMR spectra of compound **3ae**

— 150.489  
— 147.744  
— 144.619  
— 141.682

— 129.159  
— 128.956  
— 128.617  
— 128.567  
— 126.717  
— 124.723

— 97.959

— 55.776

— 35.393  
— 33.389

— 22.290

— 13.879

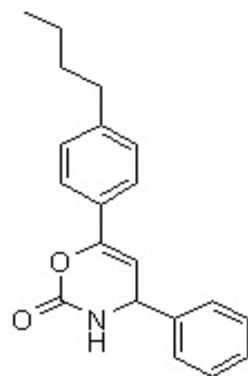

(<sup>13</sup>C NMR, 100 MHz, CDCl<sub>3</sub>)

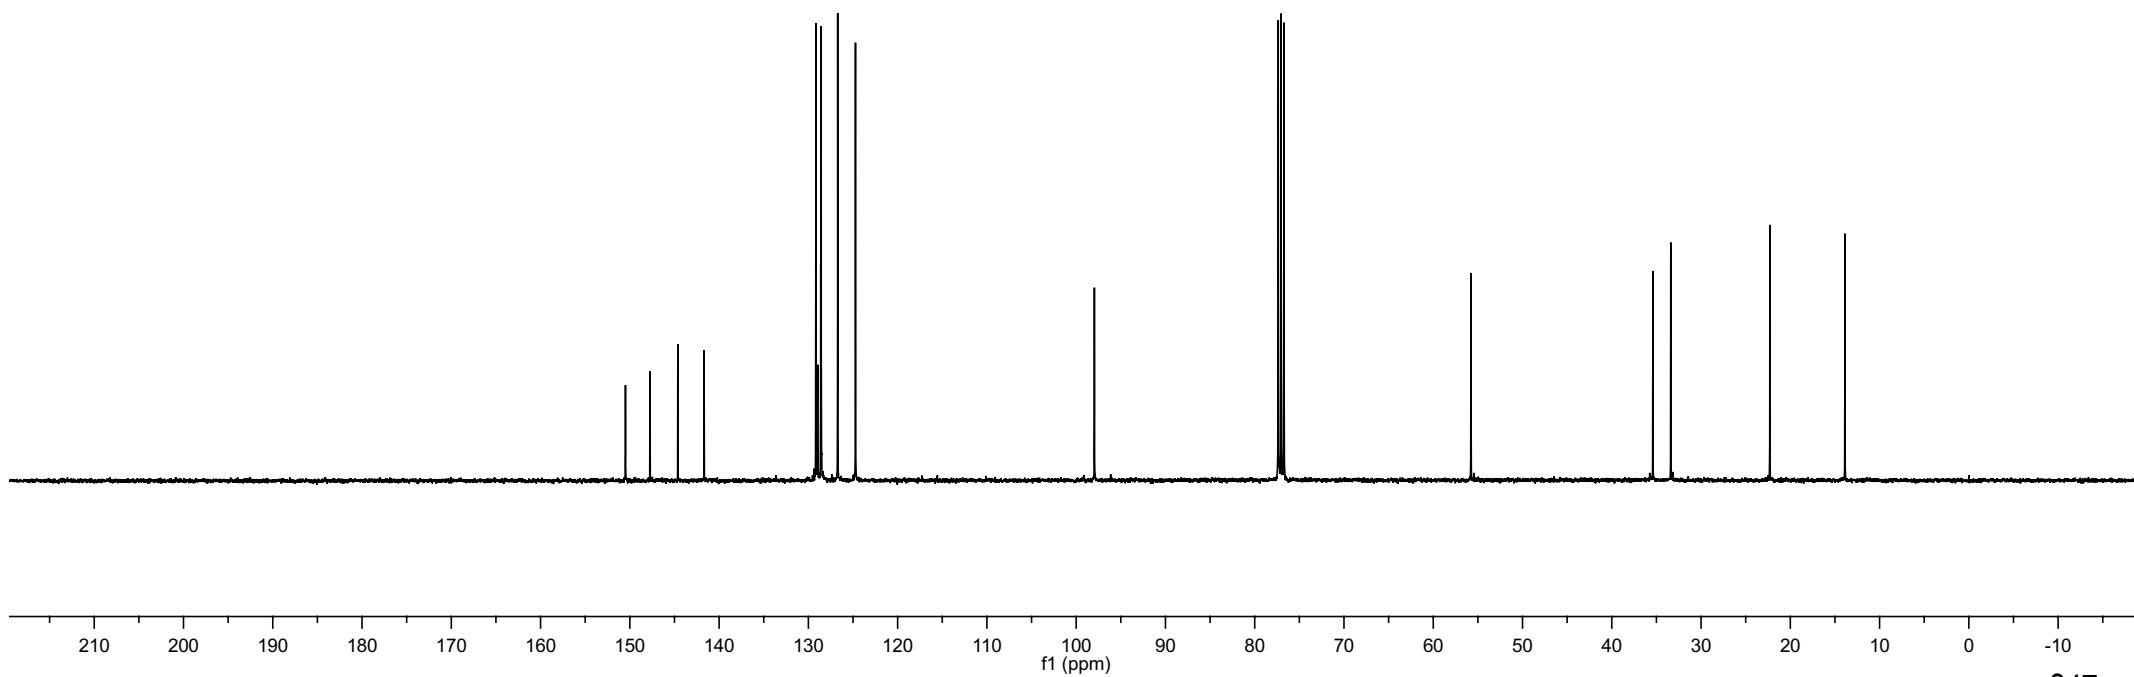

# NMR spectra of compound 3af

7.580  
7.576  
7.564  
7.559  
7.395  
7.374  
7.353  
7.340  
7.331  
7.249  
6.286  
5.579  
5.574  
5.570  
5.565  
5.227  
5.224  
5.218  
5.215

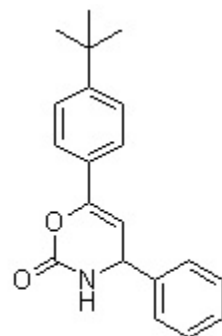

(<sup>1</sup>H NMR, 400 MHz, CDCl<sub>3</sub>)

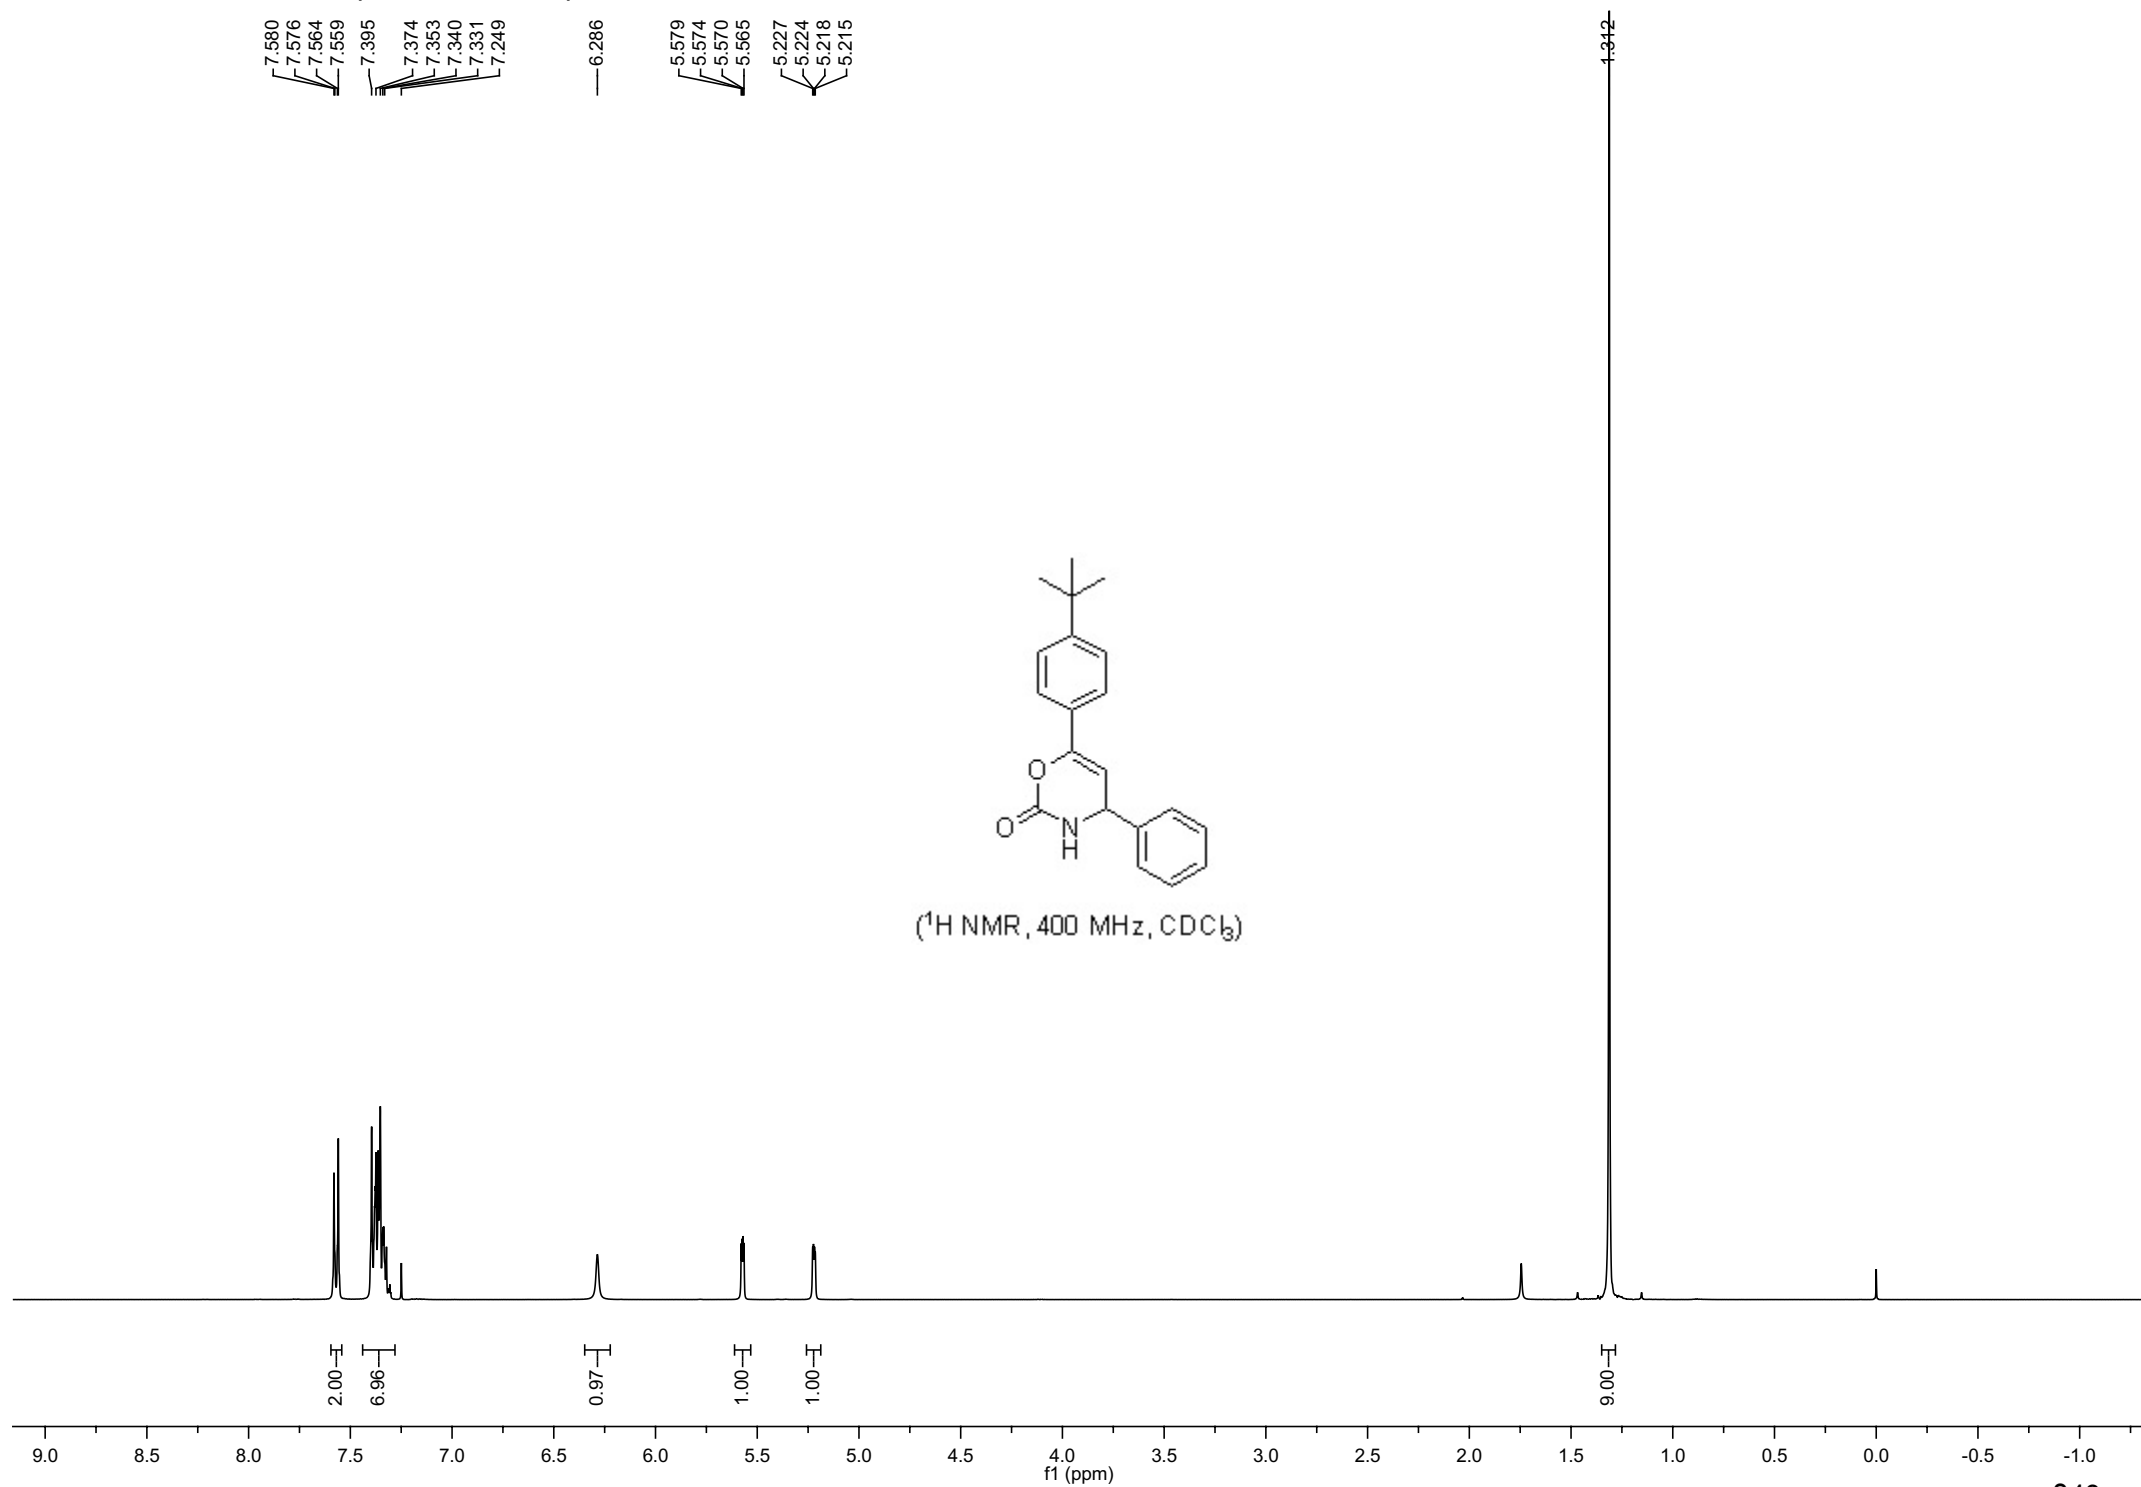



NMR spectra of compound 3af

152.814  
150.497  
147.679  
141.706  
129.156  
128.741  
128.614  
126.741  
125.453  
124.558

98.071

55.767

34.736  
31.204

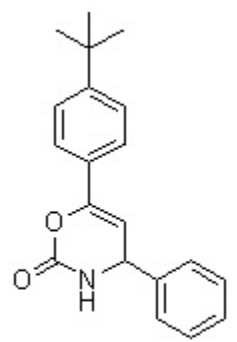

(<sup>13</sup>C NMR, 100 MHz, CDCl<sub>3</sub>)

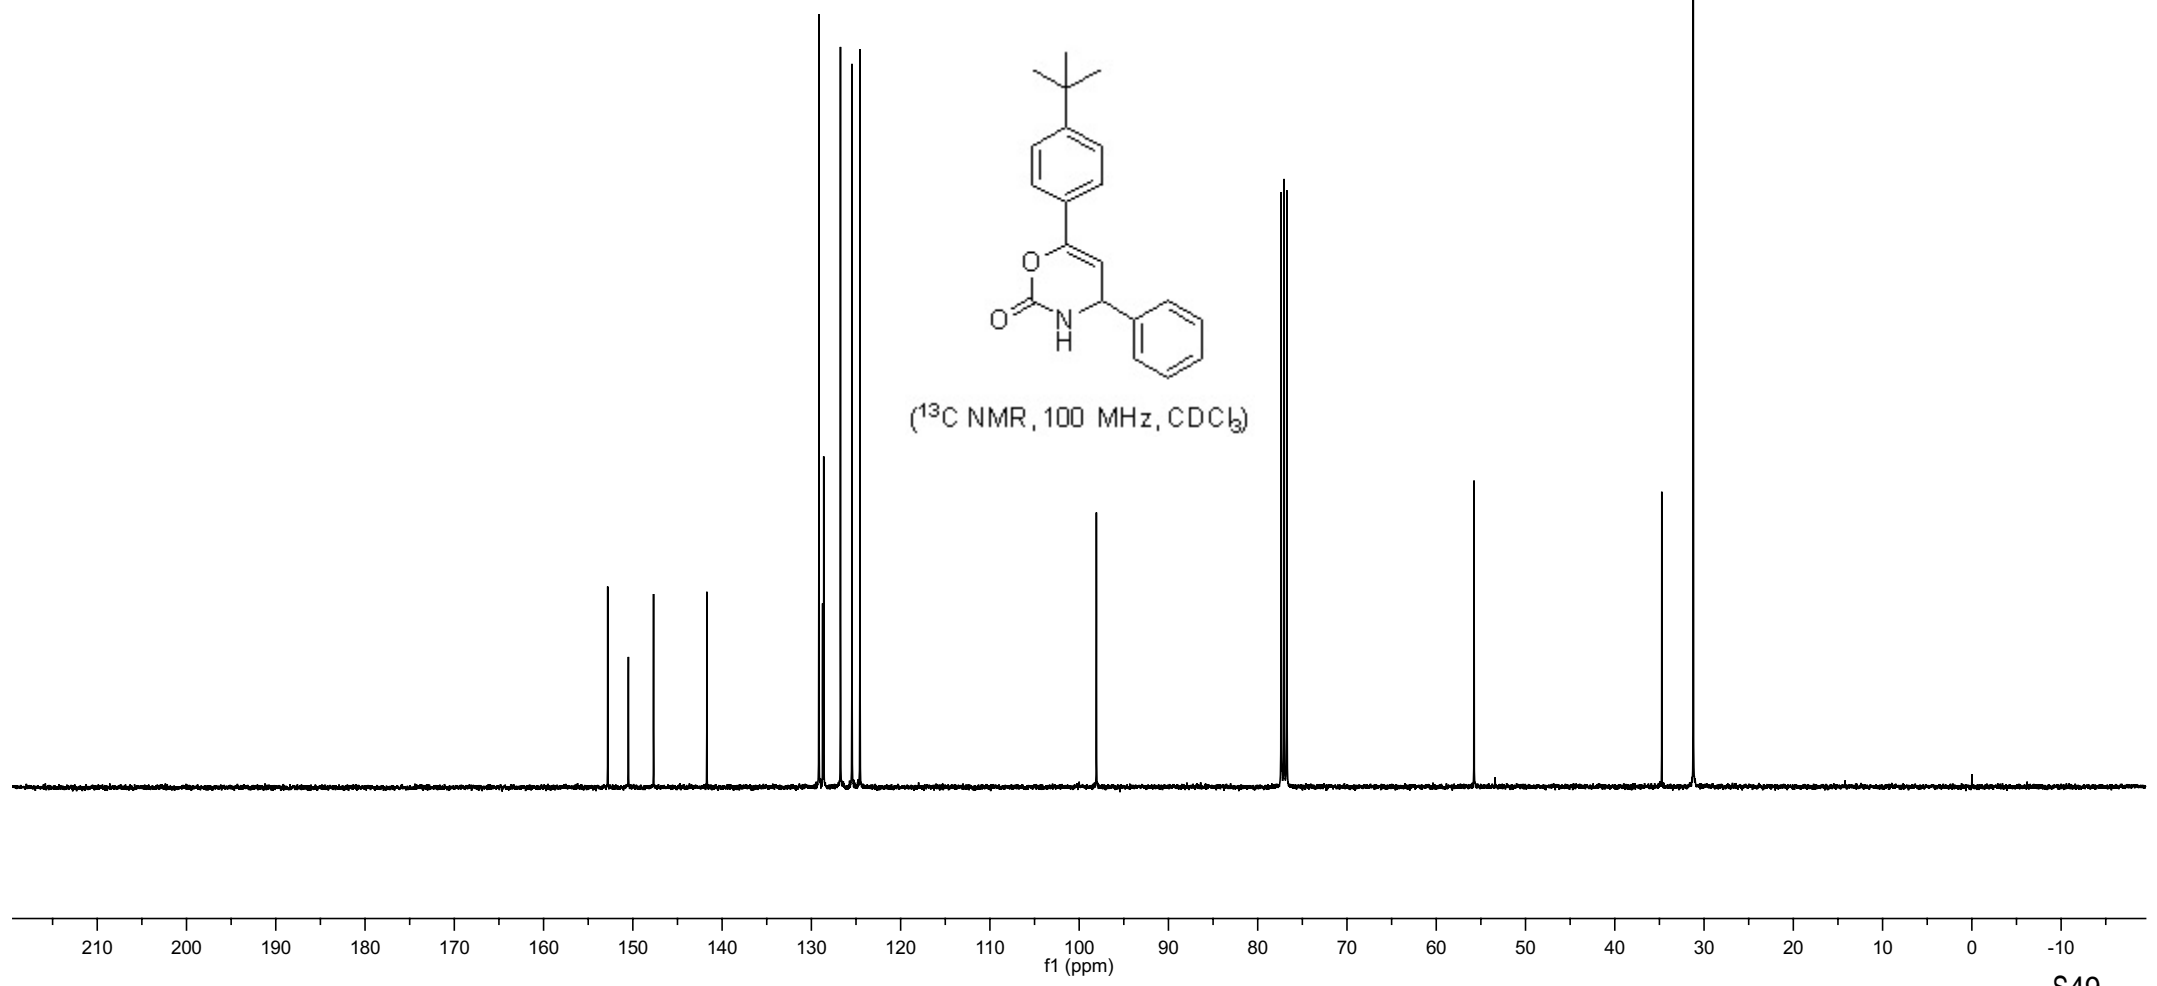

NMR spectra of compound 3ag

8.439  
7.693  
7.671  
7.490  
7.374  
7.356  
7.349  
7.346  
7.328  
7.314  
7.310  
6.093  
6.083  
5.238  
5.233  
5.228  
5.223

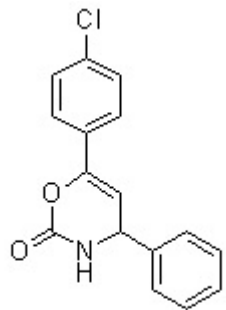

(<sup>1</sup>H NMR, 400 MHz, DMSO-*d*<sub>6</sub>)

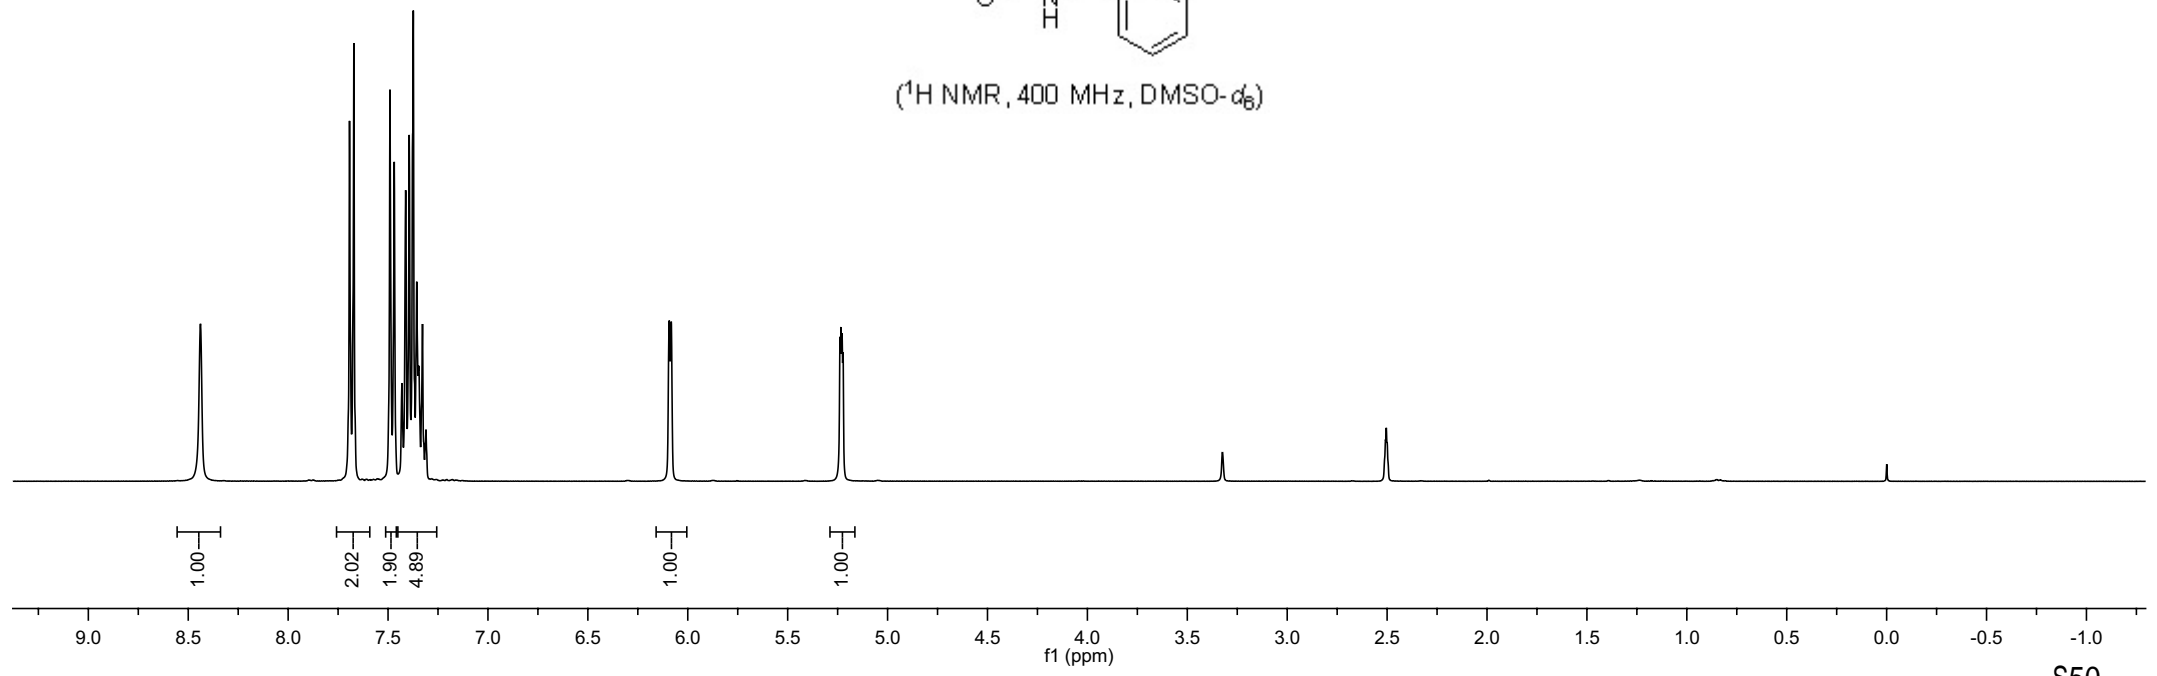

NMR spectra of compound 3ag

— 148.907  
— 145.140  
— 142.473  
  
— 133.711  
— 130.514  
— 128.769  
— 128.654  
— 127.882  
— 126.545  
— 126.063  
  
— 100.701  
  
— 54.095

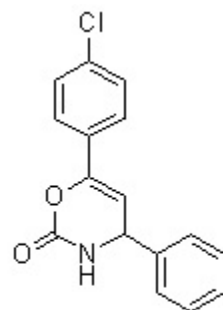

(<sup>13</sup>C NMR, 100 MHz, DMSO-*d*<sub>6</sub>)

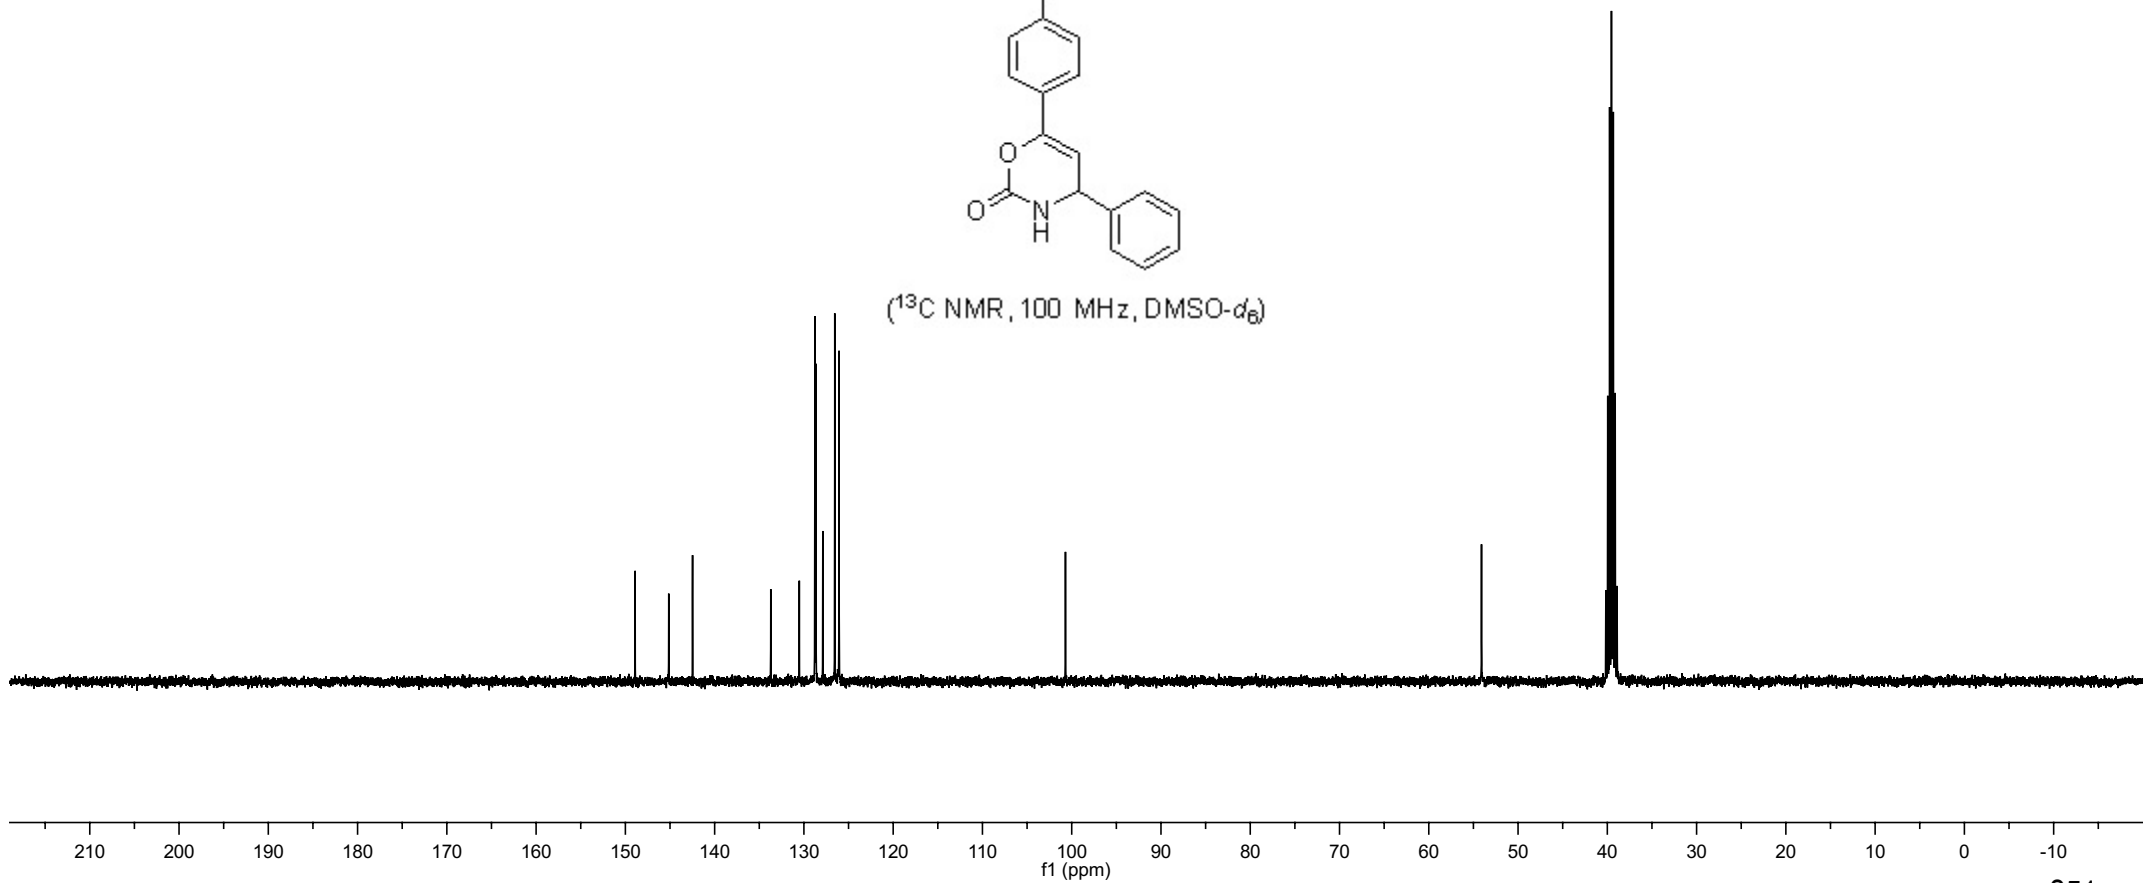

NMR spectra of compound 3ah

8.443

7.615

7.398

7.374

7.353

7.345

7.328

7.314

7.307

6.110

6.106

6.099

6.096

5.230

5.225

5.220

5.215

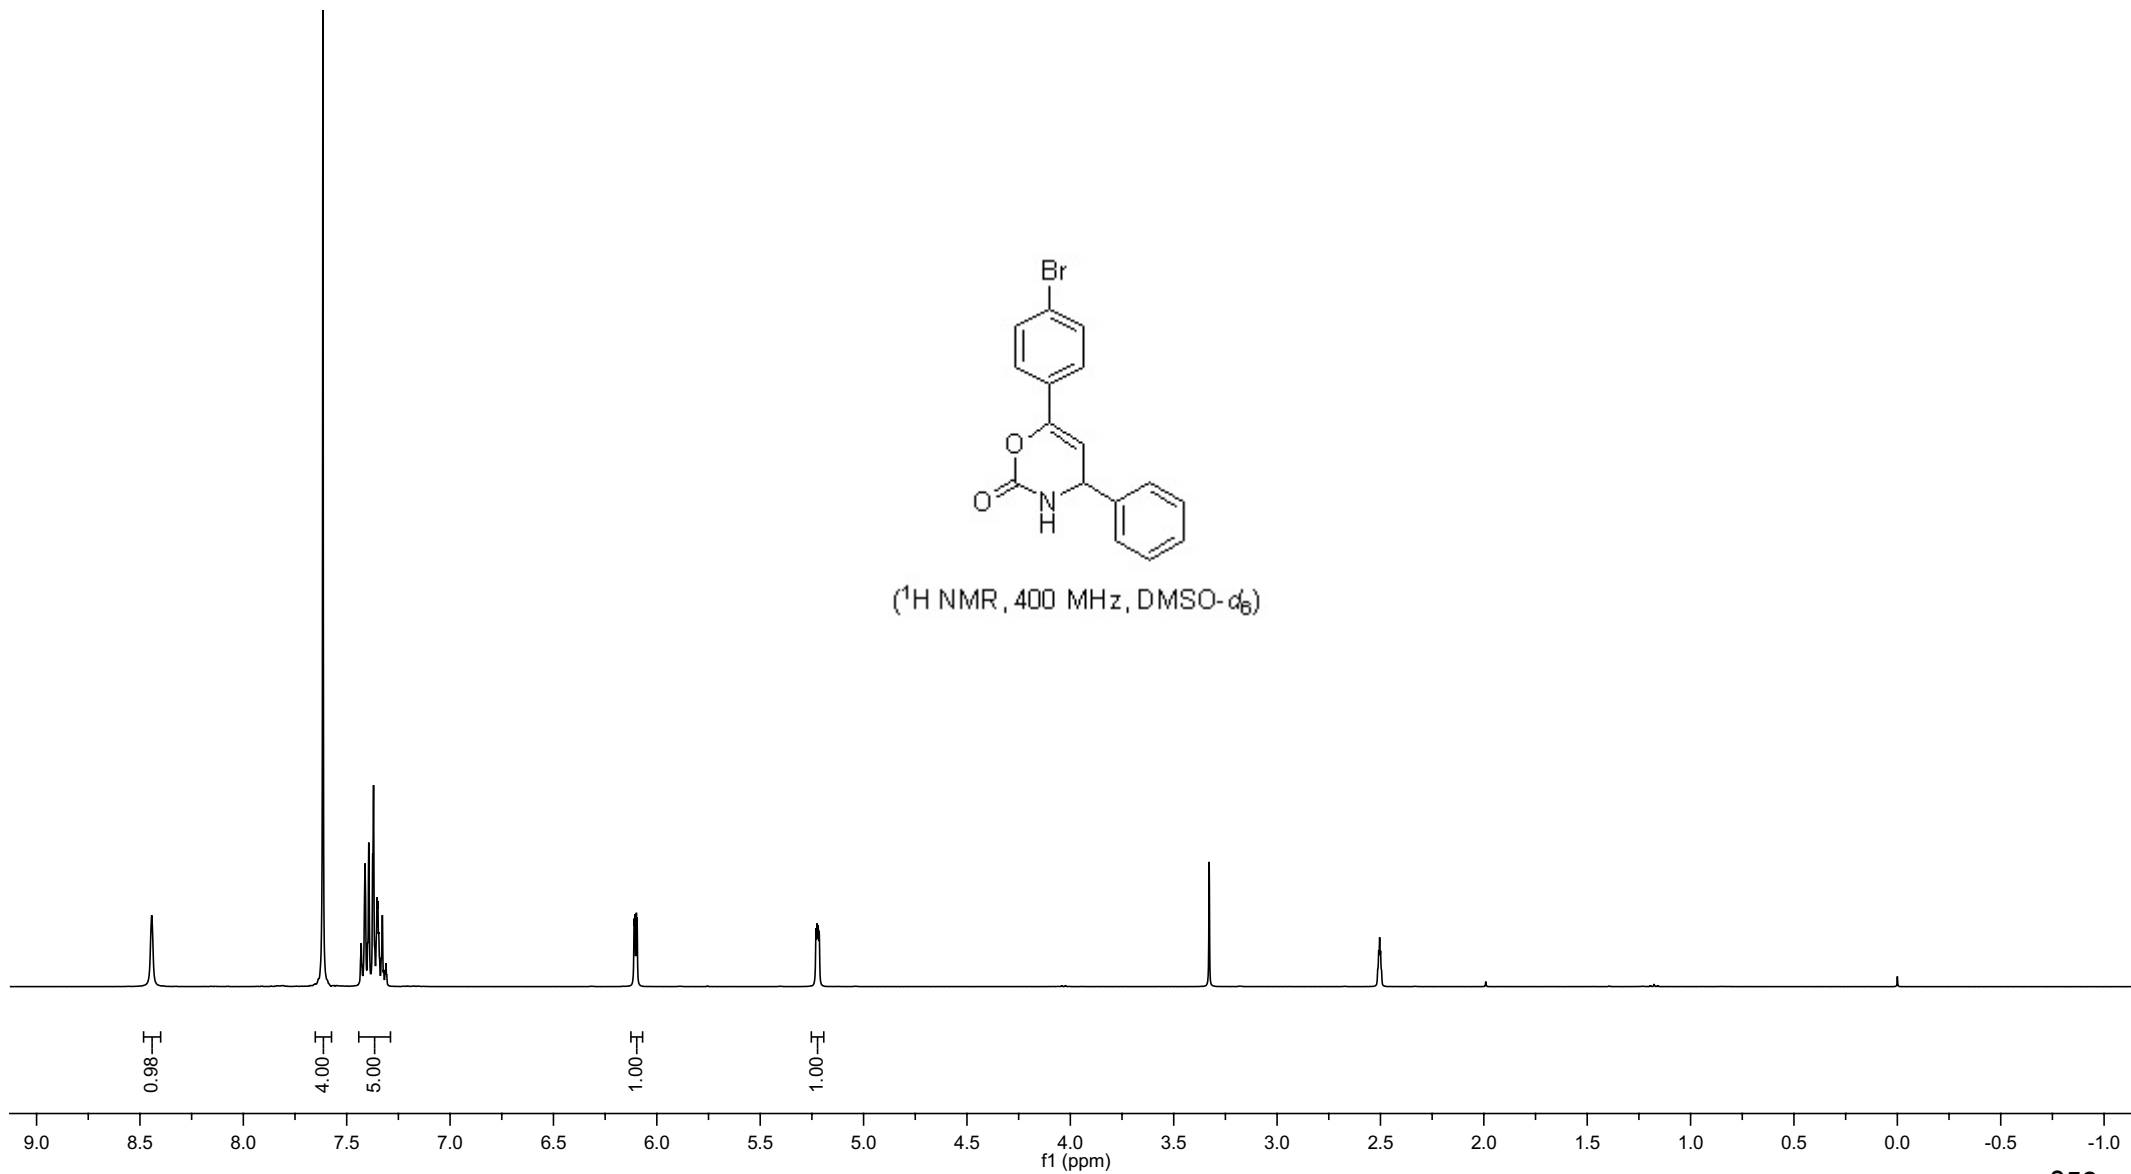

NMR spectra of compound 3ah

148.893  
145.196  
142.439  
131.576  
128.773  
127.887  
126.543  
126.305  
122.375

100.756

54.097

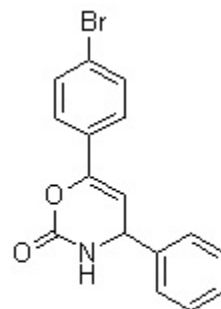

(<sup>13</sup>C NMR, 100 MHz, DMSO-*d*<sub>6</sub>)

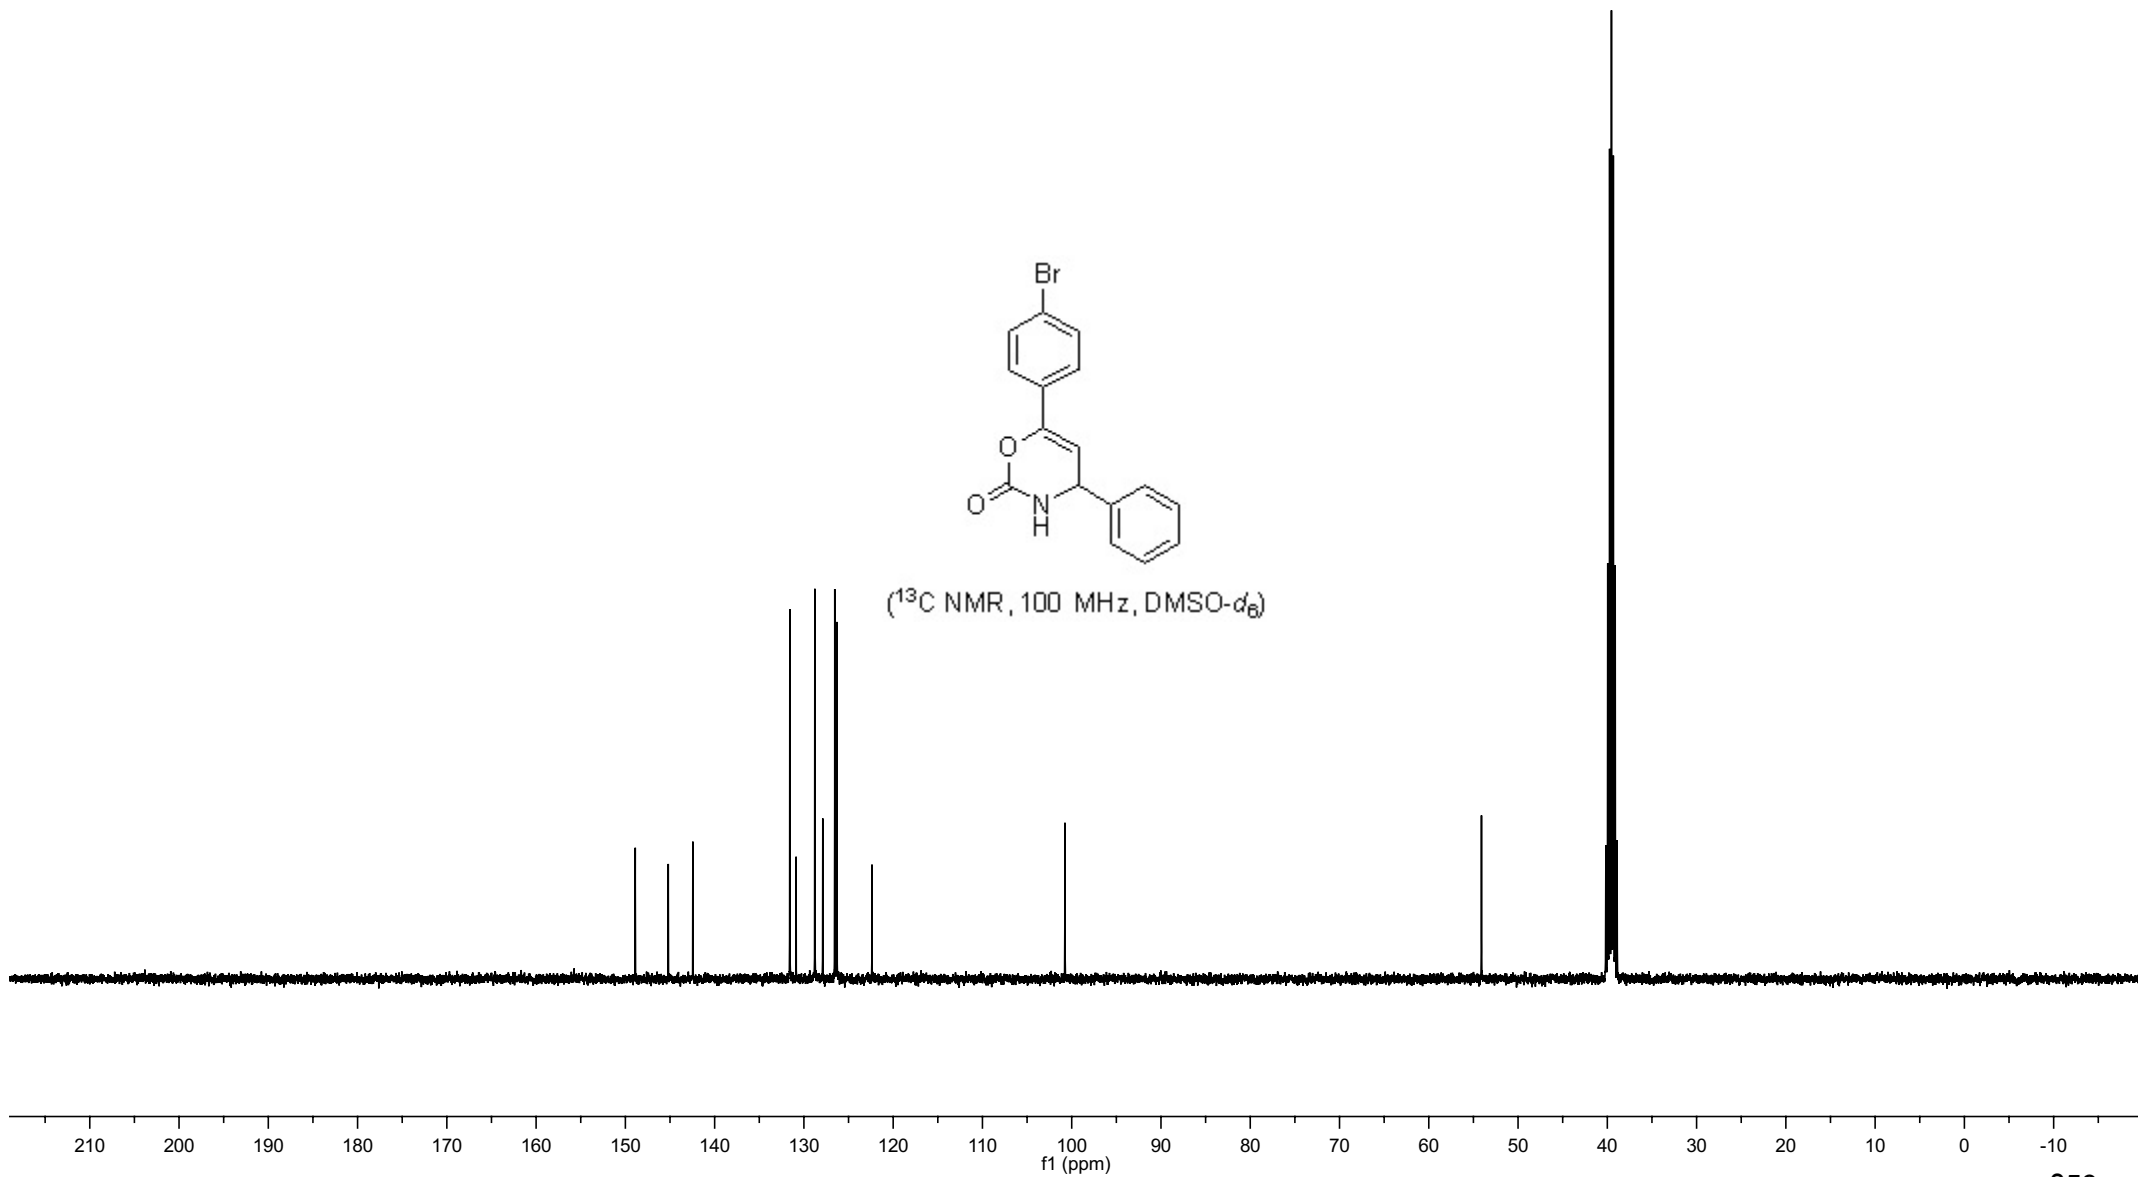

# NMR spectra of compound 3ai

7.800  
7.795  
7.780  
7.776  
7.760  
7.756  
7.387  
7.352  
7.334  
7.301  
7.202  
7.164  
7.074  
7.045  
— 6.402  
5.905  
5.900  
5.895  
5.891  
5.261  
5.258  
5.252  
5.249

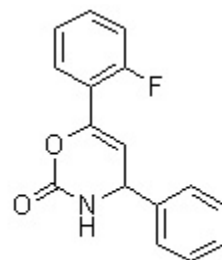

(<sup>1</sup>H NMR, 400 MHz, CDCl<sub>3</sub>)

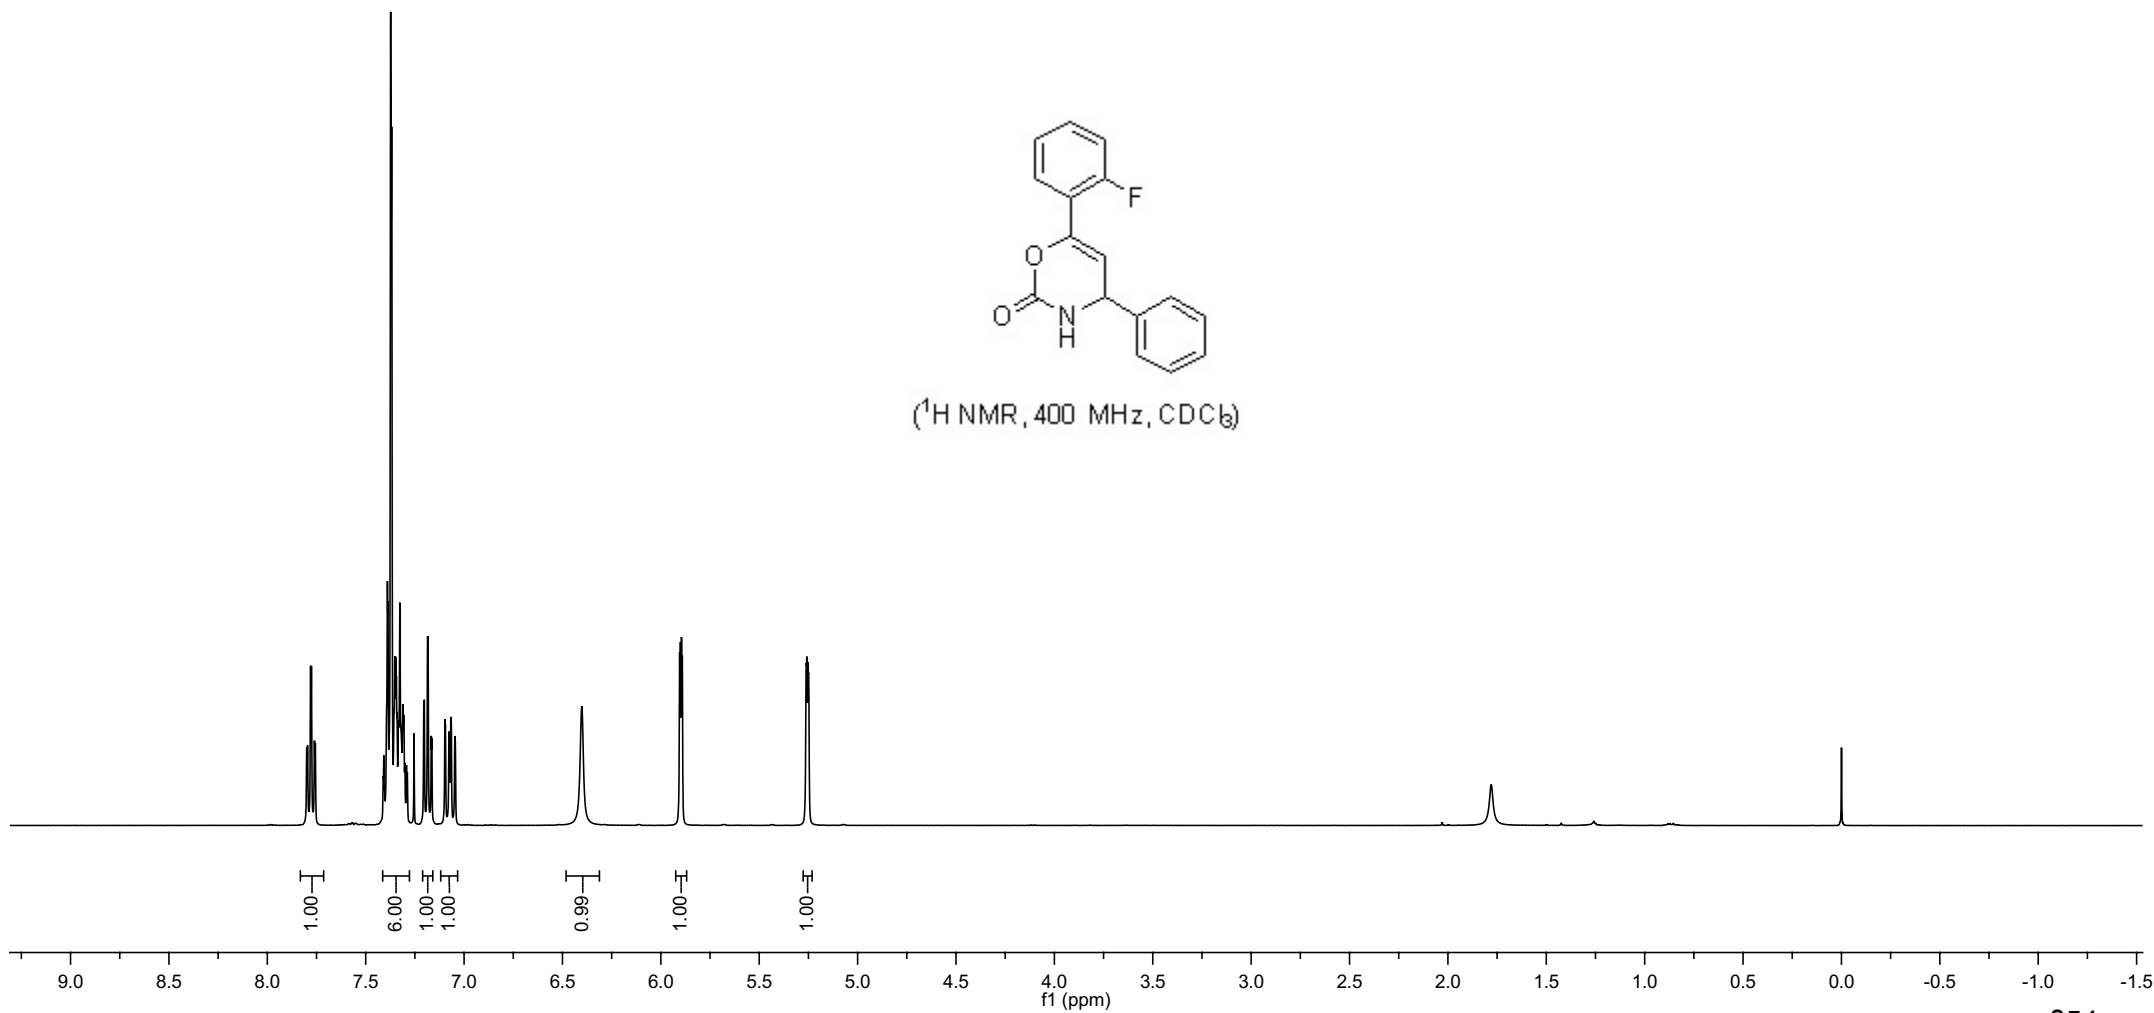

NMR spectra of compound 3ai

— 161.198  
— 158.692  
  
— 150.259  
  
— 142.128  
— 142.081  
— 141.281  
— 129.196  
— 127.893  
— 127.875  
— 126.742  
— 124.242  
  
— 119.608  
— 116.252  
— 116.026  
  
— 104.596  
— 104.449  
  
— 55.800  
— 55.790

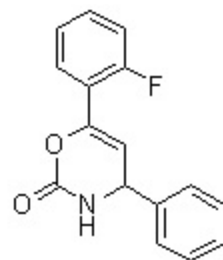

(<sup>13</sup>C NMR, 100 MHz, CDCl<sub>3</sub>)

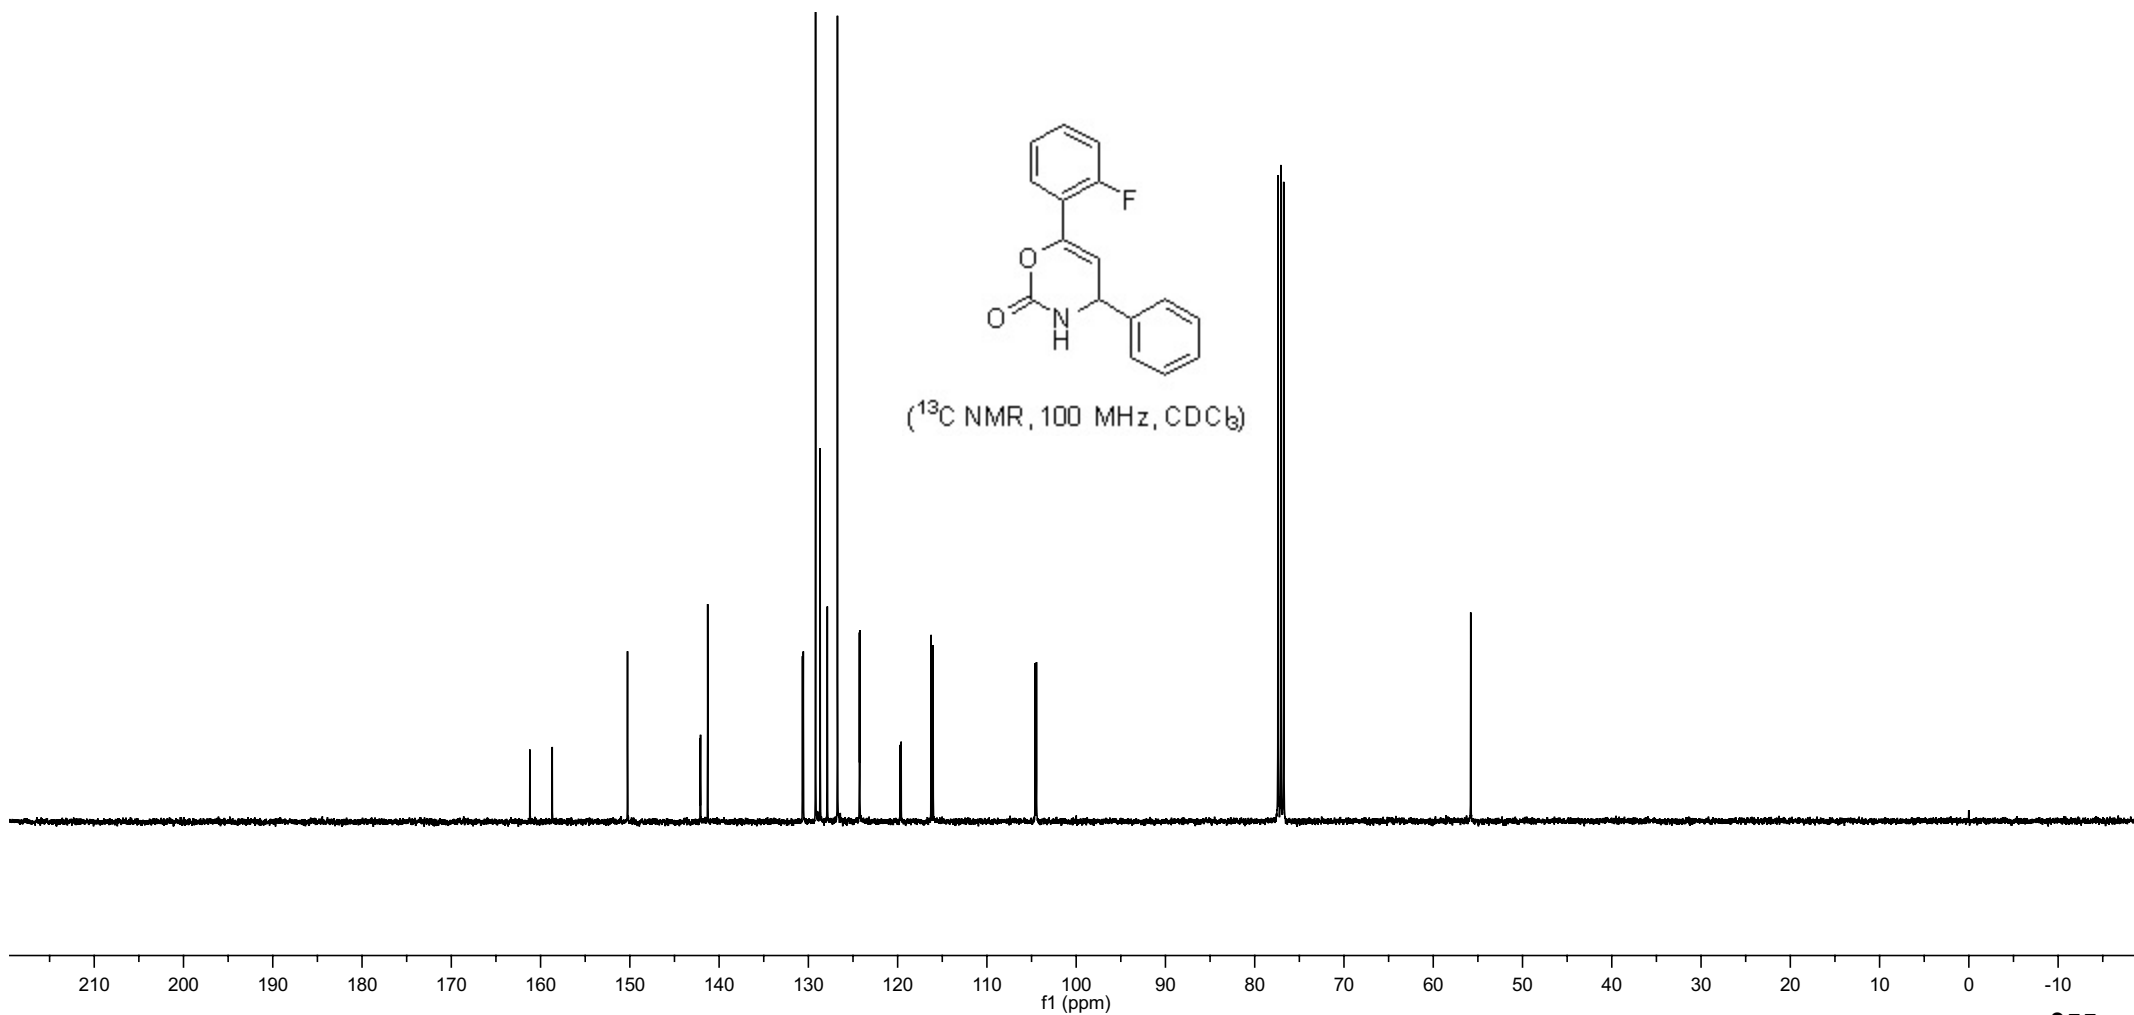

NMR spectra of compound 3ai

-112.325

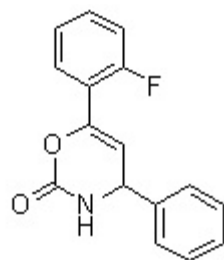

(<sup>19</sup>F NMR, 376 MHz, CDCl<sub>3</sub>)

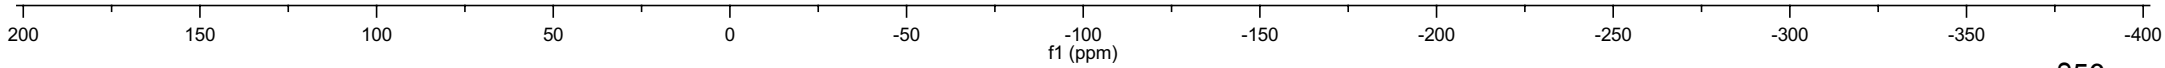



NMR spectra of compound 3aj

7.594  
7.409  
7.402  
7.395  
7.380  
7.374  
7.366  
7.359  
7.352  
7.346  
7.337  
7.329  
7.321  
7.318  
7.302  
7.299  
7.295  
7.255  
7.244  
7.240  
7.224  
7.220  
7.205  
7.201

6.281

5.464  
5.459  
5.455  
5.450

5.248  
5.244  
5.239  
5.236

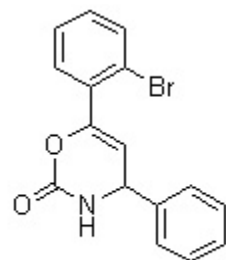

(<sup>1</sup>H NMR, 400 MHz, CDCl<sub>3</sub>)

1.00  
1.00  
6.00  
1.00

1.00

1.00

1.00

9.0 8.5 8.0 7.5 7.0 6.5 6.0 5.5 5.0 4.5 4.0 3.5 3.0 2.5 2.0 1.5 1.0 0.5 0.0 -0.5 -1.0

f1 (ppm)

NMR spectra of compound 3aj

- 150.127
- 147.410
- 141.153
- 133.641
- 133.465
- 129.185
- 126.903
- 122.263
- 104.396
- 55.915

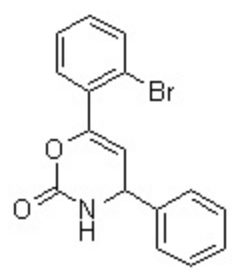

(<sup>13</sup>C NMR, 100 MHz, CDCl<sub>3</sub>)

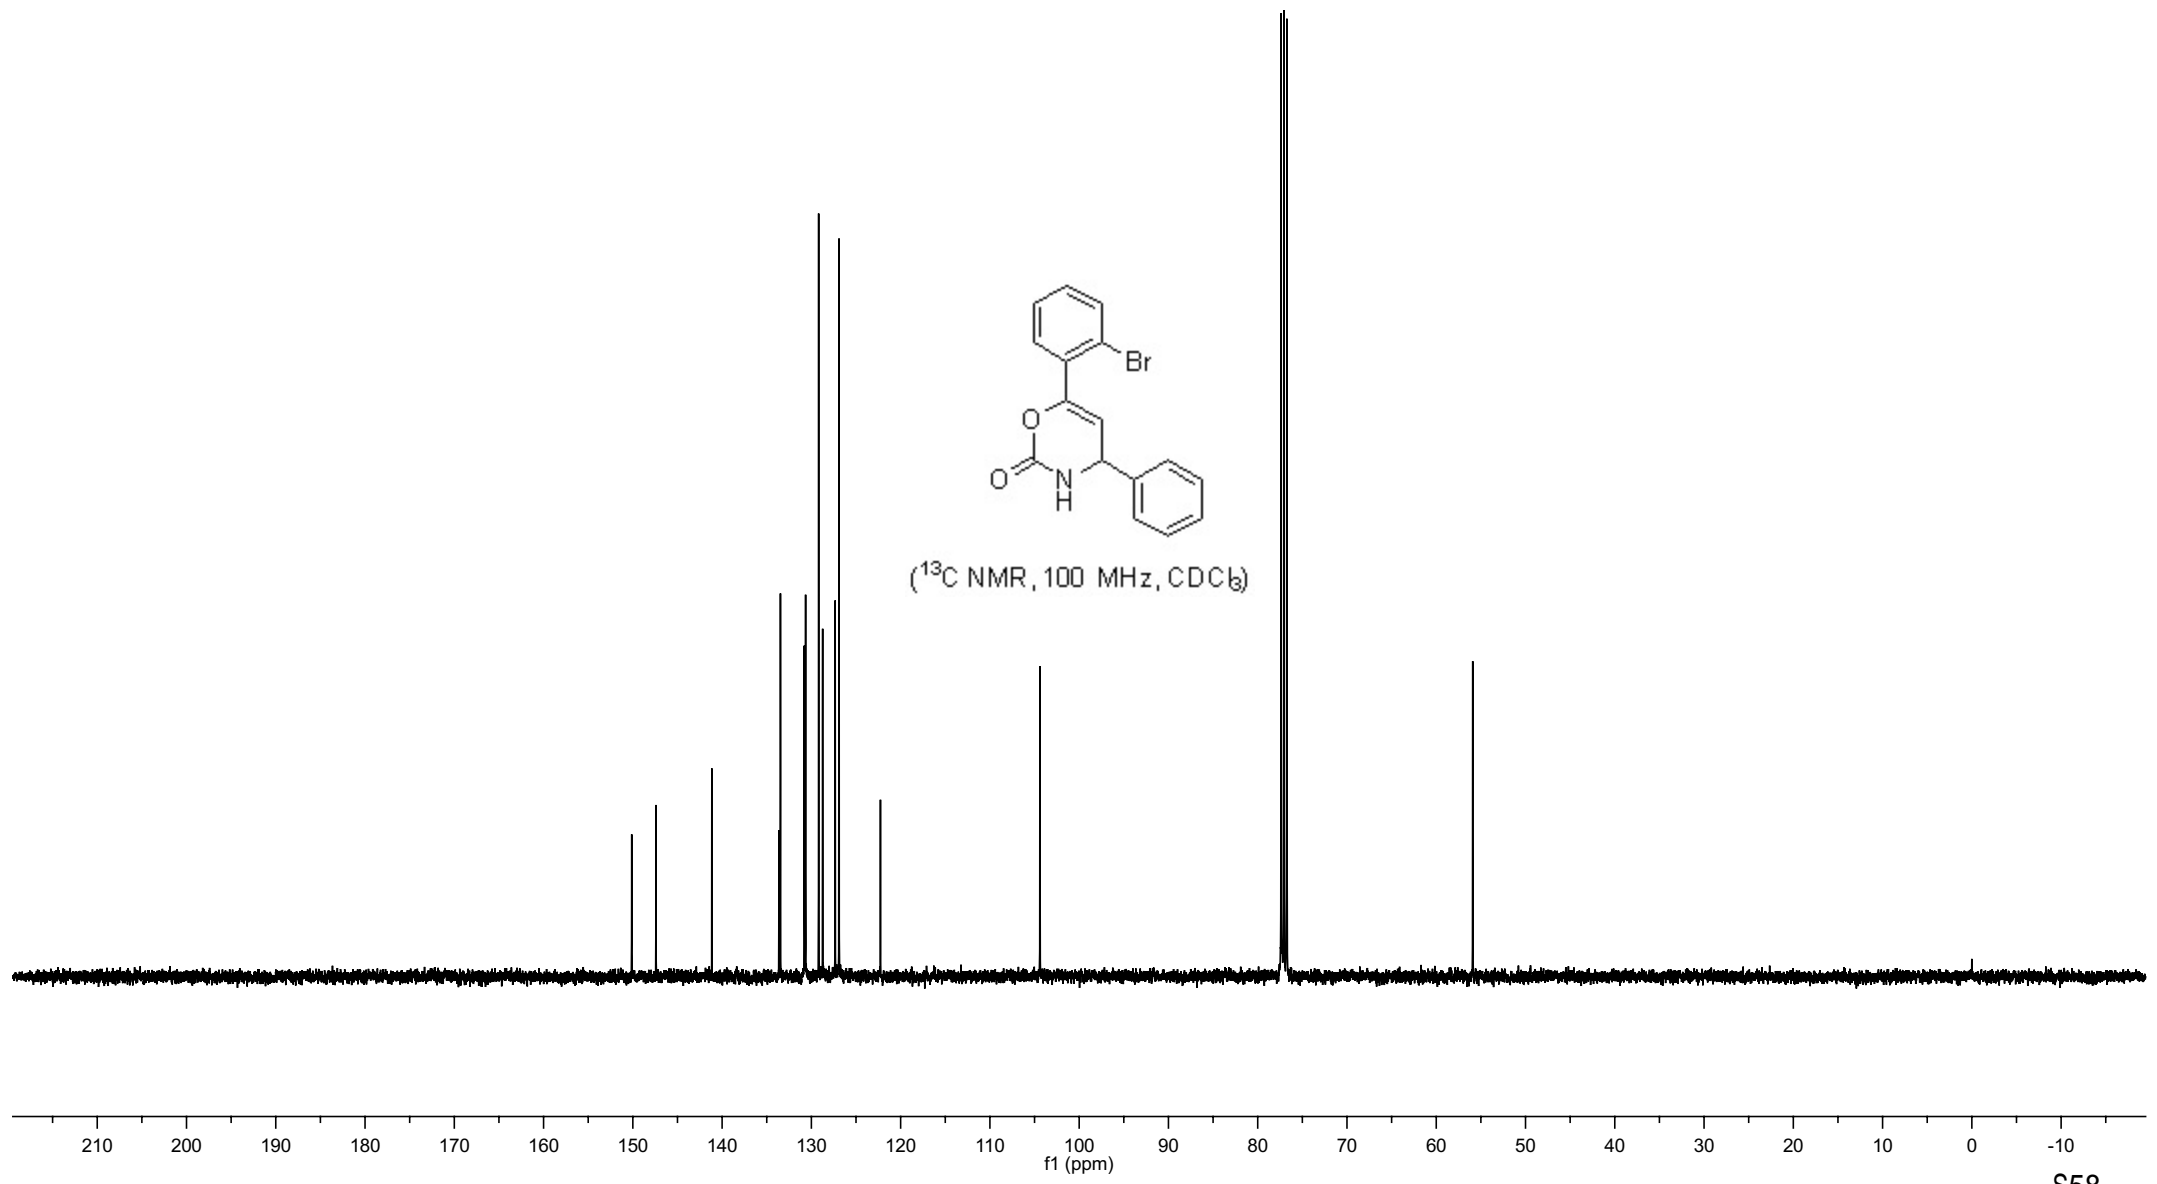

NMR spectra of compound 3ak

8.379  
7.372  
7.342  
7.339  
7.327  
7.321  
7.315  
7.308  
7.304  
7.296  
7.277  
7.205  
7.186

5.978  
5.974  
5.967  
5.964

5.220  
5.215  
5.210  
5.205

2.322

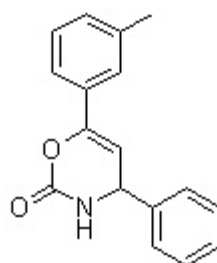

(<sup>1</sup>H NMR, 400 MHz, DMSO-*d*<sub>6</sub>)

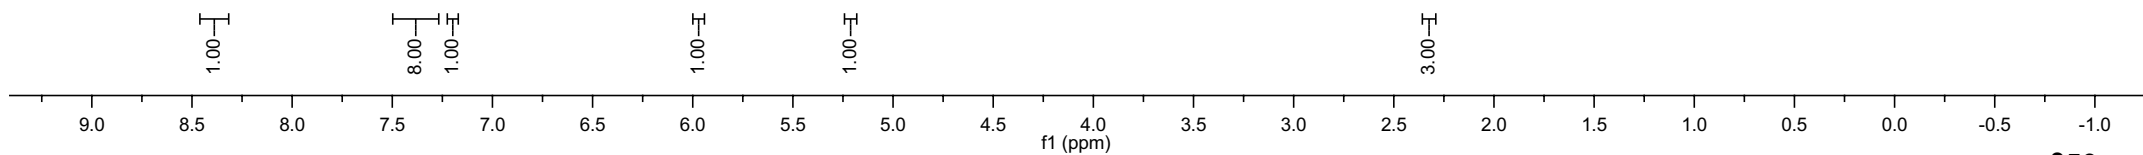

# NMR spectra of compound 3ak

—149.195  
—146.268  
—142.731  
—137.851  
—128.745  
—128.480  
—127.814  
—126.491  
—124.758  
—121.439

—99.864

—54.103

—20.915

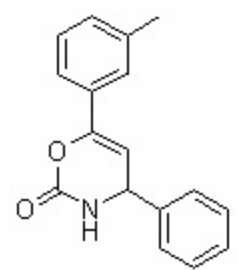

(<sup>13</sup>C NMR, 100 MHz, DMSO-d<sub>6</sub>)

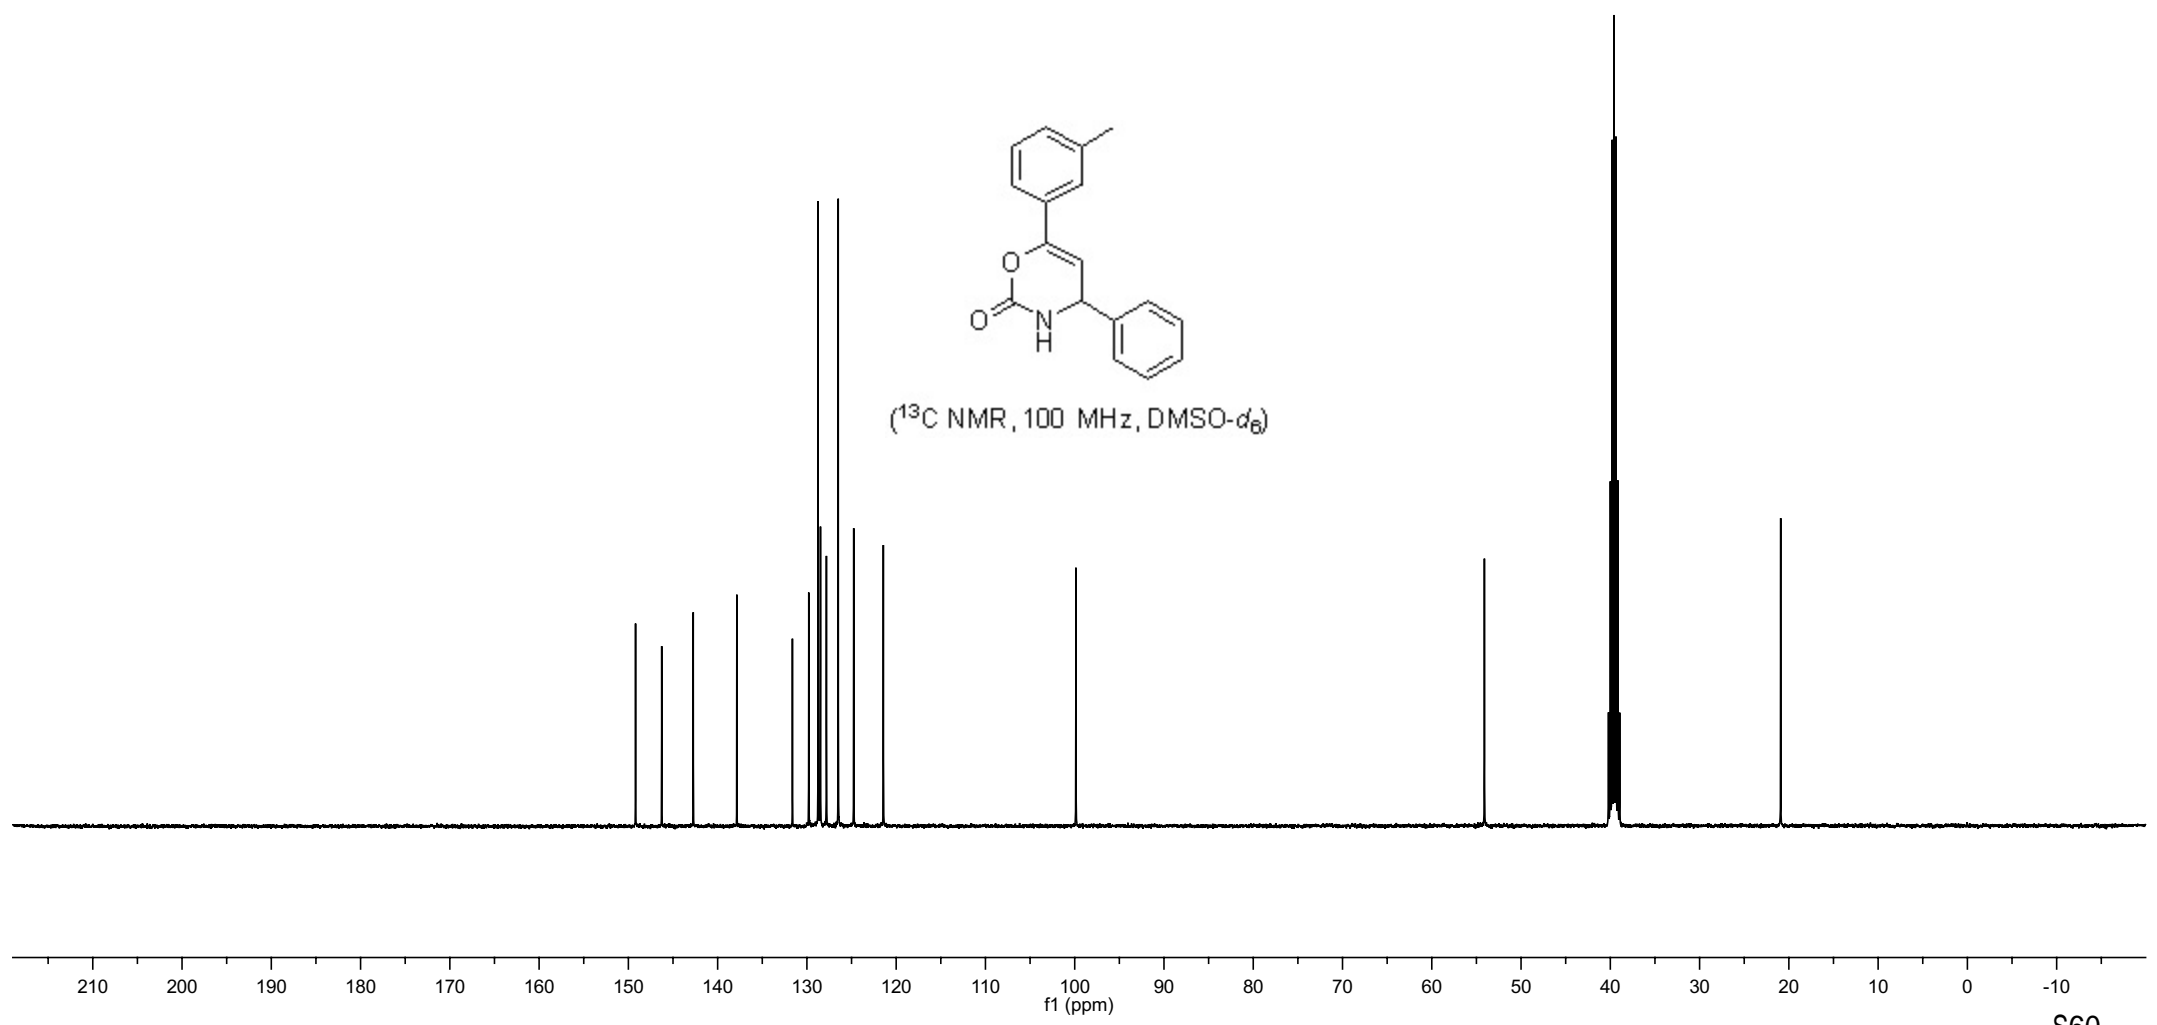

# NMR spectra of compound 3aI

8.392

7.417  
7.411  
7.400  
7.396  
7.351  
7.345  
7.338  
7.325  
7.311  
7.293  
7.260  
7.241  
7.222  
7.204

5.426  
5.419  
5.416

5.205  
5.199  
5.195  
5.190

2.354

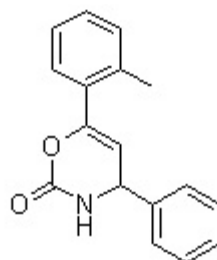

(<sup>1</sup>H NMR, 400 MHz, DMSO-*d*<sub>6</sub>)

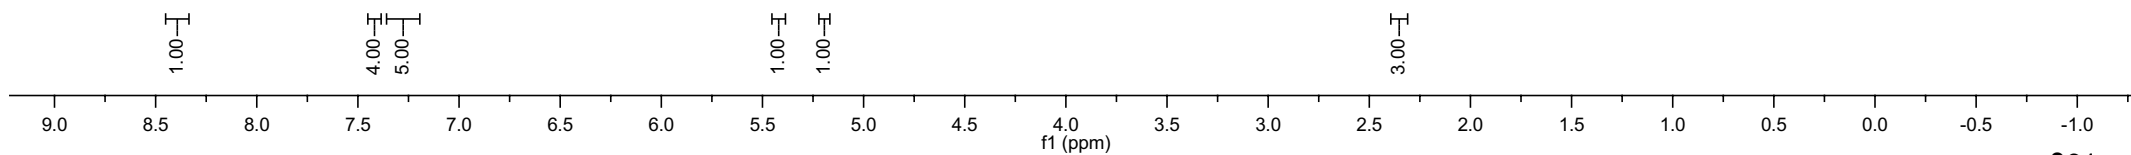

NMR spectra of compound 3al

149.278  
147.936  
142.822  
135.877  
132.665  
130.534  
129.255  
128.774  
128.607  
127.844  
126.516  
125.859

103.680

54.265

19.828

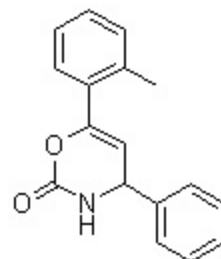

(<sup>13</sup>C NMR, 100 MHz, DMSO-*d*<sub>6</sub>)

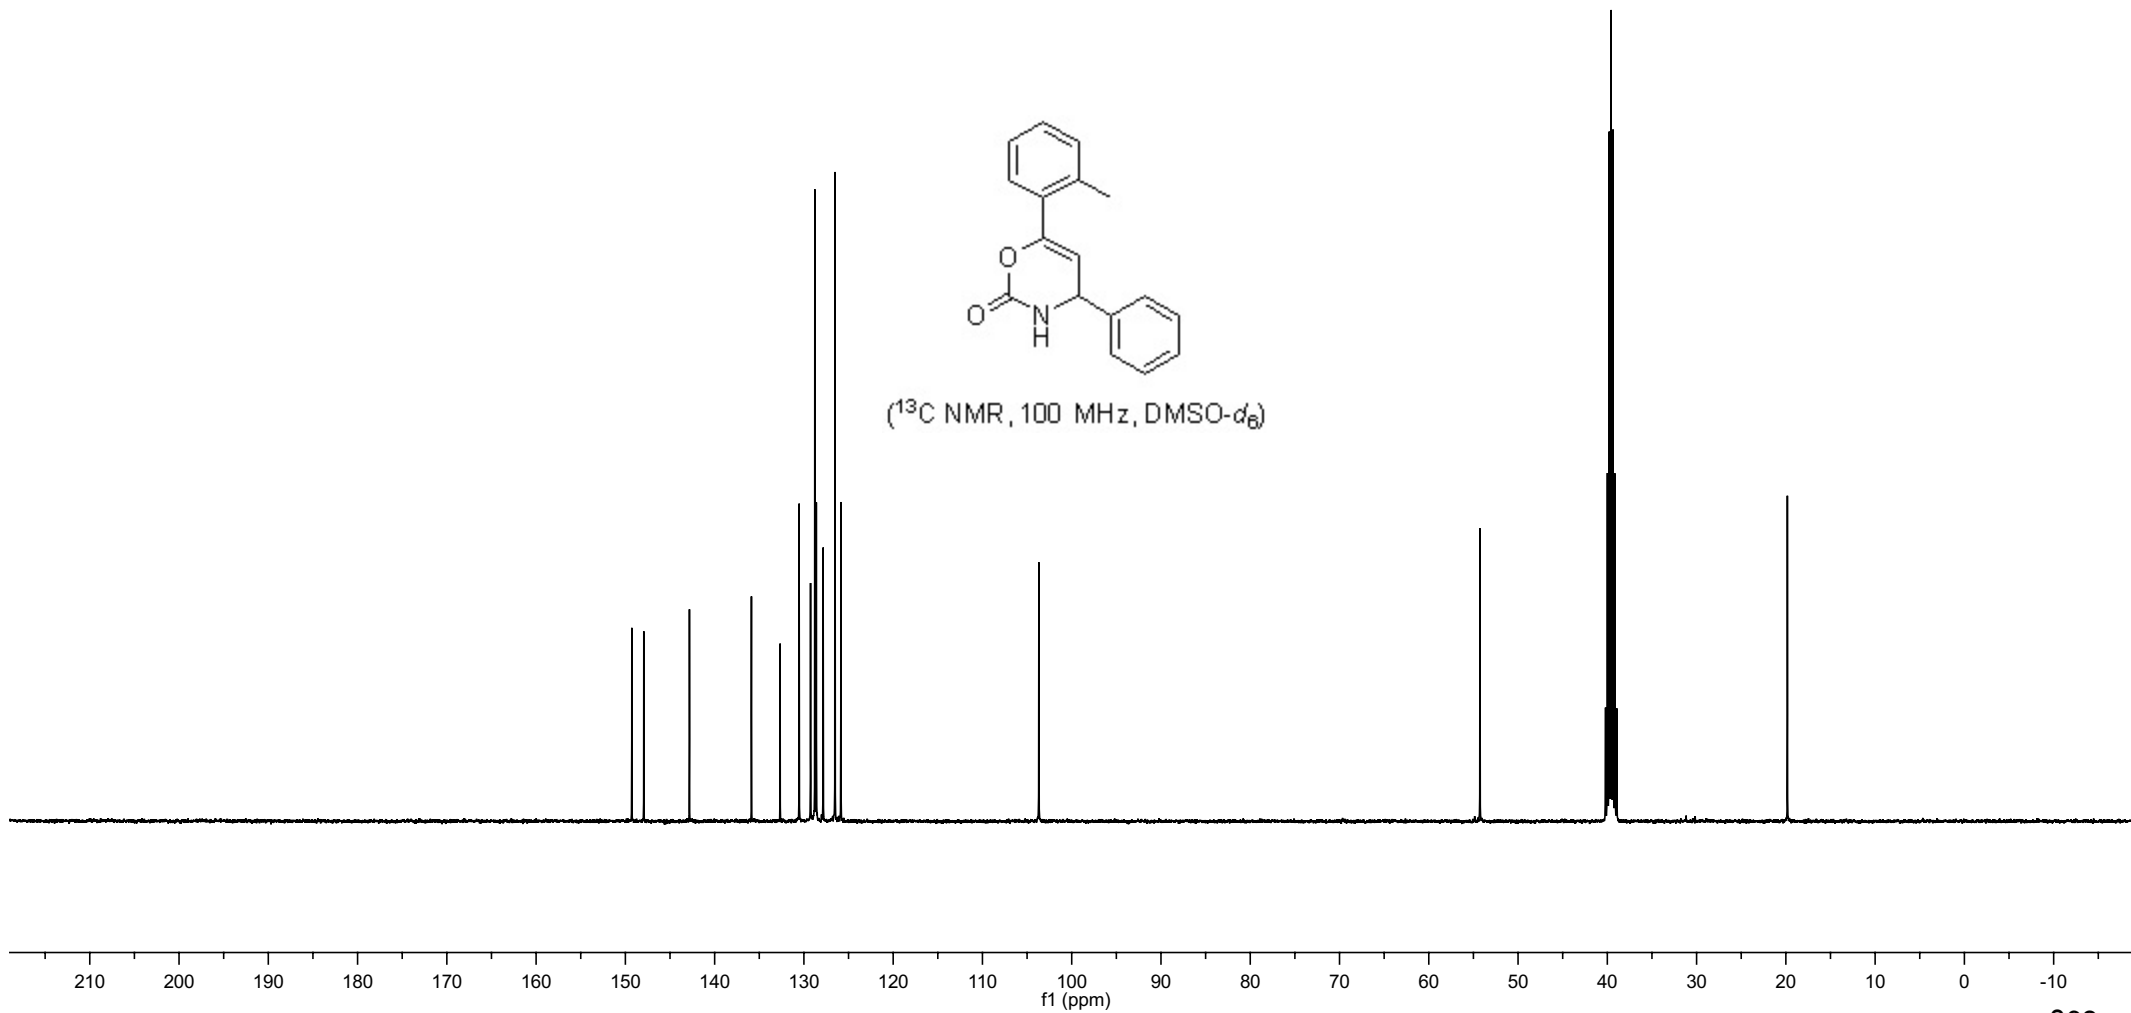

NMR spectra of compound 3am

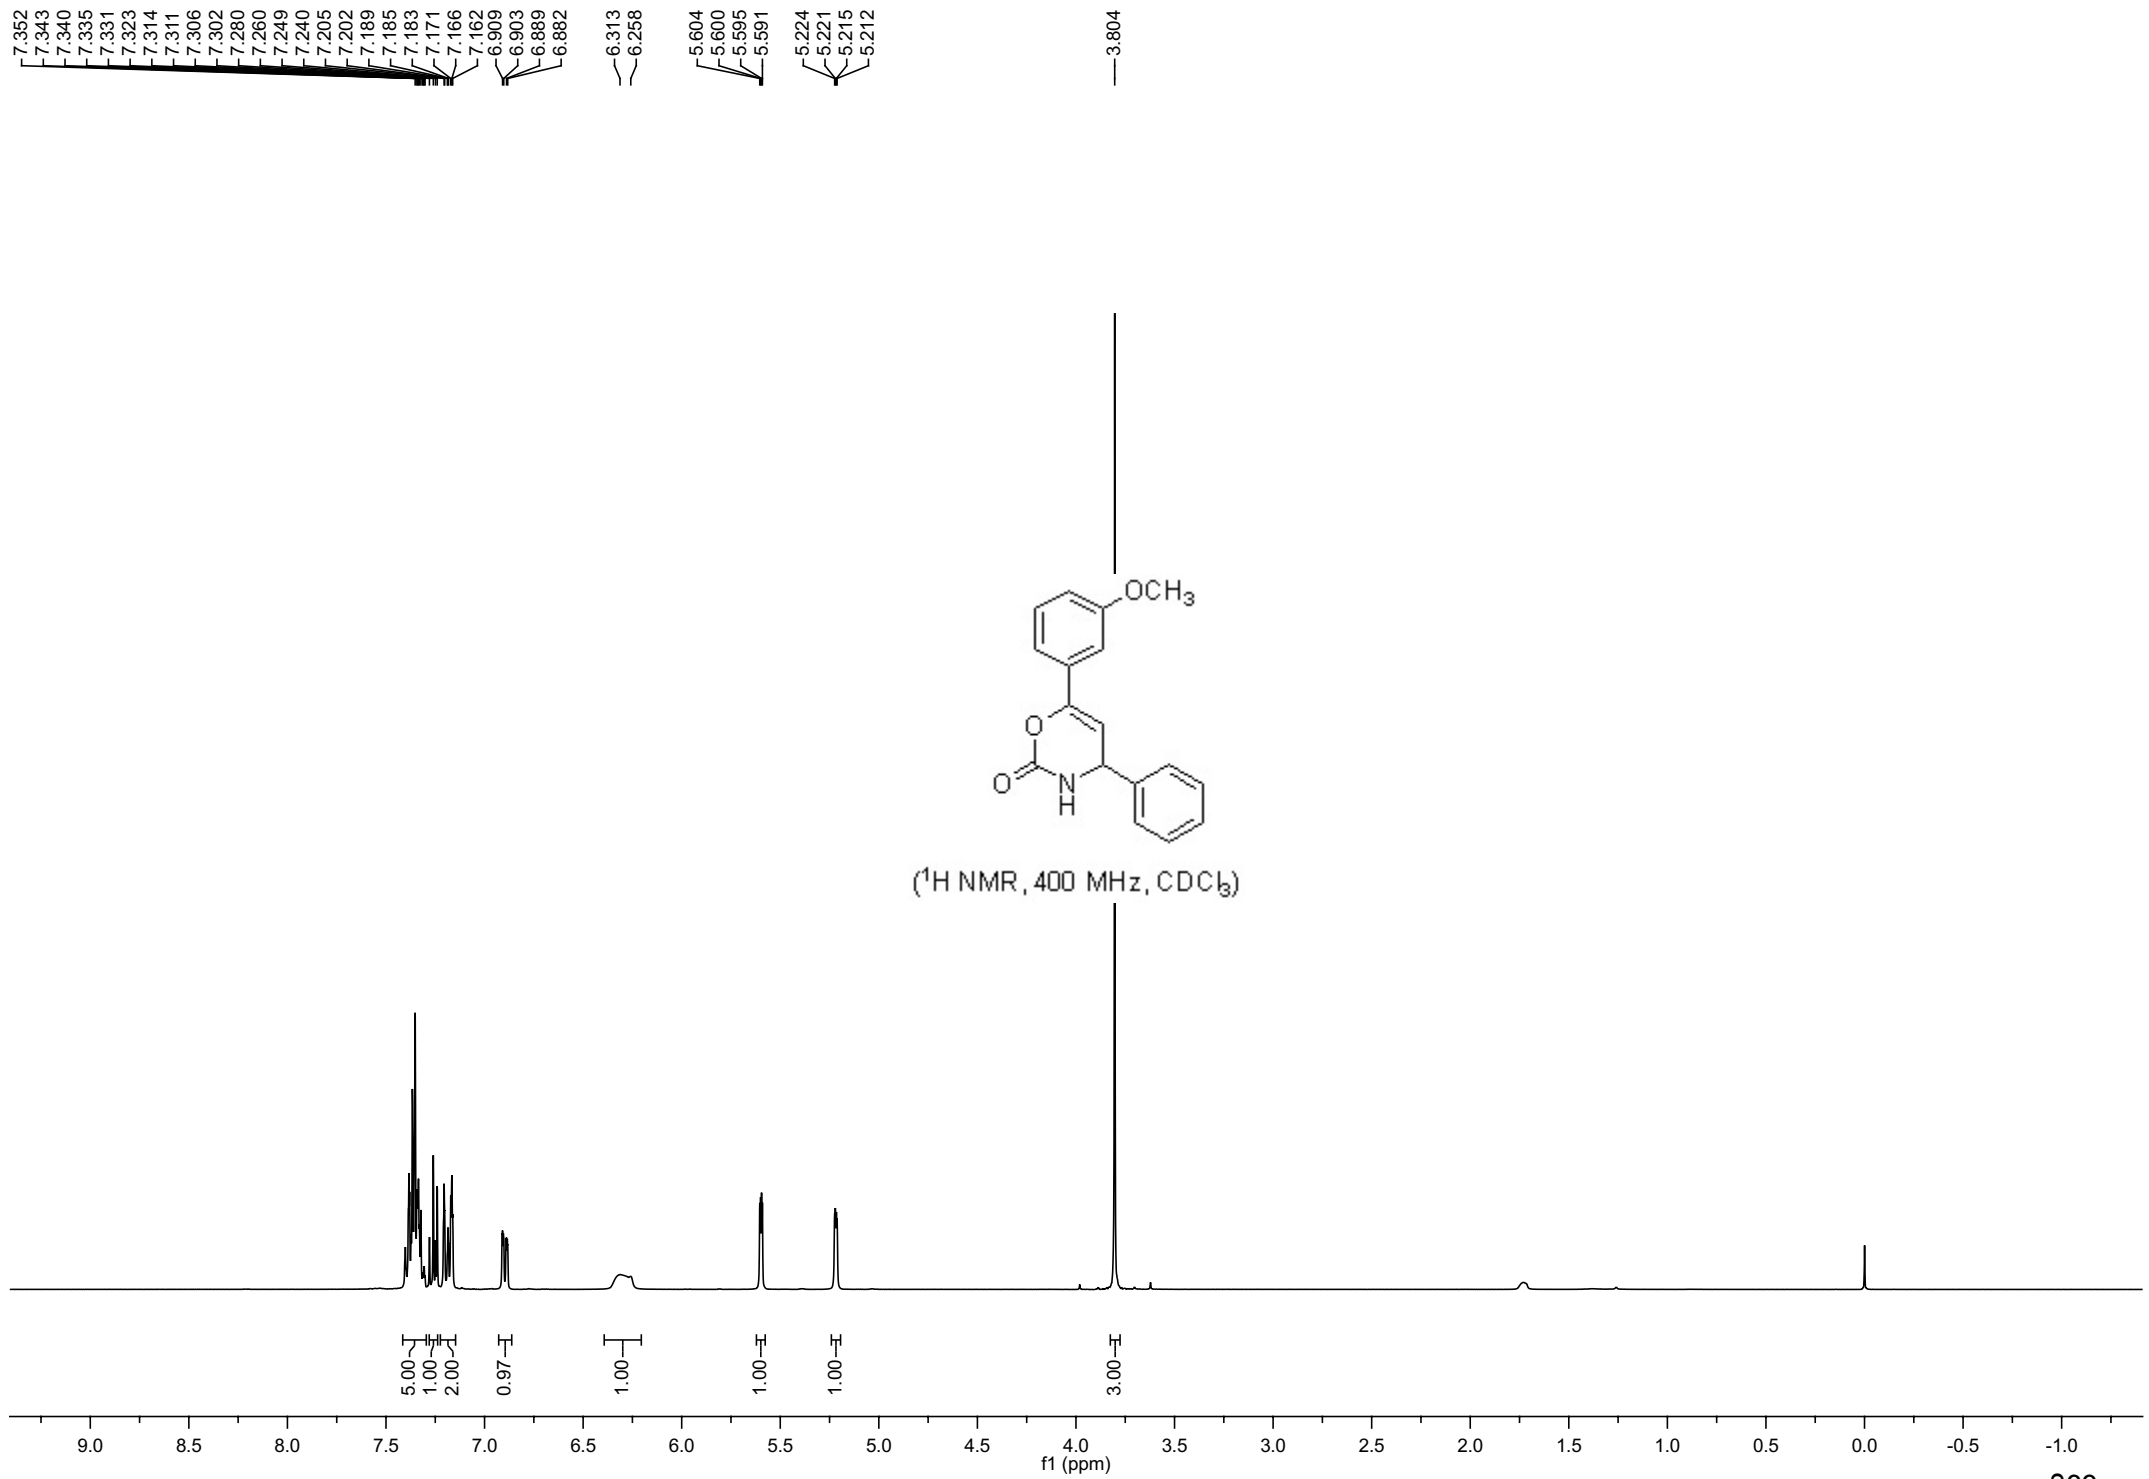

NMR spectra of compound 3am

159.836  
150.341  
147.475  
141.495  
132.998  
129.541  
129.198  
128.660  
126.709  
117.282  
115.546  
110.108  
99.151  
55.756  
55.415

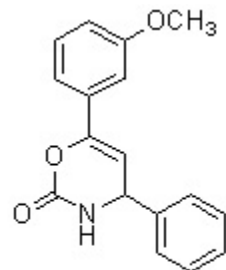

(<sup>13</sup>C NMR, 100 MHz, CDCl<sub>3</sub>)

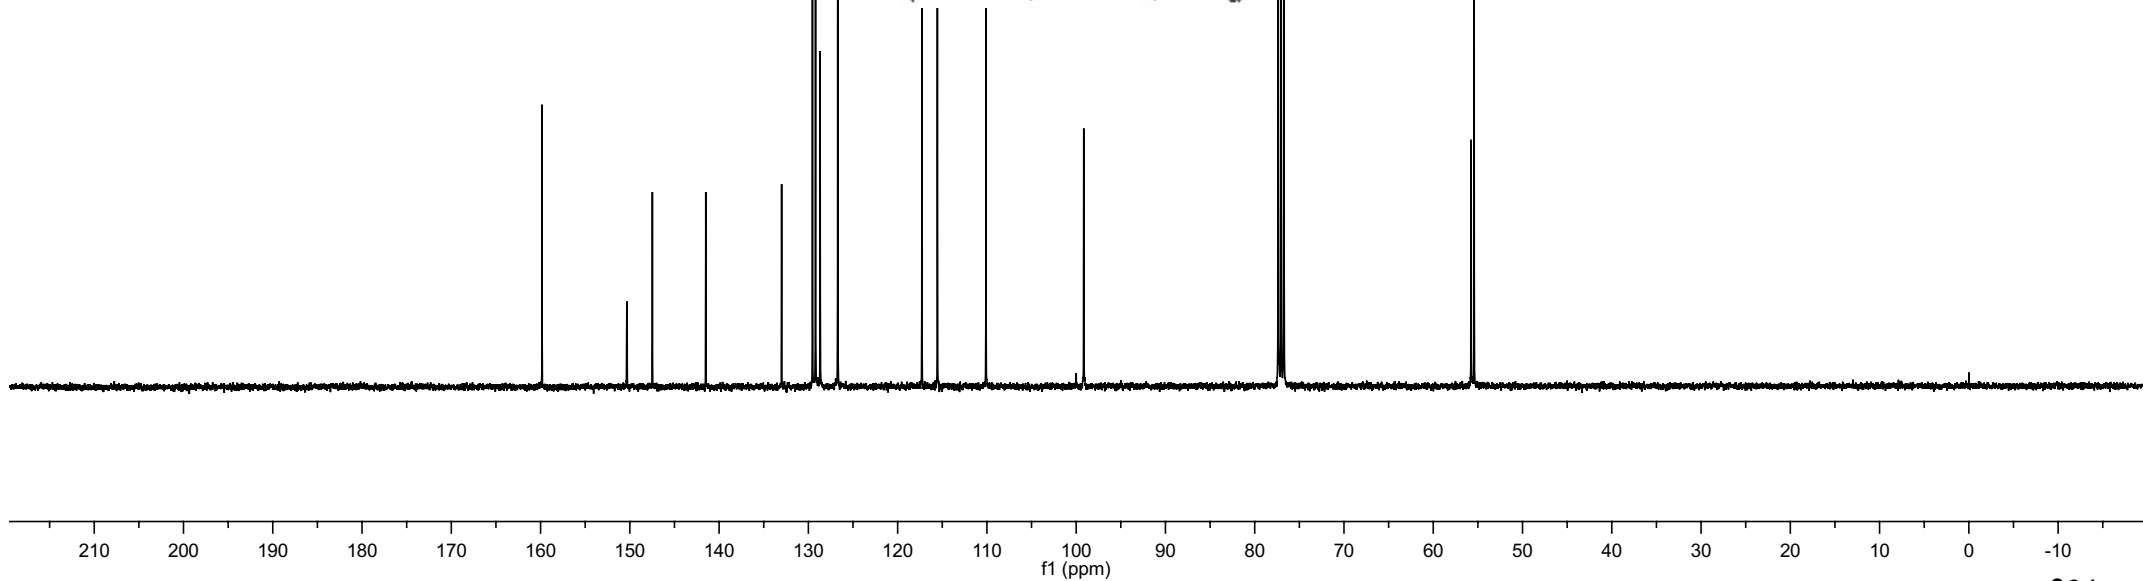



NMR spectra of compound 3an

8.450

7.688

7.666

7.512

7.414

7.396

7.374

7.351

7.335

7.312

6.132

6.129

6.122

6.118

5.250

5.245

5.240

5.235

4.302

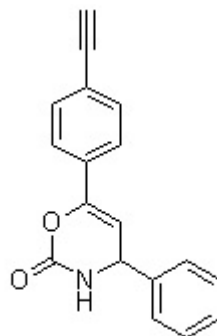

(<sup>1</sup>H NMR, 400 MHz, DMSO-*d*<sub>6</sub>)

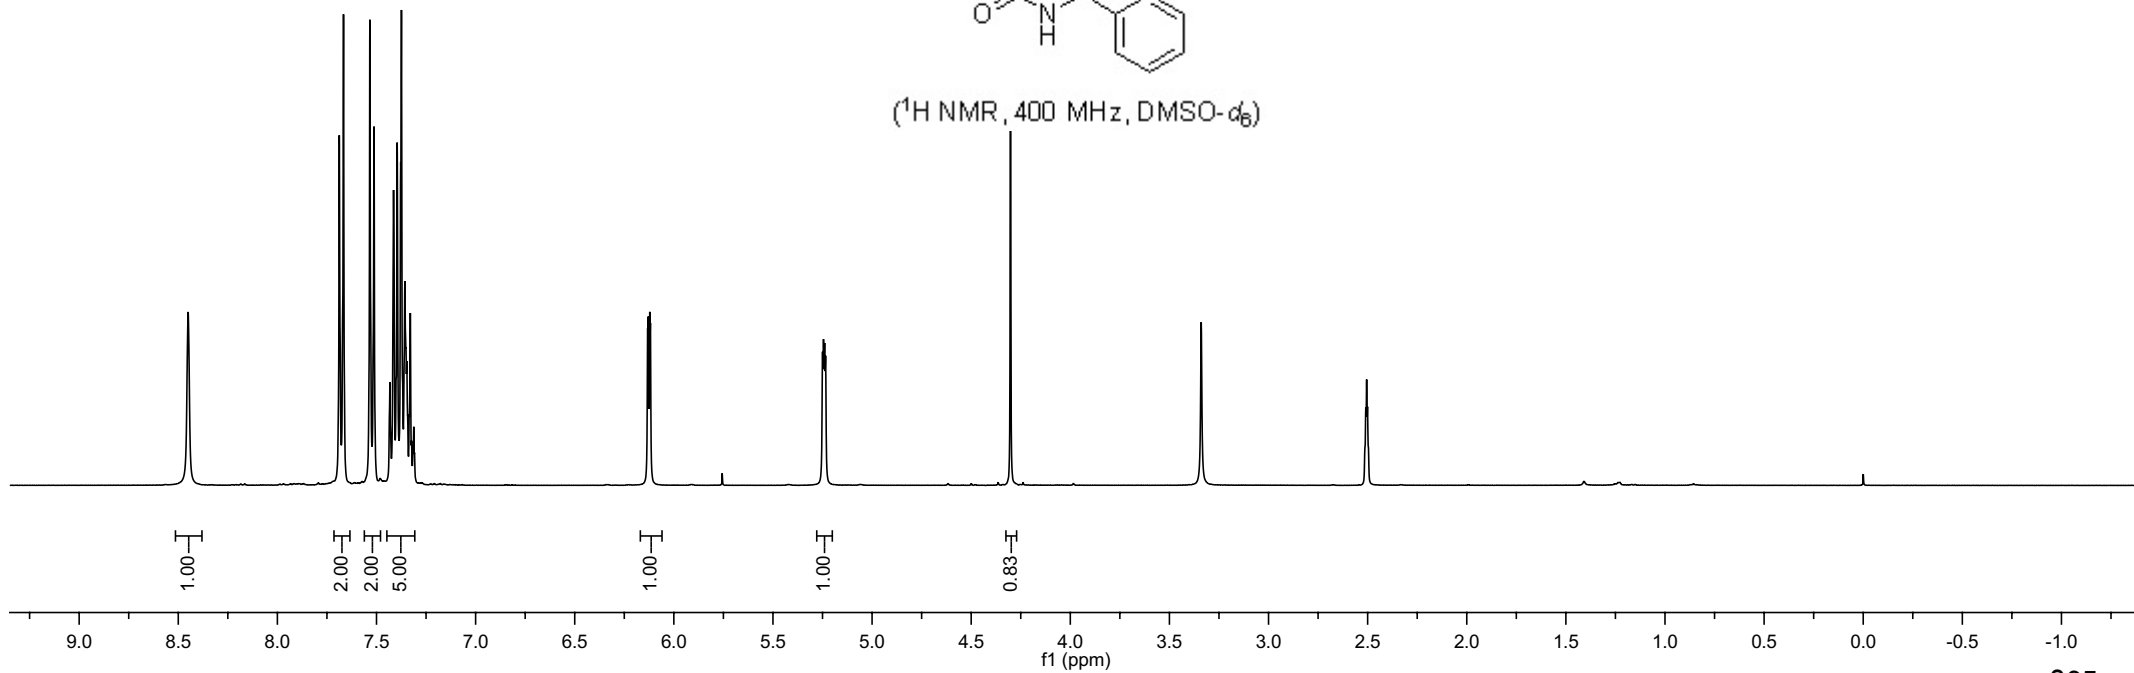

NMR spectra of compound **3an**

— 148.937  
— 145.383  
— 142.455  
— 131.958  
— 131.895  
— 128.780  
— 127.894  
— 126.548  
— 124.429  
— 122.286  
— 101.247  
— 83.047  
— 82.137  
— 54.130

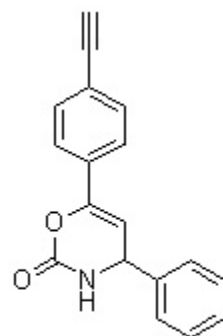

(<sup>13</sup>C NMR, 100 MHz, DMSO-*d*<sub>6</sub>)

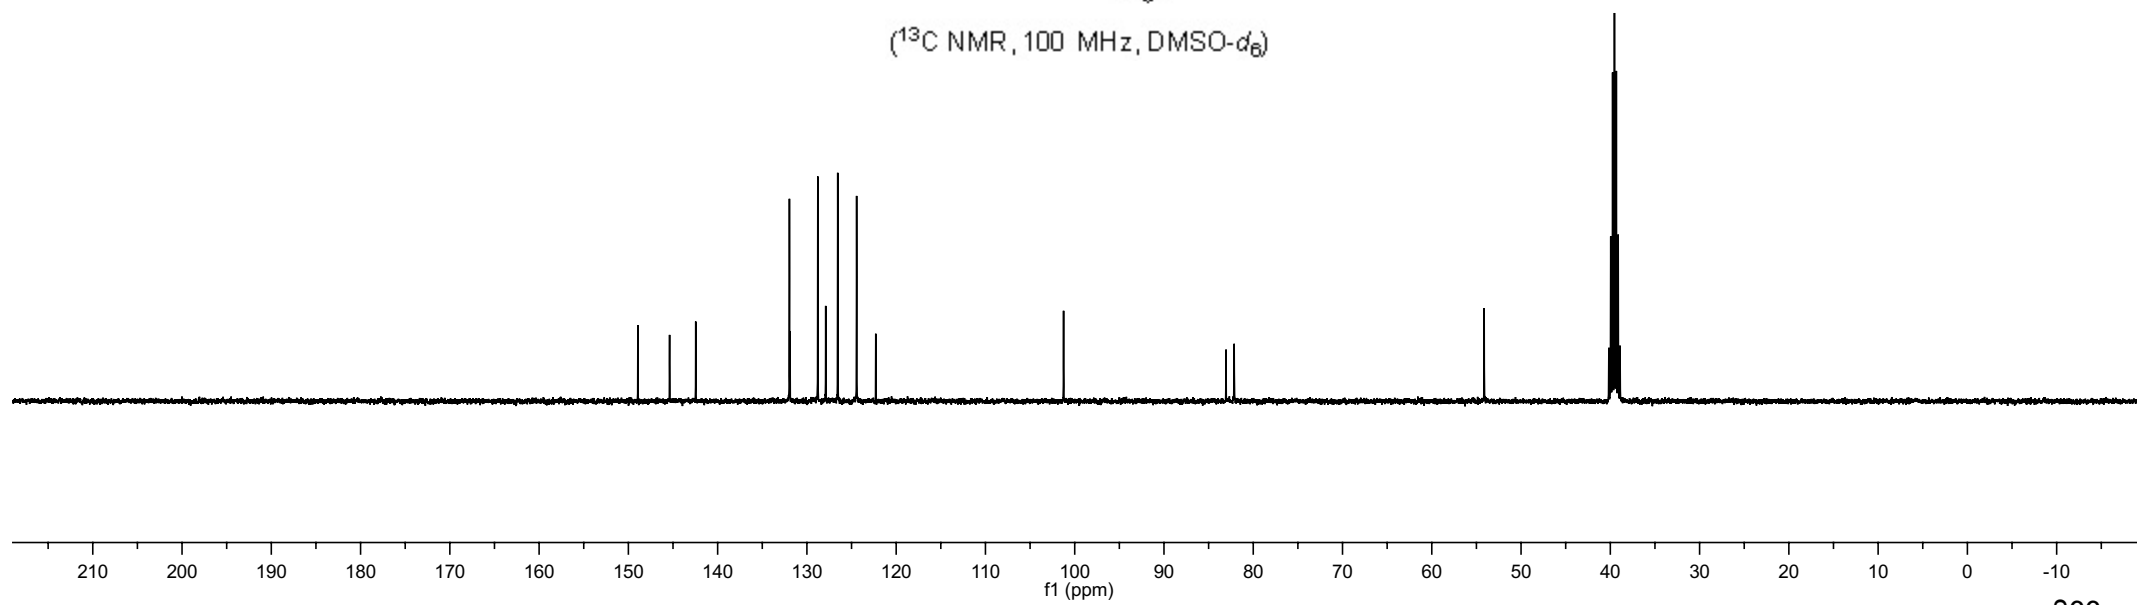

NMR spectra of compound 3ao

8.362  
 7.719  
 7.717  
 7.712  
 7.709  
 7.575  
 7.405  
 7.363  
 7.359  
 7.341  
 7.325  
 7.320  
 7.302  
 5.892  
 5.889  
 5.882  
 5.879  
 5.206  
 5.201  
 5.196  
 5.191

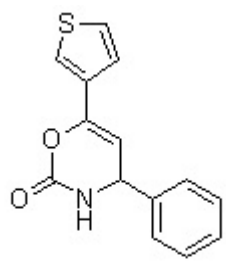

(<sup>1</sup>H NMR, 400 MHz, DMSO-*d*<sub>6</sub>)

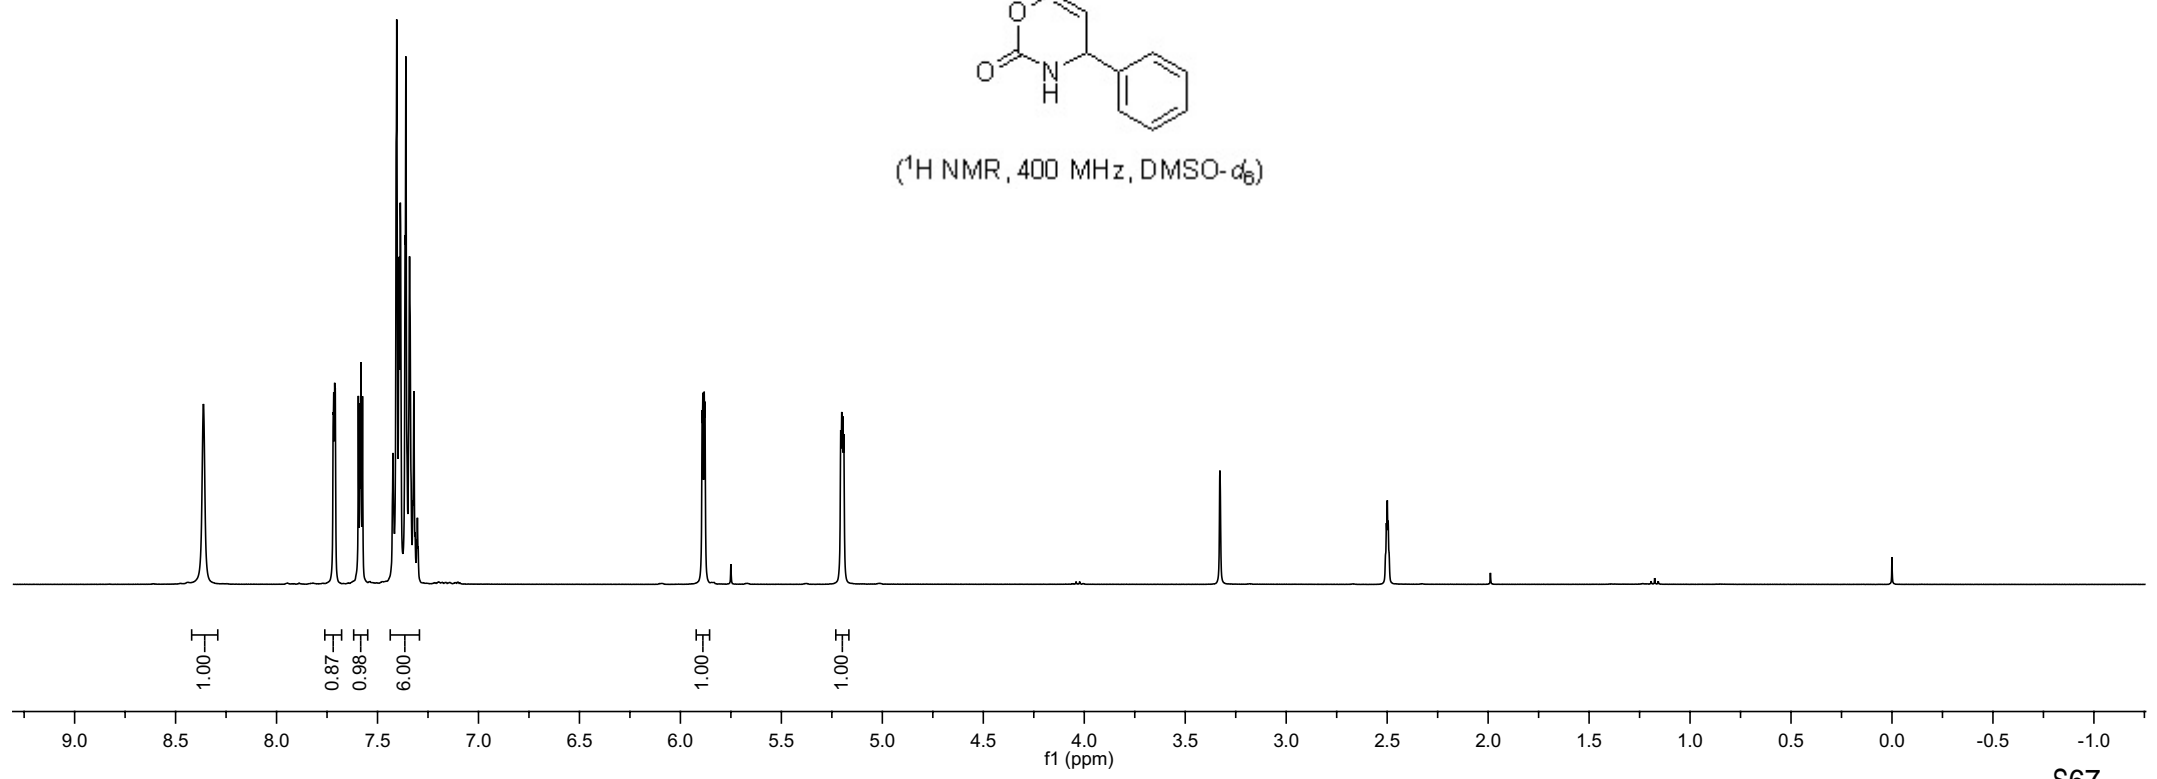

NMR spectra of compound **3ao**

— 149.025  
— 143.426  
— 142.749  
— 133.875  
— 128.751  
— 127.843  
— 127.424  
— 126.539  
— 124.553  
— 122.399  
— 99.440  
— 54.013

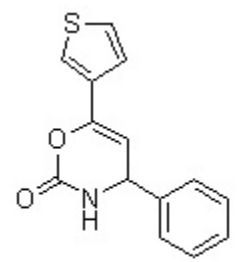

(<sup>13</sup>C NMR, 100 MHz, DMSO-*d*<sub>6</sub>)

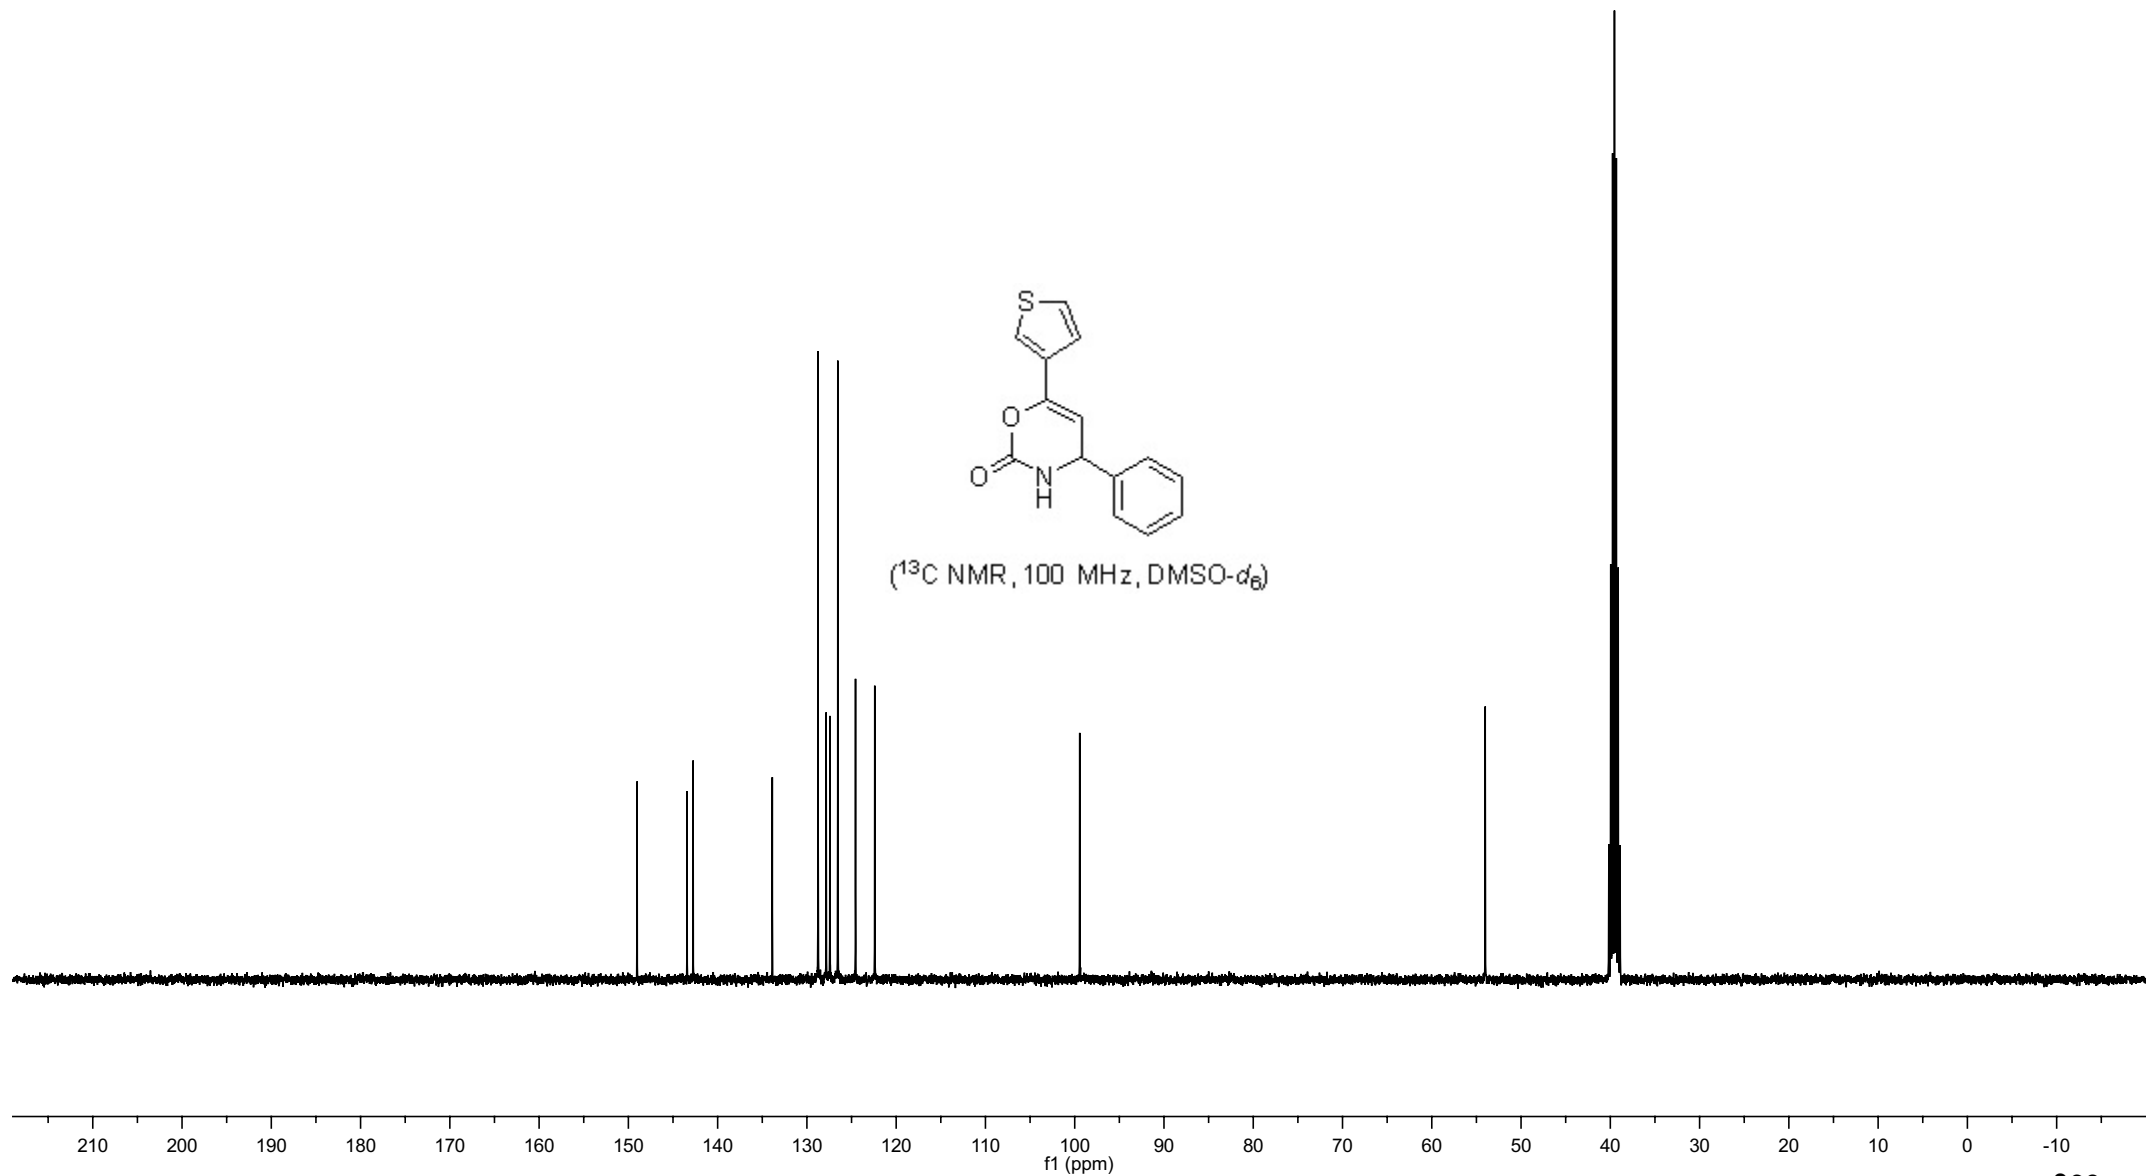

NMR spectra of compound 3ap

8.463

7.606  
7.595

7.394  
7.310

7.116  
7.106  
7.104  
7.094

5.852  
5.850  
5.842  
5.840

5.218  
5.213  
5.208  
5.204

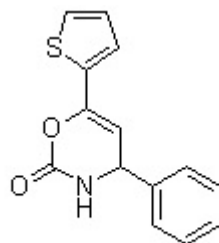

(<sup>1</sup>H NMR, 400 MHz, DMSO-*d*<sub>6</sub>)

1.00

0.97

6.00

1.00

1.00

1.00

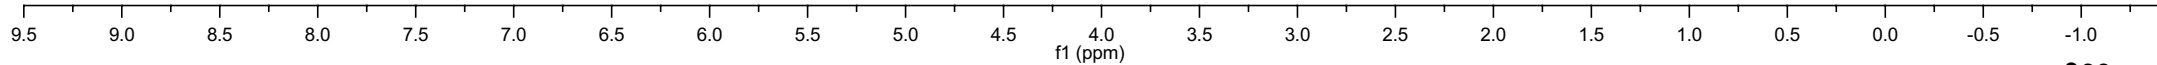

# NMR spectra of compound 3ap

— 148.640  
— 142.501  
— 142.392  
— 134.978  
— 128.788  
— 127.955  
— 127.901  
— 126.831  
— 126.505  
— 124.797  
— 98.711  
— 54.068

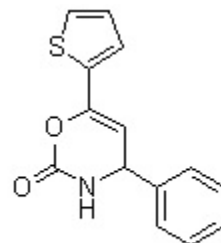

(<sup>13</sup>C NMR, 100 MHz, DMSO-*d*<sub>6</sub>)

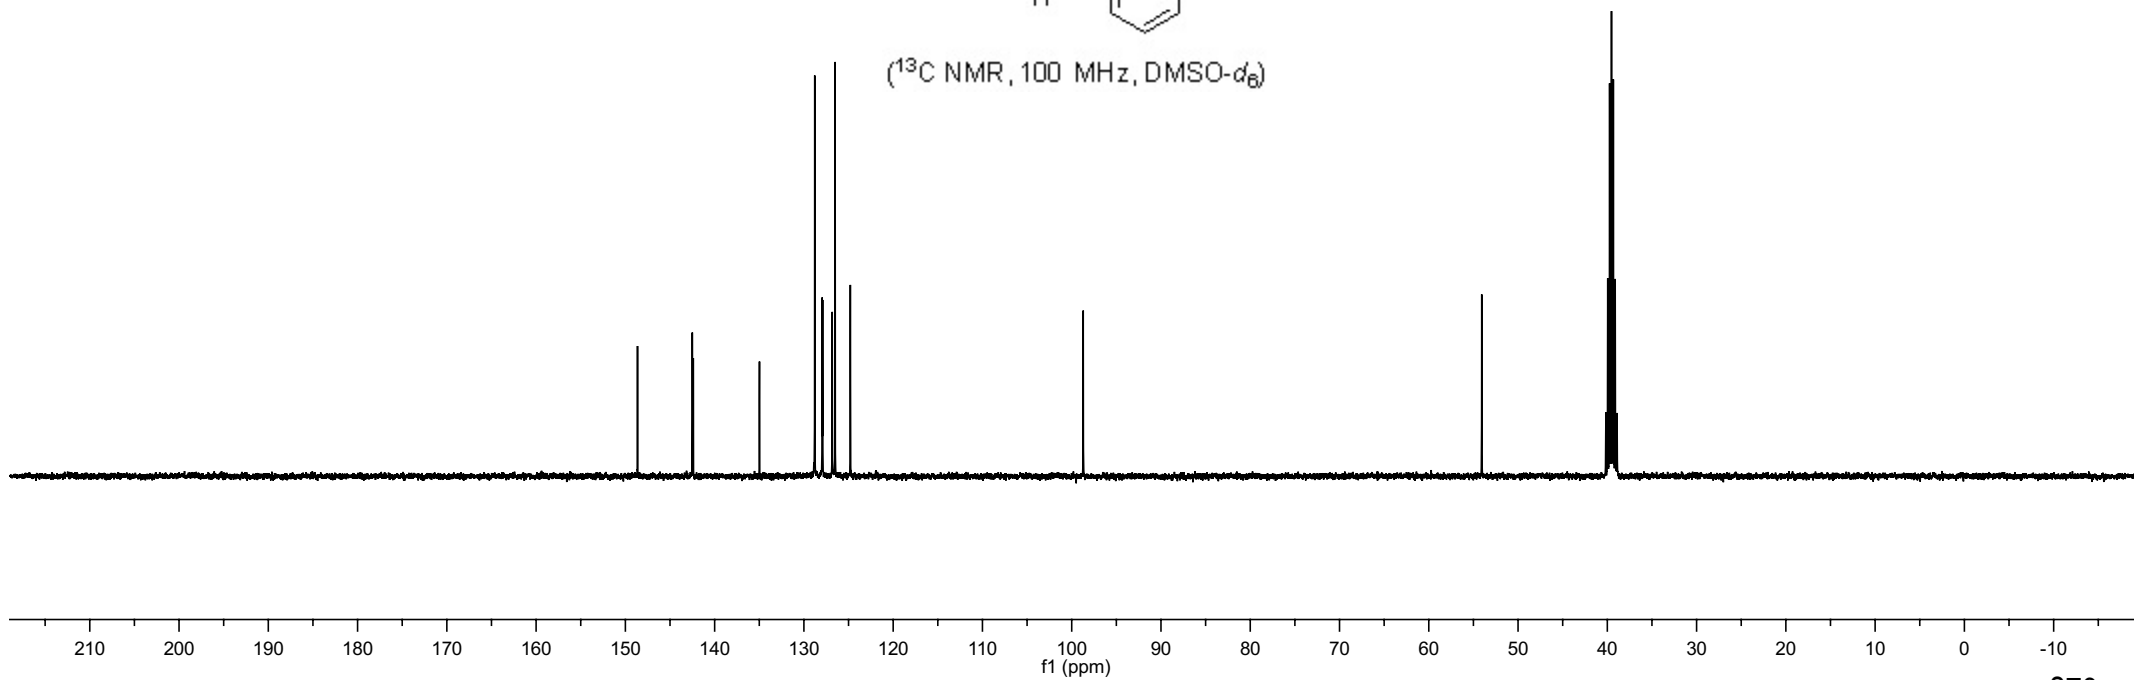

# NMR spectra of compound 3aq

7.388  
7.385  
7.381  
7.372  
7.368  
7.364  
7.352  
7.349  
7.329  
7.325  
7.321  
7.313  
7.307  
7.299  
7.292  
7.285  
7.281  
7.275  
7.264

6.247

5.018  
5.014  
5.010  
5.006  
4.898  
4.894  
4.890  
4.885

1.502  
1.489  
1.481  
1.476  
1.468  
1.459  
1.455  
1.447  
1.434  
0.833  
0.820  
0.816  
0.807  
0.803  
0.793  
0.723  
0.713  
0.707  
0.702  
0.693  
0.687  
0.675

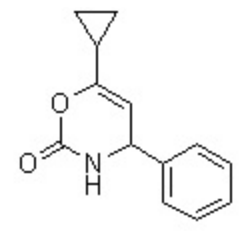

(<sup>1</sup>H NMR, 400 MHz, CDCl<sub>3</sub>)

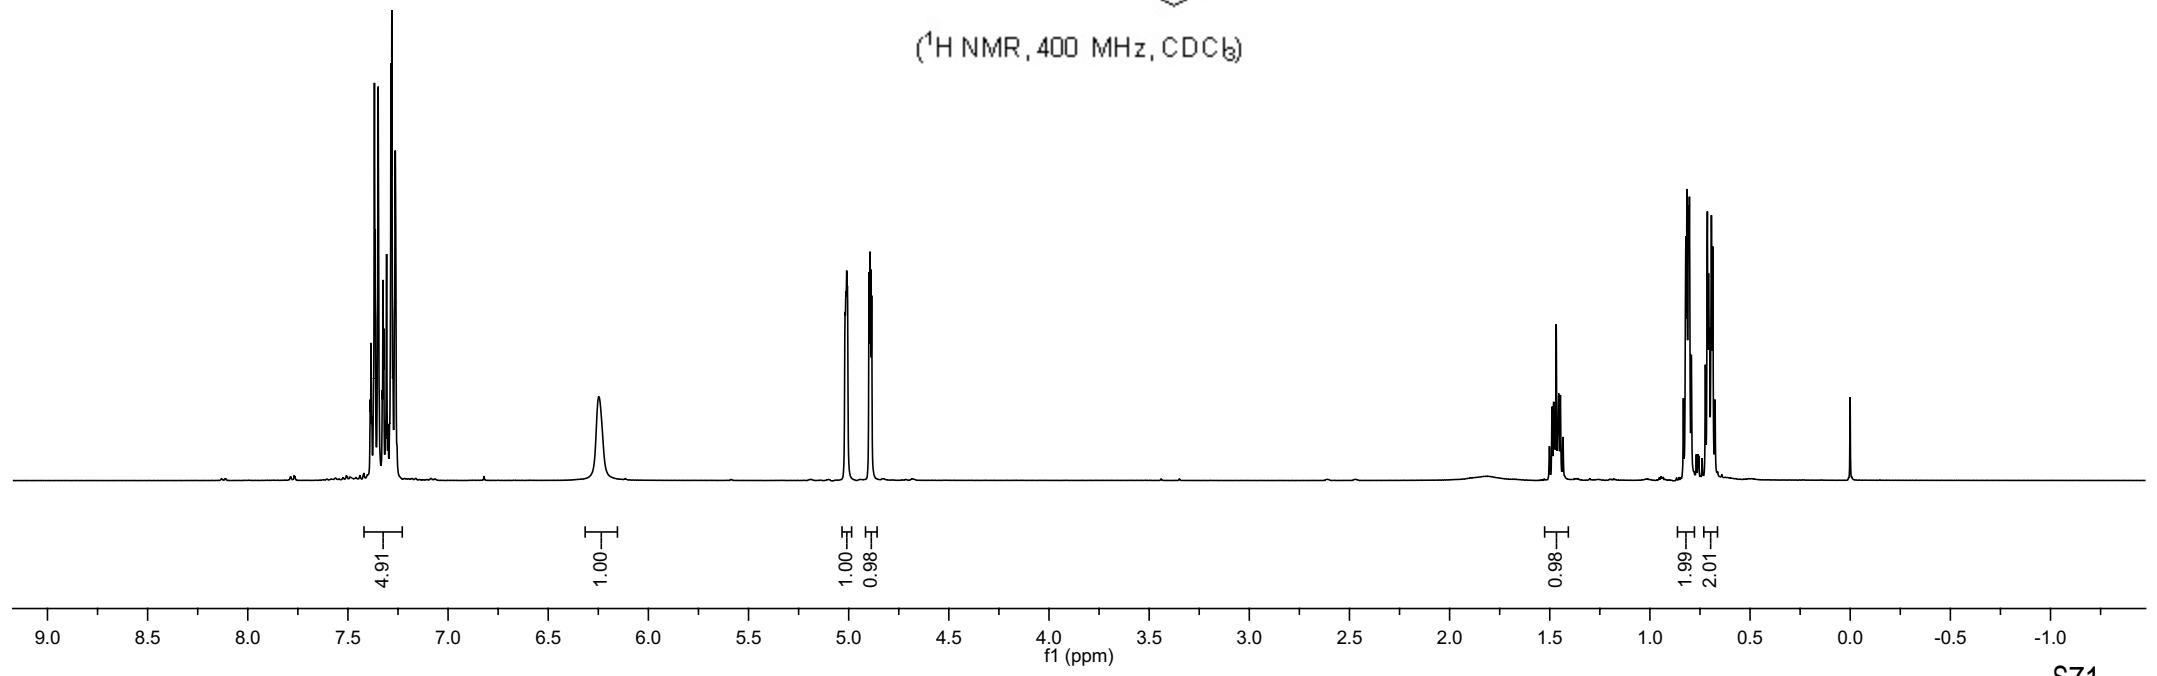

NMR spectra of compound **3aq**

—150.587

—142.022

—129.040

—128.412

—126.511

—97.132

—55.455

—12.468

—4.658

—4.558

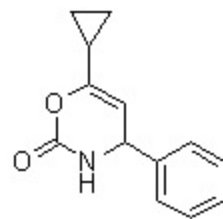

(<sup>13</sup>C NMR, 100 MHz, CDCl<sub>3</sub>)

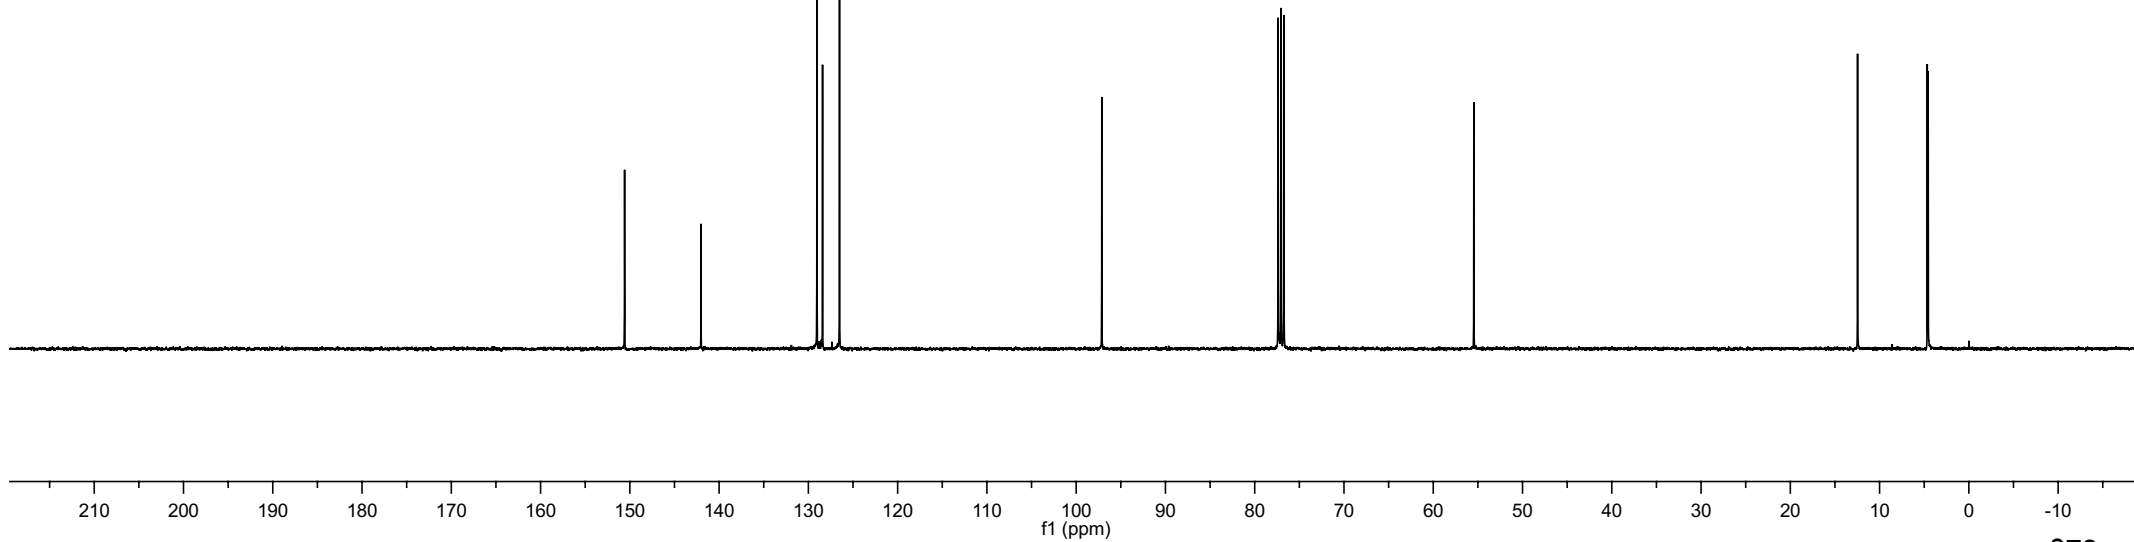



NMR spectra of compound 3ba

7.631  
7.623  
7.620  
7.612  
7.607  
7.599  
7.547  
7.342  
7.333  
7.244  
7.223  
7.188  
7.168

6.372

5.591  
5.587  
5.582  
5.578  
5.190  
5.186  
5.181  
5.178

2.333

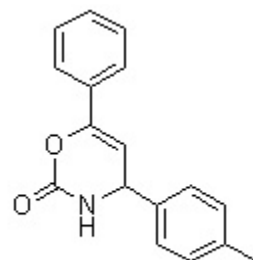

(<sup>1</sup>H NMR, 400 MHz, CDCl<sub>3</sub>)

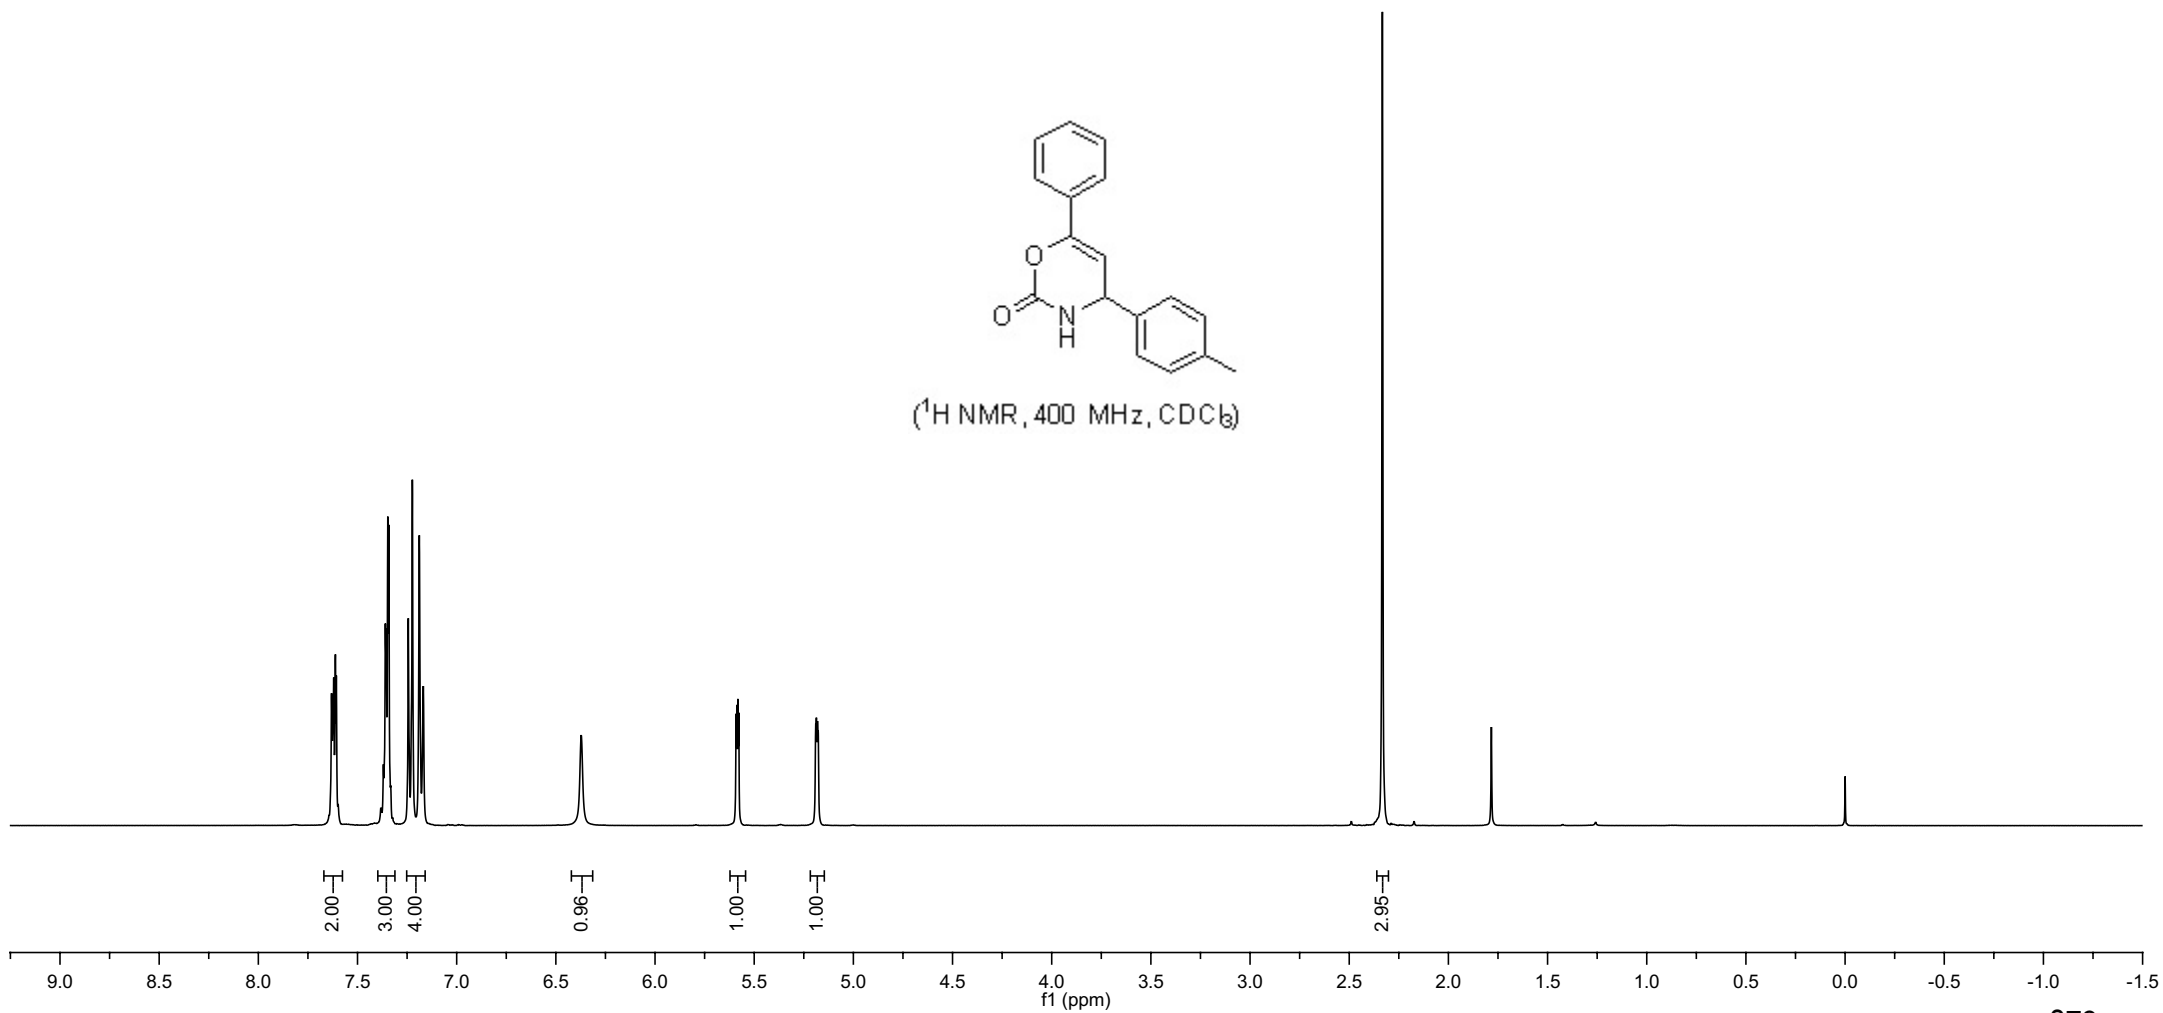

NMR spectra of compound **3ba**

— 150.499  
— 147.460  
— 138.644  
— 138.529  
— 131.627  
— 129.823  
— 129.404  
— 128.506  
— 126.865  
— 124.766

— 99.038

— 55.454

— 21.133

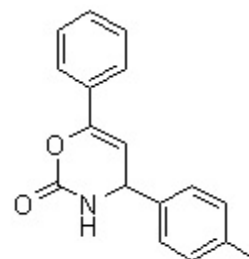

(<sup>13</sup>C NMR, 100 MHz, CDCl<sub>3</sub>)

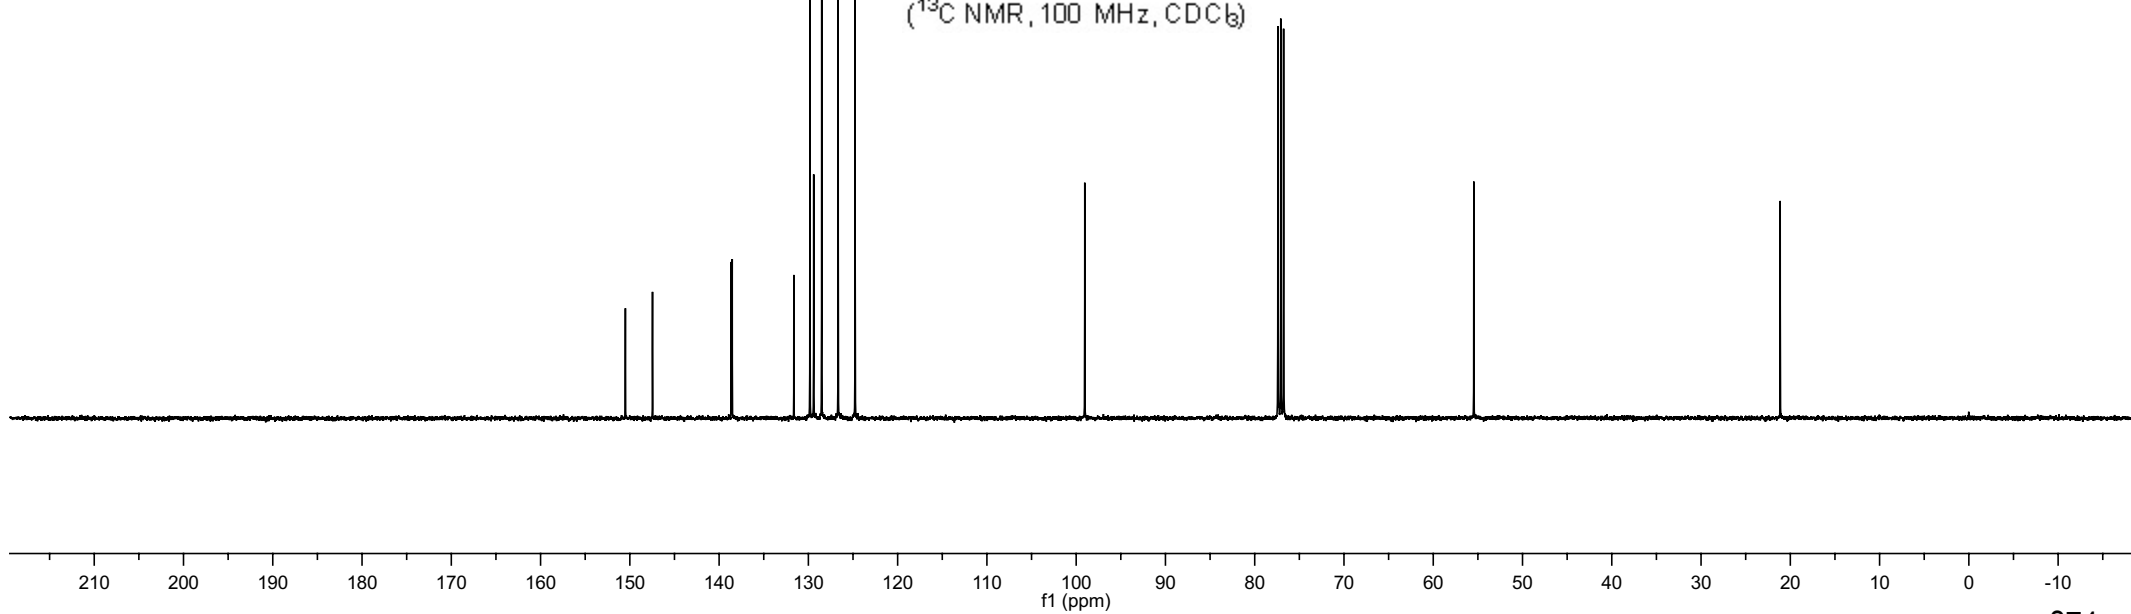

NMR spectra of compound 3ca

8.342

7.666  
7.662  
7.646  
7.643

7.412  
7.401  
7.394  
7.389  
7.382  
7.292  
7.272

6.003  
5.999  
5.992  
5.989

5.188  
5.183  
5.178  
5.173

1.270

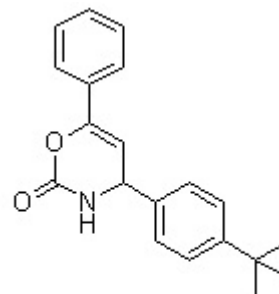

(<sup>1</sup>H NMR, 400 MHz, DMSO-*d*<sub>6</sub>)

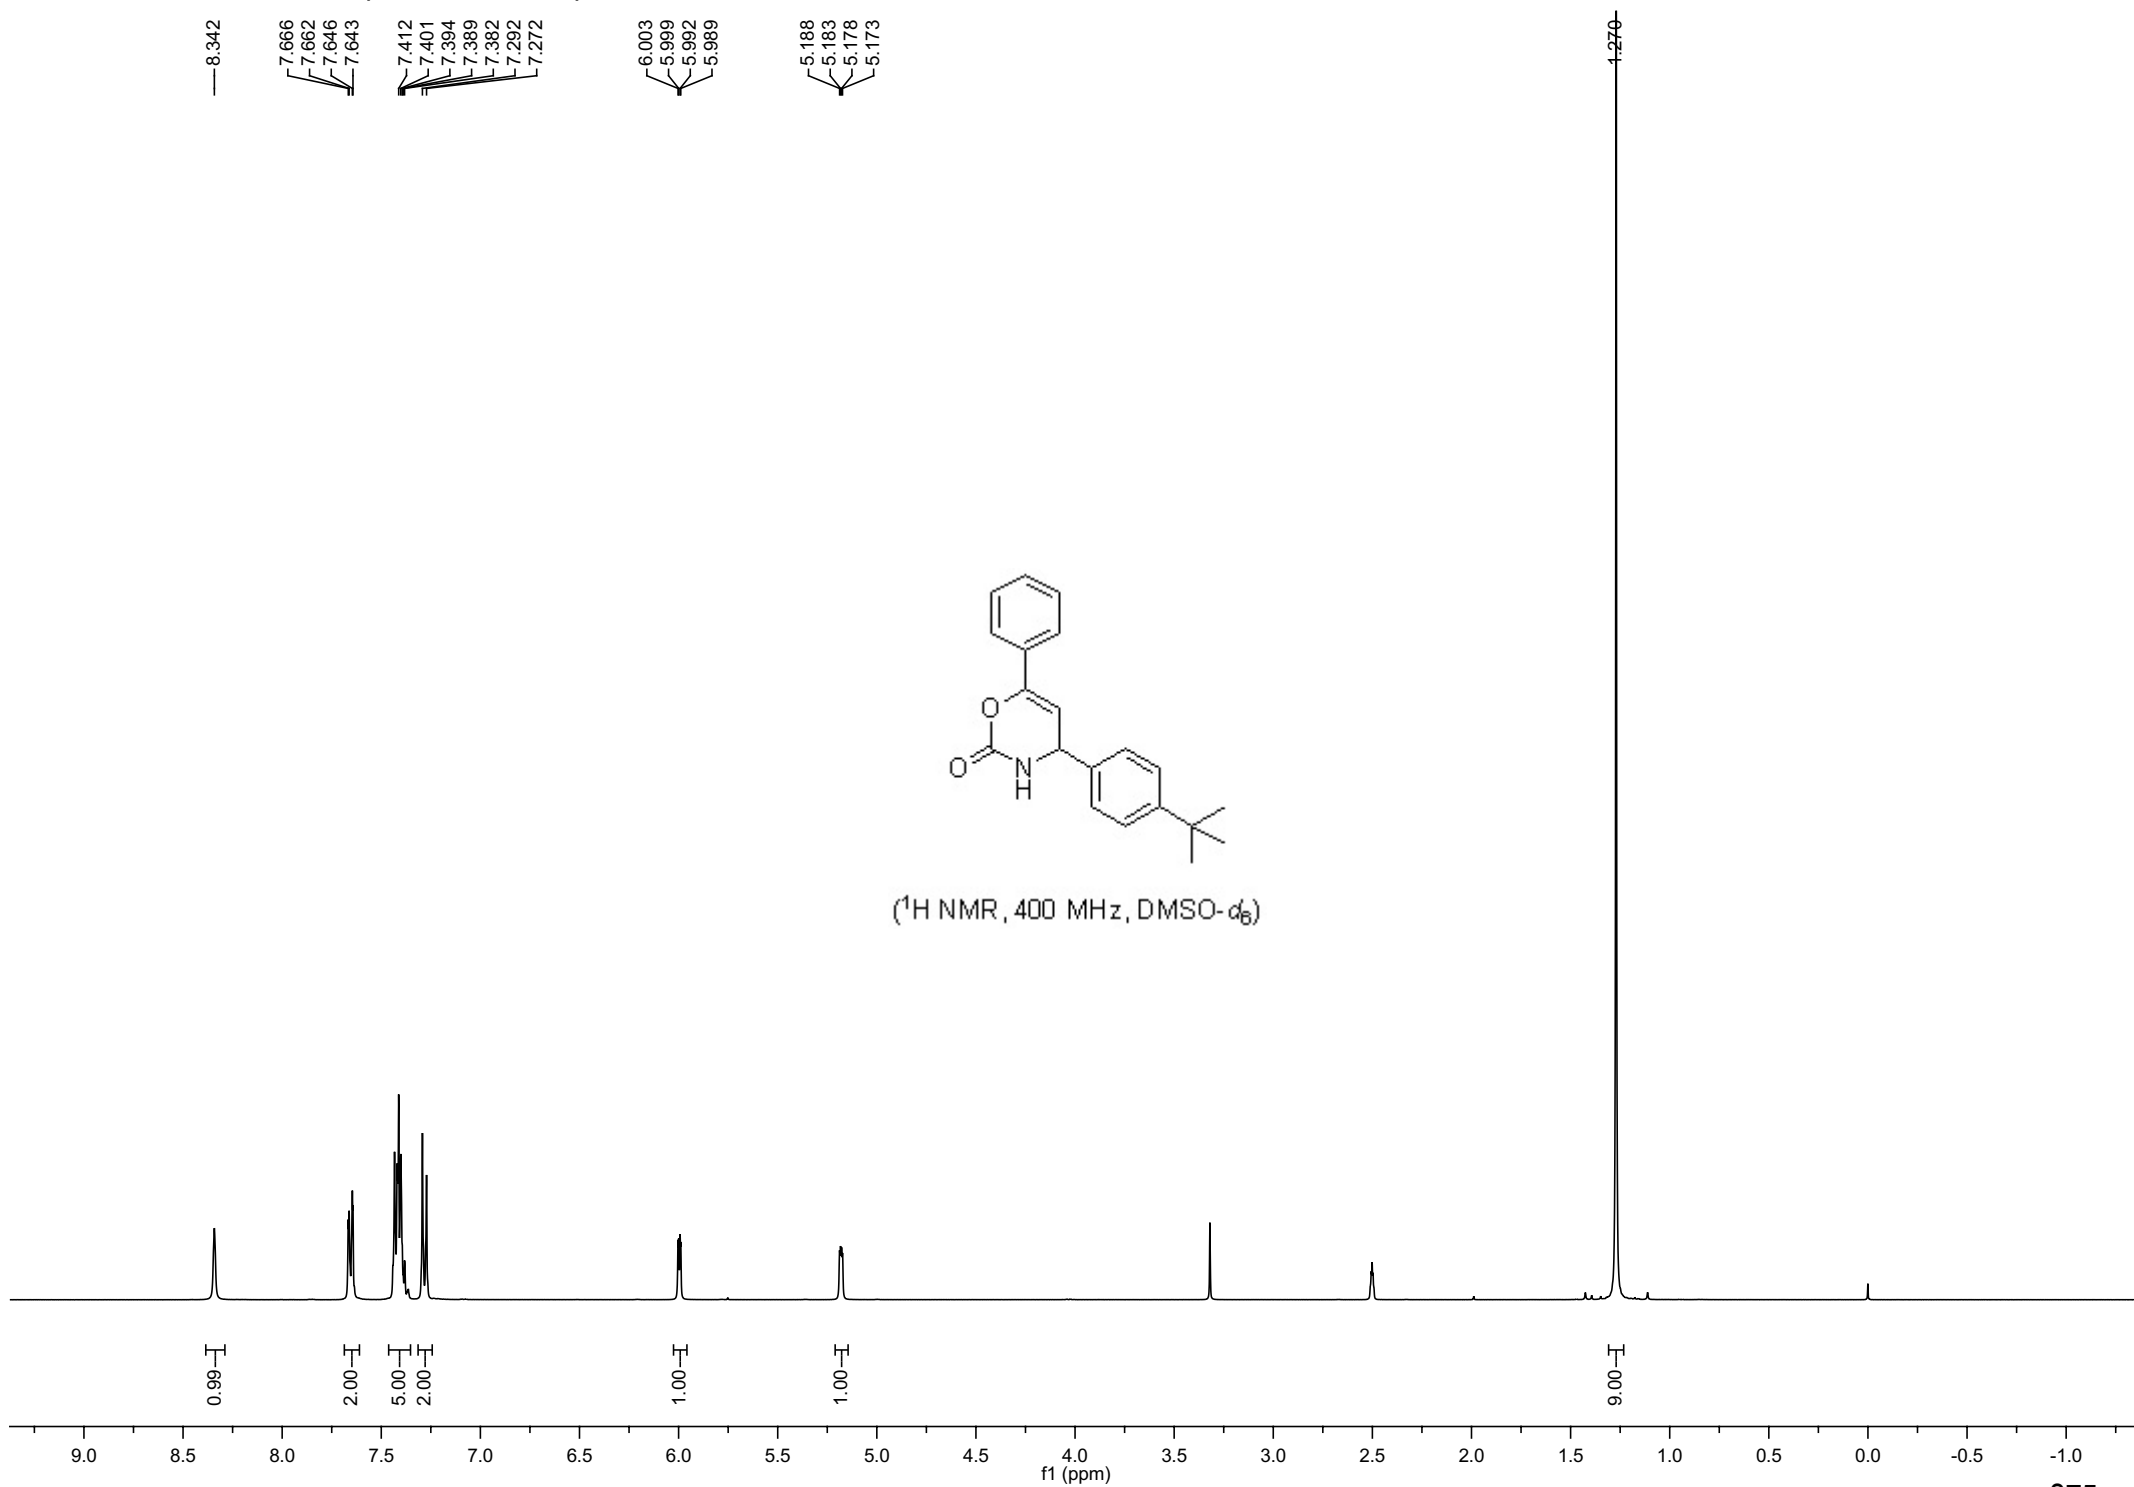

NMR spectra of compound 3ca

150.878  
149.615  
146.503  
140.249

132.173  
129.604  
129.085  
126.796  
126.002  
124.708

100.596

54.296

34.741  
31.581

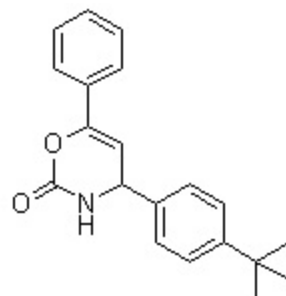

(<sup>13</sup>C NMR, 100 MHz, DMSO-*d*<sub>6</sub>)

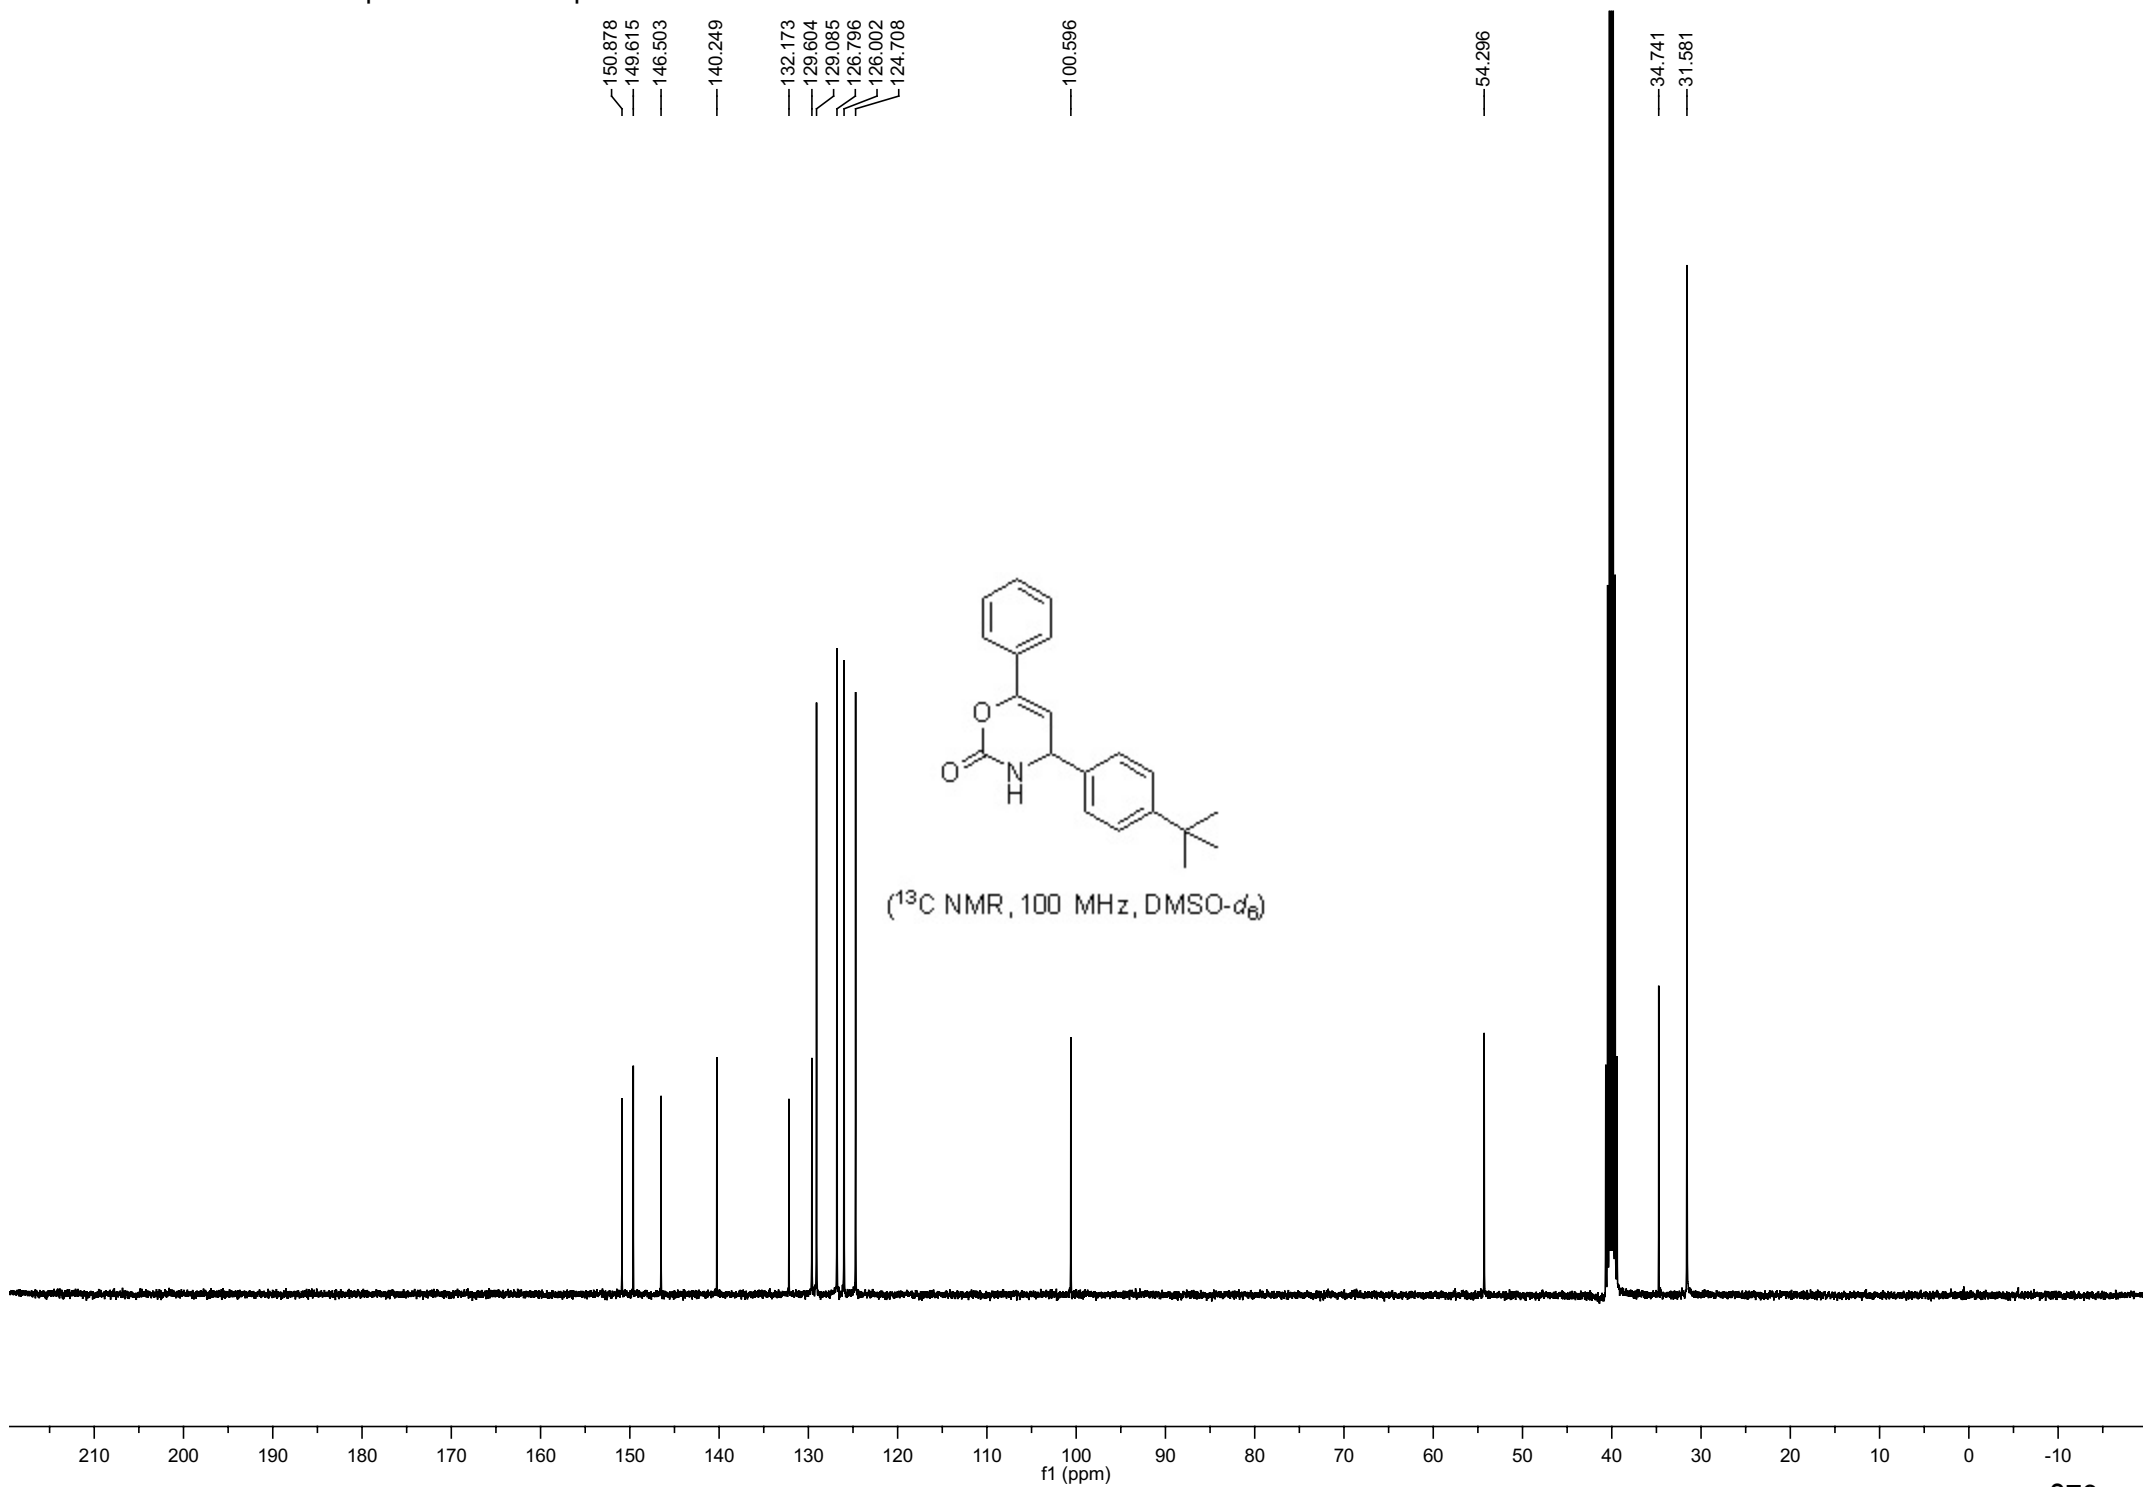

NMR spectra of compound 3da

8.351

7.670  
7.666  
7.650  
7.647

7.425  
7.393  
7.269  
6.973  
6.952

5.976  
5.972  
5.965  
5.962

5.175  
5.170  
5.165  
5.160

3.749

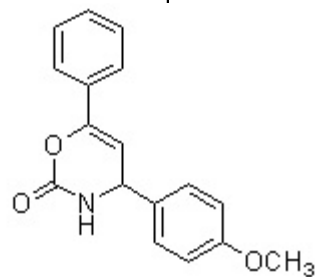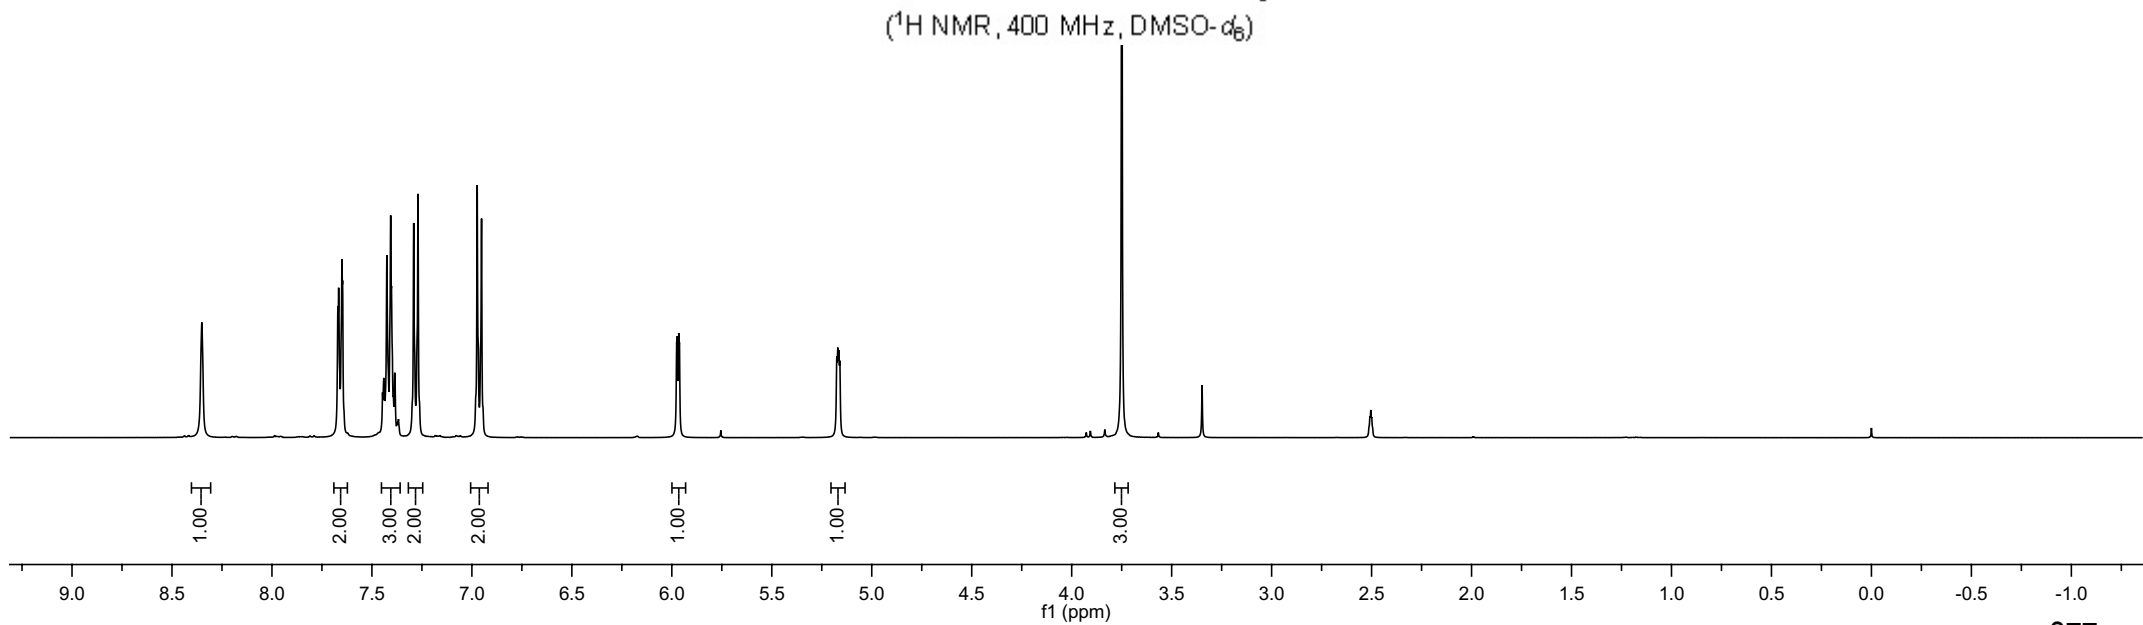

NMR spectra of compound 3da

— 158.970  
— 149.101  
— 146.024  
— 134.723  
— 131.710  
— 127.843  
— 124.218  
— 114.104  
— 100.183  
— 55.156  
— 53.520

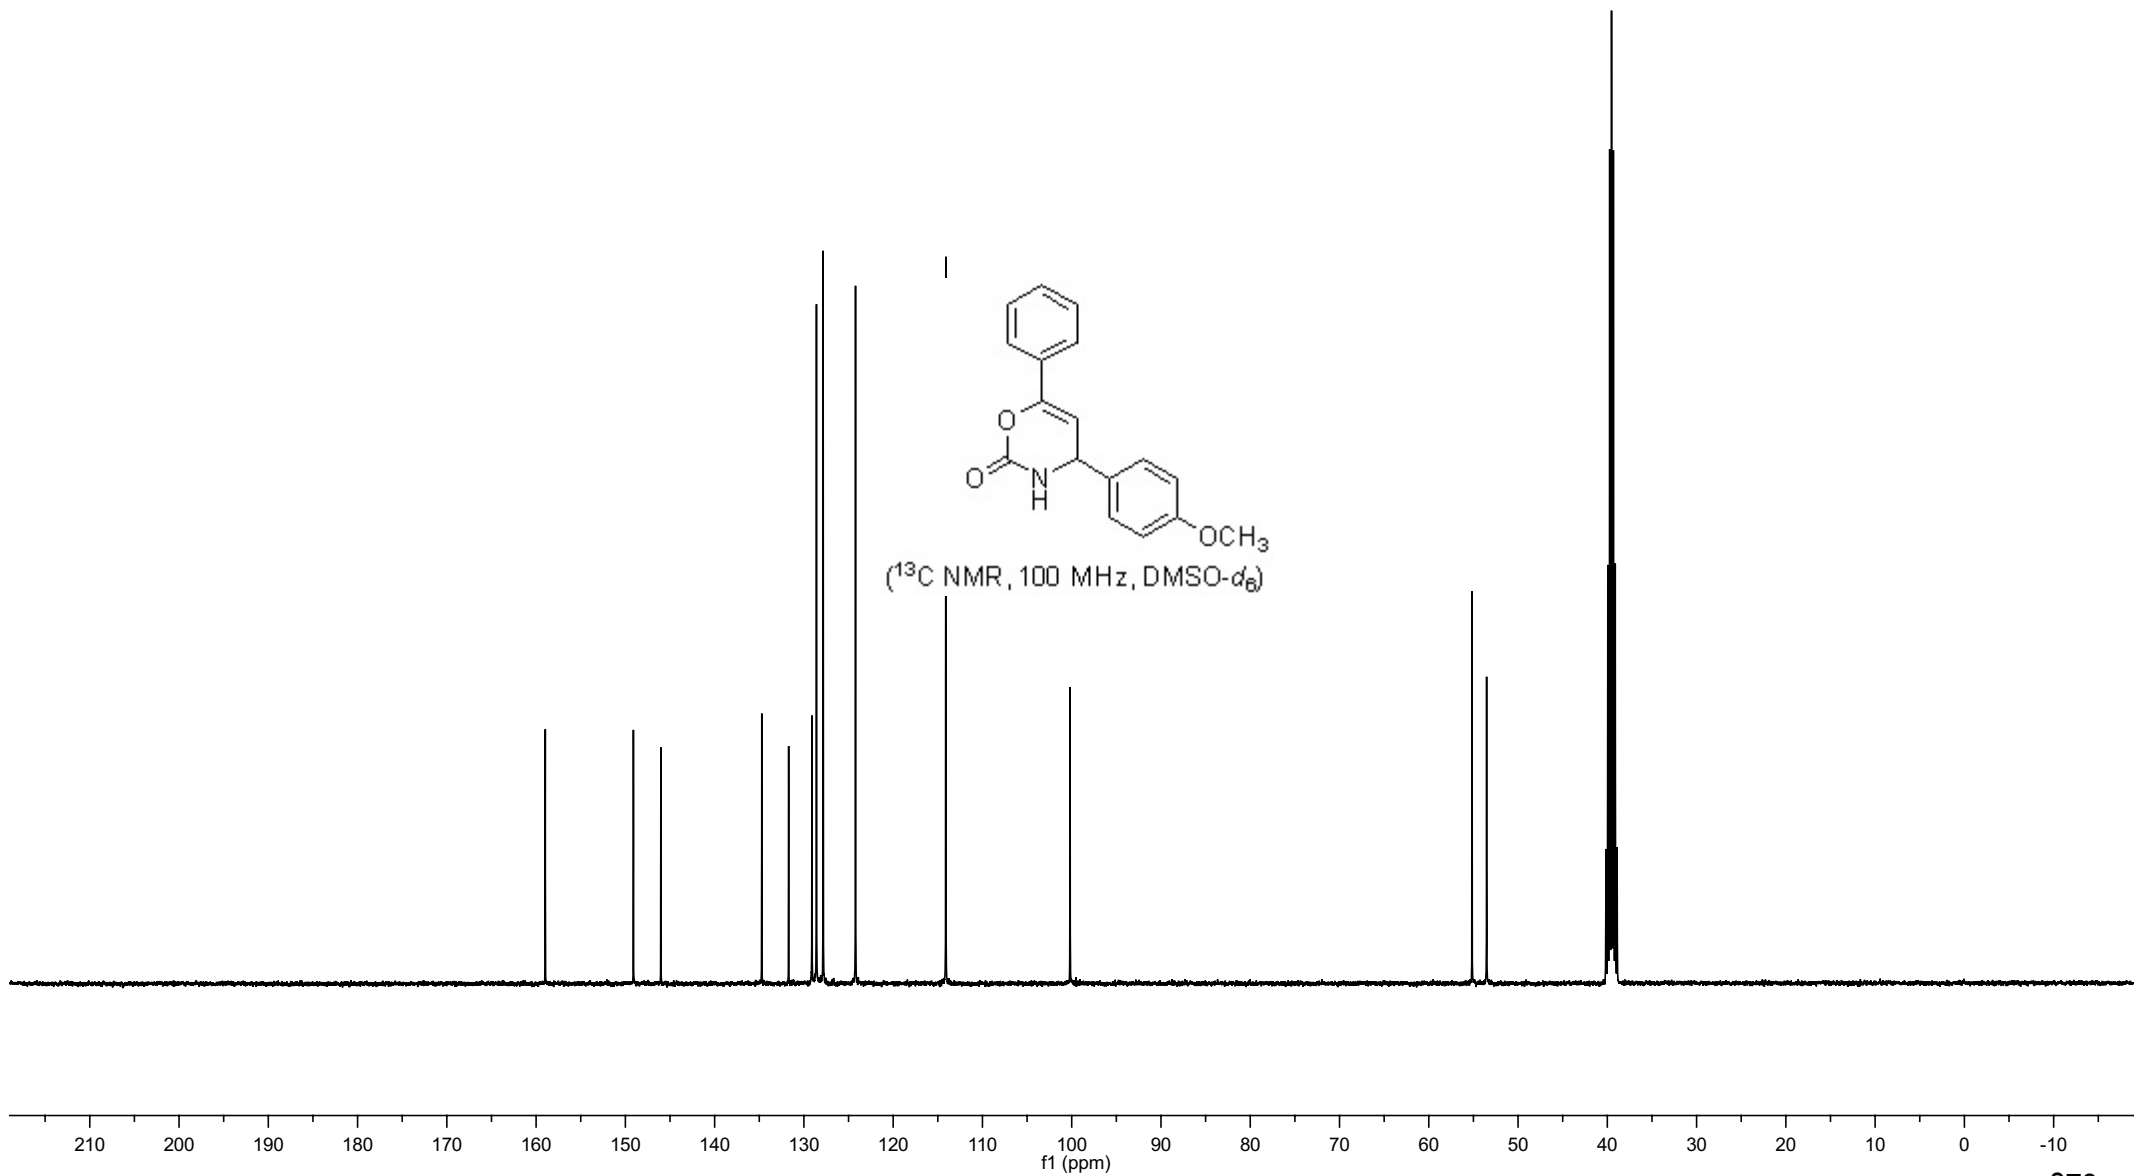

# NMR spectra of compound 3ea

—150.518  
—147.889  
—140.538  
—132.331  
—129.647  
—128.580  
—128.437  
—124.798  
—122.648  
—98.265  
—55.110

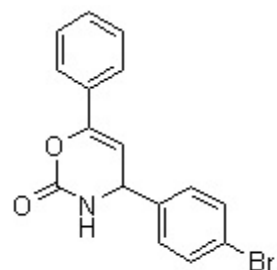

(<sup>13</sup>C NMR, 100 MHz, CDCl<sub>3</sub>)

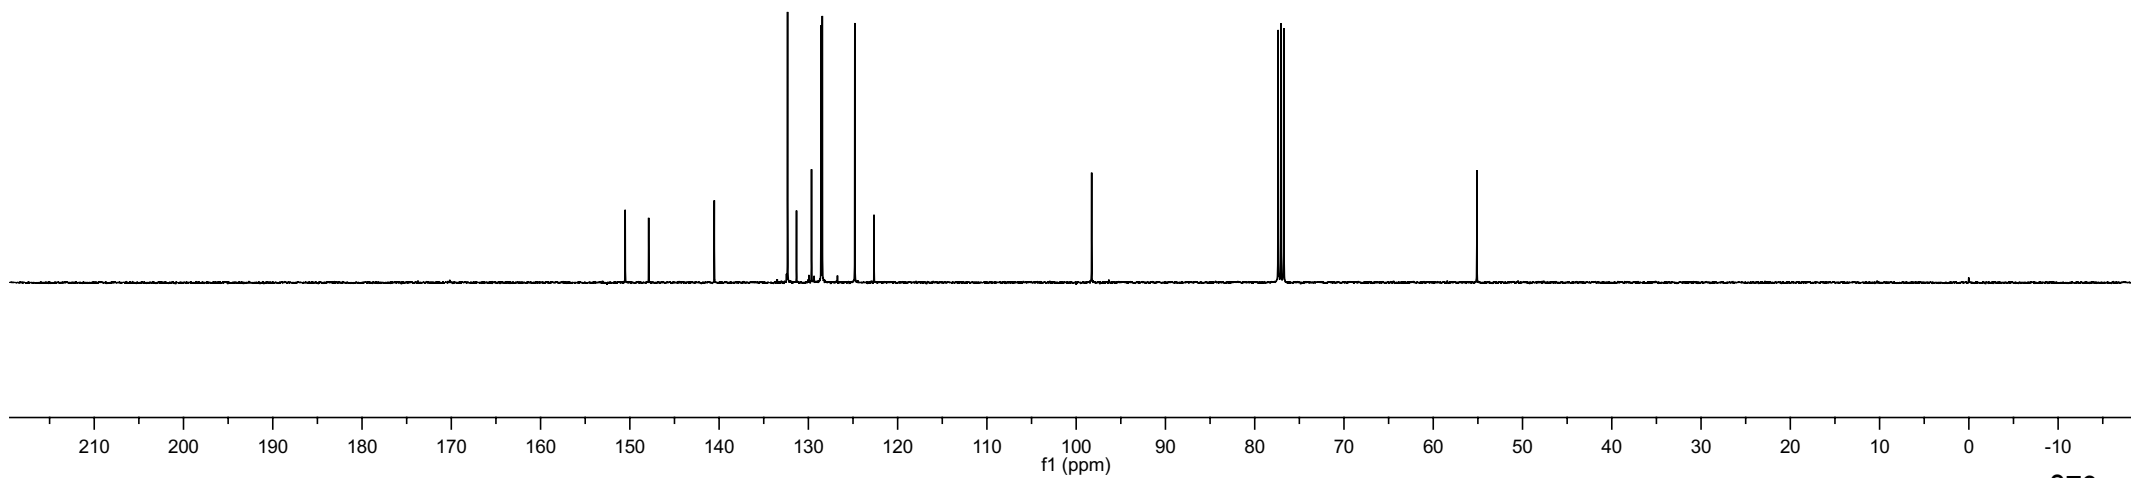

NMR spectra of compound 3ea

—150.518  
—147.889  
—140.538  
—132.331  
—129.647  
—128.580  
—128.437  
—124.798  
—122.648  
—98.265  
—55.110

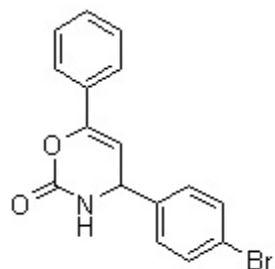

(<sup>13</sup>C NMR, 100 MHz, CDCl<sub>3</sub>)

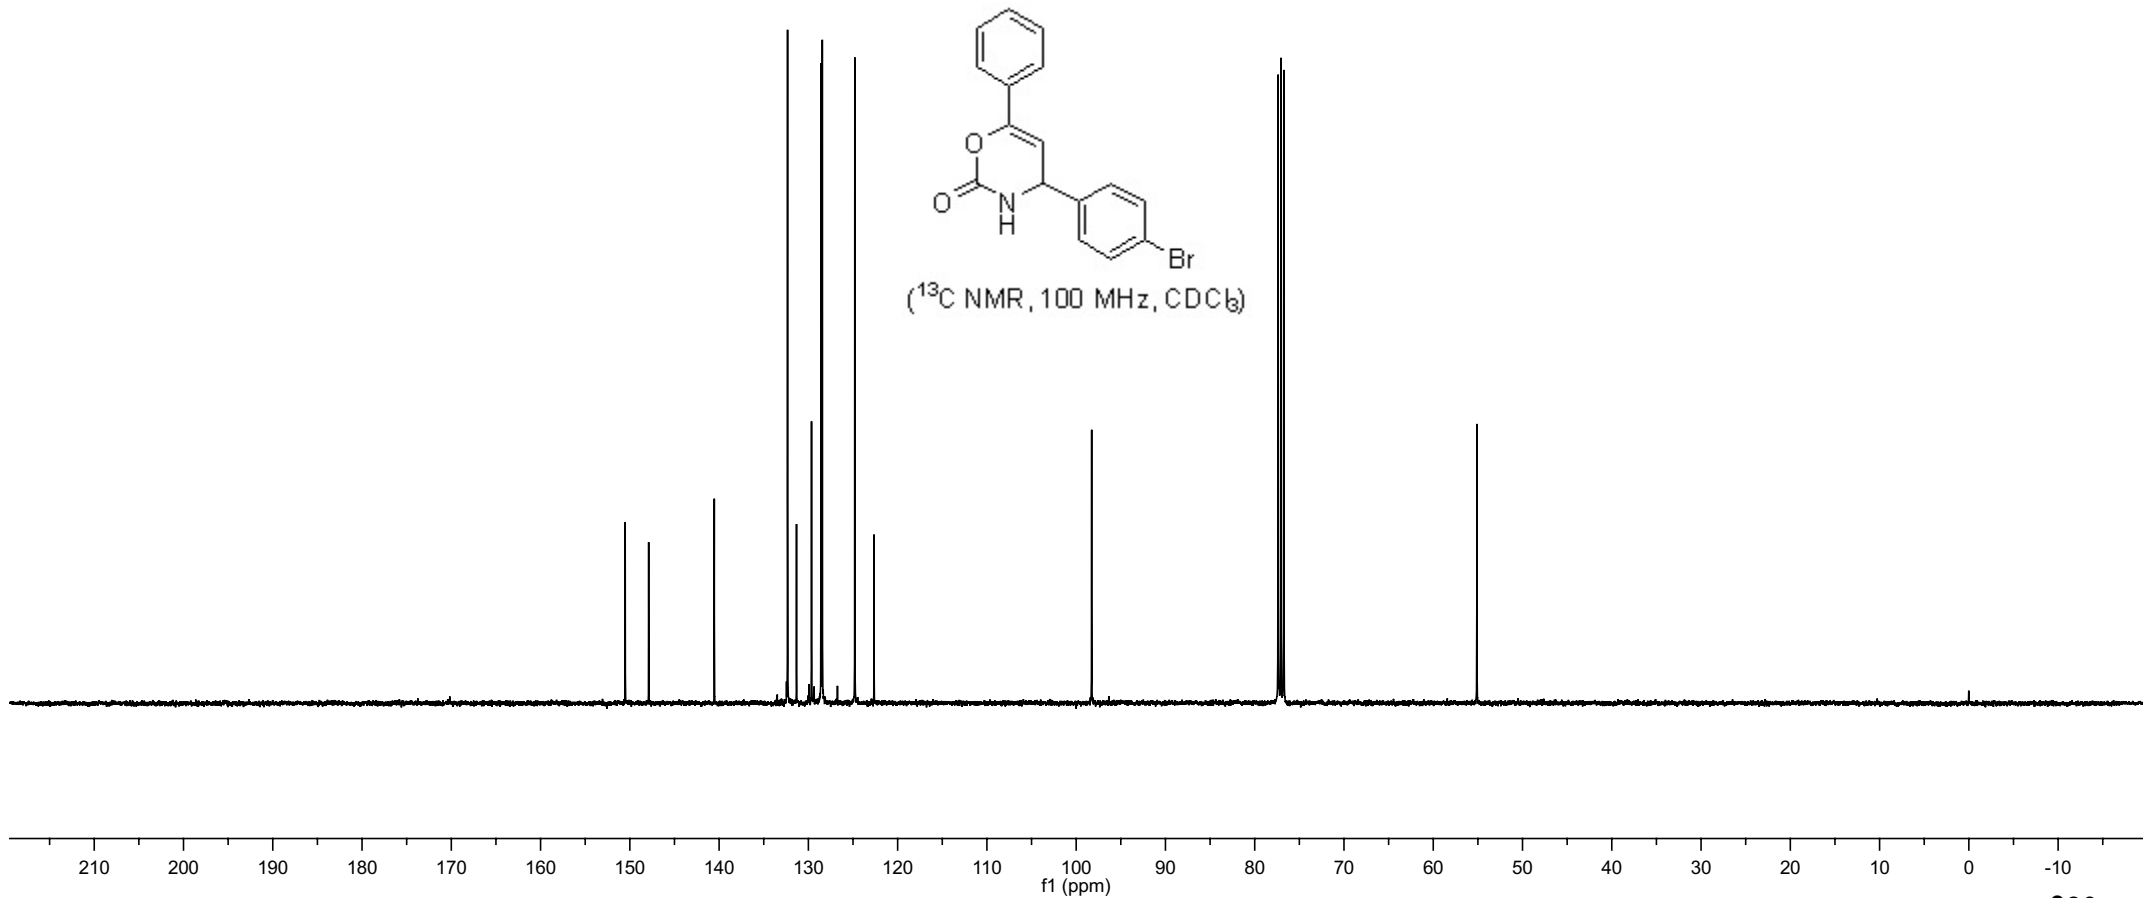



NMR spectra of compound 3fa

7.669  
7.649  
7.634  
7.626  
7.624  
7.620  
7.617  
7.613  
7.609  
7.508  
7.487  
7.394  
7.384  
7.376  
7.368  
7.358  
7.257  
— 6.757

5.601  
5.596  
5.591  
5.587  
5.331  
5.327  
5.322  
5.318

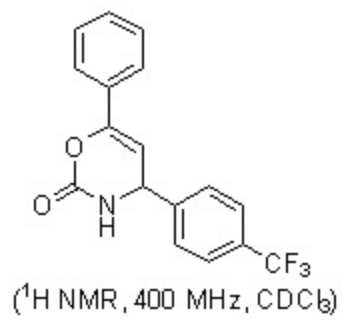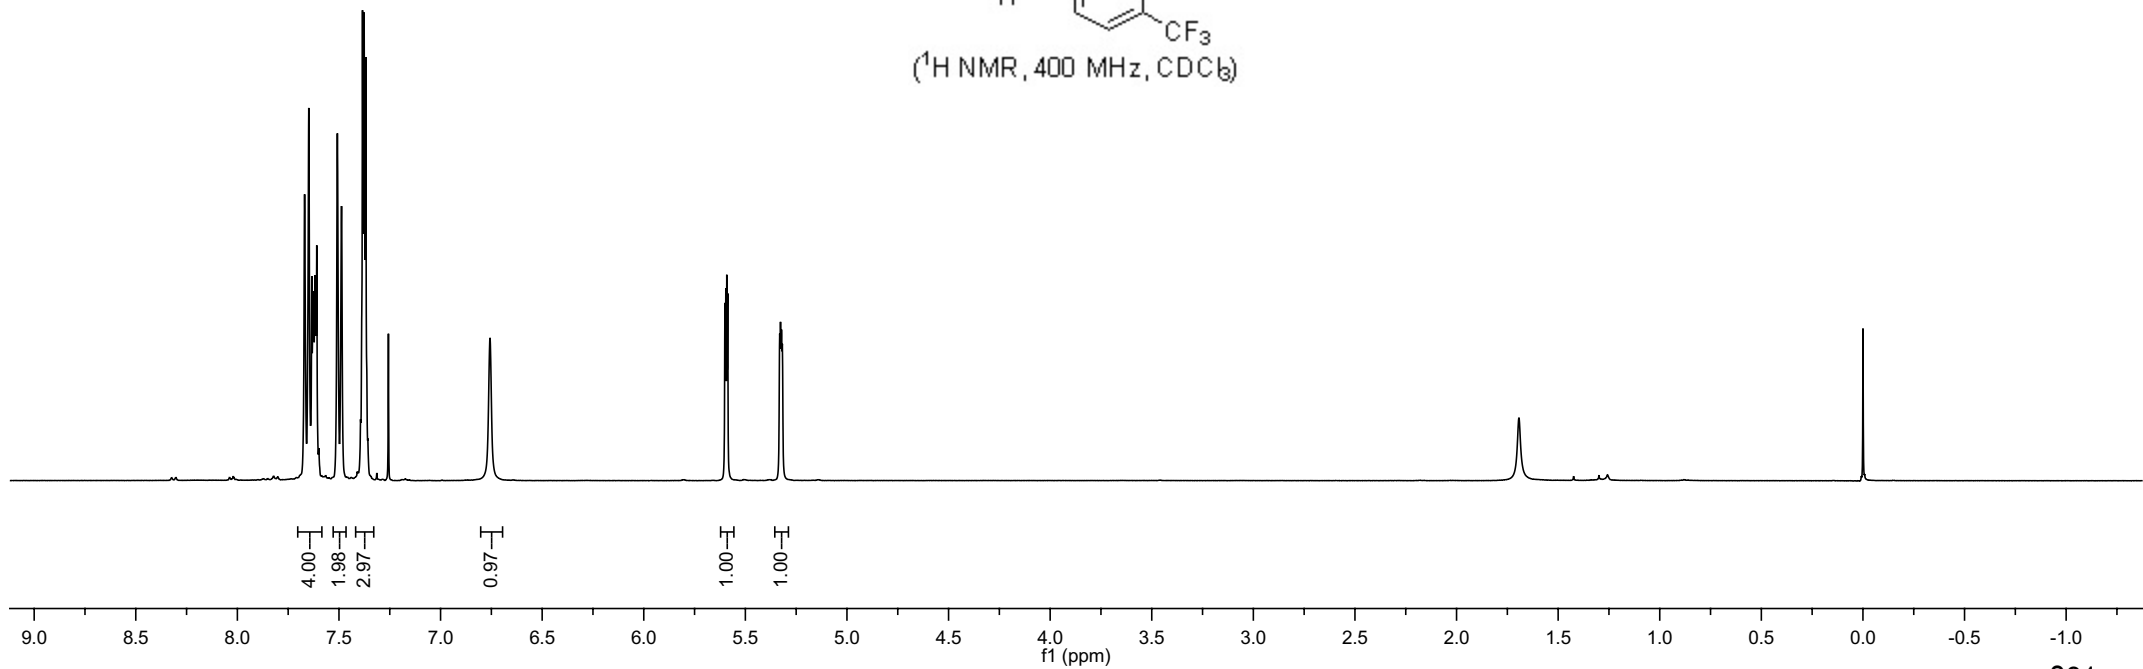

# NMR spectra of compound 3fa

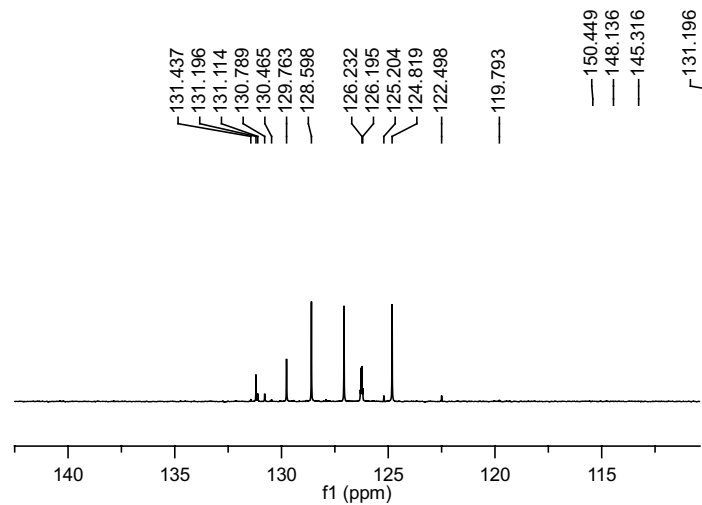

- 150.449
- 148.136
- 145.316
- 131.196
- 129.763
- 127.910
- 126.306
- 126.232
- 125.204
- 122.498
- 119.793

97.923

55.293

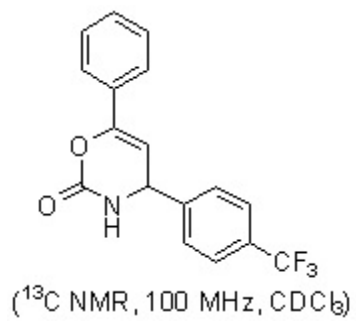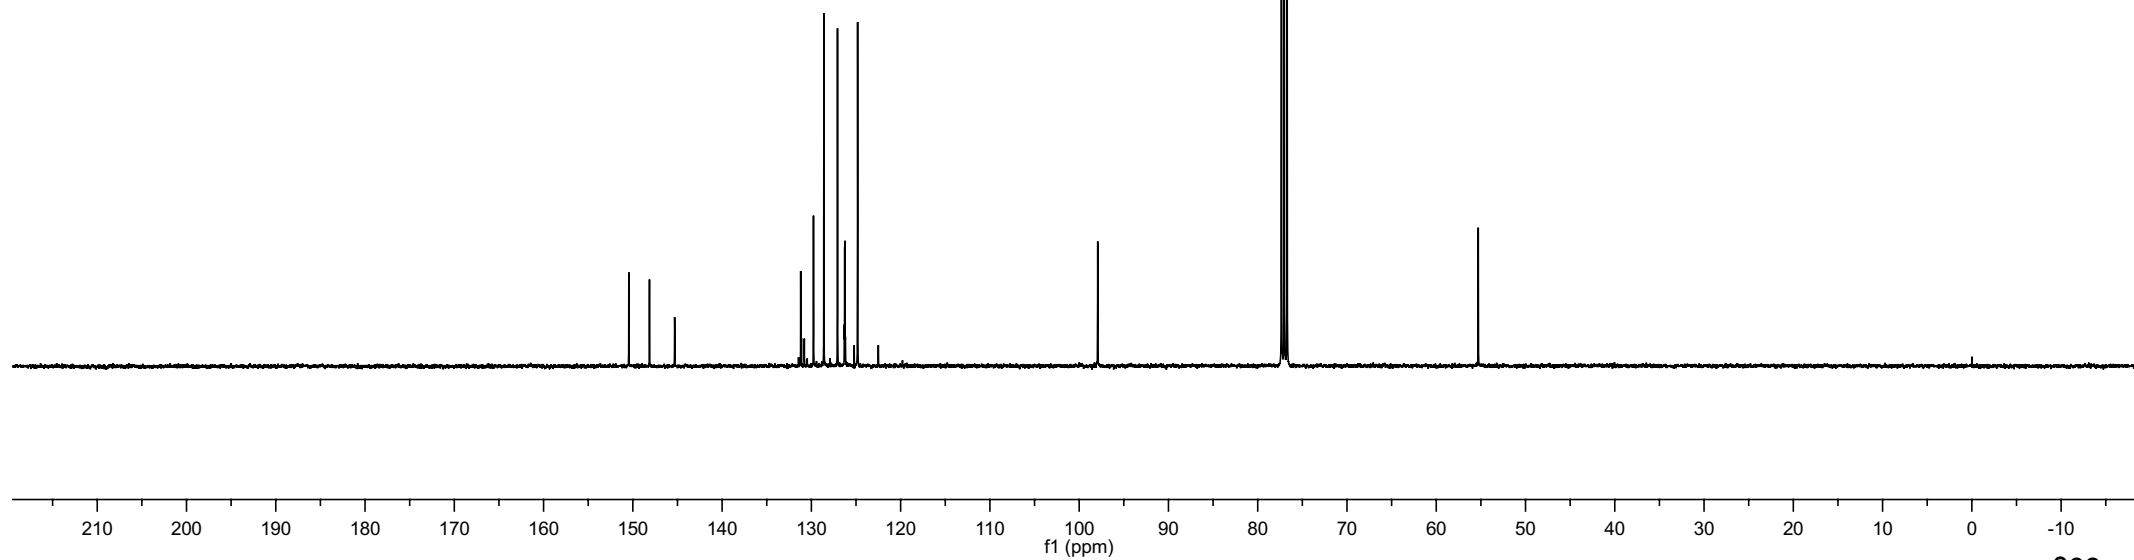

NMR spectra of compound 3fa

—62.650

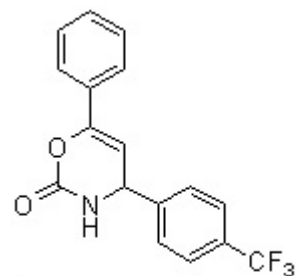

(<sup>19</sup>F NMR, 376 MHz, CDCl<sub>3</sub>)

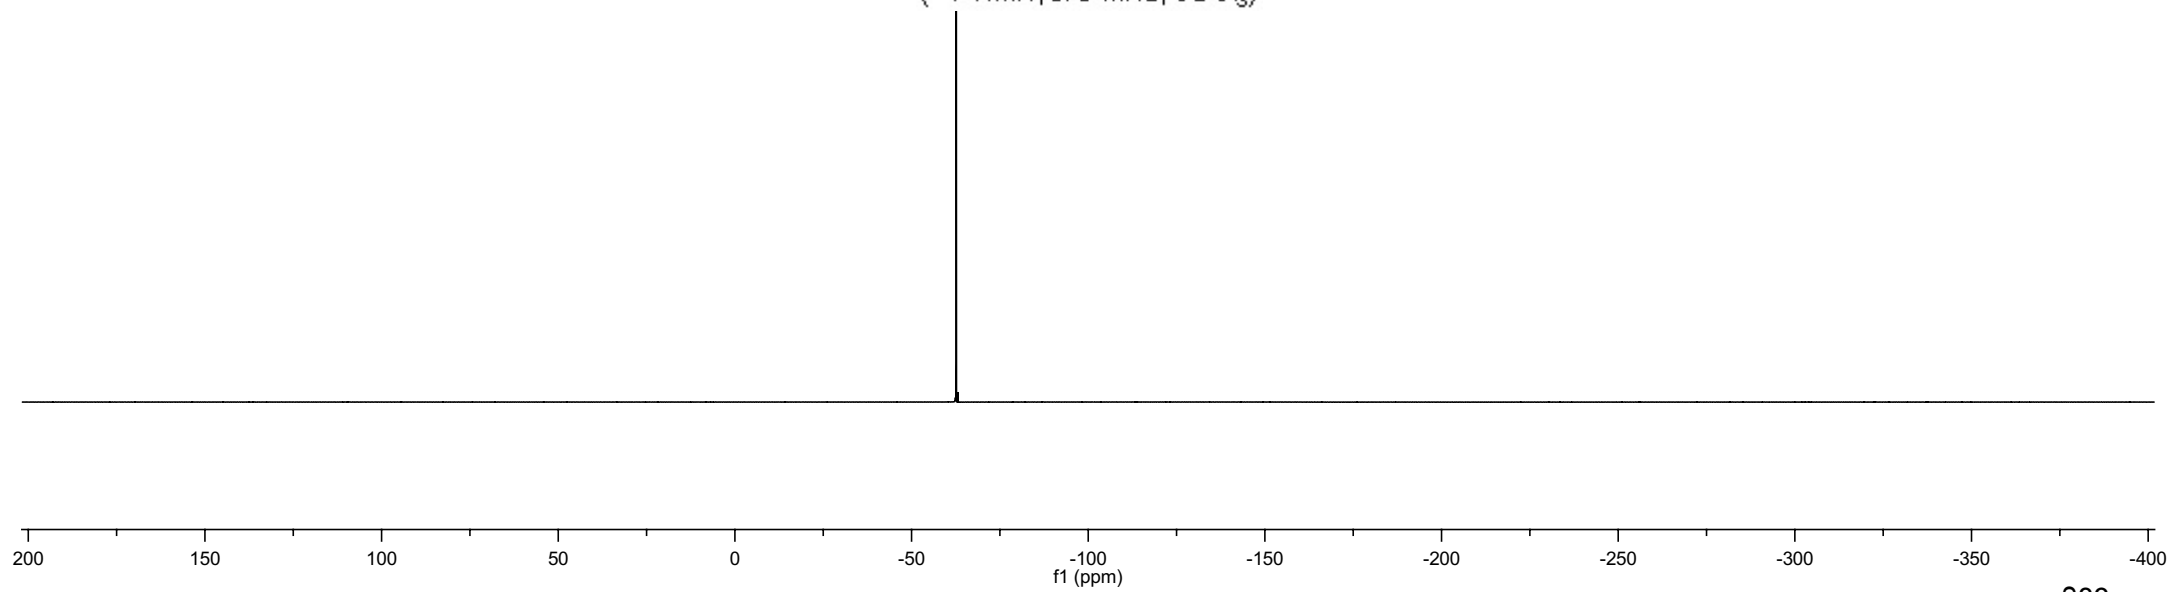

NMR spectra of compound **3ga**

8.538  
 7.908  
 7.888  
 7.587  
 7.456  
 7.448  
 7.443  
 7.434  
 7.416  
 7.402  
 6.063  
 6.060  
 6.053  
 6.050  
 5.381  
 5.376  
 5.371  
 5.366

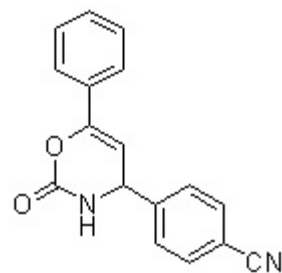

(<sup>1</sup>H NMR, 400 MHz, DMSO-*d*<sub>6</sub>)

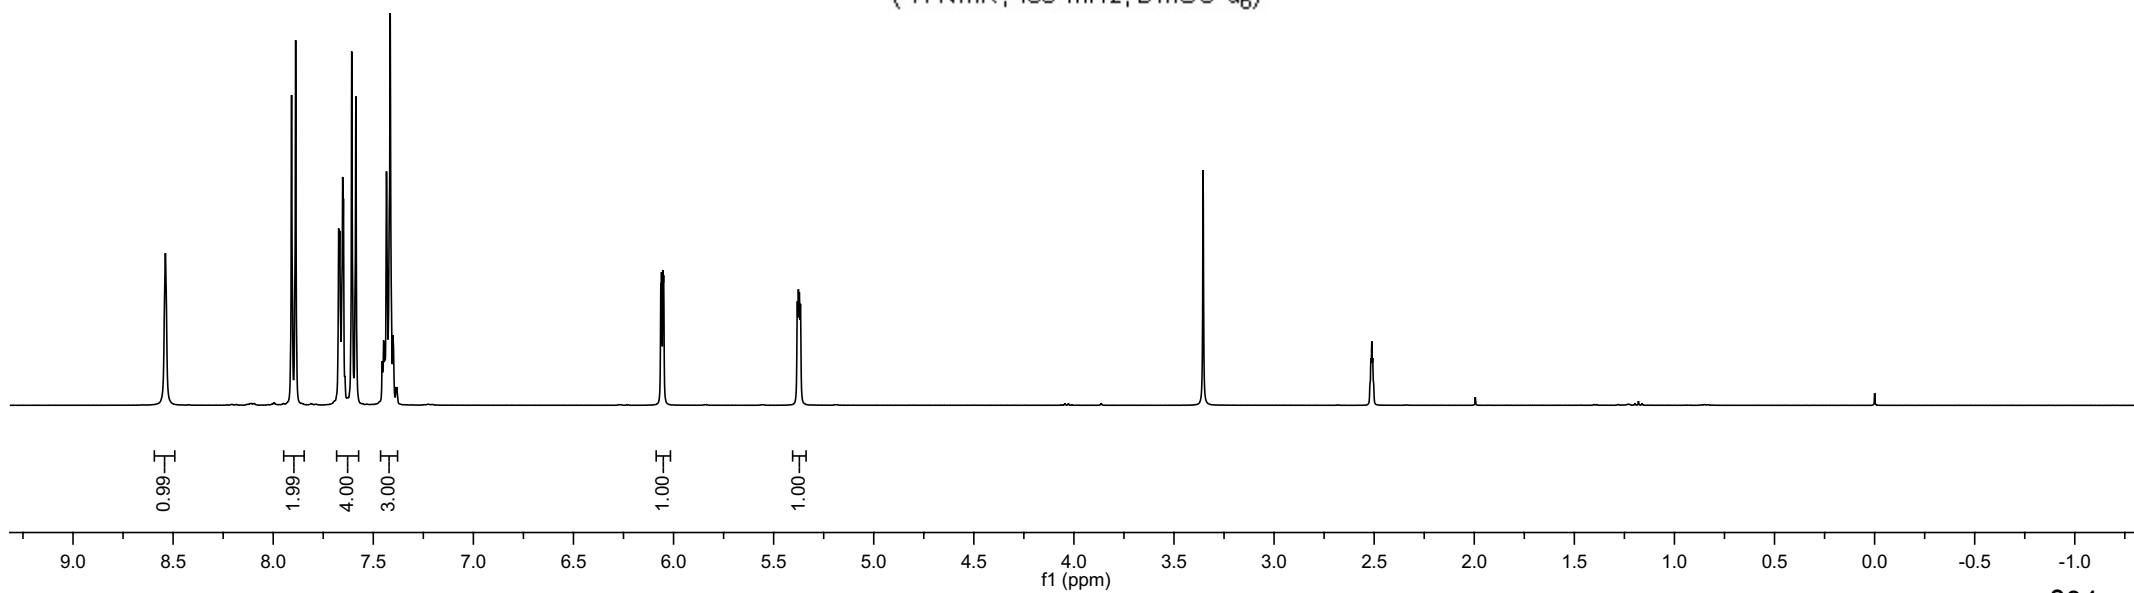

NMR spectra of compound 3ga

148.987  
147.876  
146.652

132.827  
131.411  
129.345  
128.624  
127.535  
124.319

118.621

110.613

98.919

53.703

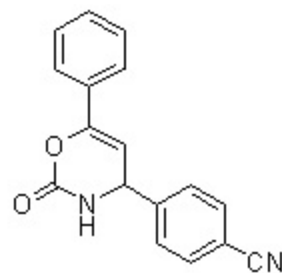

(<sup>13</sup>C NMR, 100 MHz, DMSO-*d*<sub>6</sub>)

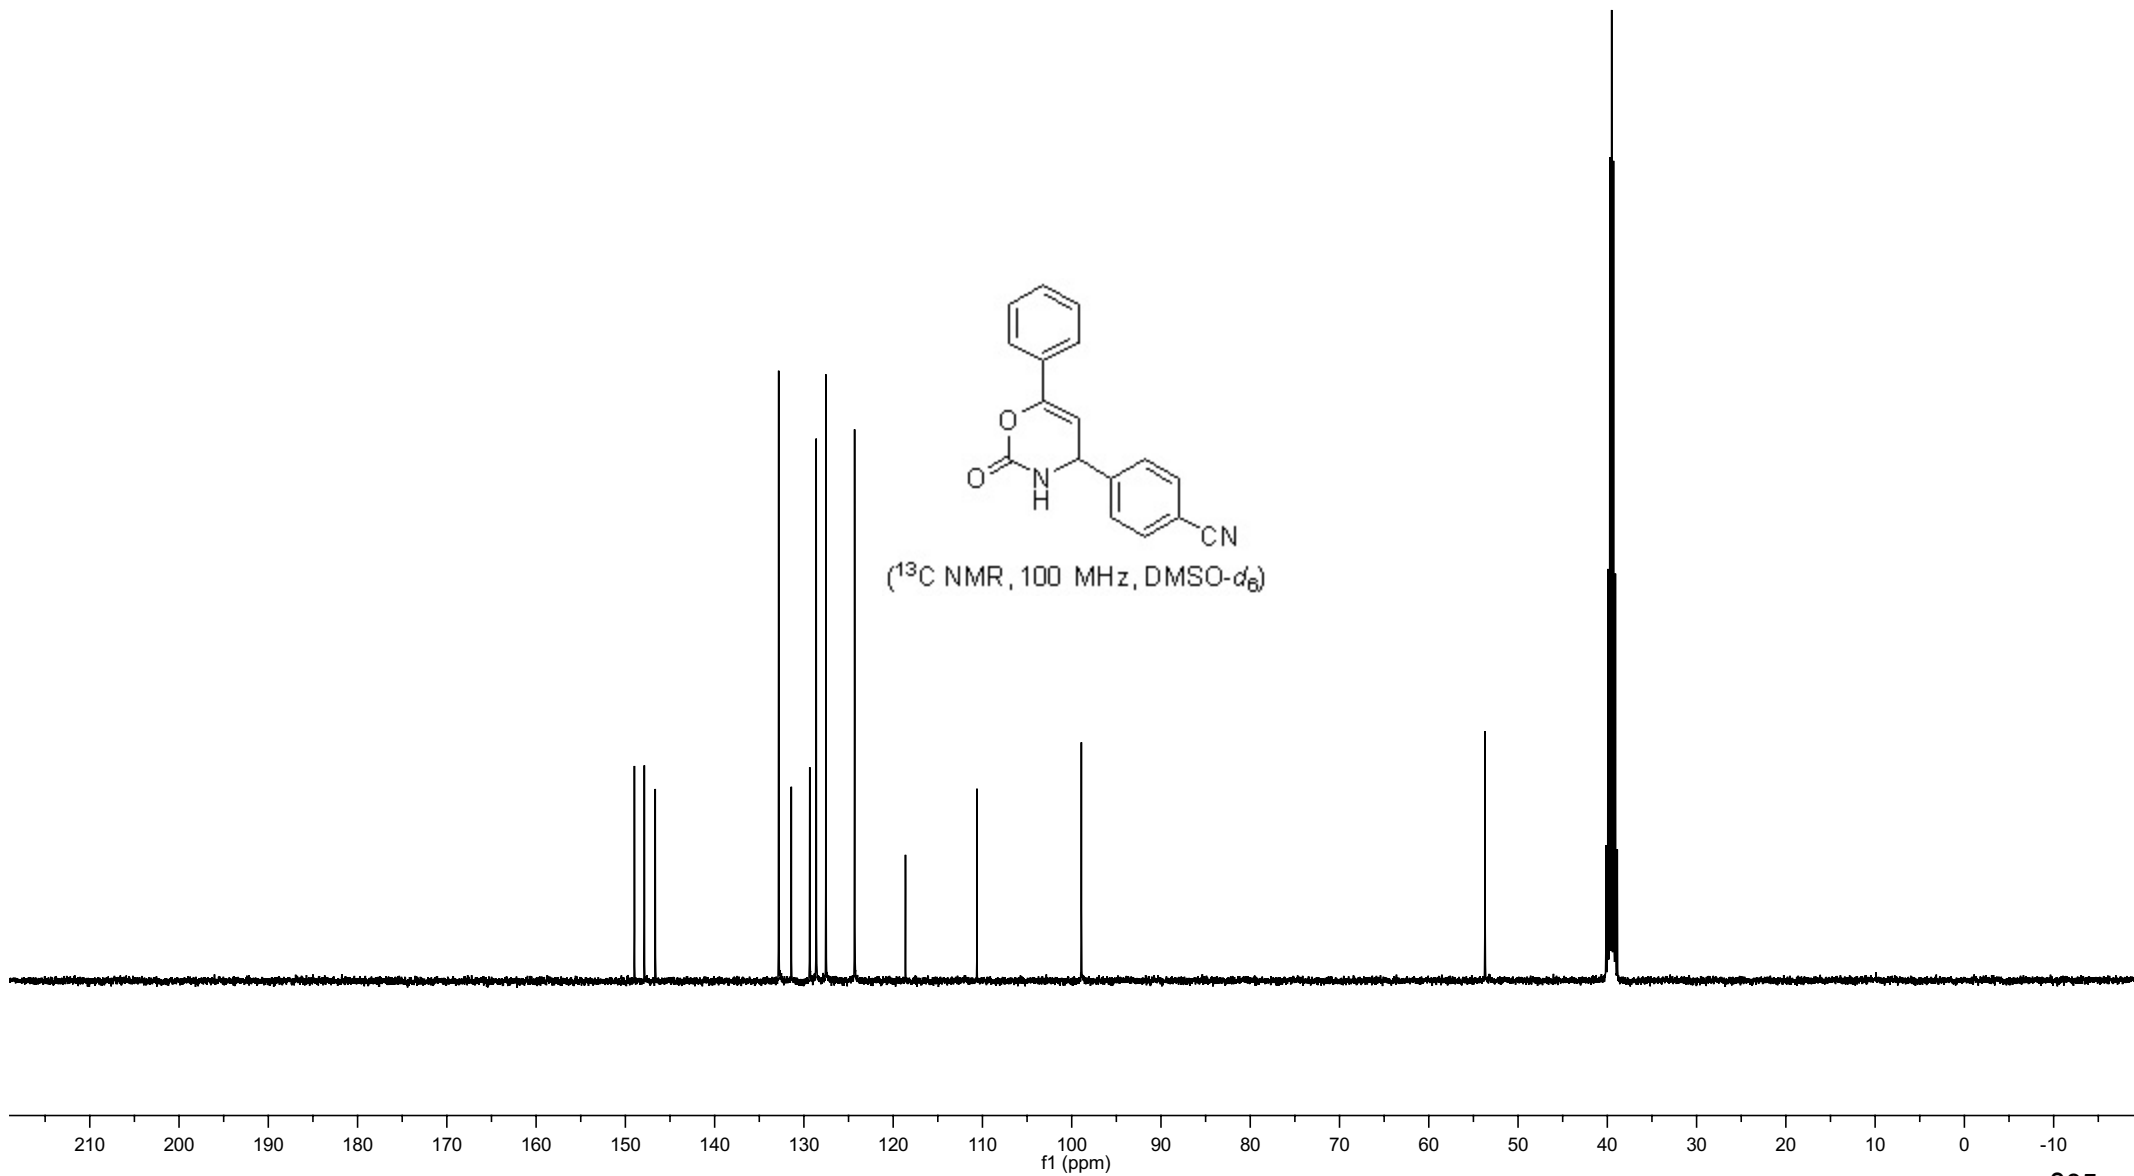

NMR spectra of compound 3ha

8.392

7.677  
7.661  
7.658  
7.651

7.436  
7.417  
7.405  
7.397  
7.379  
7.303  
7.182  
7.141

6.018  
6.015  
6.008  
6.004

5.201  
5.196  
5.191  
5.186

2.329

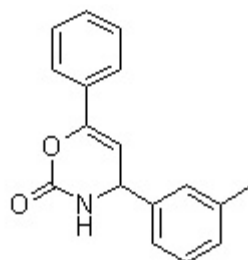

(<sup>1</sup>H NMR, 400 MHz, DMSO-*d*<sub>6</sub>)

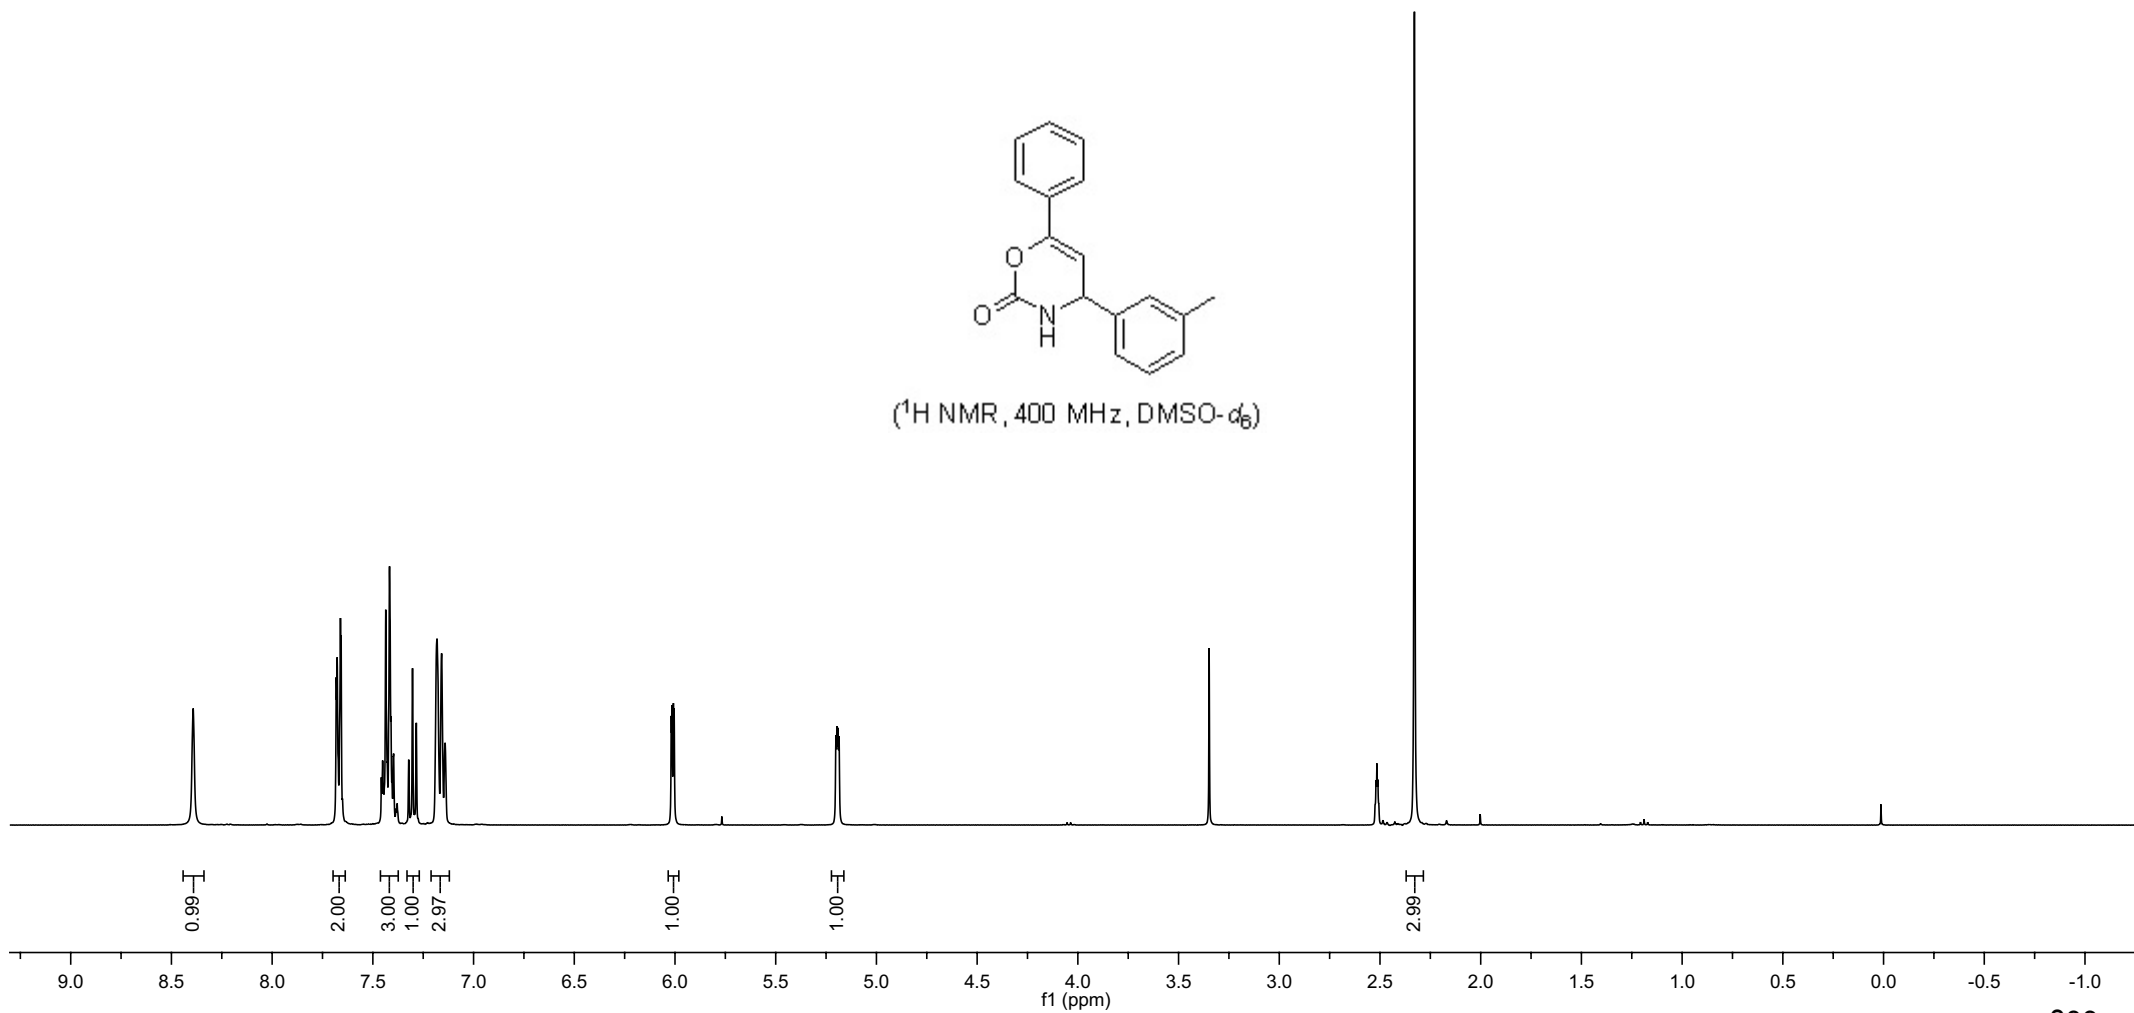

# NMR spectra of compound 3ha

— 149.135  
— 146.012  
— 142.637  
— 137.958  
— 131.644  
— 127.001  
— 124.221  
— 123.650  
— 100.028  
— 54.088  
— 20.990

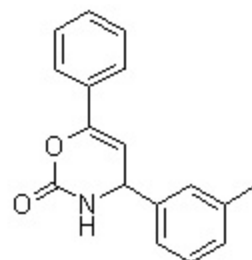

(<sup>13</sup>C NMR, 100 MHz, DMSO-*d*<sub>6</sub>)

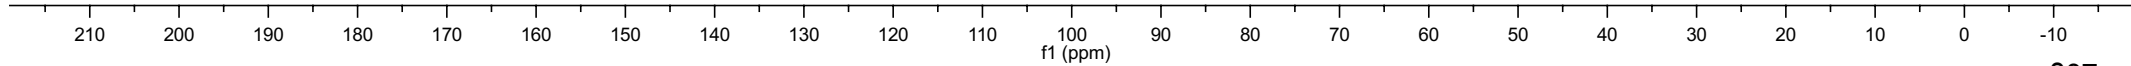

# NMR spectra of compound 3a

8.489

7.682  
7.666  
7.662  
7.655

7.420  
7.402  
7.385  
7.374  
7.371  
7.355  
7.352

6.072  
6.069  
6.062  
6.059

5.301  
5.296  
5.291  
5.286

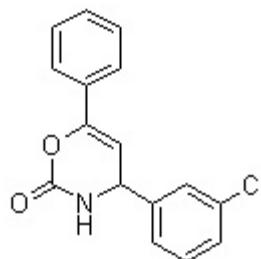

(<sup>1</sup>H NMR, 400 MHz, DMSO-*d*<sub>6</sub>)

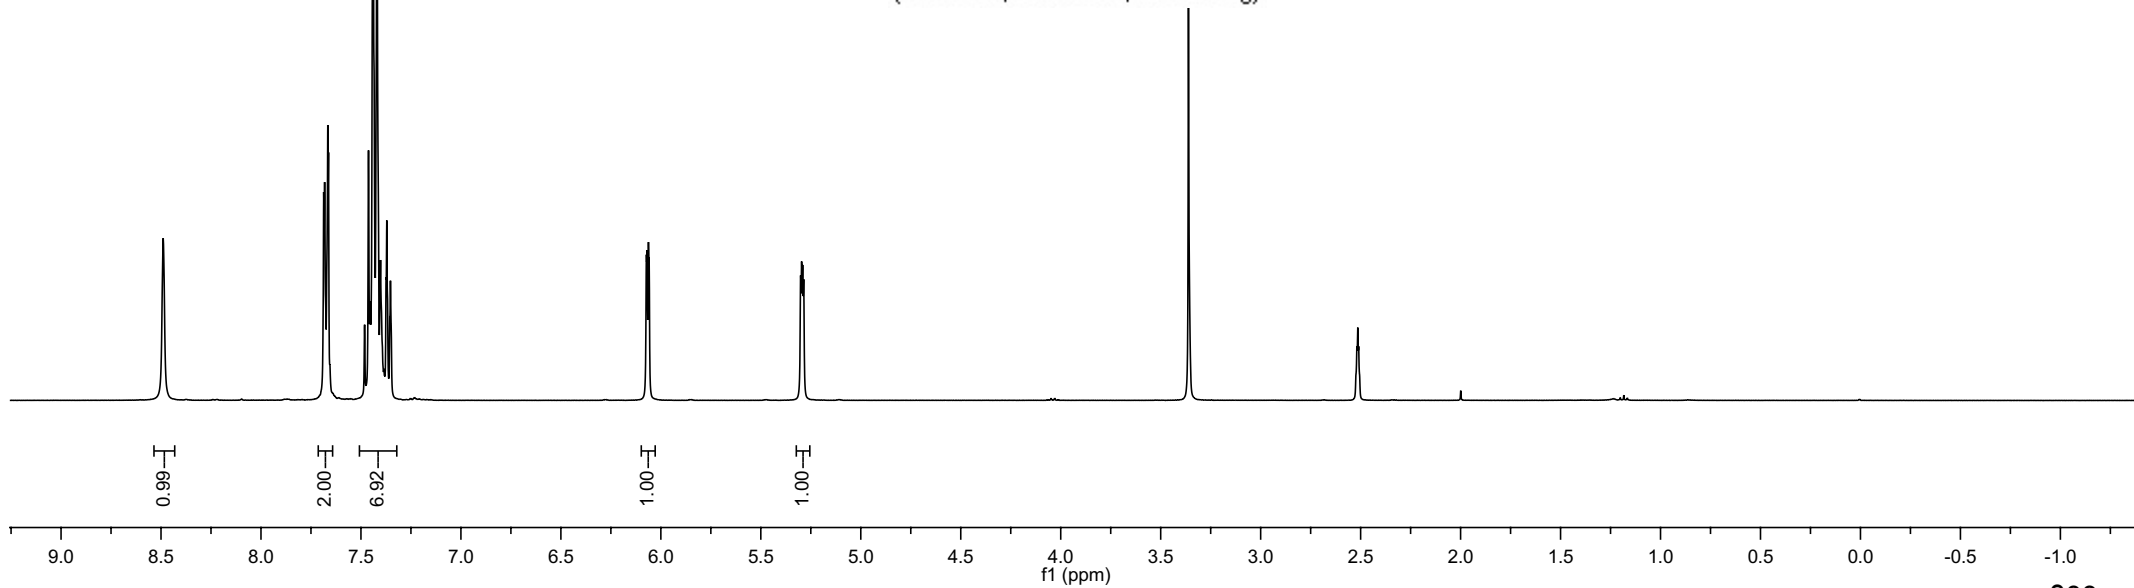



# NMR spectra of compound 3a

149.006  
146.439  
145.066

133.318  
131.479  
130.767  
129.272  
128.616  
127.781  
126.452  
125.189  
124.297

99.313

53.480

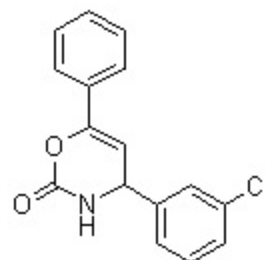

(<sup>13</sup>C NMR, 100 MHz, DMSO-*d*<sub>6</sub>)

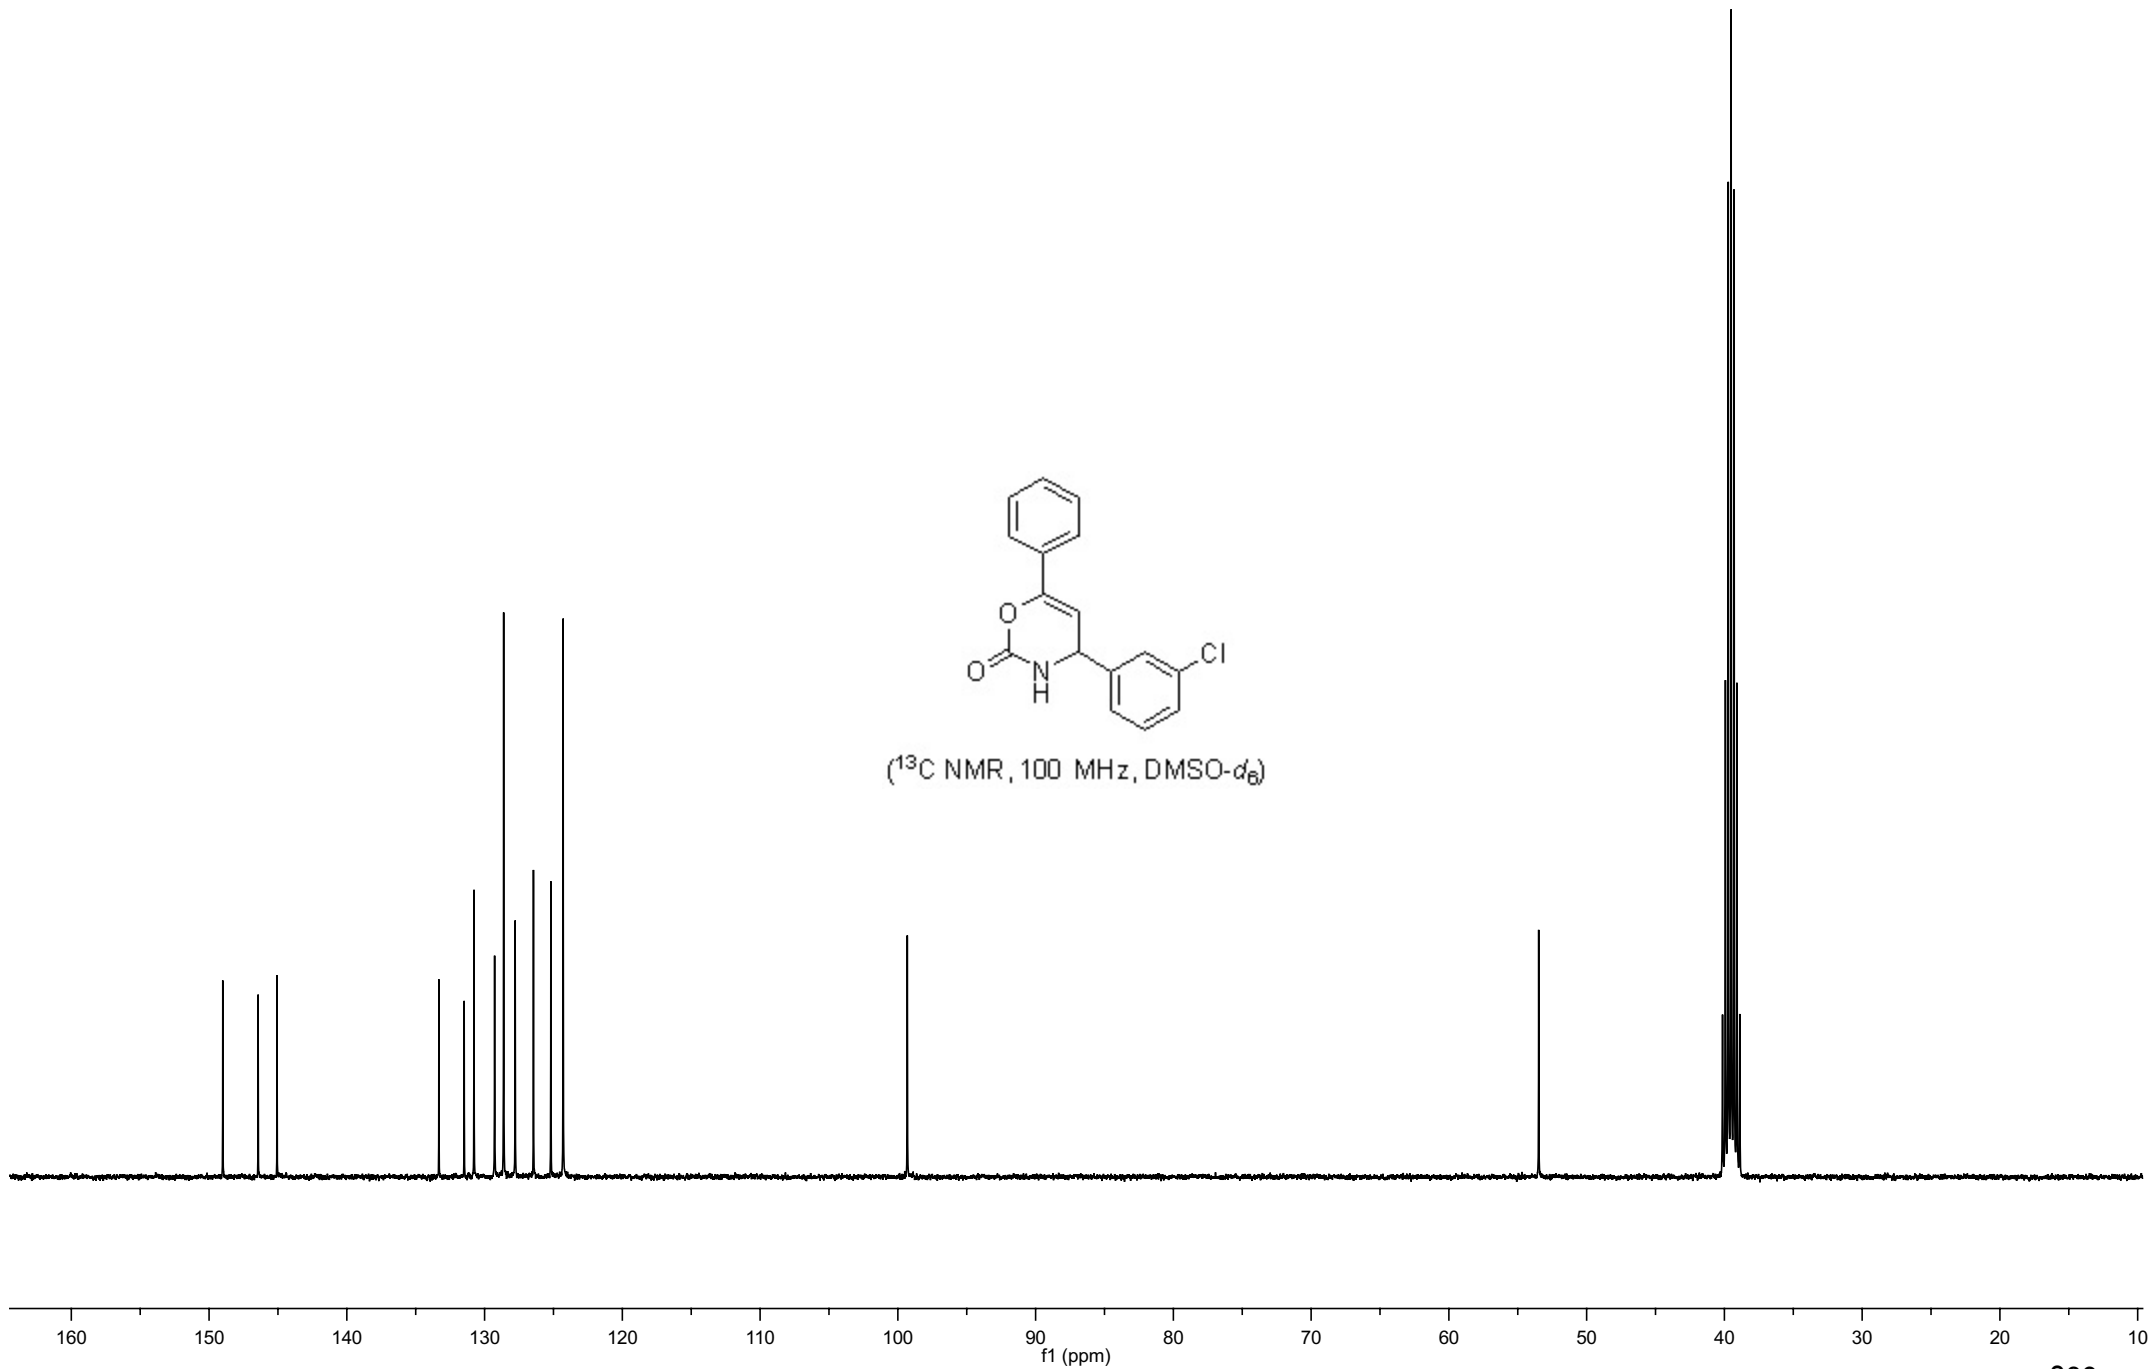

NMR spectra of compound 3ja

8.474  
7.659  
7.537  
7.529  
7.524  
7.455  
7.447  
7.433  
7.414  
7.398  
7.397  
7.391  
7.384

6.065  
6.062  
6.055  
6.052

5.286  
5.280  
5.275  
5.270

3.340

2.512  
2.507  
2.503

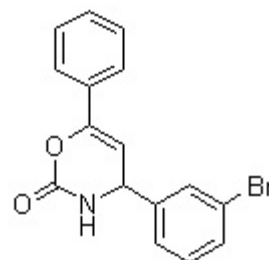

(<sup>1</sup>H NMR, 400 MHz, DMSO-*d*<sub>6</sub>)

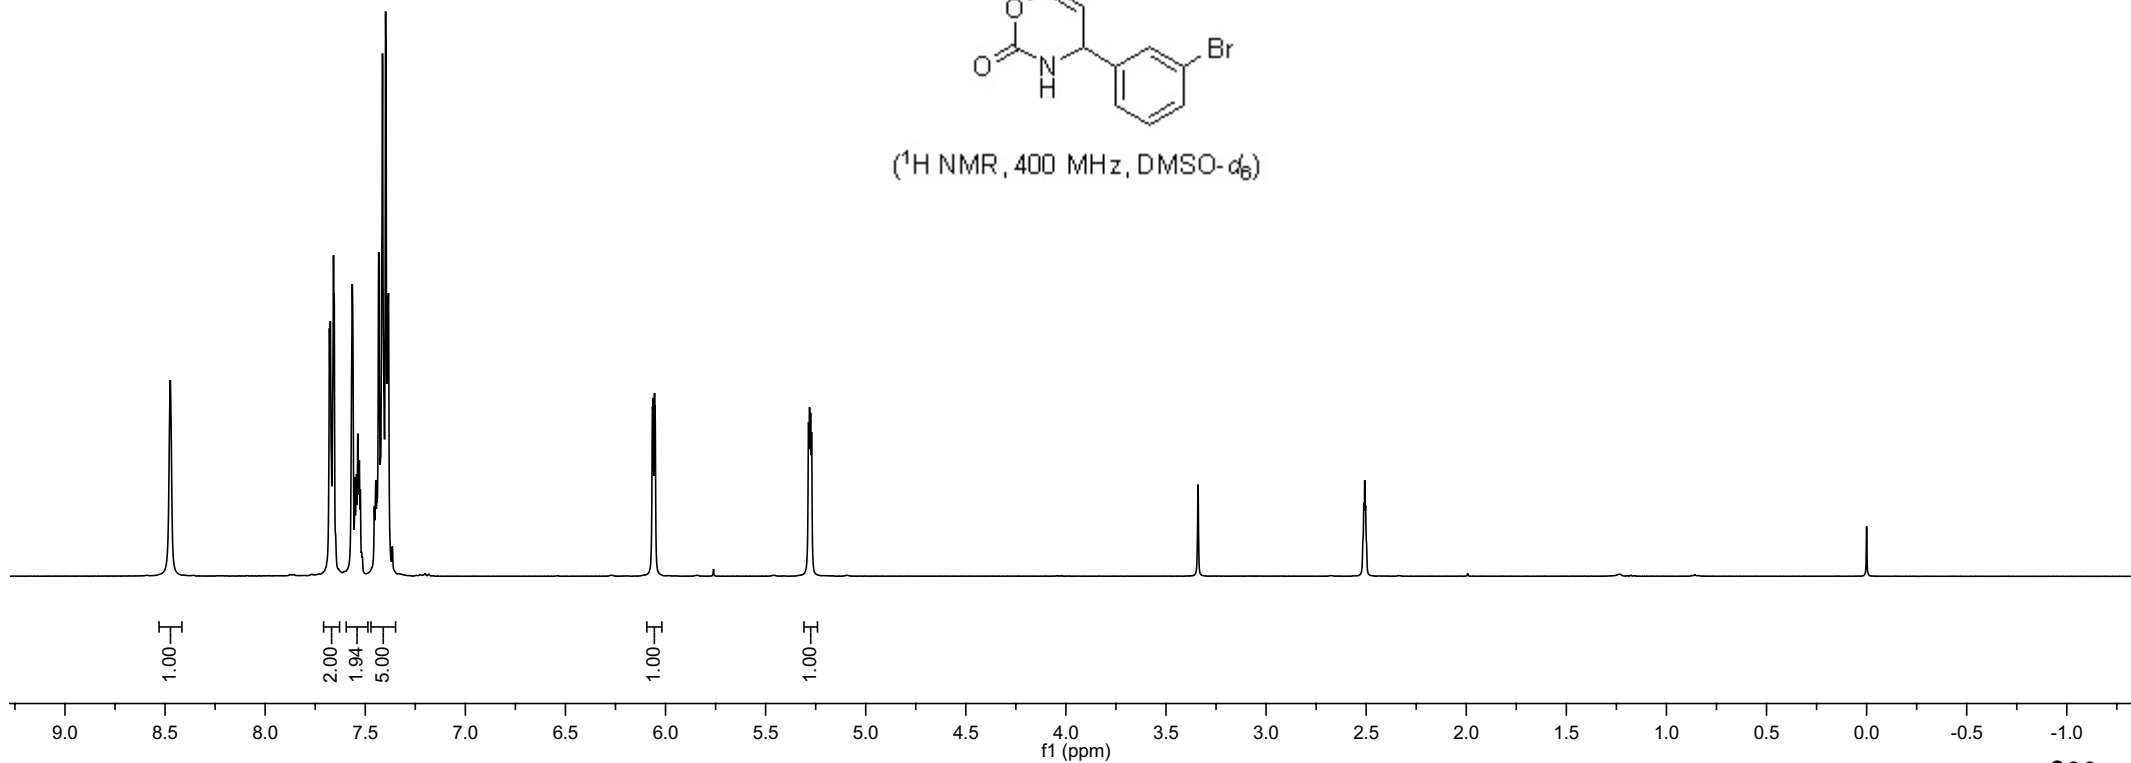

# NMR spectra of compound 3j a

148.988  
146.425  
145.305  
131.069  
130.691  
129.326  
129.275  
128.620  
125.597  
124.298  
121.904

99.334

53.439

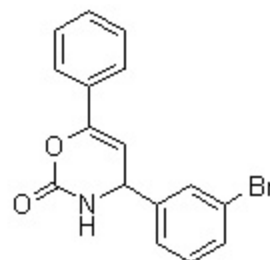

(<sup>13</sup>C NMR, 100 MHz, DMSO-*d*<sub>6</sub>)

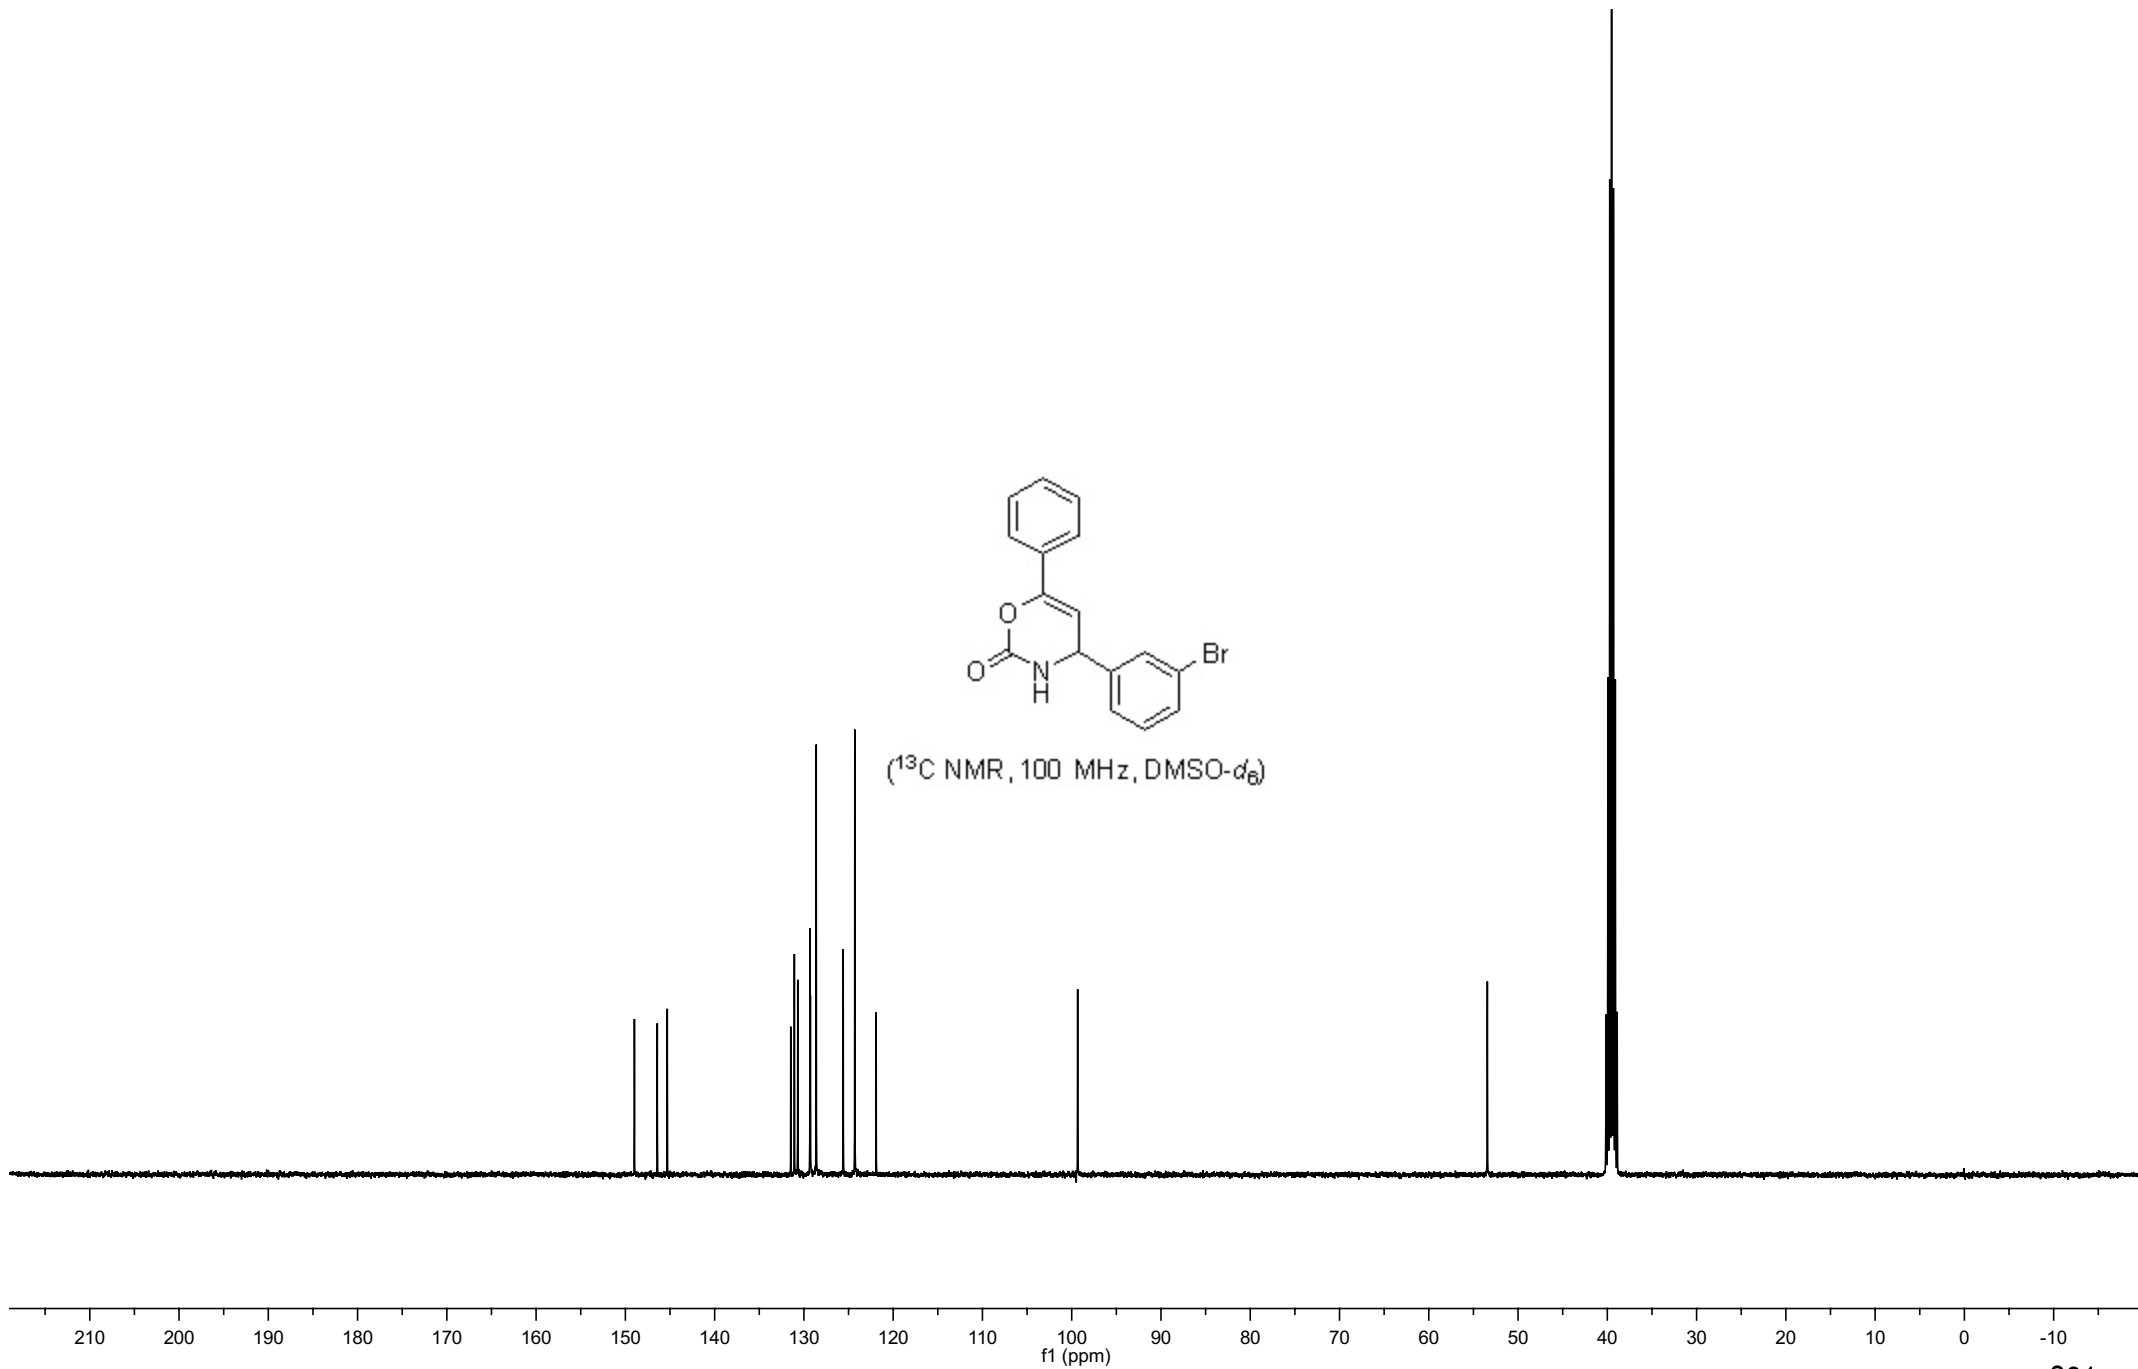

NMR spectra of compound 3ka

8.286

7.679  
7.675  
7.659  
7.606  
7.380  
7.366  
7.300  
7.270  
7.249  
7.236  
7.217  
7.204

5.995  
5.992  
5.985  
5.982

5.449  
5.444  
5.439  
5.435

2.411

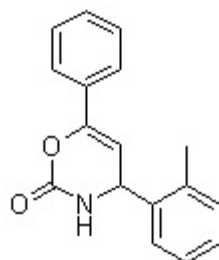

(<sup>1</sup>H NMR, 400 MHz, DMSO-*d*<sub>6</sub>)

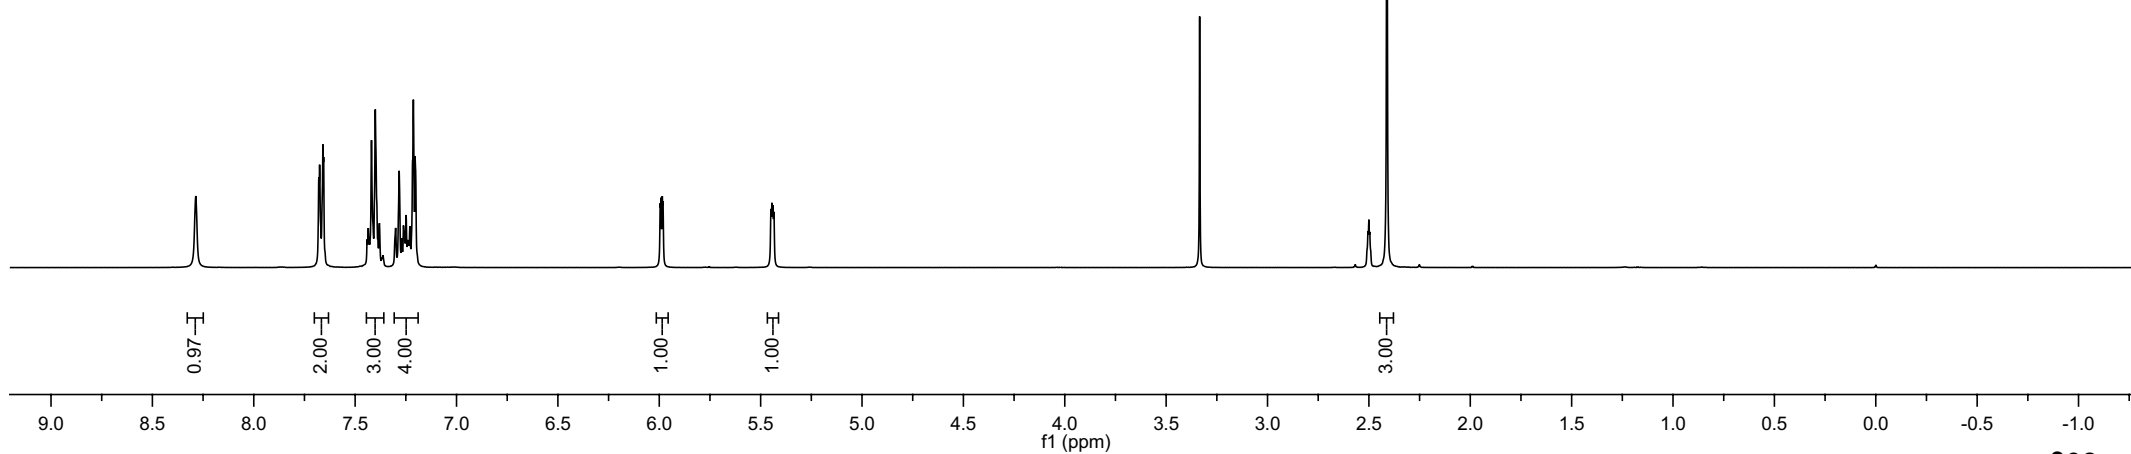

NMR spectra of compound 3ka

— 149.381  
— 146.254  
— 140.332  
— 134.838  
— 131.663  
— 130.658  
— 129.103  
— 128.563  
— 127.633  
— 126.567  
— 124.207

— 99.140

— 51.296

— 18.487

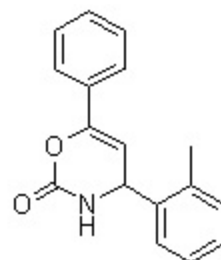

(<sup>13</sup>C NMR, 100 MHz, DMSO-*d*<sub>6</sub>)

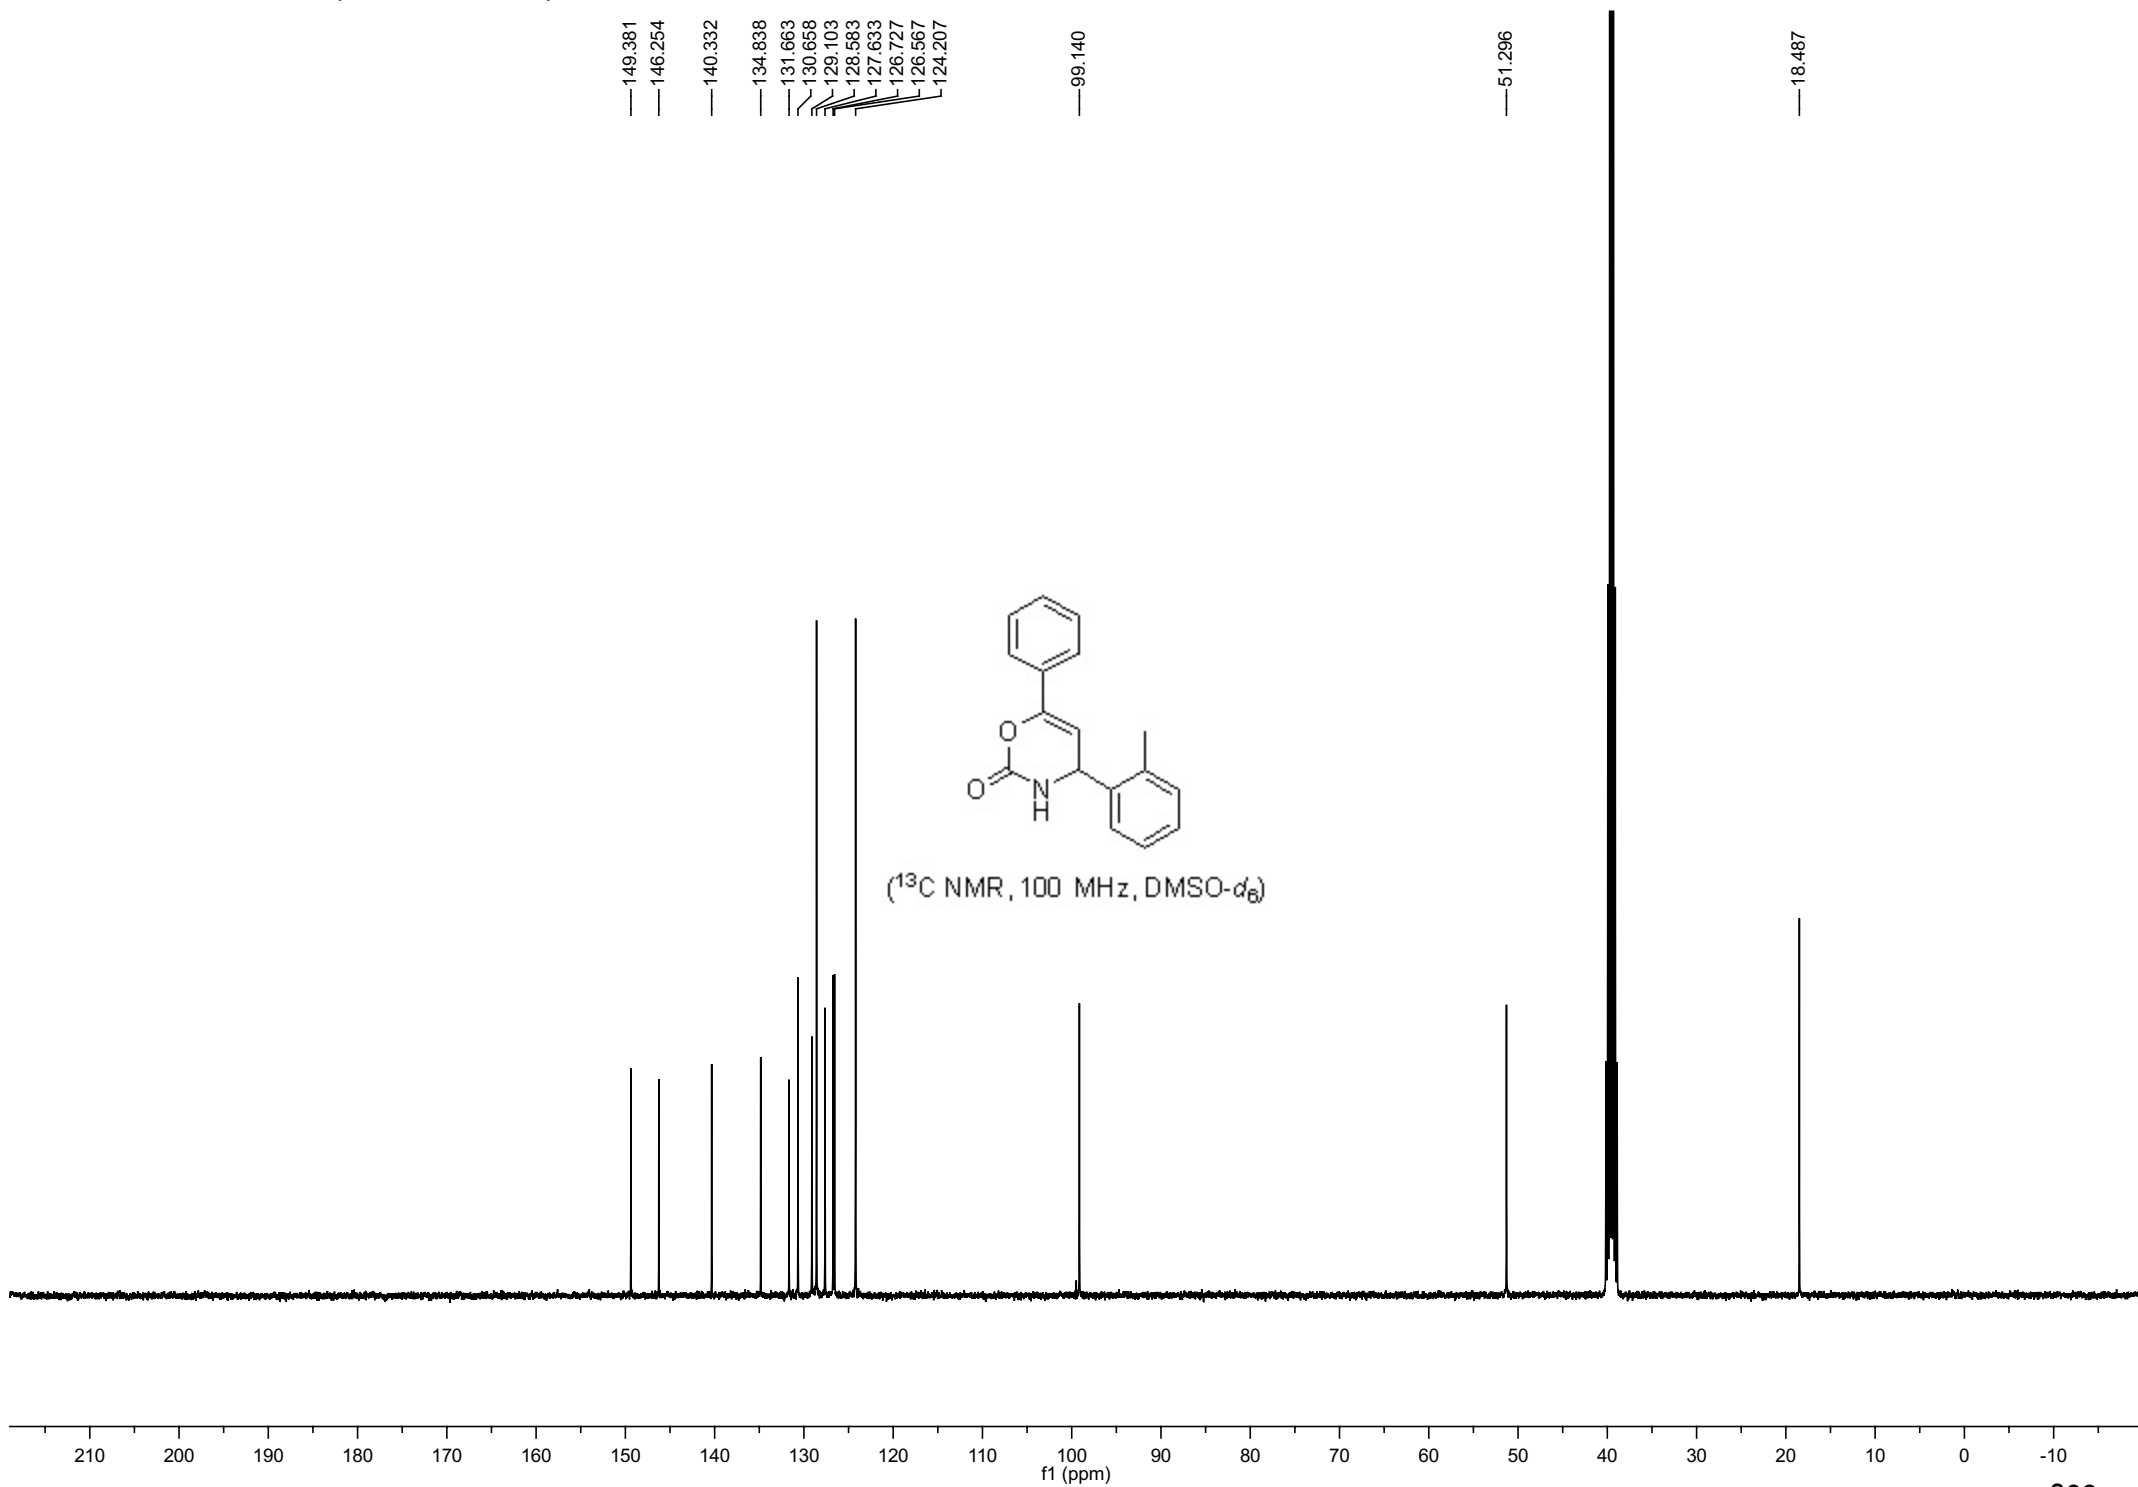

NMR spectra of compound 31a

7.667  
7.661  
7.657  
7.651  
7.647  
7.643  
7.405  
7.396  
7.391  
7.383  
7.367  
7.364  
7.355  
7.350

5.637  
5.633  
5.628  
5.624

3.456  
3.453  
3.448  
3.444  
3.434  
3.431  
3.426  
3.422

1.135  
1.123  
1.115  
1.103  
1.091  
1.081  
1.069  
1.061  
1.049  
0.632  
0.610  
0.570  
0.429  
0.418  
0.405  
0.394  
0.389  
0.383  
0.377  
0.371  
0.369  
0.365  
0.360  
0.348  
0.335  
0.323

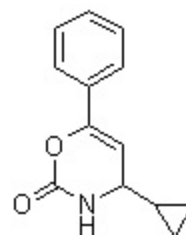

(<sup>1</sup>H NMR, 400 MHz, CDCl<sub>3</sub>)

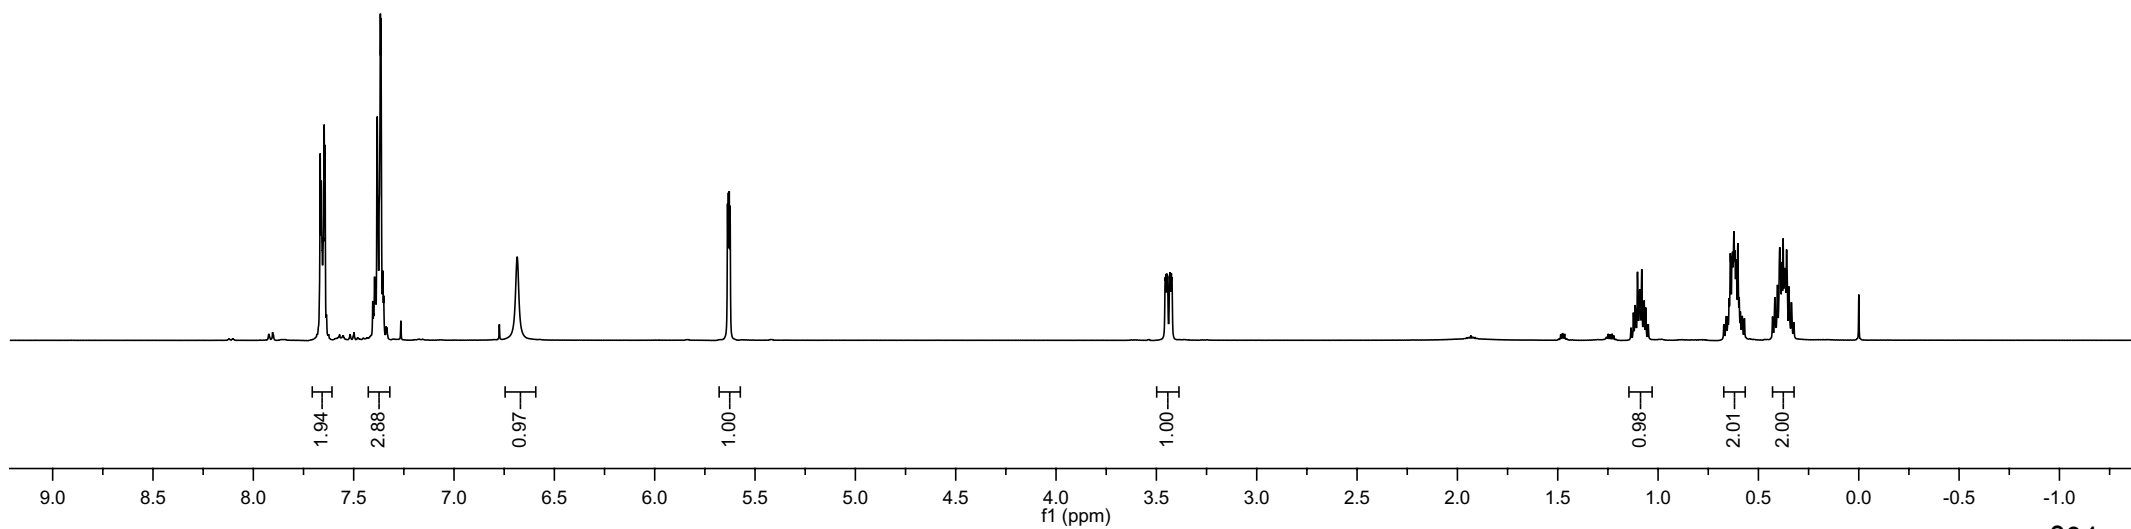

# NMR spectra of compound 31a

— 149.186  
— 145.992

— 129.845  
— 126.515  
— 122.783

— 96.328

— 54.469

— 16.312

— 0.984  
— -0.003

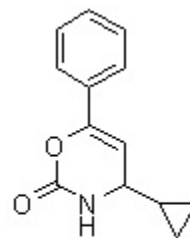

(<sup>13</sup>C NMR, 100 MHz, CDCl<sub>3</sub>)

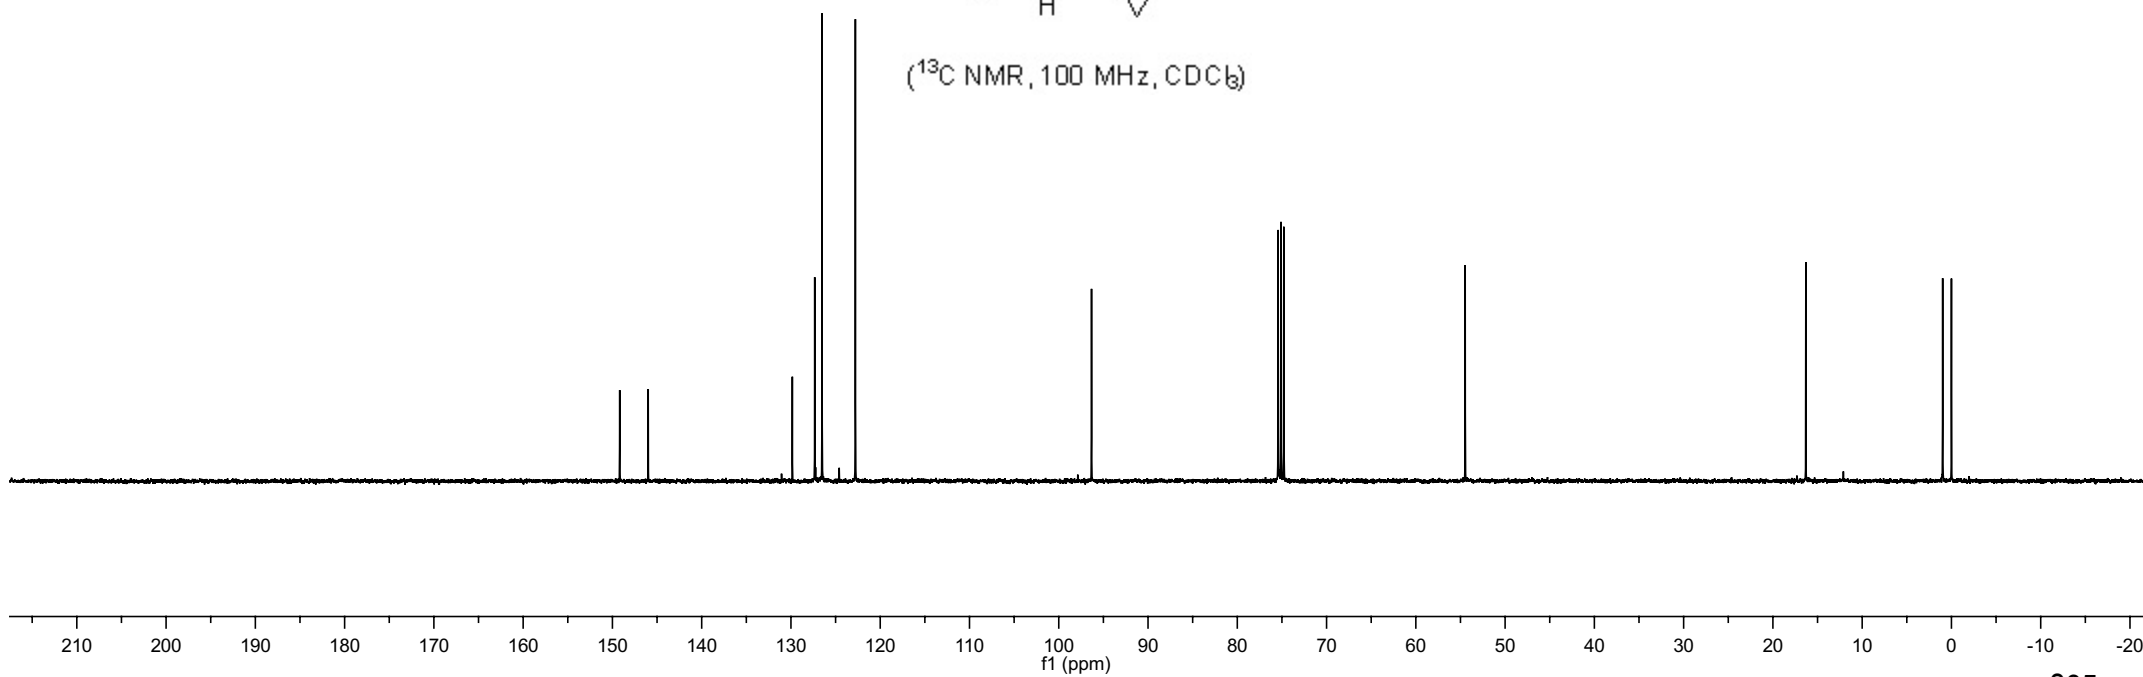

NMR spectra of compound 3ma

7.651  
7.646  
7.642  
7.635  
7.631  
7.627  
7.620

7.392  
7.368  
7.349  
7.329

6.641

5.539  
5.534  
5.529  
5.524

4.026  
4.021  
4.016  
4.011  
4.006  
4.001

1.814  
1.807  
1.783  
1.703  
1.672

1.477

1.306  
1.299  
1.289  
1.274  
1.266  
1.257  
1.242  
1.235  
1.219  
1.210  
1.203  
1.181  
1.173  
1.158  
1.149  
1.142  
1.124  
1.118  
1.109  
1.098  
1.094  
1.086  
1.078  
1.069  
1.063  
1.054

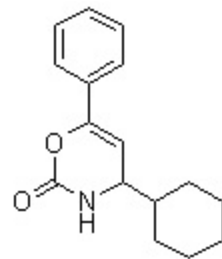

(<sup>1</sup>H NMR, 400 MHz, CDCl<sub>3</sub>)

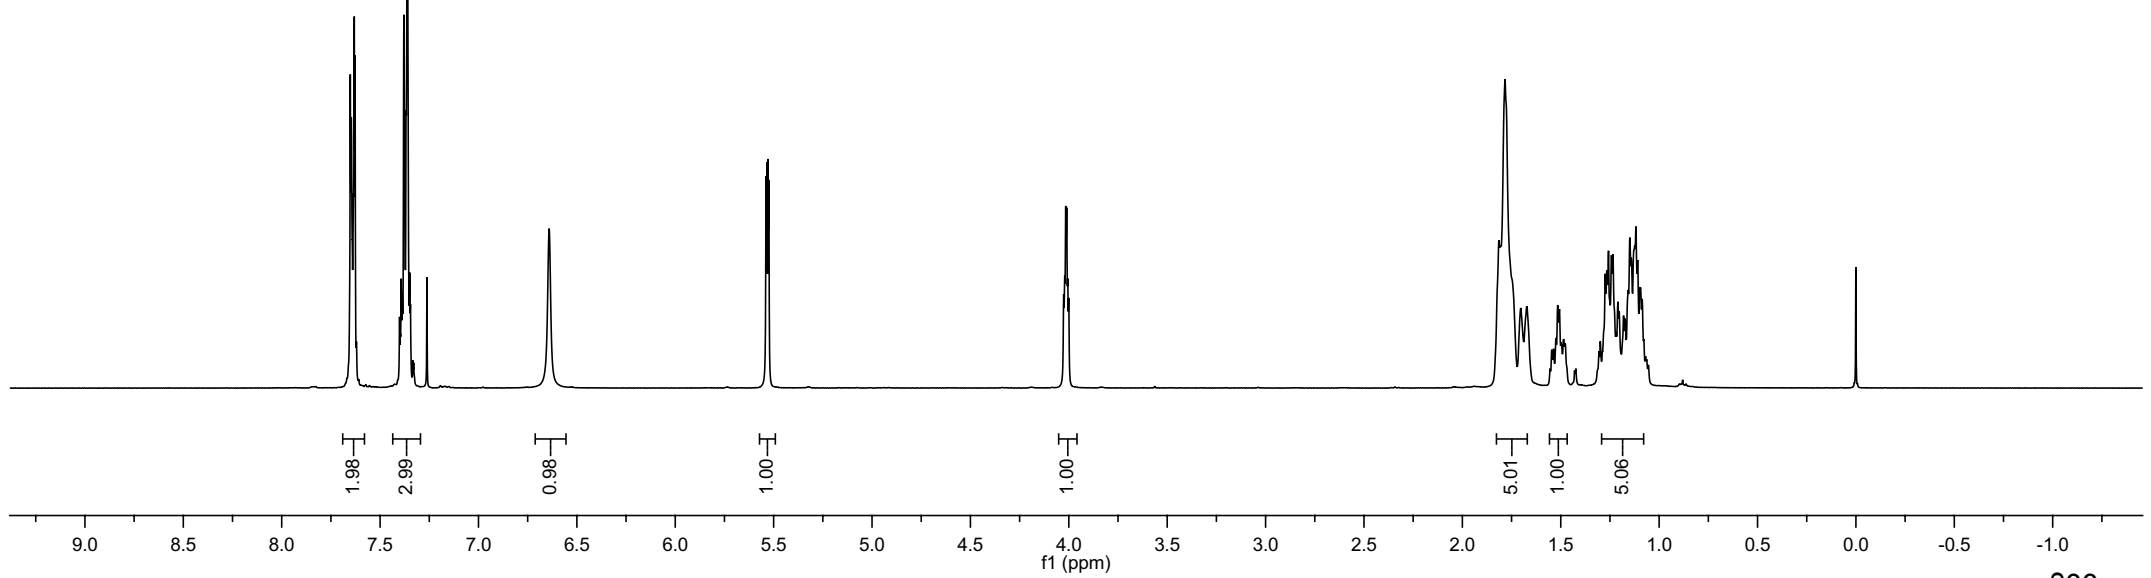



# NMR spectra of compound 3ma

—151.977  
—148.726

—131.871  
—128.465  
—124.661

—97.340

—56.235

—44.735

↙27.982  
↘27.604  
↙26.247  
↘25.986

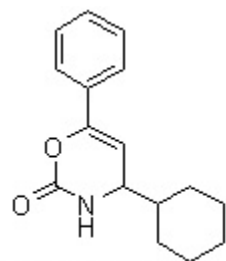

(<sup>13</sup>C NMR, 100 MHz, CDCl<sub>3</sub>)

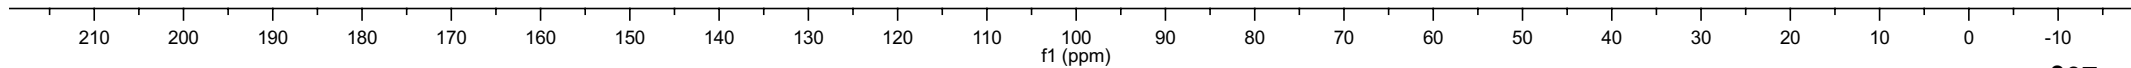

NMR spectra of compound 3na

7.646  
7.641  
7.636  
7.630  
7.622  
7.379  
7.378  
7.361  
— 6.996

5.547  
5.543  
5.538  
5.534

4.213  
4.200

1.674  
1.660  
1.658  
1.646  
1.643  
1.639  
1.634  
1.620

1.474  
1.454  
1.417

0.985  
0.967  
0.949

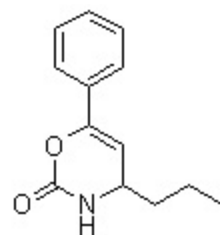

(<sup>1</sup>H NMR, 400 MHz, CDCl<sub>3</sub>)

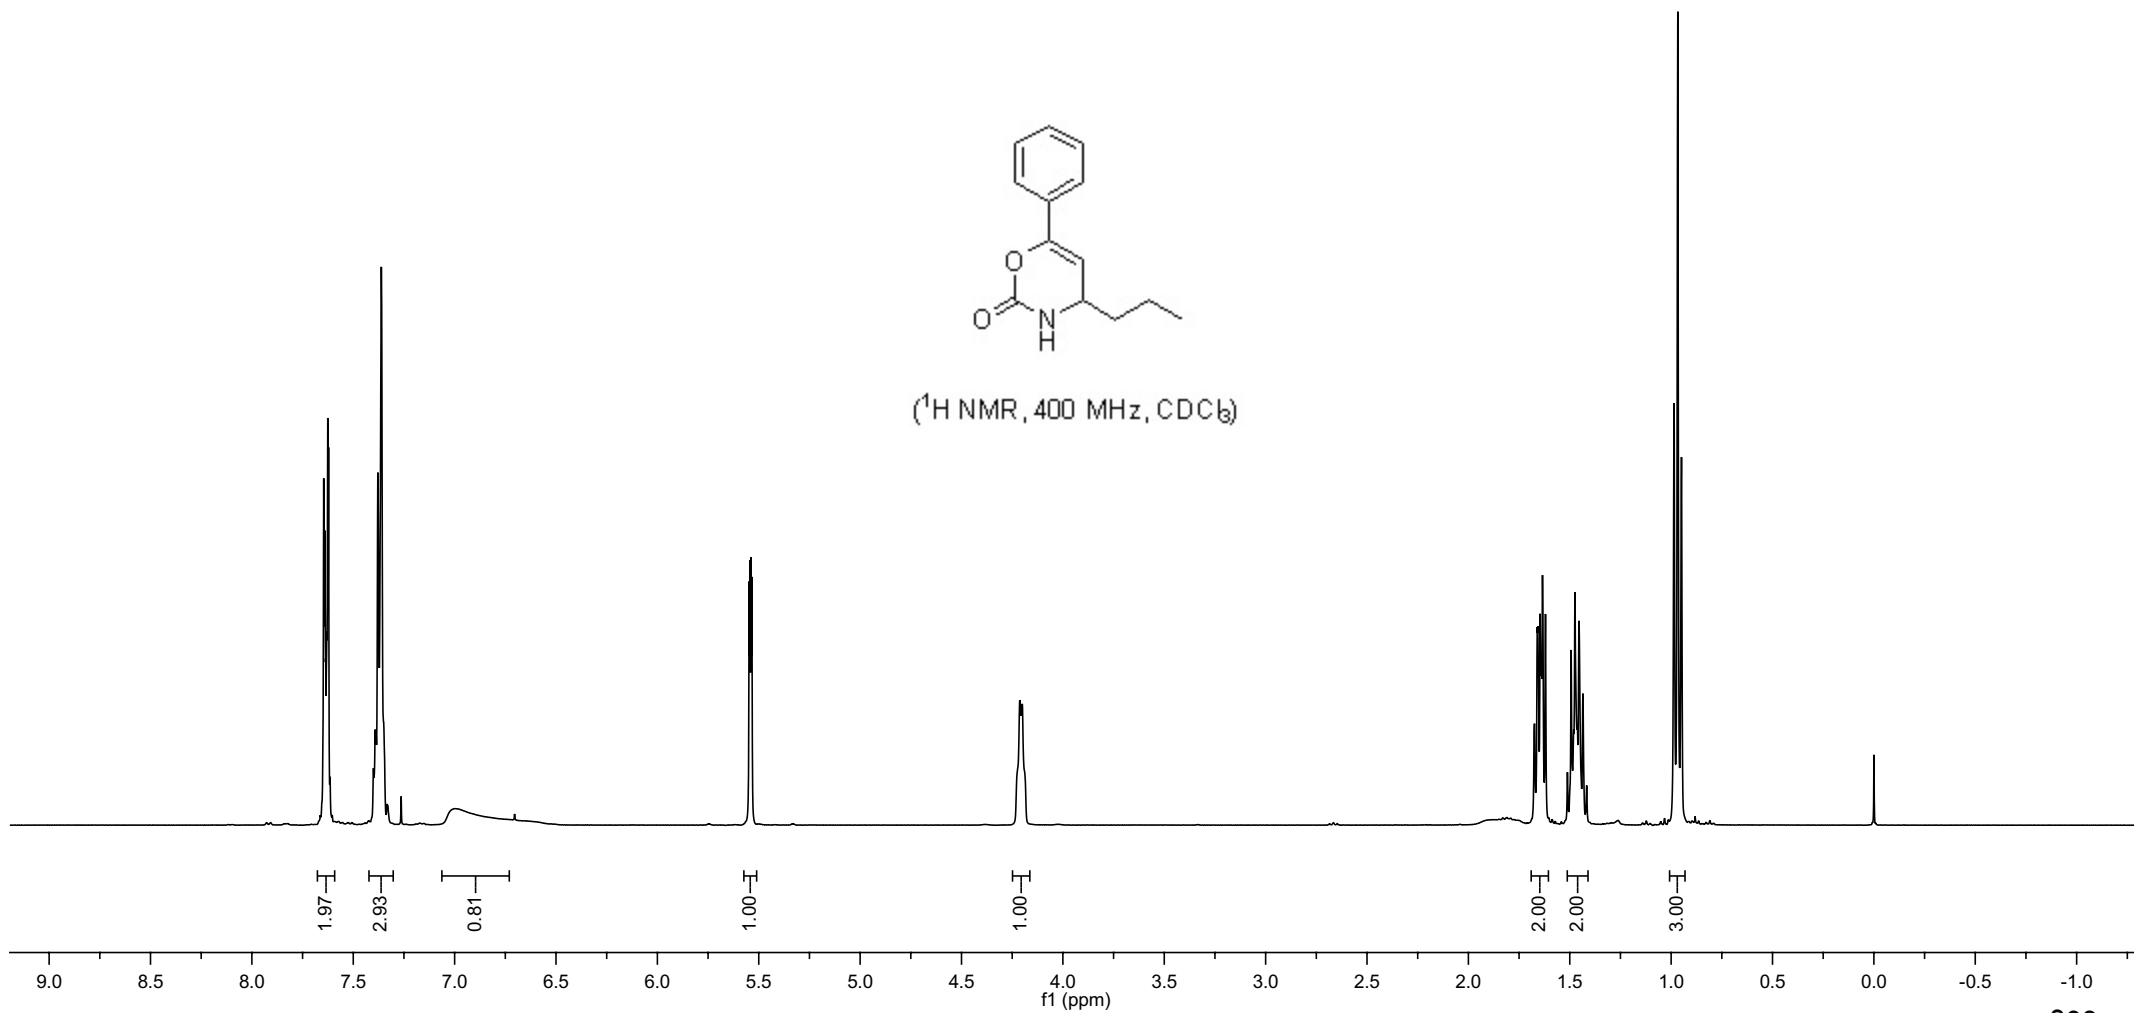

NMR spectra of compound 3na

— 151.886  
— 148.084  
  
— 131.831  
— 128.470  
— 124.644  
  
— 98.933  
  
— 51.138  
— 40.074  
  
— 17.678  
— 13.860

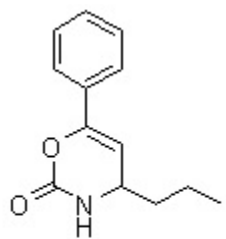

(<sup>13</sup>C NMR, 100 MHz, CDCl<sub>3</sub>)

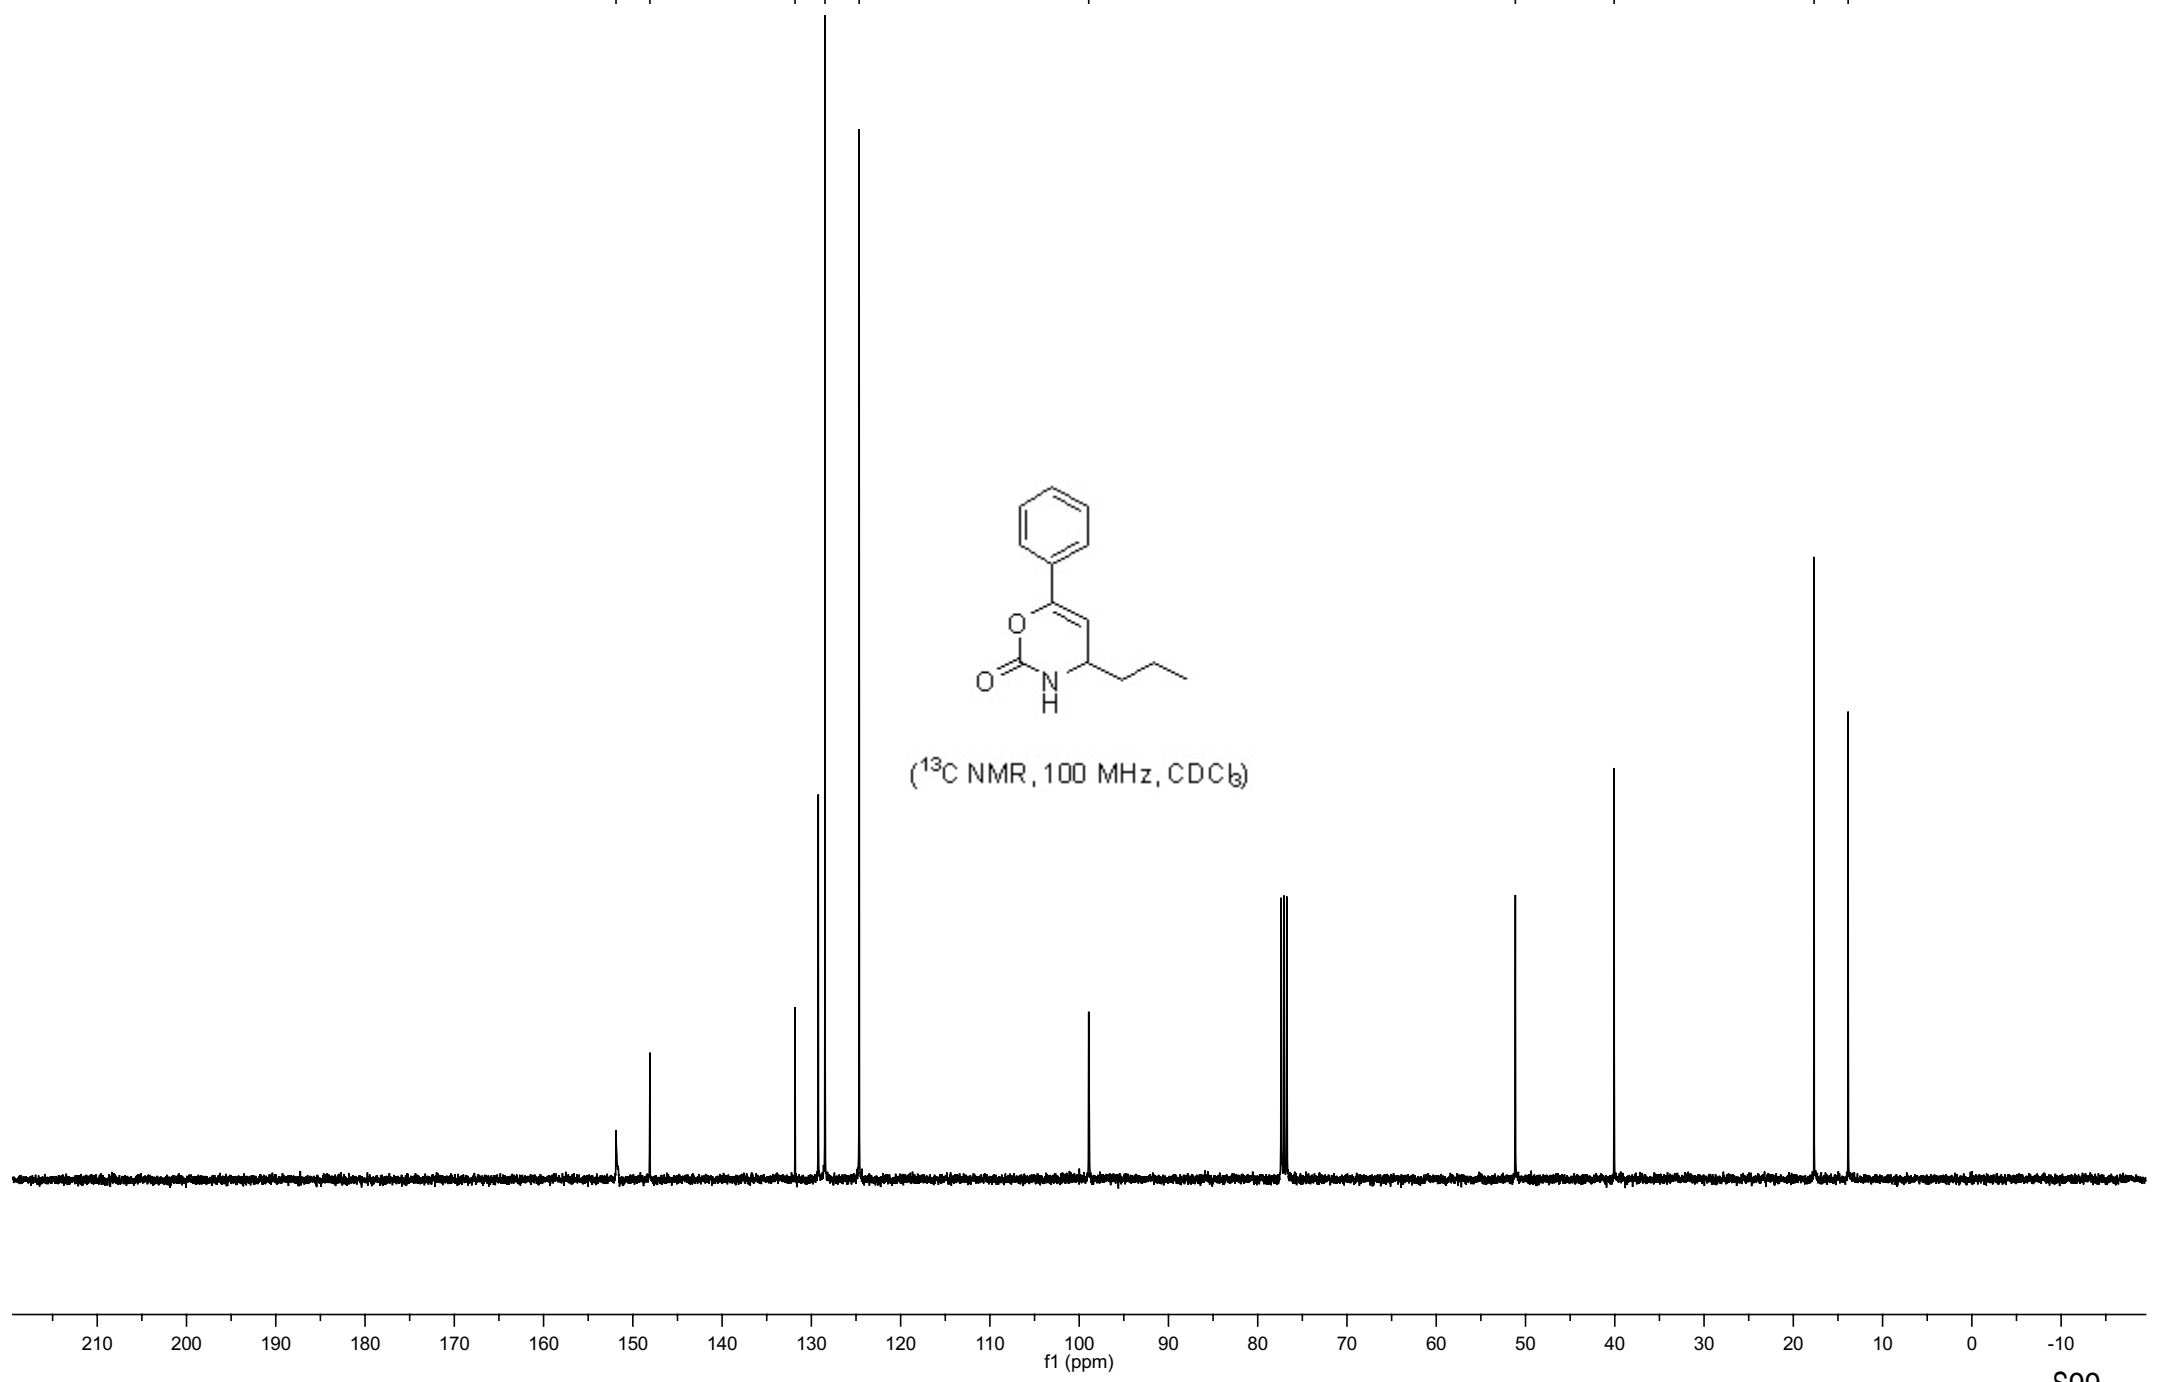

NMR spectra of compound 30a

7.654  
7.649  
7.644  
7.638  
7.634  
7.630  
7.385  
7.369  
7.366  
7.358  
7.353

6.621

5.520  
5.516  
5.511  
5.506

4.070  
4.065  
4.060  
4.055  
4.050  
4.045

1.904  
1.893  
1.887  
1.876  
1.870  
1.859  
1.852  
1.842  
1.835  
1.825

1.019  
1.001  
0.983

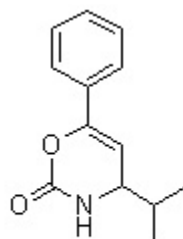

(<sup>1</sup>H NMR, 400 MHz, CDCl<sub>3</sub>)

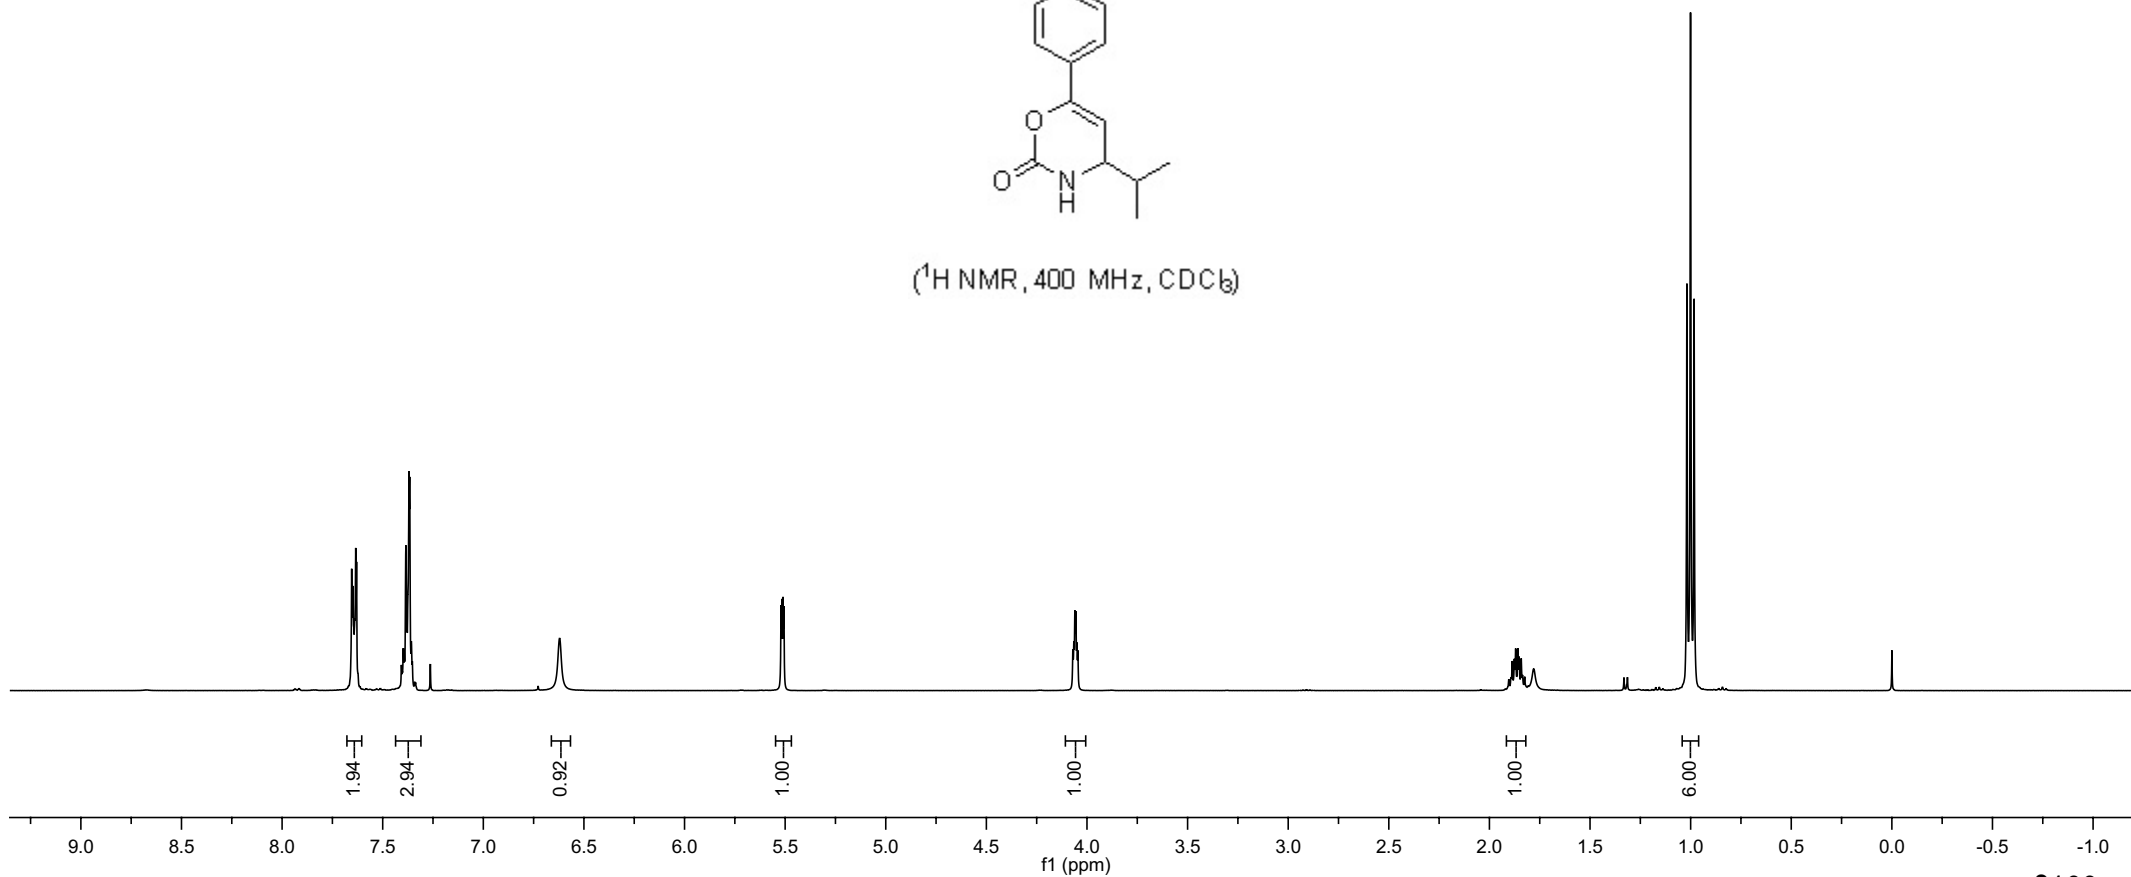

NMR spectra of compound 30a

— 151.945  
— 148.971

— 131.827  
— 128.478  
— 124.680

— 96.849

— 56.808

— 34.604

— 17.313  
— 17.055

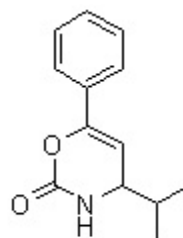

(<sup>13</sup>C NMR, 100 MHz, CDCl<sub>3</sub>)

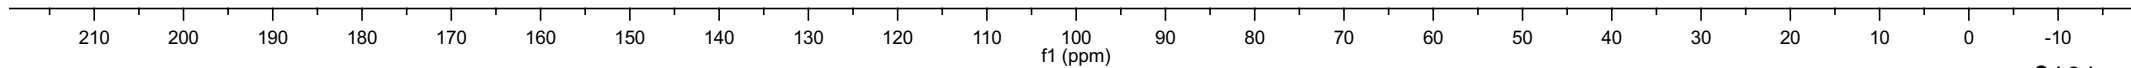

NMR spectra of compound 3pa

7.645  
7.640  
7.625  
7.621

7.383  
7.367  
7.364  
7.355  
7.351

6.509

5.568  
5.564  
5.559  
5.555

4.255  
4.251  
4.246  
4.235  
4.230  
4.226  
4.217  
4.213  
4.208

1.881  
1.864  
1.848  
1.831  
1.814  
1.797  
1.780

1.577  
1.538  
1.485

0.982  
0.979  
0.966  
0.962

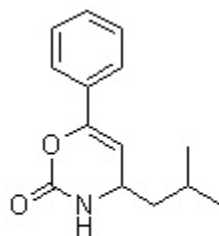

(<sup>1</sup>H NMR, 400 MHz, CDCl<sub>3</sub>)

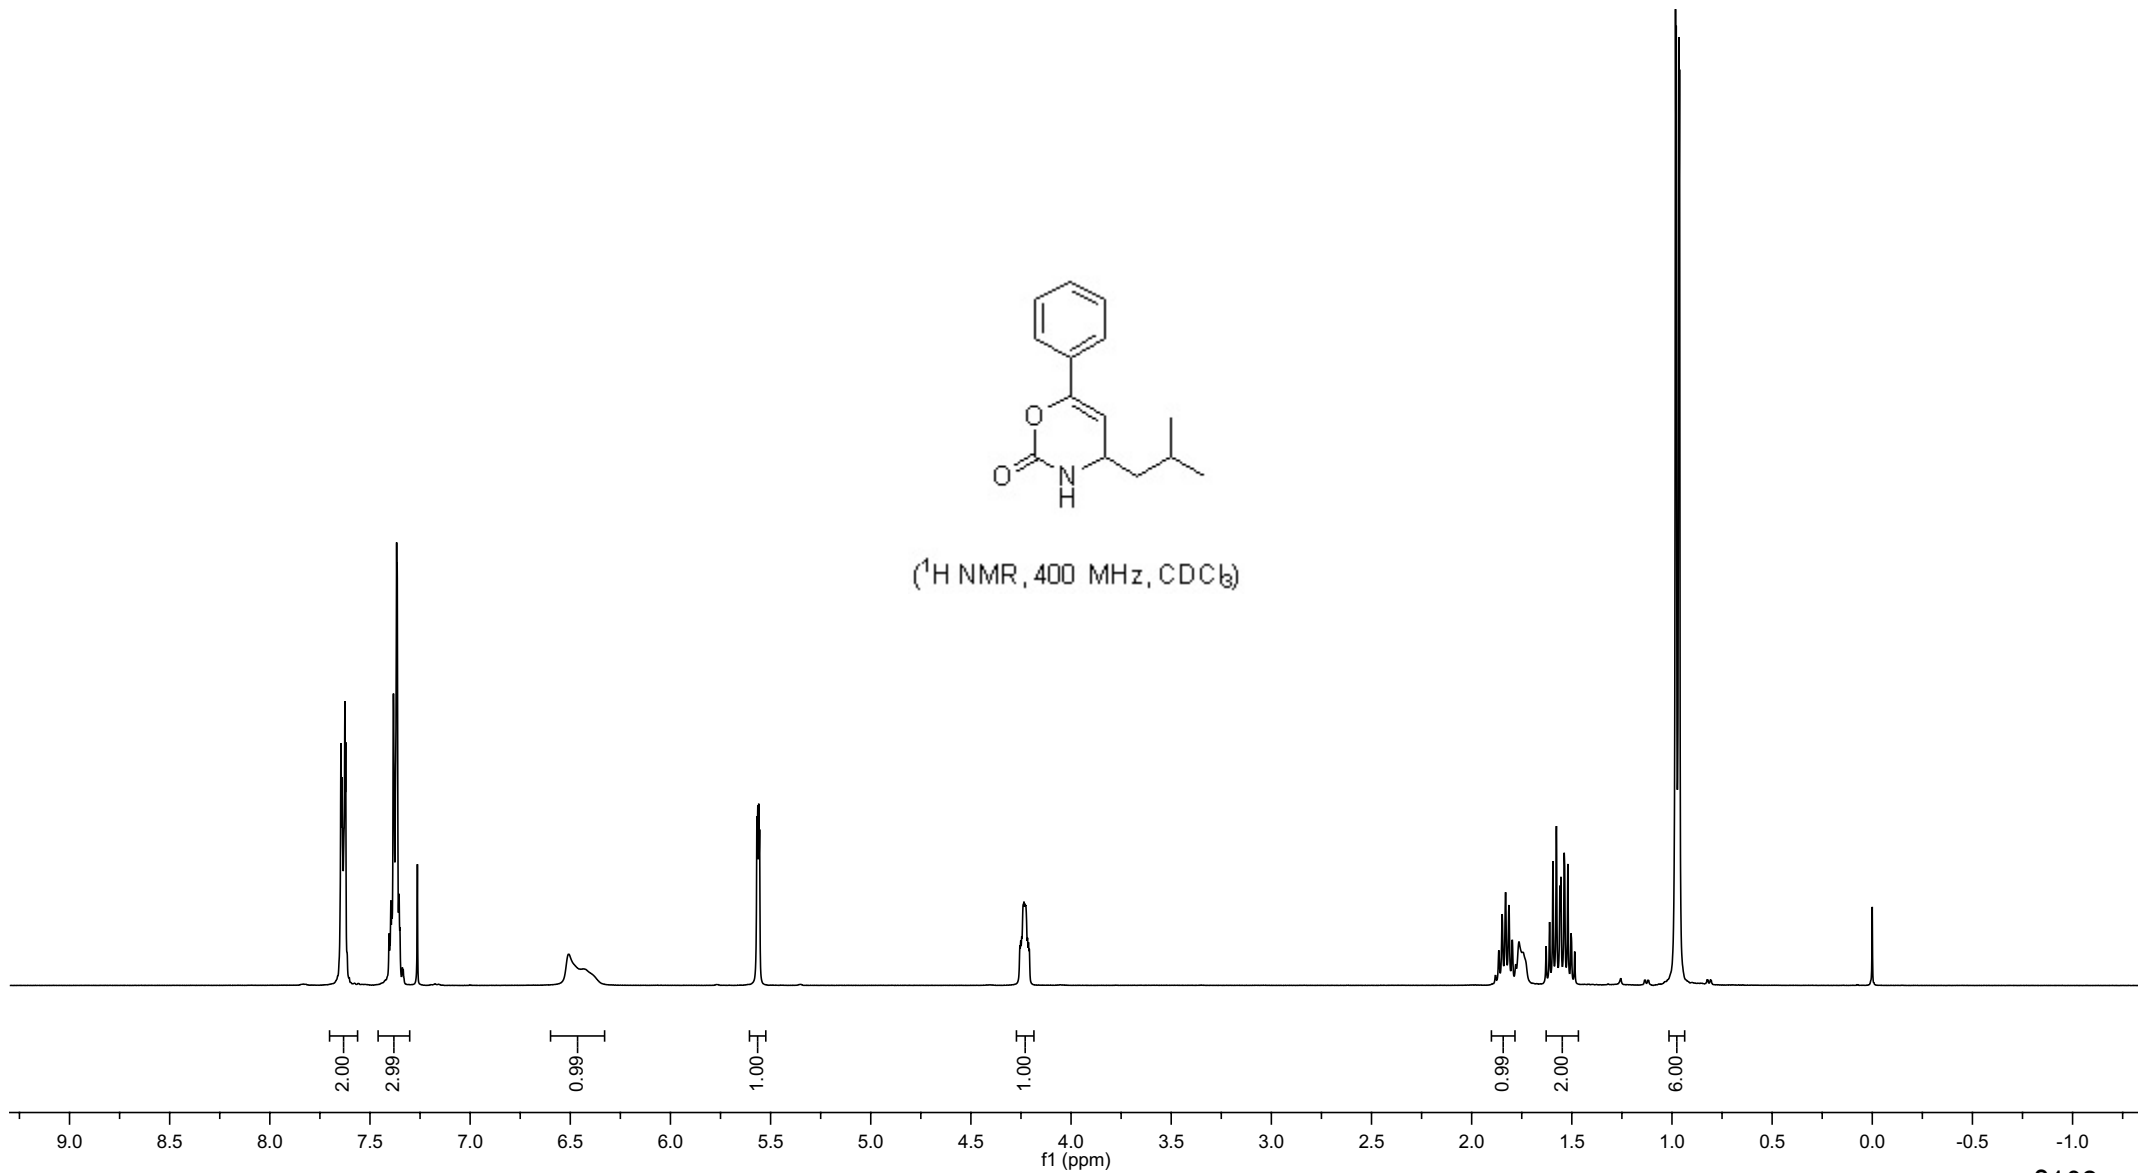

# NMR spectra of compound 3pa

151.442  
151.387  
147.954

131.845  
128.484  
124.668

99.129

49.509  
47.341

23.966  
22.810  
22.456

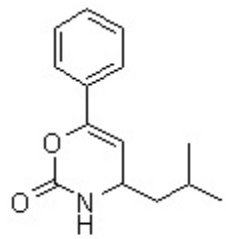

(<sup>13</sup>C NMR, 100 MHz, CDCl<sub>3</sub>)

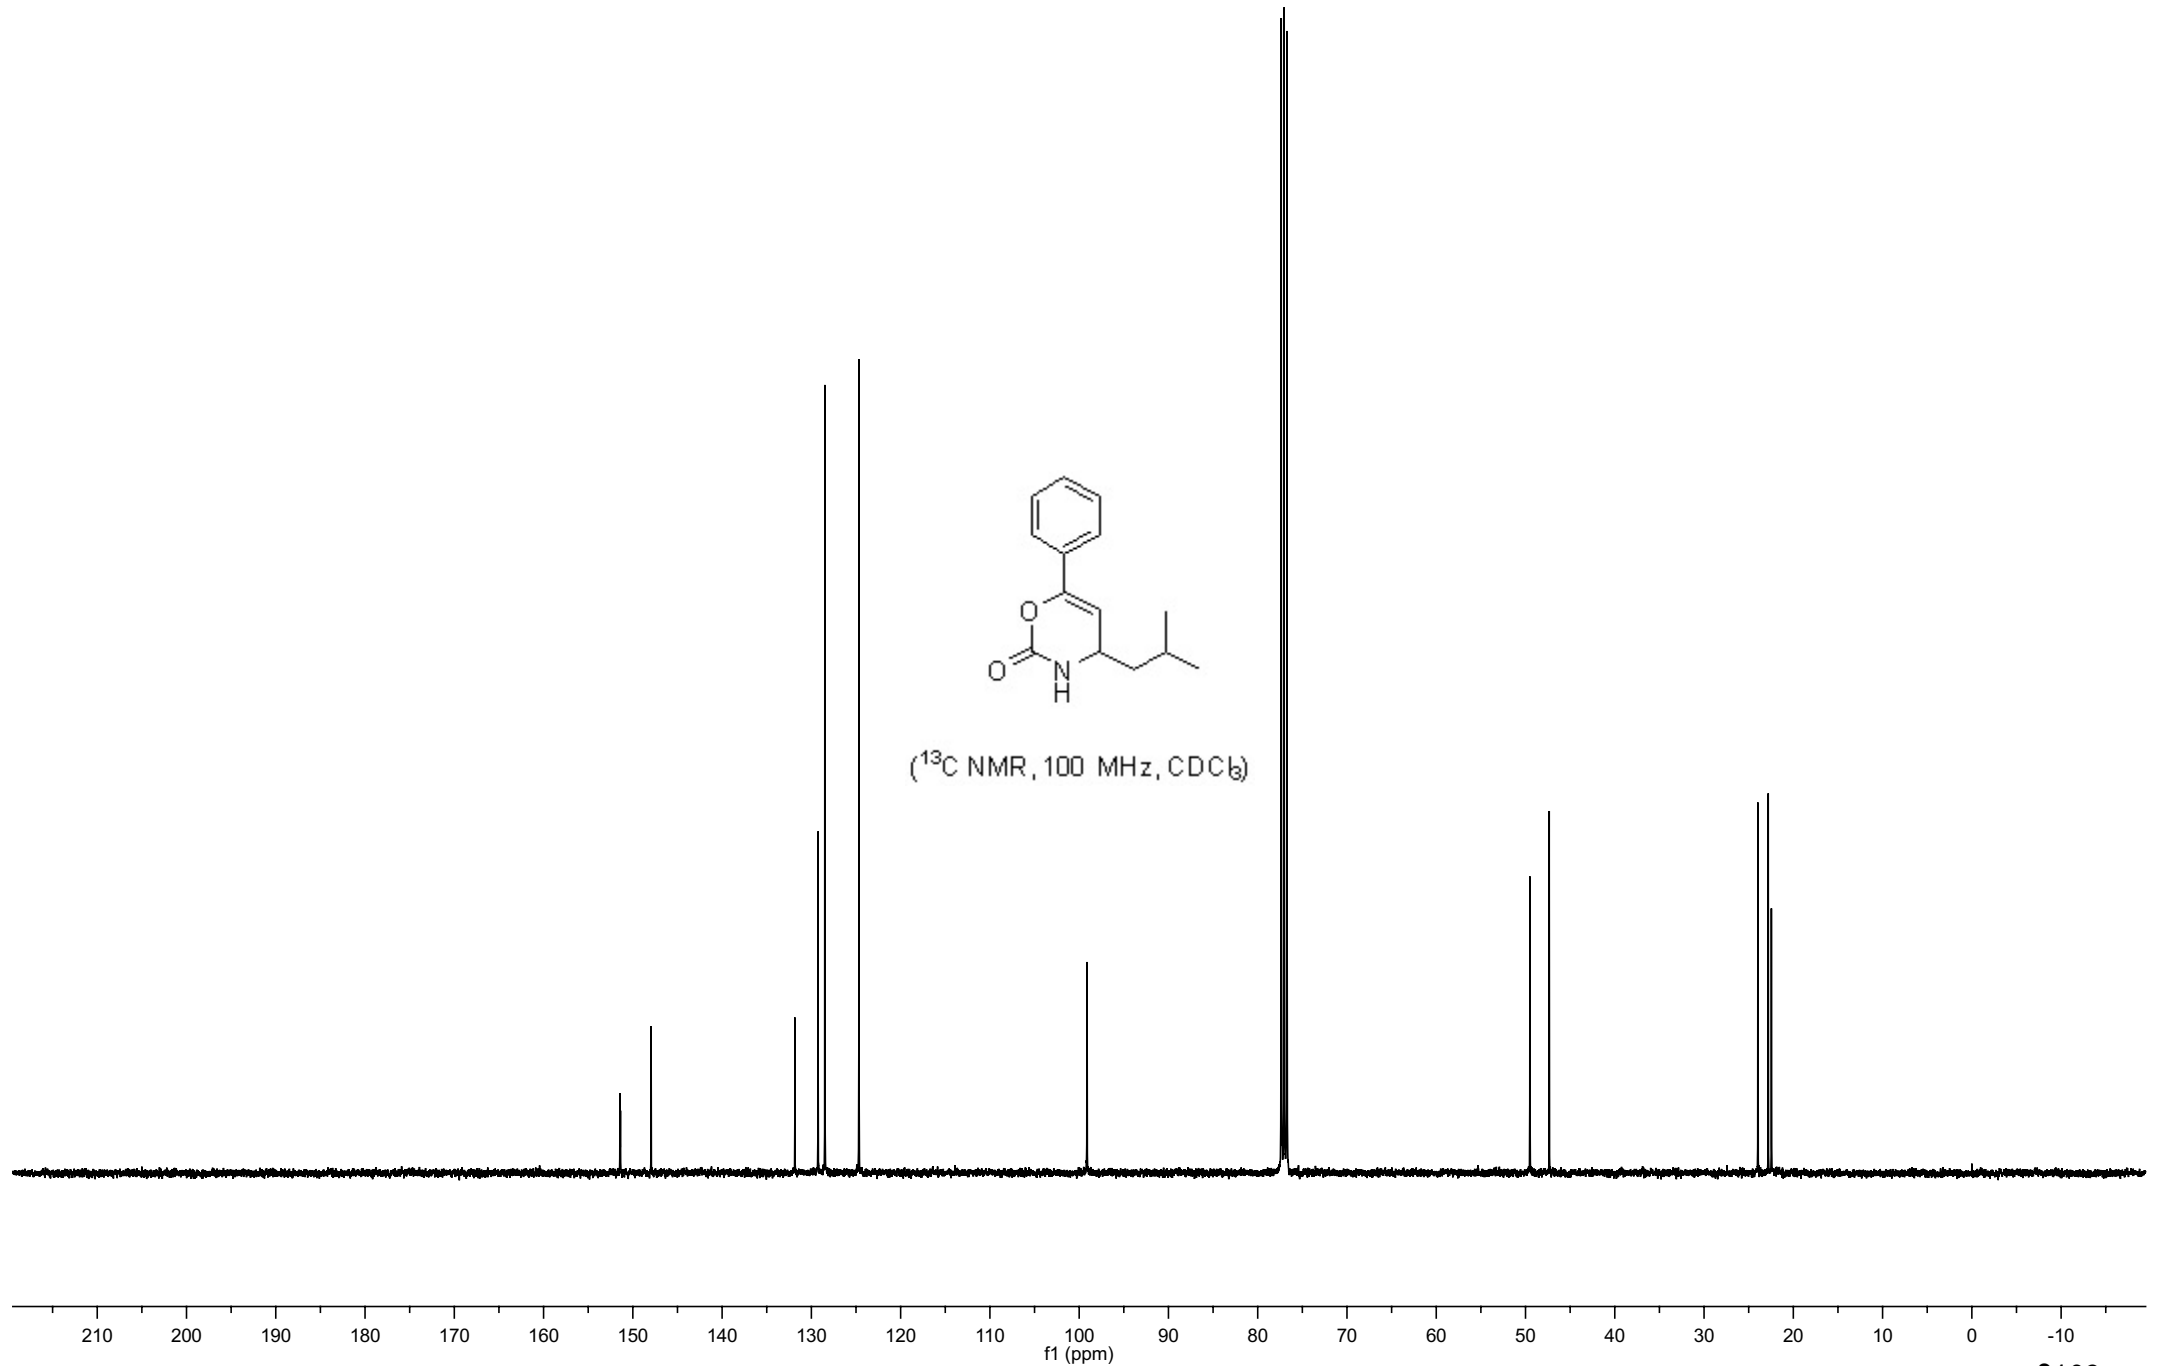

NMR spectra of compound 3qa

7.624  
7.618  
7.615  
7.613  
7.604  
7.600  
7.592

7.370  
7.293  
7.208  
7.165  
6.897

5.530  
5.526  
5.521  
5.517

4.268  
4.263  
4.254  
4.249  
4.244  
4.240  
4.230  
4.226

2.791  
2.771  
2.751

2.023  
2.019  
2.004  
1.997  
1.992  
1.983  
1.969  
1.964

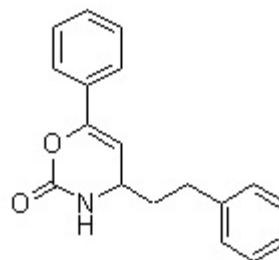

(<sup>1</sup>H NMR, 400 MHz, DMSO-d<sub>6</sub>)

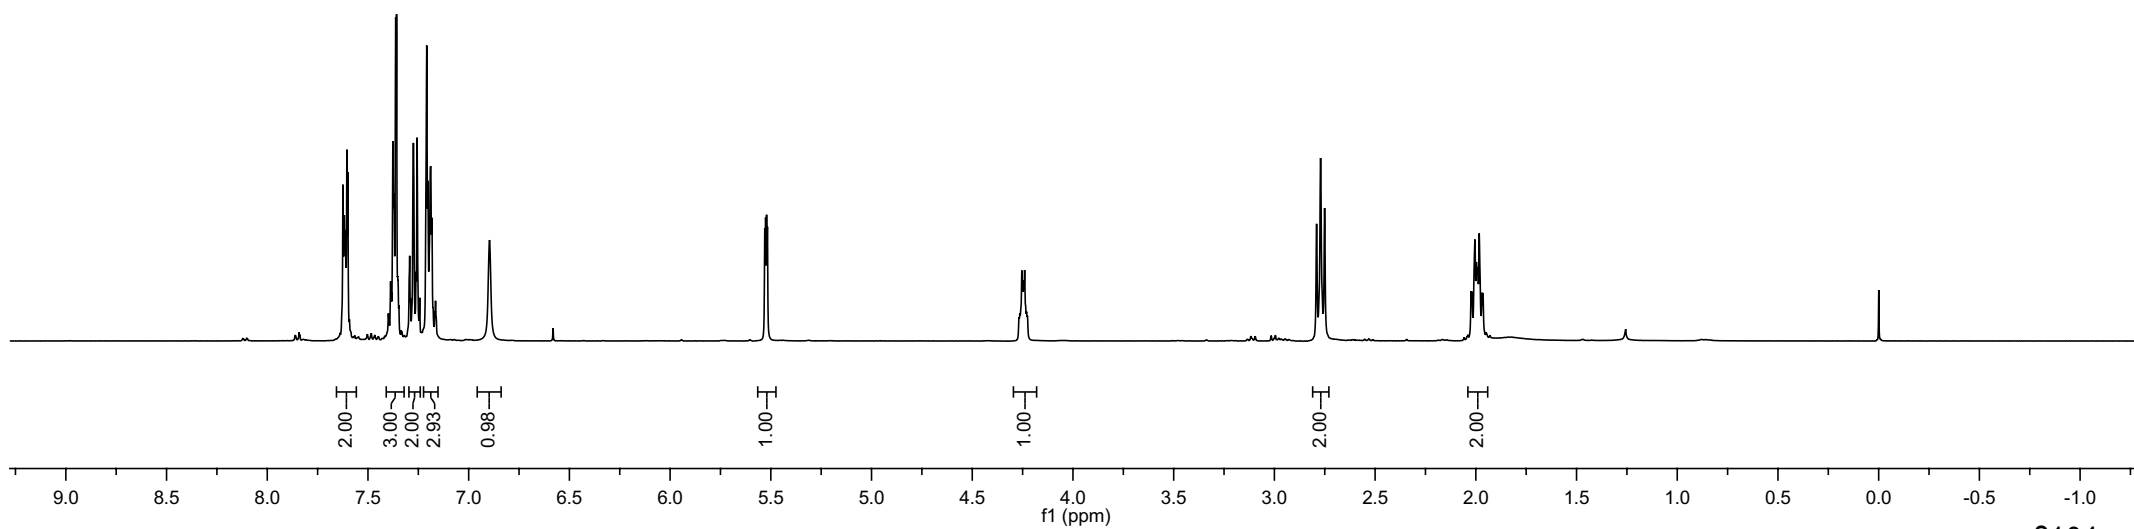



# NMR spectra of compound 3qa

- 151.712
- 148.449
- 140.789
- 131.733
- 129.356
- 128.616
- 128.514
- 128.408
- 126.207
- 124.713
- 98.563
- 50.887
- 39.415
- 30.707

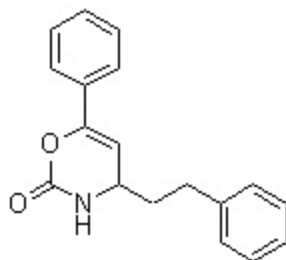

(<sup>13</sup>C NMR, 100 MHz, DMSO-d<sub>6</sub>)

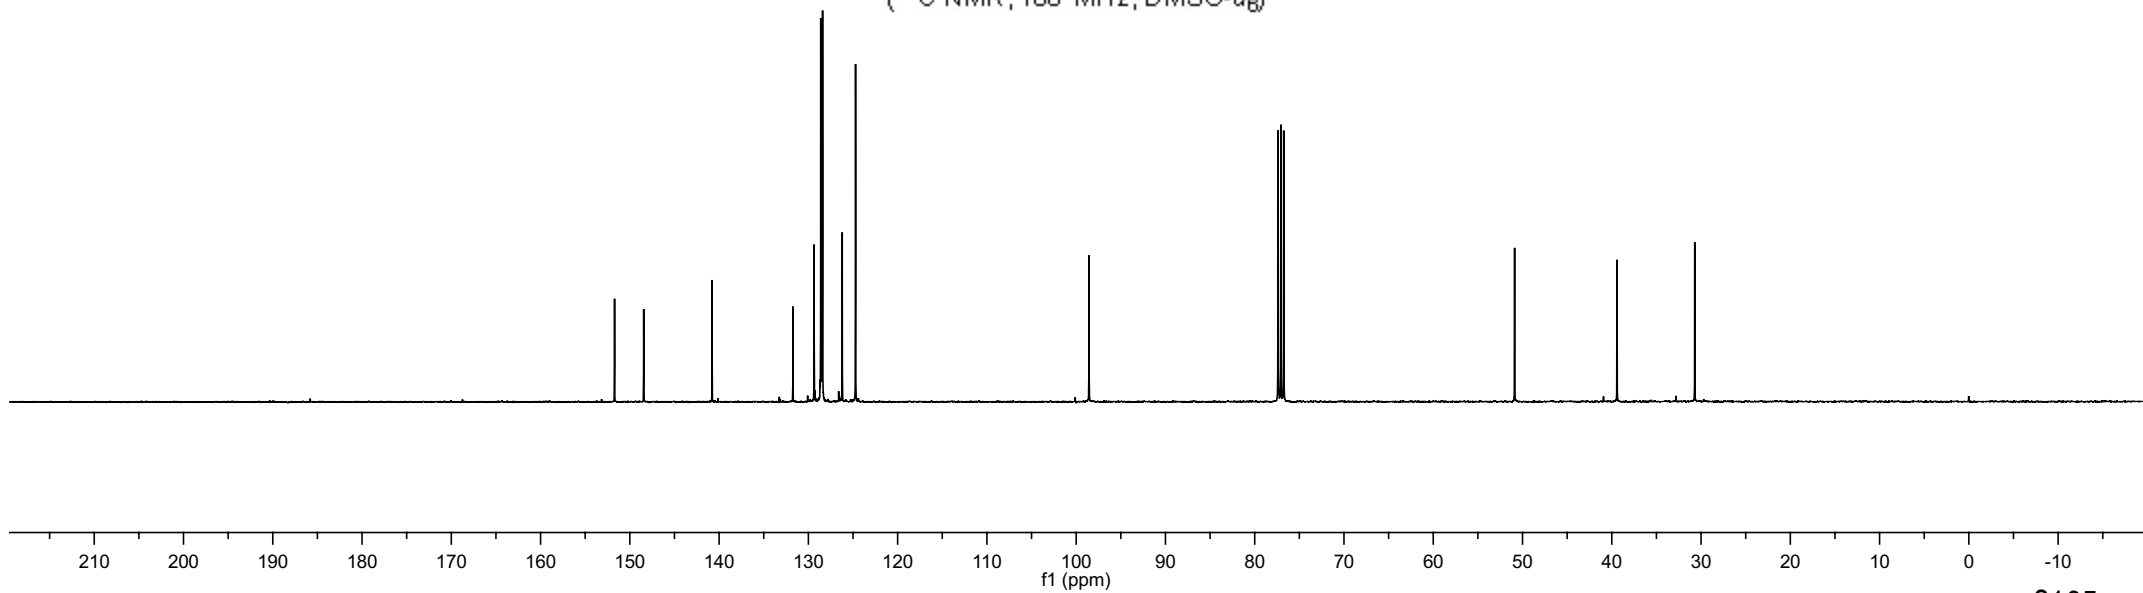

NMR spectra of compound 3ra

7.625, 7.615, 7.606, 7.600, 7.591, 7.384, 7.372, 7.364, 7.349, 7.329, 7.309, 7.293, 6.037, 6.011, 5.454, 5.449, 5.445, 5.441, 4.605, 4.575, 4.555, 4.525, 4.375, 4.357, 4.348, 3.579, 3.570, 3.557, 3.547, 3.474, 3.452, 3.429

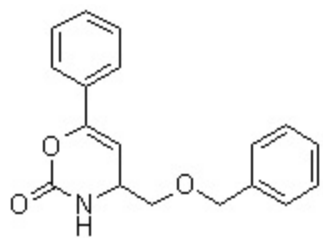

(<sup>1</sup>H NMR, 400 MHz, CDCl<sub>3</sub>)

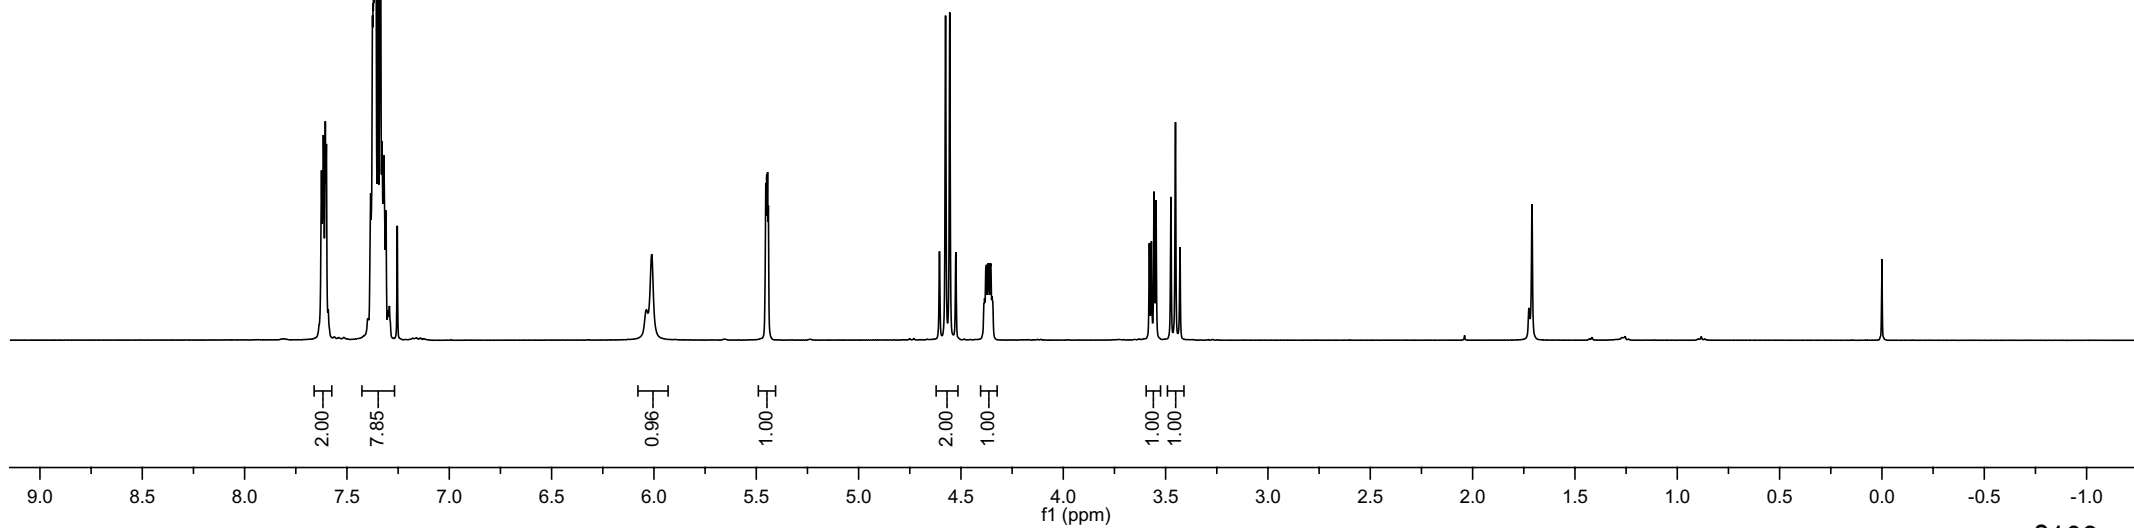



NMR spectra of compound 3sa

8.609

7.687

7.683

7.667

7.654

7.418

7.111

7.110

7.041

7.032

7.028

7.019

6.106

6.096

5.554

5.549

5.544

5.539

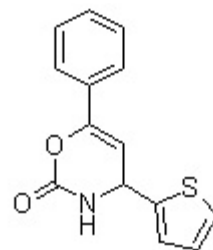

(<sup>1</sup>H NMR, 400 MHz, DMSO-*d*<sub>6</sub>)

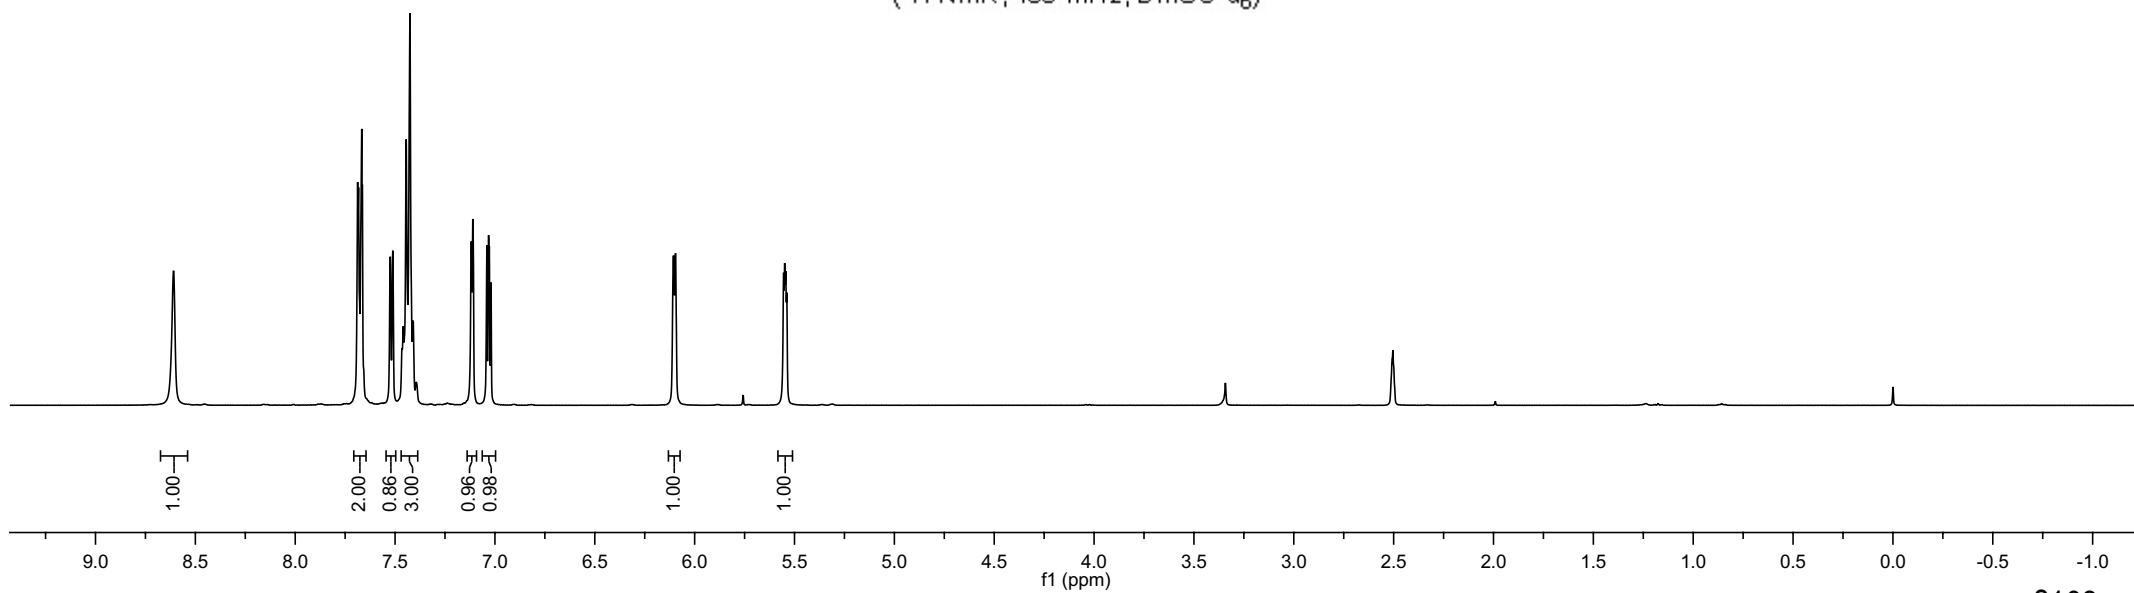

NMR spectra of compound 3sa

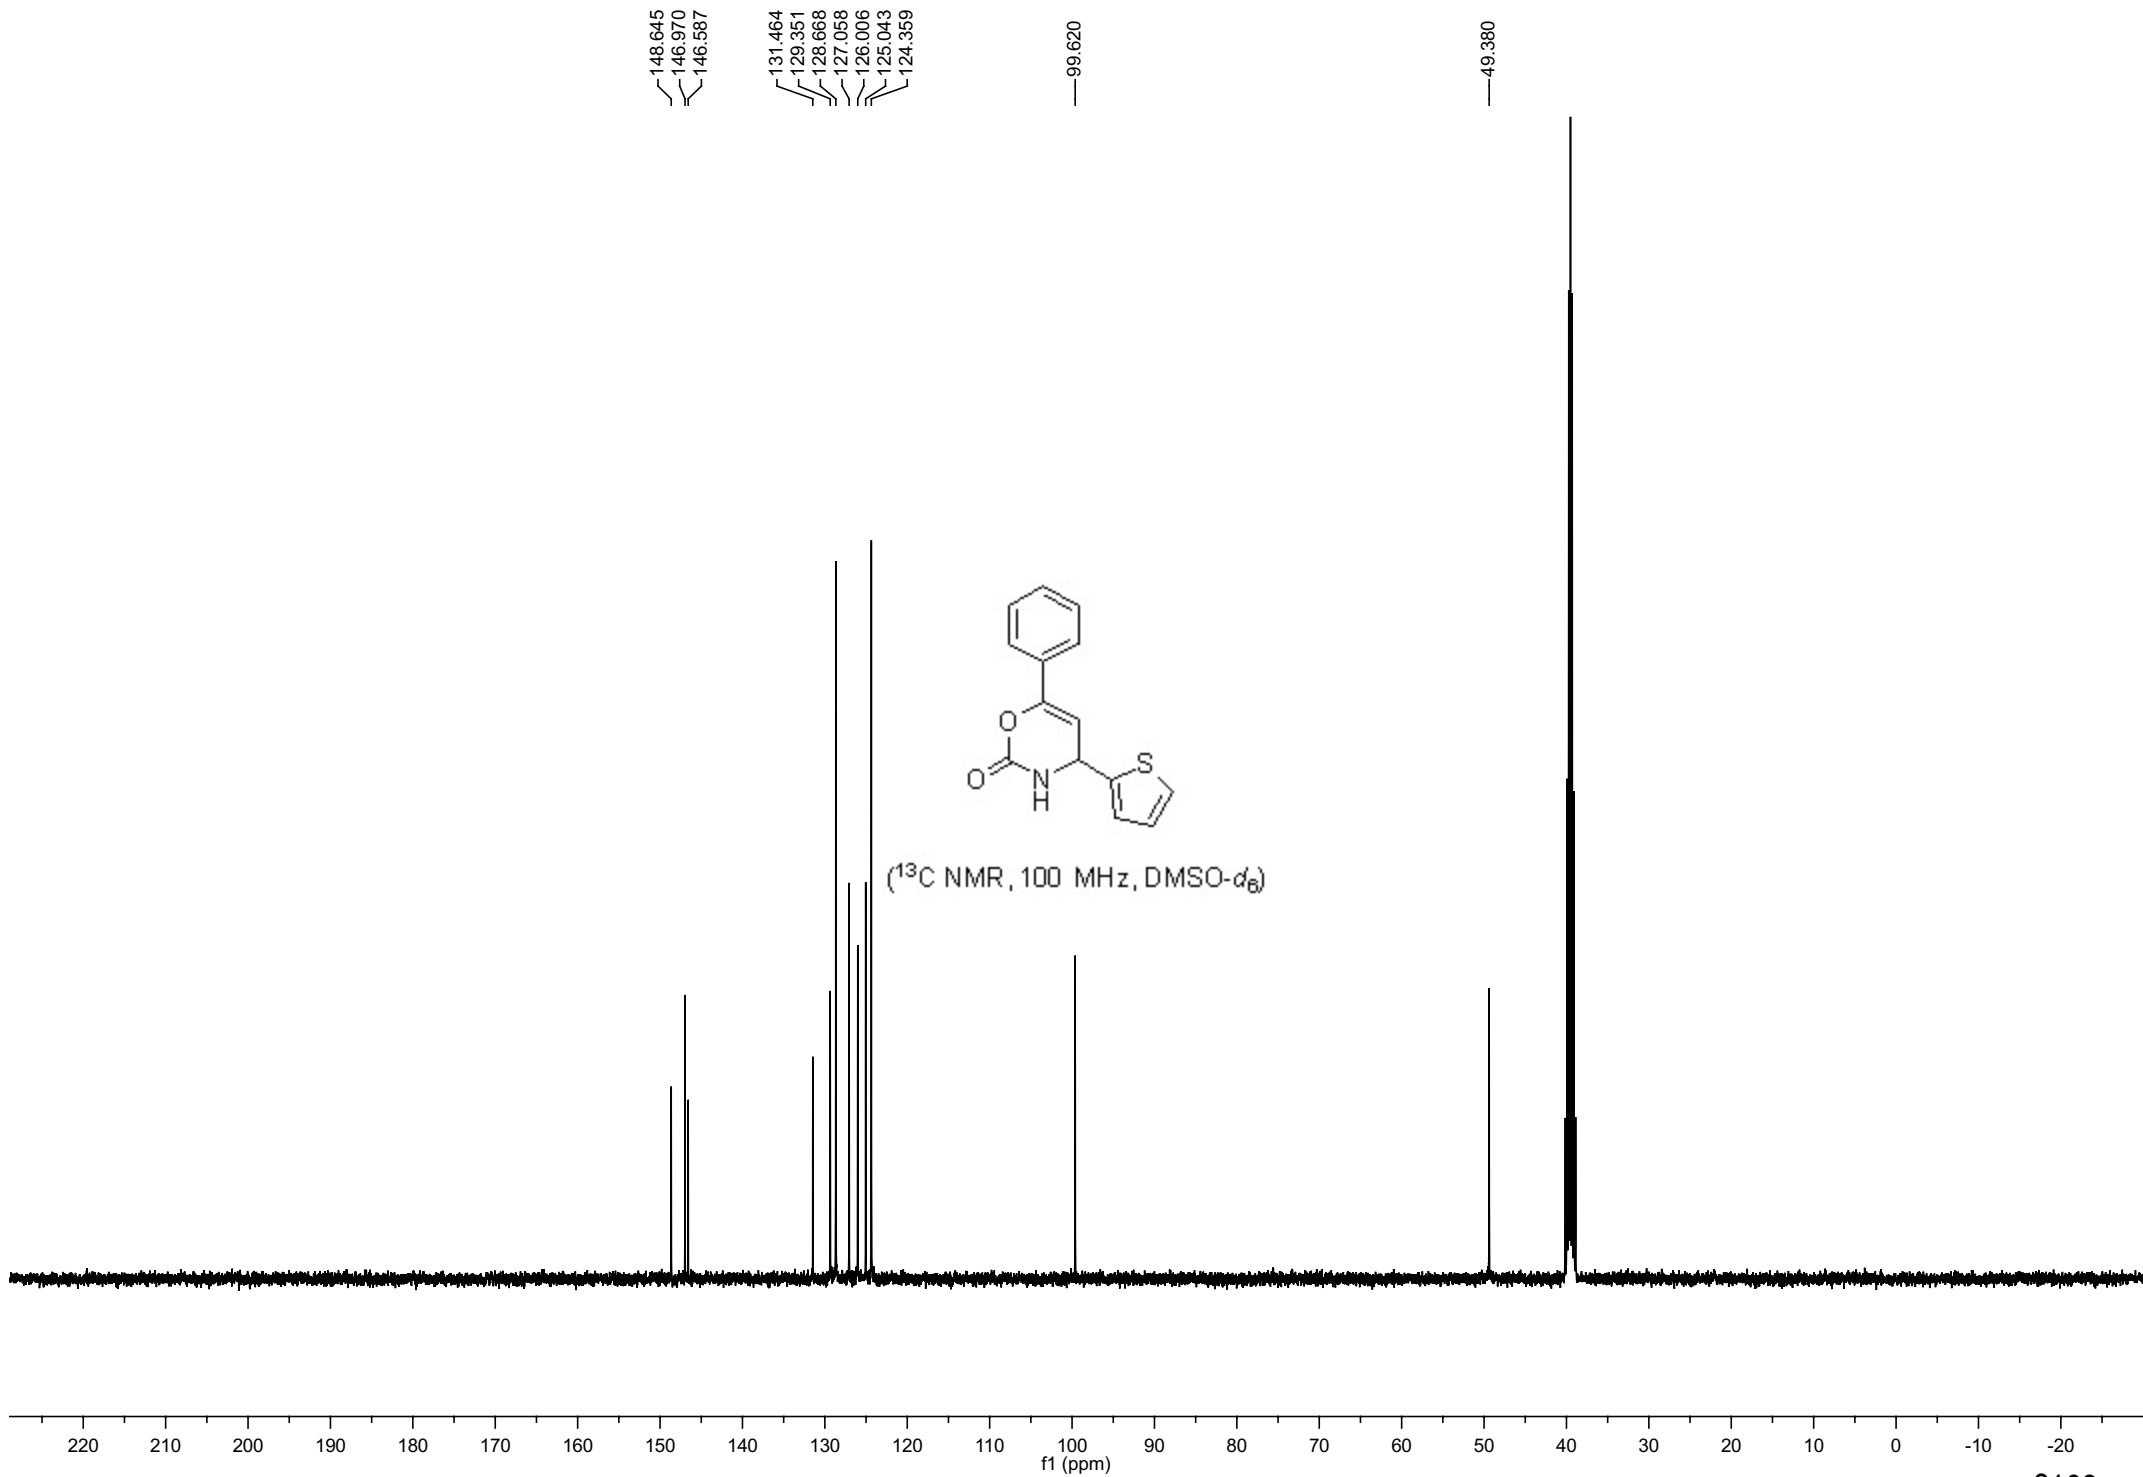

Supplement: d2ob00900e1.pdf [file d2ob00900e1.pdf]
